# Supplementary material
Source: publisher site journal article supplement (https://www.dovepress.com/article/497201)
Supplement: Supplementary file 1 [file get_supplementary_file.php]

**Supplementary data**

**Figure S1. Experimental flow chart.**

**
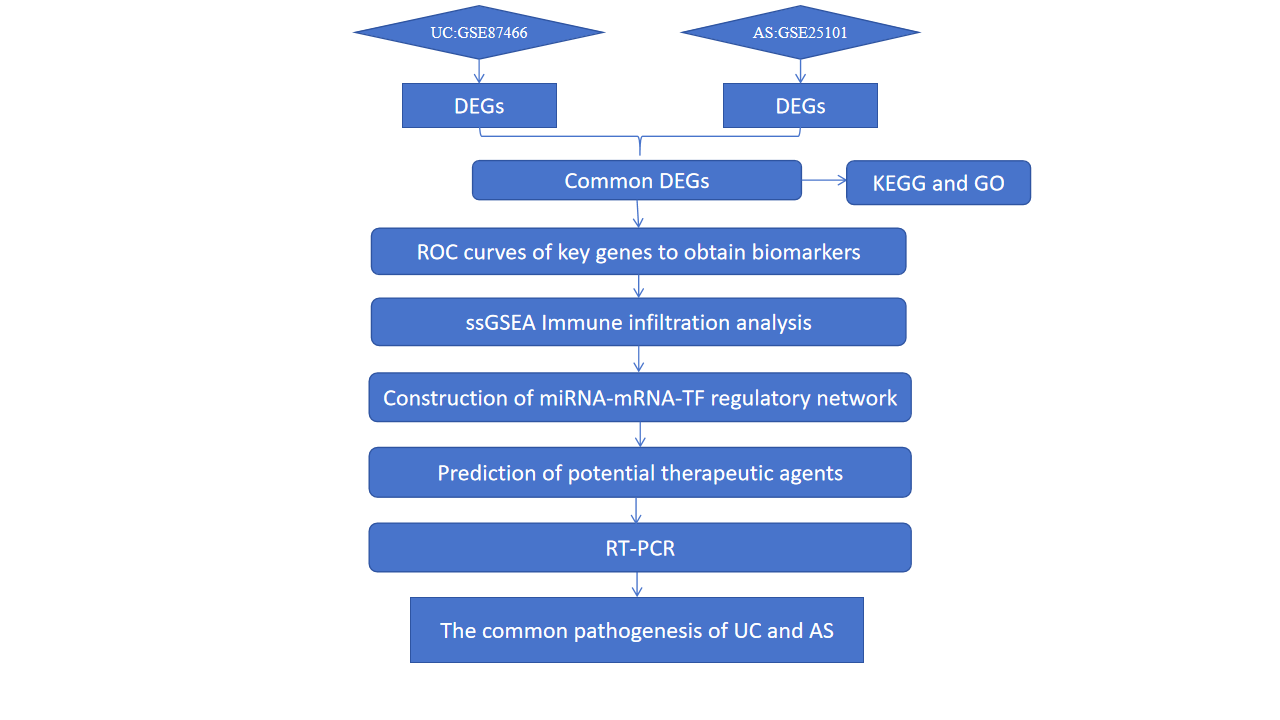
**

**Figure S2. Boxplot of dataset representations.**

**
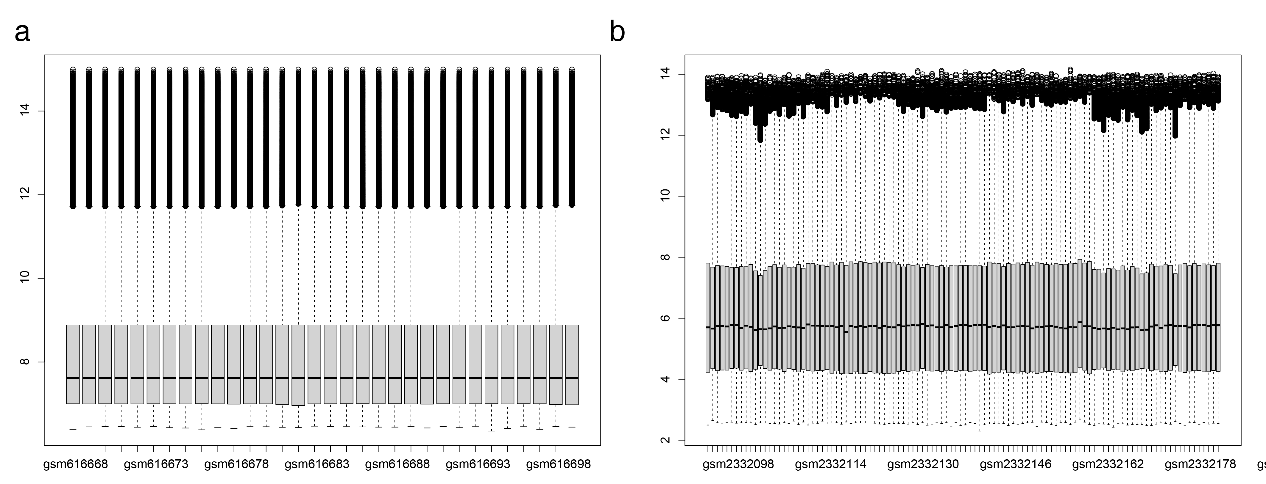
**

a. Boxplot of GSE25101 data. b. Boxplot of GSE87466 data. Graph shows the number of samples in the dataset, initial number of genes, upper limit of expression values, and lower limit of expression values.

# Table S1. DEGs in GSE87466

| Symbol | logFC | AveExpr | t | P.Value | adj.P.Val | B | Significant |
| --- | --- | --- | --- | --- | --- | --- | --- |
| SLC6A14 | 5.019548 | 9.416799 | 21.401 | 8.31E-41 | 1.71E-36 | 81.90974 | up |
| DUOX2 | 4.918819 | 9.917253 | 17.29645 | 5.17E-33 | 2.38E-29 | 64.42697 | up |
| TIMP1 | 2.141531 | 11.39769 | 16.8549 | 4.04E-32 | 1.39E-28 | 62.41354 | up |
| LCN2 | 2.860809 | 12.09176 | 16.67034 | 9.61E-32 | 2.83E-28 | 61.56435 | up |
| PI3 | 2.32595 | 12.15779 | 14.9636 | 3.56E-28 | 6.68E-25 | 53.50312 | up |
| CXCL1 | 3.799602 | 10.24888 | 14.59613 | 2.19E-27 | 3.76E-24 | 51.72003 | up |
| S100P | 1.758462 | 12.23446 | 13.93983 | 5.80E-26 | 7.98E-23 | 48.49631 | up |
| LPCAT1 | 1.590139 | 10.40204 | 13.856 | 8.84E-26 | 1.07E-22 | 48.08107 | up |
| UBE2L6 | 1.285781 | 10.50388 | 13.6108 | 3.05E-25 | 3.00E-22 | 46.86221 | up |
| ARNTL2 | 1.297843 | 6.469341 | 13.58694 | 3.44E-25 | 3.17E-22 | 46.74324 | up |
| PARP8 | 1.247254 | 7.187592 | 12.87254 | 1.32E-23 | 6.80E-21 | 43.15556 | up |
| IRAK3 | 1.393493 | 6.425818 | 12.83083 | 1.63E-23 | 7.66E-21 | 42.94459 | up |
| MMP3 | 5.114665 | 9.320642 | 12.69418 | 3.30E-23 | 1.45E-20 | 42.25239 | up |
| CXCL3 | 2.521603 | 9.024085 | 12.43996 | 1.22E-22 | 4.95E-20 | 40.96037 | up |
| ASPHD2 | 1.034212 | 7.844379 | 12.31595 | 2.33E-22 | 8.41E-20 | 40.32822 | up |
| DUOXA2 | 3.219795 | 9.022667 | 12.30959 | 2.40E-22 | 8.41E-20 | 40.2958 | up |
| GPX8 | 1.511107 | 8.264697 | 12.29426 | 2.60E-22 | 8.95E-20 | 40.21753 | up |
| SHISA5 | 0.51261 | 11.5901 | 12.25865 | 3.13E-22 | 1.06E-19 | 40.03574 | up |
| PEA15 | 0.975967 | 9.04645 | 12.22588 | 3.71E-22 | 1.21E-19 | 39.86838 | up |
| PDZK1IP1 | 1.938239 | 11.4626 | 12.21309 | 3.96E-22 | 1.23E-19 | 39.80302 | up |
| CDH3 | 2.431424 | 6.725507 | 12.21192 | 3.99E-22 | 1.23E-19 | 39.79703 | up |
| S100A8 | 4.160618 | 9.985789 | 12.15486 | 5.36E-22 | 1.60E-19 | 39.50533 | up |
| ARMCX3 | 0.796538 | 9.723074 | 12.05337 | 9.08E-22 | 2.53E-19 | 38.98591 | up |
| TMEM173 | 1.119012 | 8.446088 | 12.04551 | 9.46E-22 | 2.60E-19 | 38.94564 | up |
| VNN1 | 2.927837 | 8.351869 | 12.03074 | 1.02E-21 | 2.77E-19 | 38.87001 | up |
| CD55 | 2.032935 | 10.52425 | 12.00918 | 1.14E-21 | 2.99E-19 | 38.75949 | up |
| COL6A3 | 1.61205 | 10.77674 | 11.97303 | 1.38E-21 | 3.51E-19 | 38.57421 | up |
| MANF | 0.954507 | 11.56515 | 11.96376 | 1.45E-21 | 3.64E-19 | 38.52671 | up |
| IFI16 | 1.415016 | 9.651379 | 11.89293 | 2.09E-21 | 5.08E-19 | 38.16332 | up |
| CHI3L1 | 3.31077 | 7.63585 | 11.83583 | 2.82E-21 | 6.46E-19 | 37.87018 | up |
| VCAM1 | 1.366887 | 10.30937 | 11.74234 | 4.59E-21 | 1.03E-18 | 37.38979 | up |
| ARHGEF3 | 1.105207 | 9.048392 | 11.73326 | 4.81E-21 | 1.06E-18 | 37.3431 | up |
| SEC13 | 0.619004 | 11.38133 | 11.72939 | 4.91E-21 | 1.06E-18 | 37.32319 | up |
| MTHFD2 | 0.889263 | 9.573608 | 11.72145 | 5.12E-21 | 1.09E-18 | 37.28234 | up |
| BTN3A3 | 1.108812 | 9.549243 | 11.68612 | 6.15E-21 | 1.30E-18 | 37.10062 | up |
| CALU | 1.051865 | 8.448051 | 11.66704 | 6.80E-21 | 1.38E-18 | 37.00245 | up |
| C2 | 1.111487 | 7.46084 | 11.5809 | 1.07E-20 | 2.06E-18 | 36.55897 | up |
| GABBR1 | 2.882236 | 10.62678 | 11.57108 | 1.12E-20 | 2.14E-18 | 36.50835 | up |
| BACE2 | 1.195342 | 10.35753 | 11.544 | 1.29E-20 | 2.43E-18 | 36.36884 | up |
| IFITM3 | 0.914232 | 12.57067 | 11.51891 | 1.47E-20 | 2.72E-18 | 36.23955 | up |
| MMP12 | 2.592054 | 10.7826 | 11.2667 | 5.52E-20 | 9.74E-18 | 34.93808 | up |
| DAPP1 | 1.273405 | 6.375541 | 11.20062 | 7.81E-20 | 1.37E-17 | 34.5966 | up |
| RBPMS | 0.77825 | 6.847859 | 11.17445 | 8.96E-20 | 1.53E-17 | 34.46134 | up |
| S100A11 | 1.020645 | 10.33574 | 11.14379 | 1.05E-19 | 1.75E-17 | 34.30281 | up |
| PLA2G2A | 1.586683 | 12.35895 | 11.11788 | 1.21E-19 | 1.97E-17 | 34.16883 | up |
| CTSK | 1.74496 | 9.473412 | 11.11176 | 1.24E-19 | 2.02E-17 | 34.13718 | up |
| PIM3 | 1.057845 | 9.812895 | 11.07149 | 1.54E-19 | 2.46E-17 | 33.92887 | up |
| LRP8 | 1.496899 | 5.795116 | 11.03693 | 1.84E-19 | 2.93E-17 | 33.75003 | up |
| IGDCC4 | 1.882489 | 8.401609 | 11.01618 | 2.06E-19 | 3.24E-17 | 33.64262 | up |
| WARS | 1.637923 | 9.902529 | 10.9832 | 2.44E-19 | 3.76E-17 | 33.47195 | up |
| TNIP3 | 3.921719 | 7.021432 | 10.97929 | 2.49E-19 | 3.81E-17 | 33.45169 | up |
| FILIP1L | 1.147373 | 6.140687 | 10.93952 | 3.07E-19 | 4.66E-17 | 33.24577 | up |
| MMP10 | 3.455307 | 7.374554 | 10.92533 | 3.31E-19 | 4.99E-17 | 33.1723 | up |
| SAA1 | 3.813993 | 9.629187 | 10.91962 | 3.41E-19 | 5.10E-17 | 33.14272 | up |
| HLA-DMA | 1.182579 | 10.64265 | 10.90343 | 3.72E-19 | 5.48E-17 | 33.05891 | up |
| SEC24D | 1.15522 | 6.359343 | 10.8633 | 4.59E-19 | 6.67E-17 | 32.85103 | up |
| HSPA5 | 0.786281 | 10.14228 | 10.78216 | 7.03E-19 | 9.80E-17 | 32.43064 | up |

**Table S2. GO analysis of GSE87466**

ONTOLOGY ID Description GeneRatio BgRatio pvalue p.adjust qvalue geneID Count

BP GO:0007159 leukocyte cell-cell adhesion 133/2416 366/18862 3.78536186368362e-31 2.25607567075544e-27 1.57192132128757e-27 S100A8/VNN1/CD55/VCAM1/ITGA5/THY1/MSN/LYN/PECAM1/IDO1/HLA-DRB1/IL1B/ANXA1/TWSG1/SELP/LILRB2/ZC3H12A/NFKBIZ/S100A9/LAX1/ICAM1/ITGB2/NOD2/CD44/XBP1/CCL2/LILRB1/PCK1/FYN/MIR21/PTAFR/LAPTM5/IRF1/SOCS1/CD274/SIRPA/PTPRC/TNFSF13B/RAC2/CTLA4/IL7R/SELL/CD74/SASH3/HLA-DRA/CD86/VAV1/ICOS/TIGIT/PAG1/IL2RA/CEBPB/CORO1A/IL12RB1/HLA-DMB/BTN2A2/EGR3/ASS1/CR1/CD80/RIPK2/LEF1/MAP3K8/ADA/CAV1/SEMA4D/RHOH/BMP7/ITGAL/DOCK8/CD27/ETS1/TNFAIP8L2/HHLA2/CD5/CD83/MALT1/MADCAM1/LCK/PLA2G2D/IHH/CCL21/FCGR2B/SELPLG/NCKAP1L/DUSP10/CCL19/LRRC32/CCR7/AIF1/IL27RA/STK10/TNFSF9/LGALS1/RUNX3/LILRB4/NR4A3/IL23A/CD160/IL1A/HLA-DPA1/CRTAM/BCL6/TNFSF11/CD300A/PNP/PRKCQ/SMAD7/HLA-DPB1/NRARP/ITGA4/TNF/EBI3/PTPN6/CD1D/CERCAM/GCNT1/CD3E/FERMT3/ST3GAL4/LAG3/SIRPB1/SKAP1/SELE/IL6/JAM2/KLF4/RASAL3/IFNG/PRKAR1A/DTX1/CXCL12/CD177 133

BP GO:0045785 positive regulation of cell adhesion 140/2416 425/18862 1.13043387688106e-27 2.50598114371898e-24 1.74604302578088e-24 GCNT2/VNN1/CD55/VCAM1/PDPN/ITGA5/THY1/MAGI1/TGM2/LYN/OLFM4/HLA-DRB1/IL1B/ANXA1/ANK3/FERMT2/EPB41L5/SELP/LILRB2/NFKBIZ/EPB41L4B/CX3CL1/ICAM1/ITGB2/NOD2/CD44/XBP1/CCL2/STX3/LILRB1/PCK1/FYN/MIR21/PTAFR/SOCS1/CD274/SIRPA/PTPRC/TNFSF13B/CTLA4/IL7R/VAV3/PLAUR/CD74/SASH3/HLA-DRA/CD86/IFT74/TEK/VAV1/ICOS/CXCL13/IL2RA/KIFAP3/CORO1A/JAK2/IL12RB1/HLA-DMB/EGR3/CEACAM6/CALR/CR1/CD80/PODXL/RIPK2/LEF1/EGFL6/MAP3K8/ADA/CAV1/RHOH/CCDC80/BMP7/DOCK8/EFEMP2/CD27/KDR/ETS1/HHLA2/CD5/CD83/MALT1/P4HB/LCK/IHH/CCL21/MAP4K4/NCKAP1L/DUSP10/CCL19/NID1/CCR7/AIF1/IL27RA/TNFSF9/LGALS1/PREX1/SPOCK2/RUNX3/EGFLAM/LILRB4/NR4A3/CD36/IL23A/ADAM19/CD160/IL1A/HLA-DPA1/FUT1/BCL6/TNFSF11/PNP/PRKCQ/ITGAV/SMAD7/HLA-DPB1/ITGA4/TNF/EBI3/MYADM/PTPN6/FLNA/ITGA2/WNT5A/CD1D/CD3E/ST3GAL4/SIRPB1/SKAP1/SELE/LIF/IL6/FN1/ADAM9/RASAL3/IFNG/FOXF1/HYAL1/SFRP2/CXCL12 140

BP GO:0030198 extracellular matrix organization 133/2416 393/18862 1.26942314537584e-27 2.50598114371898e-24 1.74604302578088e-24 TIMP1/MMP3/COL6A3/VCAM1/MMP12/CTSK/MMP10/SERPINB5/MMP1/PDPN/PRDX4/ITGA5/MMP9/LUM/COL4A1/PECAM1/GREM1/RAMP2/LAMC1/SULF1/COL1A2/LAMA1/TGFBI/COL5A2/BSG/ICAM2/MMP7/TMEM38B/ADAMTS9/BGN/MPZL3/ICAM1/ITGB2/CD44/ITGAX/ADAMTS1/SPARC/FSCN1/FBN1/CFLAR/TNC/LOXL1/TNFRSF1B/COL15A1/HTRA1/COL3A1/TIE1/MMP19/AGT/FAP/ADAMTS3/LCP1/EGFL6/CAV1/SH3PXD2B/CCDC80/MMP28/FLRT2/ITGAL/EFEMP2/KDR/ETS1/COL4A2/PXDN/SULF2/MADCAM1/DDR2/IHH/VWF/SPINK5/COL1A1/NID1/COL14A1/AEBP1/SPOCK2/EGFLAM/MFAP4/PAPLN/DCN/FMOD/LAMB1/CSGALNACT1/VCAN/FBLN5/ADAM19/COL18A1/COL12A1/SPINT1/FGF2/ADAMTS5/MMP14/COL5A3/SERPINH1/FKBP10/TTR/COL5A1/SPP1/ITGAV/ENG/COL23A1/ITGA4/TNF/TIMP2/LAMC2/ITGA2/KLKB1/LAMB2/ADAMTS12/ADAM12/IL6/FN1/JAM2/SERPINE1/DDR1/NTNG2/CAV2/OLFML2A/NTN4/COL7A1/NID2/PRSS1/COL6A2/ELF3/HAPLN1/FOXF1/MIA/TNFRSF11B/TPSAB1/SFRP2/DPT/KLK7/LAMA5/MMP13 133

BP GO:0043062 extracellular structure organization 133/2416 394/18862 1.68186653940871e-27 2.50598114371898e-24 1.74604302578088e-24 TIMP1/MMP3/COL6A3/VCAM1/MMP12/CTSK/MMP10/SERPINB5/MMP1/PDPN/PRDX4/ITGA5/MMP9/LUM/COL4A1/PECAM1/GREM1/RAMP2/LAMC1/SULF1/COL1A2/LAMA1/TGFBI/COL5A2/BSG/ICAM2/MMP7/TMEM38B/ADAMTS9/BGN/MPZL3/ICAM1/ITGB2/CD44/ITGAX/ADAMTS1/SPARC/FSCN1/FBN1/CFLAR/TNC/LOXL1/TNFRSF1B/COL15A1/HTRA1/COL3A1/TIE1/MMP19/AGT/FAP/ADAMTS3/LCP1/EGFL6/CAV1/SH3PXD2B/CCDC80/MMP28/FLRT2/ITGAL/EFEMP2/KDR/ETS1/COL4A2/PXDN/SULF2/MADCAM1/DDR2/IHH/VWF/SPINK5/COL1A1/NID1/COL14A1/AEBP1/SPOCK2/EGFLAM/MFAP4/PAPLN/DCN/FMOD/LAMB1/CSGALNACT1/VCAN/FBLN5/ADAM19/COL18A1/COL12A1/SPINT1/FGF2/ADAMTS5/MMP14/COL5A3/SERPINH1/FKBP10/TTR/COL5A1/SPP1/ITGAV/ENG/COL23A1/ITGA4/TNF/TIMP2/LAMC2/ITGA2/KLKB1/LAMB2/ADAMTS12/ADAM12/IL6/FN1/JAM2/SERPINE1/DDR1/NTNG2/CAV2/OLFML2A/NTN4/COL7A1/NID2/PRSS1/COL6A2/ELF3/HAPLN1/FOXF1/MIA/TNFRSF11B/TPSAB1/SFRP2/DPT/KLK7/LAMA5/MMP13 133

BP GO:0045229 external encapsulating structure organization 133/2416 396/18862 2.9408884303974e-27 3.5055390090337e-24 2.44248523324584e-24 TIMP1/MMP3/COL6A3/VCAM1/MMP12/CTSK/MMP10/SERPINB5/MMP1/PDPN/PRDX4/ITGA5/MMP9/LUM/COL4A1/PECAM1/GREM1/RAMP2/LAMC1/SULF1/COL1A2/LAMA1/TGFBI/COL5A2/BSG/ICAM2/MMP7/TMEM38B/ADAMTS9/BGN/MPZL3/ICAM1/ITGB2/CD44/ITGAX/ADAMTS1/SPARC/FSCN1/FBN1/CFLAR/TNC/LOXL1/TNFRSF1B/COL15A1/HTRA1/COL3A1/TIE1/MMP19/AGT/FAP/ADAMTS3/LCP1/EGFL6/CAV1/SH3PXD2B/CCDC80/MMP28/FLRT2/ITGAL/EFEMP2/KDR/ETS1/COL4A2/PXDN/SULF2/MADCAM1/DDR2/IHH/VWF/SPINK5/COL1A1/NID1/COL14A1/AEBP1/SPOCK2/EGFLAM/MFAP4/PAPLN/DCN/FMOD/LAMB1/CSGALNACT1/VCAN/FBLN5/ADAM19/COL18A1/COL12A1/SPINT1/FGF2/ADAMTS5/MMP14/COL5A3/SERPINH1/FKBP10/TTR/COL5A1/SPP1/ITGAV/ENG/COL23A1/ITGA4/TNF/TIMP2/LAMC2/ITGA2/KLKB1/LAMB2/ADAMTS12/ADAM12/IL6/FN1/JAM2/SERPINE1/DDR1/NTNG2/CAV2/OLFML2A/NTN4/COL7A1/NID2/PRSS1/COL6A2/ELF3/HAPLN1/FOXF1/MIA/TNFRSF11B/TPSAB1/SFRP2/DPT/KLK7/LAMA5/MMP13 133

BP GO:0022409 positive regulation of cell-cell adhesion 105/2416 276/18862 1.08686145832324e-26 1.07961571526775e-23 7.52222535628982e-24 GCNT2/VNN1/CD55/VCAM1/PDPN/THY1/MAGI1/LYN/HLA-DRB1/IL1B/ANXA1/ANK3/SELP/LILRB2/NFKBIZ/CX3CL1/ICAM1/ITGB2/NOD2/CD44/XBP1/CCL2/LILRB1/PCK1/FYN/MIR21/PTAFR/SOCS1/CD274/SIRPA/PTPRC/TNFSF13B/CTLA4/IL7R/PLAUR/CD74/SASH3/HLA-DRA/CD86/VAV1/ICOS/CXCL13/IL2RA/KIFAP3/CORO1A/IL12RB1/HLA-DMB/EGR3/CEACAM6/CR1/CD80/PODXL/RIPK2/LEF1/MAP3K8/ADA/CAV1/RHOH/BMP7/DOCK8/CD27/ETS1/HHLA2/CD5/CD83/MALT1/LCK/IHH/CCL21/NCKAP1L/DUSP10/CCL19/CCR7/AIF1/IL27RA/TNFSF9/LGALS1/RUNX3/LILRB4/NR4A3/IL23A/ADAM19/CD160/IL1A/HLA-DPA1/BCL6/TNFSF11/PNP/PRKCQ/SMAD7/HLA-DPB1/ITGA4/TNF/EBI3/PTPN6/WNT5A/CD1D/CD3E/ST3GAL4/SIRPB1/SKAP1/SELE/IL6/RASAL3/IFNG 105

BP GO:0022407 regulation of cell-cell adhesion 140/2416 437/18862 2.61854141187486e-26 2.22950097353917e-23 1.55340539396185e-23 B4GALNT2/GCNT2/VNN1/CD55/VCAM1/PDPN/THY1/MAGI1/LYN/IDO1/HLA-DRB1/IL1B/ANXA1/ANK3/TWSG1/EPB41L5/SELP/LILRB2/ZC3H12A/NFKBIZ/CX3CL1/LAX1/EFNA5/ICAM1/ITGB2/NOD2/CD44/XBP1/CCL2/LILRB1/PCK1/FYN/MIR21/PTAFR/LAPTM5/IRF1/SOCS1/CD274/UBASH3B/SIRPA/PTPRC/TNFSF13B/CTLA4/IL7R/PLAUR/CD74/SASH3/HLA-DRA/CD86/FXYD5/VAV1/ICOS/CXCL13/TIGIT/PAG1/IL2RA/CEBPB/KIFAP3/CORO1A/IL1RN/JAK2/IL12RB1/HLA-DMB/BTN2A2/EGR3/ASS1/CEACAM6/CR1/CD80/PODXL/RIPK2/LEF1/MAP3K8/ADA/CAV1/RHOH/BMP7/DOCK8/CD27/ETS1/TNFAIP8L2/HHLA2/CD5/CD83/MALT1/LCK/PLA2G2D/IHH/CCL21/FCGR2B/MAD2L2/NCKAP1L/DUSP10/CCL19/LRRC32/CCR7/AIF1/IL27RA/TNFSF9/LGALS1/RUNX3/LILRB4/NR4A3/IL23A/ADAM19/CD160/IL1A/HLA-DPA1/CRTAM/BCL6/TNFSF11/CD300A/SWAP70/PNP/PRKCQ/SMAD7/HLA-DPB1/NRARP/ITGA4/TNF/EBI3/MYADM/PTPN6/WNT5A/CD1D/CD3E/FERMT3/ST3GAL4/LAG3/SIRPB1/SKAP1/SELE/IL6/KLF4/RASAL3/IFNG/SH2B3/PRKAR1A/DTX1/CXCL12 140

BP GO:0042110 T cell activation 147/2416 474/18862 6.02367040109553e-26 4.48763444881617e-23 3.12676049109498e-23 VNN1/CD55/VCAM1/THY1/MSN/LYN/IDO1/HLA-DRB1/IL1B/ANXA1/TWSG1/EOMES/LILRB2/ZC3H12A/GPR183/NFKBIZ/LAX1/ICAM1/NOD2/CD44/XBP1/CCL2/LILRB1/PCK1/FYN/MIR21/NHEJ1/LAPTM5/IRF1/SOCS1/CD274/BTN3A1/SIRPA/PTPRC/TNFSF13B/RAC2/CTLA4/MR1/SEMA4A/IL7R/SLAMF6/CD74/SASH3/MICB/HLA-DRA/TNFRSF1B/CD86/IL18R1/VAV1/ICOS/TIGIT/PAG1/CD2/IL2RA/CEBPB/CCR6/FZD5/CORO1A/PRDM1/IL12RB1/HLA-DMB/BTN2A2/EGR3/CR1/TNFSF8/CD80/RIPK2/LEF1/RASGRP1/STAT3/LCP1/MAP3K8/ADA/CAV1/RHOH/ITGAL/DOCK8/CD27/FCER1G/ITK/TNFAIP8L2/HHLA2/CD5/EGR1/CD83/MALT1/LCK/PLA2G2D/IHH/SPINK5/CCL21/FCGR2B/NCKAP1L/DUSP10/CLEC4A/CD1C/CCL19/LRRC32/CCR7/AIF1/IL27RA/TNFSF9/CD3D/LGALS1/PREX1/RUNX3/LILRB4/WAS/IL23A/CD160/IL1A/HLA-DPA1/ELF4/IRF4/PIK3CD/CRTAM/BCL6/TNFSF11/CD300A/BATF/CD3G/PNP/MAFB/NLRC3/PRKCQ/TMEM98/SMAD7/HLA-DPB1/NRARP/EBI3/SIT1/PTPN6/CD8A/CD1D/CD3E/LY9/LAG3/SIRPB1/SH3RF1/IL6/F2RL1/RASAL3/IFNG/CXADR/PRKAR1A/DTX1/TCIRG1 147

BP GO:0032496 response to lipopolysaccharide 115/2416 326/18862 8.78301485586072e-26 5.81630761565887e-23 4.05251387209012e-23 CXCL1/IRAK3/CXCL3/S100A8/CD55/VCAM1/FGFR2/TNIP3/CASP1/CXCL9/CXCL2/LYN/IDO1/PCK2/IL1B/SELP/LILRB2/ZC3H12A/PPARGC1A/CD40/ADM/S100A9/CXCL6/CX3CL1/ICAM1/KCNJ8/NOD2/NR1H4/XBP1/CCL2/LILRB1/PCK1/GJA1/MIR21/PTAFR/CD274/SPARC/SIRPA/ALAD/PF4/LOXL1/CXCL10/CXCL11/TNFRSF1B/CD86/THBD/PDE4B/CLDN1/PDCD4/CXCL13/TFPI/IL10RA/EDN1/VIM/CEBPB/MAPKAPK2/JAK2/ASS1/CD80/KMO/NOS2/PTGES/SGMS1/RIPK2/DEFA6/CD180/LY96/CSF2RB/MALT1/SOD2/DEFA5/SLPI/DUSP10/IL24/TLR2/CCR7/LTF/DCN/CD36/IL1A/HCK/PLCG2/NLRP7/CYP27B1/HPGD/CARD8/LTA/LILRA2/GJB2/CXCL5/CD14/GGT5/TNF/C5AR1/FOS/PTGFR/NFKBIA/WNT5A/SELE/ZFP36/IL6/SERPINE1/S100A7/ADAM9/TNFAIP3/CCR5/IRF8/TLR4/MGST1/STAP1/PPBP/LY86/CSF3/FMO1/CPS1 115

BP GO:0002237 response to molecule of bacterial origin 119/2416 346/18862 1.58919726148675e-25 9.471615678461e-23 6.59935073322654e-23 CXCL1/IRAK3/CXCL3/S100A8/CD55/VCAM1/FGFR2/TNIP3/CASP1/CXCL9/CXCL2/LYN/IDO1/PCK2/IL1B/SELP/DMBT1/LILRB2/ZC3H12A/PPARGC1A/CD40/ADM/S100A9/CXCL6/CX3CL1/ICAM1/KCNJ8/NOD2/NR1H4/XBP1/CCL2/LILRB1/PCK1/GJA1/MIR21/PTAFR/CD274/SPARC/SIRPA/ALAD/PF4/LOXL1/CXCL10/CXCL11/TNFRSF1B/CD86/THBD/PDE4B/CLDN1/PDCD4/CXCL13/TFPI/IL10RA/EDN1/VIM/CEBPB/MAPKAPK2/FZD5/JAK2/ASS1/CD80/KMO/NOS2/PTGES/SGMS1/RIPK2/DEFA6/CD180/LY96/CSF2RB/MALT1/FCGR2B/SOD2/DEFA5/SLPI/DUSP10/IL24/TLR2/CCR7/LTF/DCN/TLR1/CD36/IL1A/HCK/PLCG2/NLRP7/CYP27B1/HPGD/CARD8/LTA/LILRA2/GJB2/CXCL5/CD14/GGT5/TNF/C5AR1/FOS/PTGFR/NFKBIA/WNT5A/SELE/ZFP36/IL6/SERPINE1/S100A7/ADAM9/TNFAIP3/CCR5/IRF8/TLR4/MGST1/STAP1/PPBP/LY86/CSF3/FMO1/CPS1 119

BP GO:1903037 regulation of leukocyte cell-cell adhesion 115/2416 330/18862 2.91613395756116e-25 1.58001439882405e-22 1.10087545096448e-22 VNN1/CD55/VCAM1/THY1/LYN/IDO1/HLA-DRB1/IL1B/ANXA1/TWSG1/SELP/LILRB2/ZC3H12A/NFKBIZ/LAX1/ICAM1/ITGB2/NOD2/CD44/XBP1/CCL2/LILRB1/PCK1/FYN/MIR21/PTAFR/LAPTM5/IRF1/SOCS1/CD274/SIRPA/PTPRC/TNFSF13B/CTLA4/IL7R/CD74/SASH3/HLA-DRA/CD86/VAV1/ICOS/TIGIT/PAG1/IL2RA/CEBPB/CORO1A/IL12RB1/HLA-DMB/BTN2A2/EGR3/ASS1/CR1/CD80/RIPK2/LEF1/MAP3K8/ADA/CAV1/RHOH/DOCK8/CD27/ETS1/TNFAIP8L2/HHLA2/CD5/CD83/MALT1/LCK/PLA2G2D/IHH/CCL21/FCGR2B/NCKAP1L/DUSP10/CCL19/LRRC32/CCR7/AIF1/IL27RA/TNFSF9/LGALS1/RUNX3/LILRB4/NR4A3/IL23A/CD160/IL1A/HLA-DPA1/CRTAM/BCL6/TNFSF11/CD300A/PNP/PRKCQ/SMAD7/HLA-DPB1/NRARP/ITGA4/TNF/EBI3/PTPN6/CD1D/CD3E/ST3GAL4/LAG3/SIRPB1/SKAP1/SELE/IL6/KLF4/RASAL3/IFNG/PRKAR1A/DTX1/CXCL12 115

BP GO:1903039 positive regulation of leukocyte cell-cell adhesion 91/2416 234/18862 4.30085777039416e-24 2.1360926926291e-21 1.48832314949166e-21 VNN1/CD55/VCAM1/THY1/LYN/HLA-DRB1/IL1B/ANXA1/SELP/LILRB2/NFKBIZ/ICAM1/ITGB2/NOD2/CD44/XBP1/CCL2/LILRB1/PCK1/FYN/MIR21/PTAFR/SOCS1/CD274/SIRPA/PTPRC/TNFSF13B/CTLA4/IL7R/CD74/SASH3/HLA-DRA/CD86/VAV1/ICOS/IL2RA/CORO1A/IL12RB1/HLA-DMB/EGR3/CR1/CD80/RIPK2/LEF1/MAP3K8/ADA/CAV1/RHOH/DOCK8/CD27/ETS1/HHLA2/CD5/CD83/MALT1/LCK/IHH/CCL21/NCKAP1L/DUSP10/CCL19/CCR7/AIF1/IL27RA/TNFSF9/LGALS1/RUNX3/LILRB4/NR4A3/IL23A/CD160/IL1A/HLA-DPA1/BCL6/TNFSF11/PNP/PRKCQ/HLA-DPB1/ITGA4/TNF/EBI3/PTPN6/CD1D/CD3E/ST3GAL4/SIRPB1/SKAP1/SELE/IL6/RASAL3/IFNG 91

BP GO:0030595 leukocyte chemotaxis 88/2416 226/18862 2.19211989732372e-23 9.46467213274158e-21 6.59451281590702e-21 CXCL1/CXCL3/S100A8/CXCL9/CXCL2/EDN2/LYN/CCL11/GREM1/ANXA1/PADI2/GPR183/BSG/S100A9/CXCL6/CX3CL1/CH25H/ITGB2/NOD2/CCL2/VEGFC/RAC2/PPIB/CCL18/VAV3/CD74/PF4/CXCL10/CXCL11/PDE4B/VAV1/SLAMF8/CXCL13/CCL20/EDN1/CCR6/GPSM3/CORO1A/CCL22/CSF3R/EDN3/CCL4/CALR/RARRES2/CXCR2/MMP28/S100A12/FCER1G/PLA2G7/DAPK2/CXCR4/CXCL16/CCL21/NCKAP1L/CXCL17/CCL19/CCR7/AIF1/S1PR1/PREX1/MIF/CSF1R/IL23A/CCL13/PIK3CD/CCR1/TNFSF11/C3AR1/SWAP70/CXCL5/CXCR1/TRPM4/C5AR1/WNT5A/CKLF/IL6/SERPINE1/S100A7/F2RL1/CCR5/CXADR/STAP1/PPBP/MST1/C10orf99/FPR2/CXCL12/CHGA 88

BP GO:0002697 regulation of immune effector process 140/2416 465/18862 2.22324513185205e-23 9.46467213274158e-21 6.59451281590702e-21 IRAK3/CD55/C2/MMP12/C4BPB/CFB/PARP9/LYN/IGKC/FGR/SERPING1/HLA-DRB1/CFP/IL1B/TRAF3IP2/C3/ANXA1/SLC7A5/SPHK2/SEC14L1/ZC3H12A/CD40/SERPINB9/C1R/STAT1/NFKBIZ/IGLV2-23/CXCL6/IGLV3-19/ICAM1/ITGB2/NOD2/XBP1/LILRB1/PCK1/MIR21/AIM2/PTAFR/LAPTM5/PTPRC/IL33/RAC2/IGLV1-44/CADM1/MR1/IL7R/SLAMF6/CD74/SASH3/MICB/HLA-DRA/TNFRSF1B/CD86/IL18R1/HTRA1/VAV1/CFHR2/SLAMF8/IL2RA/IL13RA2/FZD5/CFI/IL12RB1/HLA-DMB/C1S/CR1/CD80/APPL2/NOS2/SH2D1A/RIPK2/RASGRP1/BTK/STXBP1/IGLV6-57/CLU/APOBEC3G/C4BPA/IGHG1/CLCF1/MALT1/SPINK5/FCGR2B/MAD2L2/DUSP10/IGKV3-20/IGKV4-1/CD1C/CCL19/FCRL3/IL27RA/IL1R1/LILRB4/NR4A3/IGHV1-69/WAS/CD36/IL23A/MAVS/CD160/TYROBP/TNFSF13/IRF4/CD19/PKN1/LTA/CRTAM/BCL6/BST2/C3AR1/CD300A/SMAD7/ENPP3/DDX21/TNF/TRPM4/C5AR1/PTPN6/WNT5A/TSPAN6/CD1D/CD22/LAG3/IL6/CD1A/F2RL1/IL18RAP/TNFAIP3/TRIL/AZGP1/IGKV1-5/IFNG/CR2/CD1B/TLR4/STAP1/FOXF1/ZDHHC11/KLK7/CD177 140

BP GO:0060326 cell chemotaxis 106/2416 306/18862 3.83512669589874e-23 1.5238236738371e-20 1.06172454844355e-20 CXCL1/CXCL3/SEMA5A/S100A8/VCAM1/CXCL9/CXCL2/EDN2/LYN/CCL11/GREM1/ANXA1/DEFB4A/PADI2/GPR183/BSG/S100A9/CXCL6/CX3CL1/CH25H/ITGB2/NOD2/CCL2/VEGFC/RAC2/PPIB/CCL18/VAV3/GAB1/PDGFRB/CD74/PF4/CXCL10/CXCL11/PDE4B/VAV1/SLAMF8/CXCL13/CCL20/EDN1/CCR6/GPSM3/CORO1A/CCL22/CSF3R/EGR3/EDN3/CCL4/CALR/RARRES2/LEF1/RAB13/CXCR2/MMP28/S100A12/KDR/FCER1G/ABCC1/PLA2G7/DAPK2/CXCR4/CXCL16/CCL21/HGF/NCKAP1L/CXCL17/CCL19/CCR7/AIF1/CXCR6/S1PR1/EPHA2/PREX1/MIF/CSF1R/IL23A/CCL13/PIK3CD/FGF2/CCR1/TNFSF11/C3AR1/SWAP70/CXCL5/PRKCQ/P2RX4/CXCR1/TRPM4/C5AR1/WNT5A/CKLF/IL6/SERPINE1/S100A7/F2RL1/HOXB9/CCR5/CXADR/STAP1/PPBP/MST1/C10orf99/CCR3/FPR2/CXCL12/CHGA 106

BP GO:0050863 regulation of T cell activation 109/2416 327/18862 3.0270612892792e-22 1.1275803302565e-19 7.8564189382937e-20 VNN1/CD55/VCAM1/THY1/LYN/IDO1/HLA-DRB1/IL1B/ANXA1/TWSG1/LILRB2/ZC3H12A/NFKBIZ/LAX1/NOD2/XBP1/CCL2/LILRB1/PCK1/FYN/MIR21/LAPTM5/IRF1/SOCS1/CD274/SIRPA/PTPRC/TNFSF13B/RAC2/CTLA4/IL7R/CD74/SASH3/HLA-DRA/TNFRSF1B/CD86/VAV1/ICOS/TIGIT/PAG1/CD2/IL2RA/CEBPB/CORO1A/PRDM1/IL12RB1/HLA-DMB/BTN2A2/EGR3/CR1/TNFSF8/CD80/RIPK2/LEF1/MAP3K8/ADA/CAV1/RHOH/DOCK8/CD27/TNFAIP8L2/HHLA2/CD5/CD83/MALT1/LCK/PLA2G2D/IHH/SPINK5/CCL21/FCGR2B/NCKAP1L/DUSP10/CCL19/LRRC32/CCR7/AIF1/IL27RA/TNFSF9/LGALS1/RUNX3/LILRB4/IL23A/CD160/IL1A/HLA-DPA1/IRF4/CRTAM/BCL6/TNFSF11/CD300A/PNP/PRKCQ/SMAD7/HLA-DPB1/NRARP/EBI3/SIT1/PTPN6/CD1D/CD3E/LAG3/SIRPB1/SH3RF1/IL6/RASAL3/IFNG/PRKAR1A/DTX1 109

BP GO:0097529 myeloid leukocyte migration 82/2416 218/18862 9.34335755769369e-21 3.27567123787379e-18 2.28232480279267e-18 CXCL1/CXCL3/S100A8/CXCL9/CXCL2/EDN2/LYN/PECAM1/CCL11/GREM1/ANXA1/BSG/S100A9/CXCL6/CX3CL1/ITGB2/NOD2/CCL2/VEGFC/SIRPA/RAC2/PPIB/CCL18/VAV3/CD74/PF4/CXCL10/CXCL11/PDE4B/VAV1/SLAMF8/CXCL13/CCL20/EDN1/CCL22/CSF3R/EDN3/CCL4/RARRES2/CXCR2/RHOH/MMP28/S100A12/FCER1G/PLA2G7/DAPK2/CCL21/NCKAP1L/CXCL17/CCL19/CCR7/AIF1/IL1R1/PREX1/MIF/CSF1R/IL23A/CCL13/PIK3CD/CCR1/TNFSF11/MMP14/C3AR1/CD300A/SWAP70/CXCL5/MCOLN2/P2RX4/CXCR1/C5AR1/CKLF/IL6/SERPINE1/S100A7/CXADR/STAP1/PPBP/MST1/FPR2/CXCL12/CD177/CHGA 82

BP GO:1903131 mononuclear cell differentiation 123/2416 411/18862 1.97208689474806e-20 6.5297988292769e-18 4.54963906419947e-18 VNN1/IFI16/VCAM1/LYN/HLA-DRB1/IL1B/ANXA1/EOMES/LILRB2/ZC3H12A/GPR183/NFKBIZ/PPARG/XBP1/LILRB1/PCK1/MIR21/NHEJ1/IRF1/SOCS1/PTPRC/HOXA7/CTLA4/MR1/MT1G/SEMA4A/CD79A/IL7R/SLAMF6/CD74/SASH3/HLA-DRA/CD86/IL18R1/VAV1/SLAMF8/CD2/IL2RA/DOCK11/CEBPB/BATF3/CCR6/FZD5/PRDM1/IL12RB1/EGR3/CR1/TNFSF8/CD80/ST3GAL1/RIPK2/LEF1/STAT3/BTK/ADA/RHOH/HMGB3/CD27/FCER1G/ITK/CMTM7/EGR1/CD83/CLCF1/MALT1/LCK/IKZF1/PLA2G2D/IHH/SPINK5/FCGR2B/NCKAP1L/DUSP10/POU2AF1/CCL19/CCR7/FCRL3/TNFSF9/CD3D/LGALS1/PREX1/RUNX3/SPI1/LILRB4/CSF1R/IL23A/IL1A/PLCG2/IRF4/HHEX/PIK3CD/CD19/MS4A1/CRTAM/BCL6/MMP14/BATF2/BATF/CD3G/PNP/DNAJB9/MAFB/TMEM98/SMAD7/NRARP/ITGA4/PTPN6/CD8A/CD1D/CD3E/LY9/LAG3/SH3RF1/INHBA/IL6/ITM2A/F2RL1/IFNG/CR2/IRF8/DTX1/TCIRG1/IL11 123

BP GO:0002683 negative regulation of immune system process 121/2416 403/18862 3.01743087458566e-20 9.46520421712133e-18 6.59488354583957e-18 IRAK3/CD55/IFI16/MMP12/C4BPB/THY1/LYN/IDO1/FGR/SERPING1/HLA-DRB1/GREM1/ANXA1/TWSG1/SEC14L1/LILRB2/ZC3H12A/GBP1/PADI2/PIAS3/SERPINB9/CX3CL1/CST7/PPARG/LAX1/NOD2/CCL2/LILRB1/MIR21/LAPTM5/IRF1/SOCS1/CD274/UBASH3B/PTPRC/LST1/IL33/HOXA7/CTLA4/LILRB3/FBN1/IL7R/SYT11/CD74/MICB/MNDA/CD86/HTRA1/COL3A1/SLAMF8/TIGIT/PAG1/IL2RA/LRFN5/CEBPB/IL13RA2/BTN2A2/CR1/CD80/SH2D1A/HLA-DOB/BTK/ADA/GPR137B/MMP28/C4BPA/HMGB3/SAMSN1/TNFAIP8L2/NMI/PLA2G2D/IHH/SPINK5/CCL21/FCGR2B/NME1/DUSP10/BANK1/LRRC32/FCRL3/IL27RA/WASL/LTF/RUNX3/LILRB4/MIF/BMP5/CD160/TYROBP/PKN1/CRTAM/BCL6/BST2/CD300LF/CD300A/NLRC5/MAFB/NLRC3/TRAFD1/PARP14/SMAD7/ENPP3/NRARP/TNF/FBXW7/TBC1D10C/PTPN6/TSPAN6/CD22/LAG3/INHBA/TNFAIP3/ADCYAP1/FCRLB/TLR4/APOD/STAP1/FOXF1/PRKAR1A/DTX1/CXCL12 121

BP GO:0070661 leukocyte proliferation 102/2416 312/18862 3.39192946292164e-20 1.01079497995065e-17 7.0427167006452e-18 CD55/VCAM1/MSN/LYN/IDO1/HLA-DRB1/IL1B/GREM1/ANXA1/TWSG1/LILRB2/CD40/GPR183/CX3CL1/LILRB1/FYN/MIR21/IRF1/CD274/BTN3A1/PTPRC/TNFSF13B/LST1/IL33/RAC2/CTLA4/CD79A/IL7R/VAV3/CD74/SASH3/TNFRSF1B/MNDA/CD86/CD38/IL2RA/CEBPB/CORO1A/IL12RB1/HLA-DMB/BTN2A2/CR1/TNFSF8/CD80/RIPK2/LEF1/RASGRP1/BTK/ADA/CLU/CD180/DOCK8/HHLA2/CLCF1/MALT1/PLA2G2D/IHH/FCGR2B/NCKAP1L/CCL19/LRRC32/FCRL3/AIF1/IL27RA/TNFSF9/LILRB4/MIF/CSF1R/IL23A/IL1A/TYROBP/HLA-DPA1/ELF4/HHEX/CD19/PKN1/MS4A1/CRTAM/BCL6/BST2/TNFSF11/CD300A/PNP/PRKCQ/ENPP3/HLA-DPB1/EBI3/PTPN6/CD1D/CD3E/CD22/SH3RF1/IL6/F2RL1/TNFAIP3/RASAL3/CR2/TLR4/GAPT/PRKAR1A/TCIRG1/AHR 102

BP GO:0030098 lymphocyte differentiation 111/2416 358/18862 7.48293302921311e-20 2.12372765971953e-17 1.47970780953613e-17 VNN1/VCAM1/HLA-DRB1/IL1B/ANXA1/EOMES/LILRB2/ZC3H12A/GPR183/NFKBIZ/XBP1/PCK1/MIR21/NHEJ1/IRF1/SOCS1/PTPRC/CTLA4/MR1/SEMA4A/CD79A/IL7R/SLAMF6/CD74/SASH3/HLA-DRA/CD86/IL18R1/VAV1/SLAMF8/CD2/IL2RA/DOCK11/CCR6/FZD5/PRDM1/IL12RB1/EGR3/CR1/TNFSF8/CD80/ST3GAL1/RIPK2/LEF1/STAT3/BTK/ADA/RHOH/HMGB3/CD27/FCER1G/ITK/CMTM7/EGR1/CD83/CLCF1/MALT1/LCK/IKZF1/PLA2G2D/IHH/SPINK5/FCGR2B/NCKAP1L/DUSP10/POU2AF1/CCL19/CCR7/FCRL3/TNFSF9/CD3D/LGALS1/PREX1/RUNX3/SPI1/LILRB4/IL23A/IL1A/PLCG2/IRF4/HHEX/PIK3CD/CD19/MS4A1/CRTAM/BCL6/MMP14/BATF/CD3G/PNP/DNAJB9/MAFB/TMEM98/SMAD7/NRARP/ITGA4/PTPN6/CD8A/CD1D/CD3E/LY9/LAG3/SH3RF1/INHBA/IL6/ITM2A/IFNG/CR2/DTX1/TCIRG1/IL11 111

BP GO:0050870 positive regulation of T cell activation 79/2416 212/18862 9.31305544110983e-20 2.52299138313703e-17 1.75789491460183e-17 VNN1/CD55/VCAM1/THY1/LYN/HLA-DRB1/IL1B/ANXA1/LILRB2/NFKBIZ/NOD2/XBP1/CCL2/LILRB1/PCK1/FYN/MIR21/SOCS1/CD274/SIRPA/PTPRC/TNFSF13B/CTLA4/IL7R/CD74/SASH3/HLA-DRA/CD86/VAV1/ICOS/IL2RA/CORO1A/IL12RB1/HLA-DMB/EGR3/CR1/CD80/RIPK2/LEF1/MAP3K8/ADA/CAV1/RHOH/DOCK8/CD27/HHLA2/CD5/CD83/MALT1/LCK/IHH/CCL21/NCKAP1L/DUSP10/CCL19/CCR7/AIF1/IL27RA/TNFSF9/LGALS1/RUNX3/LILRB4/IL23A/CD160/IL1A/HLA-DPA1/BCL6/TNFSF11/PNP/PRKCQ/HLA-DPB1/EBI3/PTPN6/CD1D/CD3E/SIRPB1/IL6/RASAL3/IFNG 79

BP GO:0001819 positive regulation of cytokine production 126/2416 437/18862 2.11571765148951e-19 5.48246834907717e-17 3.81991127465727e-17 IFI16/MMP12/CASP1/RNF135/LUM/HIF1A/IDO1/FGR/ZBP1/IL1B/C3/ANXA1/SULF1/SLC7A5/LILRB2/CD40/STAT1/NOD2/XBP1/LILRB1/MIR21/AIM2/PTAFR/TWIST1/LAPTM5/IRF1/CD274/GBP5/PTPRC/IL33/CADM1/AFAP1L2/F3/SLAMF6/CD34/CD74/PF4/SASH3/MNDA/CD86/IL18R1/HEG1/IL26/PDE4B/TIGIT/CD2/CEBPB/PYHIN1/MAPKAPK2/GPSM3/FZD5/JAK2/IL12RB1/CD80/AGT/RIPK2/RASGRP1/STAT3/FCN1/CLU/HYAL2/LY96/FCER1G/HHLA2/EGR1/CD83/MALT1/SULF2/HGF/CXCL17/POU2AF1/TLR2/CCL19/CCR7/AIF1/IL27RA/IL1R1/GATA6/NR4A3/MIF/CSF1R/TLR1/CD36/IL23A/MAVS/CD160/IL1A/TYROBP/HLA-DPA1/PTGS2/PLCG2/LPL/SERPINB7/IRF4/PANX1/CARD8/NLRP1/LTA/LILRA2/CRTAM/C3AR1/MCOLN2/PRKCQ/TLR8/DDX21/HLA-DPB1/SPHK1/LTB/CD14/TNF/EBI3/C5AR1/WNT5A/CD3E/LY9/IFNGR1/IL6/SERPINE1/IGHD/F2RL1/IFNG/ADCYAP1/IRF8/TLR4/H19/OSM 126

BP GO:1990266 neutrophil migration 56/2416 123/18862 4.15440327049489e-19 1.0316768121729e-16 7.1882109219747e-17 CXCL1/CXCL3/S100A8/CXCL9/CXCL2/EDN2/PECAM1/CCL11/BSG/S100A9/CXCL6/CX3CL1/ITGB2/NOD2/CCL2/RAC2/PPIB/CCL18/VAV3/CD74/PF4/CXCL10/CXCL11/PDE4B/VAV1/SLAMF8/CXCL13/CCL20/EDN1/CCL22/CSF3R/EDN3/CCL4/CXCR2/RHOH/S100A12/FCER1G/DAPK2/CCL21/NCKAP1L/CCL19/CCR7/IL1R1/PREX1/IL23A/CCL13/PIK3CD/C3AR1/CXCL5/MCOLN2/CXCR1/C5AR1/CKLF/CXADR/PPBP/CD177 56

BP GO:0050867 positive regulation of cell activation 120/2416 412/18862 6.45533736622771e-19 1.51142795076017e-16 1.05308782510577e-16 VNN1/CD55/VCAM1/THY1/LYN/IGKC/FGR/HLA-DRB1/IL1B/ANXA1/SELP/SPHK2/LILRB2/CD40/GPR183/HAVCR1/NFKBIZ/CTSC/ITGB2/NOD2/IGHM/XBP1/CCL2/LILRB1/PCK1/FYN/MIR21/PTAFR/SOCS1/CD274/SIRPA/PTPRC/TNFSF13B/IL33/CTLA4/IL7R/VAV3/PDGFRB/CD74/SASH3/TRBC1/HLA-DRA/CD86/VAV1/ICOS/CD38/CD2/IL2RA/CORO1A/JAK2/IL12RB1/HLA-DMB/EGR3/CR1/CD80/CEBPA/RIPK2/LEF1/BTK/MAP3K8/PLEK/ADA/CAV1/STXBP1/RHOH/DOCK8/CD27/IGHG1/HHLA2/CD5/CD83/CLCF1/MALT1/LCK/IHH/CCL21/MAD2L2/NCKAP1L/DUSP10/CCL19/CCR7/FCRL3/AIF1/IL27RA/TNFSF9/LGALS1/RUNX3/LRRK2/LILRB4/NR4A3/MIF/IGHV1-69/IL23A/CD160/IL1A/TYROBP/TNFSF13/HLA-DPA1/LILRA2/BCL6/TNFSF11/MMP14/PNP/PRKCQ/HLA-DPB1/EBI3/PTPN6/WNT5A/CD1D/CD3E/SIRPB1/IL6/IGHD/F2RL1/RASAL3/IFNG/CLEC4D/TLR4/STAP1/CD177 120

BP GO:0002685 regulation of leukocyte migration 76/2416 205/18862 6.59347763754435e-19 1.51142795076017e-16 1.05308782510577e-16 THY1/EDN2/MSN/LYN/GREM1/ANXA1/SELP/PADI2/CX3CL1/ICAM1/NOD2/CCL2/VEGFC/PTAFR/IL33/RAC2/HOXA7/CD74/CXCL10/SLAMF8/CXCL13/CCL20/EDN1/CCR6/GPSM3/EDN3/CCL4/CALR/RARRES2/ADA/RHOH/MMP28/DOCK8/PLA2G7/DAPK2/MADCAM1/CCL21/NCKAP1L/CXCL17/CCL19/CCR7/AIF1/IL27RA/STK10/WASL/IL1R1/PLVAP/MIF/CSF1R/IL23A/BMP5/CCR1/MMP14/C3AR1/CD300A/SWAP70/P2RX4/ITGA4/TNF/C5AR1/ECM1/ITGA2/WNT5A/ST3GAL4/SELE/IL6/JAM2/SERPINE1/S100A7/F2RL1/APOD/STAP1/MST1/C10orf99/FPR2/CXCL12 76

BP GO:0034341 response to interferon-gamma 74/2416 197/18862 7.99282703855738e-19 1.76434256110378e-16 1.22930614686584e-16 VCAM1/IFITM3/CASP1/IFITM2/PARP9/KYNU/IFITM1/CCL11/HLA-DRB1/TRIM22/CD40/GBP1/IFI30/OAS2/STAT1/CX3CL1/PPARG/ICAM1/CD44/CCL2/SOCS3/IRF9/PTAFR/IRF1/SOCS1/GBP5/SIRPA/CCL18/CD74/HLA-DRA/GBP2/CLDN1/ZYX/CCL20/EDN1/VIM/CCL22/JAK2/FCGR1B/IL12RB1/GBP4/ASS1/CCL4/CIITA/NOS2/STXBP1/NMI/CXCL16/CCL21/TLR2/CCL19/AIF1/IRF6/WAS/HLA-DPA1/HCK/CCL13/IRF4/CYP27B1/BST2/FCGR1A/NLRC5/MT2A/PARP14/HLA-DPB1/WNT5A/IFNGR1/IFNG/IRF8/TLR4/HLA-DQB1/OASL/HSP90AB1/HLA-DQA1 74

BP GO:0097530 granulocyte migration 62/2416 148/18862 9.49472862054095e-19 2.02102080637229e-16 1.40814678225692e-16 CXCL1/CXCL3/S100A8/CXCL9/CXCL2/EDN2/PECAM1/CCL11/ANXA1/BSG/S100A9/CXCL6/CX3CL1/ITGB2/NOD2/CCL2/RAC2/PPIB/CCL18/VAV3/CD74/PF4/CXCL10/CXCL11/PDE4B/VAV1/SLAMF8/CXCL13/CCL20/EDN1/CCL22/CSF3R/EDN3/CCL4/RARRES2/CXCR2/RHOH/S100A12/FCER1G/DAPK2/CCL21/NCKAP1L/CXCL17/CCL19/CCR7/IL1R1/PREX1/CSF1R/IL23A/CCL13/PIK3CD/C3AR1/CD300A/CXCL5/MCOLN2/CXCR1/C5AR1/CKLF/S100A7/CXADR/PPBP/CD177 62

BP GO:0030593 neutrophil chemotaxis 50/2416 103/18862 1.08480656543587e-18 2.22946452758544e-16 1.55338000023394e-16 CXCL1/CXCL3/S100A8/CXCL9/CXCL2/EDN2/CCL11/BSG/S100A9/CXCL6/CX3CL1/ITGB2/NOD2/CCL2/RAC2/PPIB/CCL18/VAV3/CD74/PF4/CXCL10/CXCL11/PDE4B/VAV1/CXCL13/CCL20/EDN1/CCL22/CSF3R/EDN3/CCL4/CXCR2/S100A12/FCER1G/DAPK2/CCL21/NCKAP1L/CCL19/CCR7/PREX1/IL23A/CCL13/PIK3CD/C3AR1/CXCL5/CXCR1/C5AR1/CKLF/CXADR/PPBP 50

BP GO:0071219 cellular response to molecule of bacterial origin 76/2416 209/18862 2.41516092122402e-18 4.79811969683171e-16 3.34309116990482e-16 CXCL1/CXCL3/CD55/TNIP3/CASP1/CXCL9/CXCL2/LYN/IL1B/LILRB2/ZC3H12A/PPARGC1A/CD40/CXCL6/CX3CL1/ICAM1/NOD2/NR1H4/XBP1/CCL2/LILRB1/MIR21/PTAFR/CD274/SIRPA/PF4/CXCL10/CXCL11/TNFRSF1B/CD86/PDE4B/PDCD4/CXCL13/TFPI/VIM/CEBPB/FZD5/ASS1/CD80/KMO/NOS2/SGMS1/RIPK2/DEFA6/CD180/LY96/MALT1/FCGR2B/DEFA5/IL24/TLR2/LTF/TLR1/CD36/IL1A/HCK/NLRP7/CARD8/LILRA2/CXCL5/CD14/TNF/NFKBIA/WNT5A/ZFP36/IL6/SERPINE1/ADAM9/TNFAIP3/CCR5/IRF8/TLR4/STAP1/PPBP/LY86/CSF3 76

BP GO:0071222 cellular response to lipopolysaccharide 73/2416 197/18862 3.3455428399151e-18 6.43207591157871e-16 4.4815505954041e-16 CXCL1/CXCL3/CD55/TNIP3/CASP1/CXCL9/CXCL2/LYN/IL1B/LILRB2/ZC3H12A/PPARGC1A/CD40/CXCL6/CX3CL1/ICAM1/NOD2/NR1H4/XBP1/CCL2/LILRB1/MIR21/PTAFR/CD274/SIRPA/PF4/CXCL10/CXCL11/TNFRSF1B/CD86/PDE4B/PDCD4/CXCL13/TFPI/VIM/CEBPB/ASS1/CD80/KMO/NOS2/SGMS1/RIPK2/DEFA6/CD180/LY96/MALT1/DEFA5/IL24/TLR2/LTF/CD36/IL1A/HCK/NLRP7/CARD8/LILRA2/CXCL5/CD14/TNF/NFKBIA/WNT5A/ZFP36/IL6/SERPINE1/ADAM9/TNFAIP3/CCR5/IRF8/TLR4/STAP1/PPBP/LY86/CSF3 73

BP GO:0030217 T cell differentiation 84/2416 246/18862 3.63218036569489e-18 6.76493593110673e-16 4.71347090219287e-16 VNN1/HLA-DRB1/IL1B/ANXA1/EOMES/LILRB2/ZC3H12A/GPR183/NFKBIZ/XBP1/PCK1/MIR21/NHEJ1/IRF1/SOCS1/PTPRC/CTLA4/MR1/SEMA4A/IL7R/SLAMF6/CD74/SASH3/HLA-DRA/CD86/IL18R1/VAV1/CD2/IL2RA/CCR6/FZD5/PRDM1/IL12RB1/EGR3/CR1/TNFSF8/CD80/RIPK2/LEF1/STAT3/ADA/RHOH/CD27/FCER1G/ITK/EGR1/CD83/MALT1/LCK/PLA2G2D/IHH/SPINK5/NCKAP1L/DUSP10/CCL19/CCR7/TNFSF9/CD3D/PREX1/RUNX3/LILRB4/IL23A/IL1A/IRF4/PIK3CD/CRTAM/BCL6/BATF/CD3G/PNP/MAFB/TMEM98/SMAD7/NRARP/CD8A/CD1D/CD3E/LY9/LAG3/SH3RF1/IL6/IFNG/DTX1/TCIRG1 84

BP GO:0071621 granulocyte chemotaxis 55/2416 124/18862 3.76481563038318e-18 6.79948519911629e-16 4.73754311383147e-16 CXCL1/CXCL3/S100A8/CXCL9/CXCL2/EDN2/CCL11/ANXA1/BSG/S100A9/CXCL6/CX3CL1/ITGB2/NOD2/CCL2/RAC2/PPIB/CCL18/VAV3/CD74/PF4/CXCL10/CXCL11/PDE4B/VAV1/CXCL13/CCL20/EDN1/CCL22/CSF3R/EDN3/CCL4/RARRES2/CXCR2/S100A12/FCER1G/DAPK2/CCL21/NCKAP1L/CXCL17/CCL19/CCR7/PREX1/CSF1R/IL23A/CCL13/PIK3CD/C3AR1/CXCL5/CXCR1/C5AR1/CKLF/S100A7/CXADR/PPBP 55

BP GO:0050727 regulation of inflammatory response 109/2416 366/18862 4.52074722431897e-18 7.92460395792384e-16 5.52146990710165e-16 MMP3/DUOXA2/S100A8/PLA2G2A/CASP1/C2CD4A/CASP4/TGM2/MMP9/LYN/IDO1/ZBP1/HLA-DRB1/IL1B/BIRC3/C3/ANXA1/DUOXA1/OSMR/NFKBIZ/S100A9/CX3CL1/CST7/PPARG/CTSC/NOD2/NR1H4/SOCS3/MIR21/SIRPA/PTPRC/IL33/SYT11/TNFRSF1B/C2CD4B/TEK/CDH5/PDCD4/SLAMF8/ZYX/IL2RA/LRFN5/CEBPB/GPSM3/JAK2/AGT/LRRC19/CEBPA/PTGES/SERPINF1/BTK/ADA/HYAL2/S100A12/ETS1/ABCC1/TNFAIP8L2/PLA2G7/NMI/PLA2G2D/FCGR2B/HGF/DUSP10/CXCL17/TLR2/PIK3AP1/SPATA2/CCR7/IL1R1/LRRK2/IL23A/GPR4/HCK/PTGS2/LPL/MGLL/TNFAIP6/NLRP1/LTA/BCL6/TNFSF11/NAPEPLD/NLRC3/ENPP3/SPHK1/TNF/NFKBIA/ITGA2/WNT5A/KLKB1/IFI35/CALCRL/ADAMTS12/TLR10/SELE/IL6/SERPINE1/TNFAIP3/USP18/KLF4/IFNG/FABP4/ADCYAP1/TLR4/STAP1/FOXF1/OSM/FPR2/CASP5 109

BP GO:0044282 small molecule catabolic process 121/2416 431/18862 1.1206991638708e-17 1.90839057619142e-15 1.32967163953994e-15 APOBEC3B/TAT/ACOX1/AMACR/PHYH/INPP5J/RBKS/DHDH/ACADS/CPT1A/ACOX2/ETFDH/ACOT8/LDHD/KYNU/ABAT/CBS/CYP4F2/IDO1/ABCB11/LPIN1/GLUL/PCK2/CPT2/ENTPD5/IMPA2/CBR3/CROT/IRS1/ACAT1/MT3/DDAH2/PGM2L1/SULT1A2/ENTPD1/PGM1/ASRGL1/ACAA1/DAO/PCK1/MIR21/OTC/TWIST1/TDO2/ACAA2/BDH1/BDH2/ACOT4/CRAT/BPNT1/CYP4F12/MLYCD/HMGCL/SULT1A1/GLYCTK/ALDH5A1/CRYL1/ALDH6A1/PECR/EHHADH/DECR2/TST/CYP27A1/HADH/MPST/HNMT/HIBCH/MGAT1/KMO/NOS2/ECH1/SORD/SRD5A3/PFKFB2/ADA/DDO/APOBEC3G/OCRL/NAGK/GALM/PPM1K/FUT8/AMT/AUH/ACADM/FAAH/SHMT2/HADHA/PGD/SDSL/GOT1/BCAT1/ABCD3/ABHD3/AKR1B10/FUT1/CYP27B1/SLC27A4/ACADSB/FABP1/DERA/CTH/ASPA/PNP/SULT1B1/SLC27A2/IL4I1/BCKDHB/GPT/ETFA/TYMP/DCXR/ENO2/AKR1C3/IDO2/ALDOB/PON3/XDH/HDC/ALDH1A1/CRYM 121

BP GO:0070663 regulation of leukocyte proliferation 82/2416 241/18862 1.16494051357394e-17 1.92862373913907e-15 1.34376910118397e-15 CD55/VCAM1/LYN/IDO1/HLA-DRB1/IL1B/GREM1/ANXA1/TWSG1/LILRB2/CD40/GPR183/LILRB1/MIR21/IRF1/CD274/PTPRC/TNFSF13B/LST1/IL33/RAC2/CTLA4/VAV3/CD74/SASH3/TNFRSF1B/MNDA/CD86/CD38/IL2RA/CEBPB/CORO1A/IL12RB1/HLA-DMB/BTN2A2/CR1/TNFSF8/CD80/RIPK2/BTK/ADA/HHLA2/CLCF1/PLA2G2D/IHH/FCGR2B/NCKAP1L/CCL19/LRRC32/FCRL3/AIF1/IL27RA/TNFSF9/LILRB4/MIF/CSF1R/IL23A/IL1A/TYROBP/HLA-DPA1/HHEX/PKN1/CRTAM/BCL6/BST2/CD300A/PNP/PRKCQ/ENPP3/HLA-DPB1/EBI3/PTPN6/CD1D/CD3E/CD22/SH3RF1/IL6/TNFAIP3/RASAL3/TLR4/PRKAR1A/AHR 82

BP GO:0002696 positive regulation of leukocyte activation 115/2416 401/18862 1.28354708675972e-17 2.06755152353728e-15 1.44056707176873e-15 VNN1/CD55/VCAM1/THY1/LYN/IGKC/FGR/HLA-DRB1/IL1B/ANXA1/SPHK2/LILRB2/CD40/GPR183/HAVCR1/NFKBIZ/CTSC/ITGB2/NOD2/IGHM/XBP1/CCL2/LILRB1/PCK1/FYN/MIR21/PTAFR/SOCS1/CD274/SIRPA/PTPRC/TNFSF13B/IL33/CTLA4/IL7R/VAV3/CD74/SASH3/TRBC1/HLA-DRA/CD86/VAV1/ICOS/CD38/CD2/IL2RA/CORO1A/IL12RB1/HLA-DMB/EGR3/CR1/CD80/CEBPA/RIPK2/LEF1/BTK/MAP3K8/ADA/CAV1/STXBP1/RHOH/DOCK8/CD27/IGHG1/HHLA2/CD5/CD83/CLCF1/MALT1/LCK/IHH/CCL21/MAD2L2/NCKAP1L/DUSP10/CCL19/CCR7/FCRL3/AIF1/IL27RA/TNFSF9/LGALS1/RUNX3/LRRK2/LILRB4/NR4A3/MIF/IGHV1-69/IL23A/CD160/IL1A/TYROBP/TNFSF13/HLA-DPA1/BCL6/TNFSF11/MMP14/PNP/PRKCQ/HLA-DPB1/EBI3/PTPN6/WNT5A/CD1D/CD3E/SIRPB1/IL6/IGHD/F2RL1/RASAL3/IFNG/CLEC4D/TLR4/STAP1/CD177 115

BP GO:0002699 positive regulation of immune effector process 77/2416 219/18862 1.36280794947232e-17 2.13745667864605e-15 1.48927350711033e-15 LYN/FGR/HLA-DRB1/IL1B/C3/ANXA1/SLC7A5/SPHK2/CD40/NFKBIZ/ITGB2/NOD2/XBP1/LILRB1/PCK1/MIR21/PTAFR/LAPTM5/PTPRC/IL33/RAC2/CADM1/MR1/SLAMF6/CD74/SASH3/HLA-DRA/CD86/IL18R1/VAV1/IL13RA2/FZD5/IL12RB1/HLA-DMB/CR1/CD80/APPL2/NOS2/SH2D1A/RIPK2/RASGRP1/BTK/STXBP1/CLCF1/MALT1/MAD2L2/CD1C/CCL19/IL1R1/NR4A3/CD36/IL23A/MAVS/CD160/TYROBP/TNFSF13/LTA/CRTAM/CD300A/ENPP3/DDX21/TNF/WNT5A/CD1D/LAG3/IL6/CD1A/F2RL1/IL18RAP/AZGP1/IFNG/CD1B/TLR4/STAP1/FOXF1/KLK7/CD177 77

BP GO:0071216 cellular response to biotic stimulus 80/2416 233/18862 1.58738440926056e-17 2.42584899466486e-15 1.69021092969849e-15 CXCL1/CXCL3/CD55/TNIP3/HSPA5/CASP1/CXCL9/CXCL2/LYN/IL1B/LILRB2/ZC3H12A/PPARGC1A/CD40/CXCL6/CX3CL1/ICAM1/NOD2/NR1H4/XBP1/CCL2/LILRB1/MIR21/PTAFR/CD274/SIRPA/PF4/CXCL10/CXCL11/TNFRSF1B/CD86/PDE4B/PDCD4/CXCL13/TFPI/VIM/CEBPB/FZD5/ASS1/CD80/KMO/NOS2/SGMS1/RIPK2/BTK/DEFA6/CD180/LY96/MALT1/FCGR2B/DEFA5/IGFBPL1/IL24/TLR2/LTF/WFS1/TLR1/CD36/IL1A/HCK/NLRP7/CARD8/LILRA2/CXCL5/CD14/TNF/NFKBIA/WNT5A/ZFP36/IL6/SERPINE1/ADAM9/TNFAIP3/CCR5/IRF8/TLR4/STAP1/PPBP/LY86/CSF3 80

BP GO:0002460 adaptive immune response based on somatic recombination of immune receptors built from immunoglobulin superfamily domains 108/2416 367/18862 1.67584382135474e-17 2.49700729381856e-15 1.73979049348538e-15 CD55/BTN3A3/C2/C4BPB/IGKC/SERPING1/HLA-DRB1/IL1B/C3/ANXA1/CTSH/ZC3H12A/CD40/C1R/NFKBIZ/IGLV2-23/IGLV3-19/CTSC/ICAM1/NOD2/IGHM/LILRB1/MIR21/CD274/PTPRC/TNFSF13B/IL33/IGLV1-44/MR1/SEMA4A/IL7R/SLAMF6/CD74/SASH3/TRBC1/HLA-DRA/TNFRSF1B/IL18R1/CXCL13/RFTN1/IL13RA2/CCR6/FZD5/CFI/IL12RB1/C1S/CR1/CD80/RIPK2/LEF1/STAT3/BTK/ADA/IGLV6-57/CLU/C4BPA/CD27/FCER1G/KLHL6/IGHG1/BTN3A2/CLCF1/MALT1/FCGR2B/MAD2L2/IGKV3-20/IGKV4-1/CD1C/CCL19/IL27RA/IL1R1/LILRB4/IGHV1-69/WAS/IL23A/TNFSF13/IRF4/CD19/PKN1/LTA/BCL6/SWAP70/BATF/PRKCQ/TMEM98/SMAD7/TLR8/TNF/TRPM4/EBI3/PTPN6/PRF1/CD8A/CD1D/LY9/IL6/CD1A/IGHD/TNFAIP3/AZGP1/IGKV1-5/CR2/CD1B/TLR4/HLA-DQB1/GAPT/TCIRG1/BACH2 108

BP GO:0046651 lymphocyte proliferation 90/2416 282/18862 3.19514054532757e-17 4.64464332930544e-15 3.23615647017131e-15 CD55/VCAM1/MSN/LYN/IDO1/HLA-DRB1/IL1B/ANXA1/TWSG1/LILRB2/CD40/GPR183/LILRB1/FYN/MIR21/IRF1/CD274/BTN3A1/PTPRC/TNFSF13B/LST1/RAC2/CTLA4/CD79A/IL7R/VAV3/CD74/SASH3/TNFRSF1B/MNDA/CD86/CD38/IL2RA/CEBPB/CORO1A/IL12RB1/HLA-DMB/BTN2A2/CR1/TNFSF8/CD80/RIPK2/LEF1/RASGRP1/BTK/ADA/CD180/DOCK8/HHLA2/CLCF1/MALT1/PLA2G2D/IHH/FCGR2B/NCKAP1L/CCL19/LRRC32/FCRL3/AIF1/IL27RA/TNFSF9/LILRB4/MIF/IL23A/IL1A/TYROBP/HLA-DPA1/ELF4/CD19/PKN1/MS4A1/CRTAM/BCL6/CD300A/PNP/PRKCQ/HLA-DPB1/EBI3/PTPN6/CD1D/CD3E/CD22/SH3RF1/IL6/RASAL3/CR2/TLR4/GAPT/PRKAR1A/AHR 90

BP GO:0032943 mononuclear cell proliferation 90/2416 285/18862 6.75627398378814e-17 9.58747451032794e-15 6.68007540502361e-15 CD55/VCAM1/MSN/LYN/IDO1/HLA-DRB1/IL1B/ANXA1/TWSG1/LILRB2/CD40/GPR183/LILRB1/FYN/MIR21/IRF1/CD274/BTN3A1/PTPRC/TNFSF13B/LST1/RAC2/CTLA4/CD79A/IL7R/VAV3/CD74/SASH3/TNFRSF1B/MNDA/CD86/CD38/IL2RA/CEBPB/CORO1A/IL12RB1/HLA-DMB/BTN2A2/CR1/TNFSF8/CD80/RIPK2/LEF1/RASGRP1/BTK/ADA/CD180/DOCK8/HHLA2/CLCF1/MALT1/PLA2G2D/IHH/FCGR2B/NCKAP1L/CCL19/LRRC32/FCRL3/AIF1/IL27RA/TNFSF9/LILRB4/MIF/IL23A/IL1A/TYROBP/HLA-DPA1/ELF4/CD19/PKN1/MS4A1/CRTAM/BCL6/CD300A/PNP/PRKCQ/HLA-DPB1/EBI3/PTPN6/CD1D/CD3E/CD22/SH3RF1/IL6/RASAL3/CR2/TLR4/GAPT/PRKAR1A/AHR 90

BP GO:0042119 neutrophil activation 132/2416 500/18862 9.17073579620831e-17 1.27110663593957e-14 8.8564388533762e-15 LCN2/CXCL1/S100P/LPCAT1/S100A8/VNN1/CD55/CHI3L1/S100A11/PLA2G2A/SERPINA1/STBD1/PRDX4/MMP9/PECAM1/RAB31/SERPINA3/FGR/CNN2/OLFM4/CFP/FCGR3B/C3/CTSH/LILRB2/PADI2/ANPEP/PLD1/TCN1/S100A9/CXCL6/PRDX6/CTSC/PGM1/DEGS1/ITGB2/FPR1/CD44/ITGAX/ACAA1/IQGAP2/PTAFR/ATP8A1/SIRPA/PTPRC/PLAU/LILRB3/SELL/ALAD/PLAUR/COTL1/TNFRSF1B/MNDA/CD93/STOM/PLEKHO2/SLC2A3/MME/GMFG/CEACAM6/CR1/VCP/FCN1/CXCR2/TUBB/CTSB/ITGAL/DOK3/S100A12/ARHGAP9/FCER1G/FCGR2B/NCKAP1L/SLPI/ANXA3/GLIPR1/TLR2/CLEC5A/STK10/PGRMC1/PREX1/LTF/GPR84/CTSA/MIF/CD36/SIGLEC5/TYROBP/TNFAIP6/LILRA2/BST2/C3AR1/DERA/CD300A/PNP/LRG1/LILRA3/TTR/ITGAV/CFD/CXCR1/CD14/C5AR1/TBC1D10C/PTPN6/OSCAR/TIMP2/RNASE2/HVCN1/SLC27A2/SIRPB1/S100A7/CAT/F2RL1/IL18RAP/DSP/HSPA6/CLEC4D/SERPINB3/FCGR2A/PRSS3/LYZ/CD33/MGST1/GGH/PPBP/FRK/RAB24/TCIRG1/HSP90AB1/FPR2/CD177 132

BP GO:0016054 organic acid catabolic process 84/2416 258/18862 9.61967203858896e-17 1.30302830340887e-14 9.07885315603671e-15 TAT/ACOX1/AMACR/PHYH/ACADS/CPT1A/ACOX2/ETFDH/ACOT8/LDHD/KYNU/ABAT/CBS/CYP4F2/IDO1/ABCB11/LPIN1/GLUL/PCK2/CPT2/CROT/IRS1/ACAT1/DDAH2/ASRGL1/ACAA1/DAO/PCK1/MIR21/OTC/TWIST1/TDO2/ACAA2/BDH2/ACOT4/CRAT/CYP4F12/MLYCD/HMGCL/ALDH5A1/CRYL1/ALDH6A1/PECR/EHHADH/DECR2/TST/HADH/MPST/HNMT/HIBCH/KMO/NOS2/ECH1/SORD/DDO/NAGK/PPM1K/AMT/AUH/ACADM/FAAH/SHMT2/HADHA/PGD/SDSL/GOT1/BCAT1/ABCD3/ABHD3/SLC27A4/ACADSB/FABP1/CTH/ASPA/SLC27A2/IL4I1/BCKDHB/GPT/ETFA/DCXR/IDO2/PON3/HDC/CRYM 84

BP GO:0050670 regulation of lymphocyte proliferation 75/2416 221/18862 3.36583730523416e-16 4.45786451982125e-14 3.106018285181e-14 CD55/VCAM1/LYN/IDO1/HLA-DRB1/IL1B/ANXA1/TWSG1/LILRB2/CD40/GPR183/LILRB1/MIR21/IRF1/CD274/PTPRC/TNFSF13B/LST1/RAC2/CTLA4/VAV3/CD74/SASH3/TNFRSF1B/MNDA/CD86/CD38/IL2RA/CEBPB/CORO1A/IL12RB1/HLA-DMB/BTN2A2/CR1/TNFSF8/CD80/RIPK2/BTK/ADA/HHLA2/CLCF1/PLA2G2D/IHH/FCGR2B/NCKAP1L/CCL19/LRRC32/FCRL3/AIF1/IL27RA/TNFSF9/LILRB4/MIF/IL23A/IL1A/TYROBP/HLA-DPA1/PKN1/CRTAM/BCL6/CD300A/PNP/PRKCQ/HLA-DPB1/EBI3/PTPN6/CD1D/CD3E/CD22/SH3RF1/IL6/RASAL3/TLR4/PRKAR1A/AHR 75

BP GO:0071346 cellular response to interferon-gamma 65/2416 177/18862 3.91001194961429e-16 5.06601548254373e-14 3.52974762957171e-14 VCAM1/CASP1/PARP9/CCL11/HLA-DRB1/TRIM22/GBP1/IFI30/OAS2/STAT1/CX3CL1/PPARG/ICAM1/CD44/CCL2/SOCS3/IRF9/PTAFR/IRF1/SOCS1/GBP5/SIRPA/CCL18/HLA-DRA/GBP2/CLDN1/ZYX/CCL20/EDN1/VIM/CCL22/JAK2/FCGR1B/IL12RB1/GBP4/ASS1/CCL4/CIITA/NOS2/STXBP1/NMI/CCL21/TLR2/CCL19/AIF1/IRF6/WAS/HLA-DPA1/HCK/CCL13/IRF4/FCGR1A/NLRC5/MT2A/PARP14/HLA-DPB1/WNT5A/IFNGR1/IFNG/IRF8/TLR4/HLA-DQB1/OASL/HSP90AB1/HLA-DQA1 65

BP GO:0002703 regulation of leukocyte mediated immunity 72/2416 209/18862 5.33993909163102e-16 6.77149723108955e-14 4.71804248969415e-14 C4BPB/LYN/FGR/HLA-DRB1/IL1B/C3/SPHK2/CD40/SERPINB9/CXCL6/ICAM1/ITGB2/NOD2/LILRB1/PTAFR/PTPRC/RAC2/CADM1/MR1/IL7R/SLAMF6/SASH3/HLA-DRA/TNFRSF1B/IL18R1/VAV1/IL13RA2/FZD5/IL12RB1/CR1/NOS2/SH2D1A/RASGRP1/BTK/STXBP1/C4BPA/CLCF1/MALT1/FCGR2B/MAD2L2/CD1C/IL27RA/IL1R1/LILRB4/WAS/IL23A/MAVS/CD160/TYROBP/TNFSF13/LTA/CRTAM/BCL6/BST2/CD300A/SMAD7/DDX21/TNF/TRPM4/PTPN6/CD1D/LAG3/IL6/CD1A/F2RL1/IL18RAP/AZGP1/CD1B/TLR4/STAP1/FOXF1/CD177 72

BP GO:0032944 regulation of mononuclear cell proliferation 75/2416 223/18862 5.88650189321191e-16 7.30907318407146e-14 5.09259867735109e-14 CD55/VCAM1/LYN/IDO1/HLA-DRB1/IL1B/ANXA1/TWSG1/LILRB2/CD40/GPR183/LILRB1/MIR21/IRF1/CD274/PTPRC/TNFSF13B/LST1/RAC2/CTLA4/VAV3/CD74/SASH3/TNFRSF1B/MNDA/CD86/CD38/IL2RA/CEBPB/CORO1A/IL12RB1/HLA-DMB/BTN2A2/CR1/TNFSF8/CD80/RIPK2/BTK/ADA/HHLA2/CLCF1/PLA2G2D/IHH/FCGR2B/NCKAP1L/CCL19/LRRC32/FCRL3/AIF1/IL27RA/TNFSF9/LILRB4/MIF/IL23A/IL1A/TYROBP/HLA-DPA1/PKN1/CRTAM/BCL6/CD300A/PNP/PRKCQ/HLA-DPB1/EBI3/PTPN6/CD1D/CD3E/CD22/SH3RF1/IL6/RASAL3/TLR4/PRKAR1A/AHR 75

BP GO:0046631 alpha-beta T cell activation 58/2416 149/18862 7.11417984615733e-16 8.6531656904281e-14 6.02909548723752e-14 CD55/HLA-DRB1/ANXA1/TWSG1/EOMES/ZC3H12A/GPR183/NFKBIZ/LILRB1/MIR21/IRF1/SOCS1/CD274/PTPRC/SEMA4A/SLAMF6/SASH3/HLA-DRA/CD86/IL18R1/PRDM1/IL12RB1/TNFSF8/CD80/RIPK2/LEF1/STAT3/ADA/ITK/CD83/MALT1/PLA2G2D/IHH/NCKAP1L/CLEC4A/CCL19/RUNX3/LILRB4/IL23A/CD160/ELF4/IRF4/CRTAM/BCL6/CD300A/BATF/PNP/PRKCQ/TMEM98/SMAD7/EBI3/CD3E/LY9/SH3RF1/IL6/RASAL3/IFNG/TCIRG1 58

BP GO:0071674 mononuclear cell migration 67/2416 190/18862 1.46388918285736e-15 1.74495590596597e-13 1.21579848976258e-13 MSN/LYN/PECAM1/CCL11/GREM1/ANXA1/PADI2/GPR183/CX3CL1/CH25H/ICAM1/SPNS2/CCL2/SIRPA/CCL18/CXCL10/CXCL11/SLAMF8/CXCL13/CCL20/CCR6/CCL22/CCL4/CALR/RARRES2/CXCR2/ITGAL/S100A12/DOCK8/PLA2G7/CXCR4/MADCAM1/CXCL16/CCL21/CXCL17/CCL19/CCR7/AIF1/IL27RA/STK10/S1PR1/WASL/CSF1R/BMP5/CCL13/PIK3CD/CRTAM/CCR1/TNFSF11/C3AR1/ITGA4/CXCR1/TNF/TRPM4/C5AR1/ECM1/WNT5A/CKLF/IL6/JAM2/SERPINE1/S100A7/CCR5/APOD/C10orf99/FPR2/CXCL12 67

BP GO:0006631 fatty acid metabolic process 108/2416 392/18862 2.69304299991283e-15 3.14716397636872e-13 2.19278733429435e-13 ACSF2/ACOX1/LIPC/AMACR/PDK2/CYP2B6/PHYH/NAAA/ACADS/PTGR1/ABHD5/CPT1A/EDN2/ACOX2/ETFDH/ACOT8/CYP4F2/ABCB11/LPIN1/PCK2/CPT2/IL1B/TBXAS1/C3/ANXA1/ZADH2/PPARGC1A/CROT/IRS1/FADS1/ACAT1/PPARG/DEGS1/ACAA1/XBP1/LPGAT1/PCK1/ACOT11/TWIST1/ACAA2/BDH2/PAM/FABP3/ACOT4/CRAT/CYP4F12/MLYCD/CD74/CRYL1/PECR/EHHADH/DECR2/HADH/EDN1/ACSS2/SCD/APPL2/CES2/PTGDS/PTGES/ECH1/CAV1/EPHX2/PDK4/GSTM4/ACSL4/AUH/SCAP/ACADM/CREM/FAAH/LIPG/HADHA/CYP3A4/CYP2J2/ABCD3/NR4A3/MIF/PDP1/ABHD3/CD36/PTGS2/LPL/MGLL/HPGD/SLC27A4/ACADSB/HPGDS/HSD17B8/FABP1/FADS3/APOC1/GGT5/GSTA1/SLC27A2/PRKAR2B/APOC2/ETFA/PDK1/CYP2S1/EPHX1/ACSL1/AKR1C3/ACSM3/PON3/CYP2C9/TYRP1/ALOX5AP 108

BP GO:0002283 neutrophil activation involved in immune response 126/2416 488/18862 2.93046957135896e-15 3.35876897024988e-13 2.3402231698403e-13 LCN2/CXCL1/S100P/LPCAT1/S100A8/VNN1/CD55/CHI3L1/S100A11/SERPINA1/STBD1/PRDX4/MMP9/PECAM1/RAB31/SERPINA3/FGR/CNN2/OLFM4/CFP/FCGR3B/C3/CTSH/LILRB2/PADI2/ANPEP/PLD1/TCN1/S100A9/PRDX6/CTSC/PGM1/DEGS1/ITGB2/FPR1/CD44/ITGAX/ACAA1/IQGAP2/PTAFR/ATP8A1/SIRPA/PTPRC/PLAU/LILRB3/SELL/ALAD/PLAUR/COTL1/TNFRSF1B/MNDA/CD93/STOM/PLEKHO2/SLC2A3/MME/GMFG/CEACAM6/CR1/VCP/FCN1/CXCR2/TUBB/CTSB/ITGAL/DOK3/S100A12/ARHGAP9/FCER1G/NCKAP1L/SLPI/ANXA3/GLIPR1/TLR2/CLEC5A/STK10/PGRMC1/LTF/GPR84/CTSA/MIF/CD36/SIGLEC5/TYROBP/TNFAIP6/LILRA2/BST2/C3AR1/DERA/CD300A/PNP/LRG1/LILRA3/TTR/ITGAV/CFD/CXCR1/CD14/C5AR1/TBC1D10C/PTPN6/OSCAR/TIMP2/RNASE2/HVCN1/SLC27A2/SIRPB1/S100A7/CAT/DSP/HSPA6/CLEC4D/SERPINB3/FCGR2A/PRSS3/LYZ/CD33/MGST1/GGH/PPBP/FRK/RAB24/TCIRG1/HSP90AB1/FPR2/CD177 126

BP GO:0002446 neutrophil mediated immunity 128/2416 499/18862 3.01014988689164e-15 3.38499874073098e-13 2.3584987693719e-13 LCN2/CXCL1/S100P/LPCAT1/S100A8/VNN1/CD55/CHI3L1/S100A11/SERPINA1/STBD1/PRDX4/MMP9/PECAM1/RAB31/SERPINA3/FGR/CNN2/OLFM4/CFP/FCGR3B/C3/CTSH/LILRB2/PADI2/ANPEP/PLD1/TCN1/S100A9/CXCL6/PRDX6/CTSC/PGM1/DEGS1/ITGB2/FPR1/CD44/ITGAX/ACAA1/IQGAP2/PTAFR/ATP8A1/SIRPA/PTPRC/PLAU/LILRB3/SELL/ALAD/PLAUR/COTL1/TNFRSF1B/MNDA/CD93/STOM/PLEKHO2/SLC2A3/MME/GMFG/CEACAM6/CR1/VCP/FCN1/CXCR2/TUBB/CTSB/ITGAL/DOK3/S100A12/ARHGAP9/FCER1G/NCKAP1L/SLPI/ANXA3/GLIPR1/TLR2/CLEC5A/STK10/PGRMC1/LTF/GPR84/CTSA/MIF/CD36/SIGLEC5/TYROBP/TNFAIP6/BST2/C3AR1/DERA/CD300A/PNP/LRG1/LILRA3/TTR/ITGAV/CFD/CXCR1/CD14/C5AR1/TBC1D10C/PTPN6/OSCAR/TIMP2/RNASE2/HVCN1/SLC27A2/SIRPB1/IL6/S100A7/CAT/F2RL1/DSP/HSPA6/CLEC4D/SERPINB3/FCGR2A/PRSS3/LYZ/CD33/MGST1/GGH/PPBP/FRK/RAB24/TCIRG1/HSP90AB1/FPR2/CD177 128

BP GO:0043312 neutrophil degranulation 125/2416 485/18862 4.38086139136953e-15 4.83517294306711e-13 3.36890802903563e-13 LCN2/CXCL1/S100P/LPCAT1/S100A8/VNN1/CD55/CHI3L1/S100A11/SERPINA1/STBD1/PRDX4/MMP9/PECAM1/RAB31/SERPINA3/FGR/CNN2/OLFM4/CFP/FCGR3B/C3/CTSH/LILRB2/PADI2/ANPEP/PLD1/TCN1/S100A9/PRDX6/CTSC/PGM1/DEGS1/ITGB2/FPR1/CD44/ITGAX/ACAA1/IQGAP2/PTAFR/ATP8A1/SIRPA/PTPRC/PLAU/LILRB3/SELL/ALAD/PLAUR/COTL1/TNFRSF1B/MNDA/CD93/STOM/PLEKHO2/SLC2A3/MME/GMFG/CEACAM6/CR1/VCP/FCN1/CXCR2/TUBB/CTSB/ITGAL/DOK3/S100A12/ARHGAP9/FCER1G/NCKAP1L/SLPI/ANXA3/GLIPR1/TLR2/CLEC5A/STK10/PGRMC1/LTF/GPR84/CTSA/MIF/CD36/SIGLEC5/TYROBP/TNFAIP6/BST2/C3AR1/DERA/CD300A/PNP/LRG1/LILRA3/TTR/ITGAV/CFD/CXCR1/CD14/C5AR1/TBC1D10C/PTPN6/OSCAR/TIMP2/RNASE2/HVCN1/SLC27A2/SIRPB1/S100A7/CAT/DSP/HSPA6/CLEC4D/SERPINB3/FCGR2A/PRSS3/LYZ/CD33/MGST1/GGH/PPBP/FRK/RAB24/TCIRG1/HSP90AB1/FPR2/CD177 125

BP GO:0046395 carboxylic acid catabolic process 77/2416 243/18862 9.62701518216455e-15 1.04321837246729e-12 7.26862677390223e-13 TAT/ACOX1/AMACR/PHYH/ACADS/CPT1A/ACOX2/ETFDH/ACOT8/LDHD/KYNU/ABAT/CBS/CYP4F2/IDO1/ABCB11/LPIN1/GLUL/PCK2/CPT2/CROT/IRS1/ACAT1/DDAH2/ASRGL1/ACAA1/DAO/PCK1/MIR21/OTC/TWIST1/TDO2/ACAA2/BDH2/ACOT4/CRAT/CYP4F12/MLYCD/HMGCL/ALDH5A1/CRYL1/ALDH6A1/PECR/EHHADH/DECR2/HADH/HNMT/HIBCH/KMO/NOS2/ECH1/SORD/DDO/NAGK/AMT/AUH/ACADM/FAAH/SHMT2/HADHA/PGD/SDSL/GOT1/ABCD3/ABHD3/SLC27A4/FABP1/ASPA/SLC27A2/IL4I1/GPT/ETFA/DCXR/IDO2/PON3/HDC/CRYM 77

BP GO:0002819 regulation of adaptive immune response 61/2416 170/18862 1.0845381334994e-14 1.1542584420815e-12 8.04229875311114e-13 C4BPB/HLA-DRB1/IL1B/C3/ANXA1/ZC3H12A/CD40/NFKBIZ/NOD2/LILRB1/MIR21/IRF1/CD274/PTPRC/TNFSF13B/IL33/MR1/IL7R/SASH3/HLA-DRA/TNFRSF1B/IL18R1/FZD5/IL12RB1/CR1/CD80/RIPK2/BTK/ADA/C4BPA/SAMSN1/CLCF1/MALT1/FCGR2B/MAD2L2/DUSP10/CD1C/CCL19/IL27RA/IL1R1/LILRB4/WAS/IL23A/CD160/TNFSF13/PKN1/LTA/BCL6/PRKCQ/SMAD7/TNF/TRPM4/PTPN6/CD1D/SKAP1/IL6/CD1A/TNFAIP3/AZGP1/CD48/CD1B 61

BP GO:1902105 regulation of leukocyte differentiation 84/2416 279/18862 1.58456959065729e-14 1.65684820356446e-12 1.15440942477249e-12 VNN1/LYN/HLA-DRB1/ANXA1/HCLS1/LILRB2/ZC3H12A/PIAS3/NFKBIZ/XBP1/LILRB1/PCK1/MIR21/IRF1/SOCS1/UBASH3B/PTPRC/HOXA7/CTLA4/LILRB3/FBN1/IL7R/CD74/PF4/SASH3/HLA-DRA/CD86/SLAMF8/CD2/IL2RA/CEBPB/PRDM1/IL12RB1/EGR3/CR1/CD80/RIPK2/LEF1/BTK/ADA/RHOH/GPR137B/HMGB3/CD27/CD83/MALT1/IHH/SPINK5/FCGR2B/EVI2B/NCKAP1L/NME1/DUSP10/CCL19/FCRL3/TNFSF9/LTF/RUNX3/LILRB4/RASSF2/IL23A/TYROBP/CA2/IRF4/CRTAM/BCL6/CCR1/TNFSF11/MMP14/PNP/MAFB/SMAD7/NRARP/TNF/FBXW7/FOS/PTPN6/LAG3/SH3RF1/LIF/INHBA/IFNG/TLR4/DTX1 84

BP GO:0050729 positive regulation of inflammatory response 52/2416 133/18862 1.80043411388219e-14 1.85010126185135e-12 1.28905854433126e-12 S100A8/PLA2G2A/C2CD4A/TGM2/IDO1/ZBP1/IL1B/C3/OSMR/NFKBIZ/S100A9/CX3CL1/CTSC/MIR21/IL33/C2CD4B/PDCD4/CEBPB/GPSM3/JAK2/AGT/CEBPA/BTK/HYAL2/S100A12/ETS1/ABCC1/PLA2G7/NMI/TLR2/CCR7/LRRK2/IL23A/GPR4/PTGS2/LPL/LTA/TNFSF11/NAPEPLD/TNF/NFKBIA/ITGA2/WNT5A/IFI35/TLR10/IL6/SERPINE1/IFNG/FABP4/TLR4/STAP1/OSM 52

BP GO:0072507 divalent inorganic cation homeostasis 125/2416 499/18862 4.20404409820986e-14 4.24679708903912e-12 2.95895699686671e-12 S100A8/CD55/CXCL9/THY1/TGM2/EDN2/LYN/CNNM2/SRI/GNA15/CCL11/SNX10/ANK3/PLCE1/CD40/ADM/MT3/S100A9/SLC39A5/CX3CL1/SLC41A1/TMEM38B/HSP90B1/FPR1/SLC30A10/FYN/GJA1/SLC25A23/UBASH3B/F2RL2/PTPRC/PTGDR/MT1G/CAMK2N1/PROK2/APLNR/CXCL10/CXCL11/RAMP3/REG1A/CDH5/CXCL13/MT1F/CD38/CNNM4/EDN1/MT1M/P2RY1/CCR6/SLC24A3/CORO1A/JAK2/GRINA/EDN3/AFG3L2/CALR/TRIM24/TRPV1/CLIC2/P2RY8/STC1/CAV1/EDNRA/CXCR2/ITPR1/GPR65/FAM20A/SLC39A4/MT1E/P2RX5/CXCR4/LCK/HERPUD1/CCL21/CCL19/CCR7/CXCR6/S1PR1/GOT1/TMEM38A/WFS1/CIB2/CD36/GPR4/CD52/CCL13/MT1X/PLCG2/CYP27B1/CD19/MS4A1/S1PR3/FGF2/CCR1/TNFSF11/C3AR1/SWAP70/MCOLN2/MT2A/CYSLTR1/ITGAV/P2RX4/CXCR1/FAM155A/TRPM4/C5AR1/PTPN6/PTGFR/WNT5A/PKD2/F2RL1/SLC1A1/BNIP3/SLC30A1/GPR18/CCR5/CAV2/ADCYAP1/DHRS7C/GPR35/CCR3/TCIRG1/FPR2/CXCL12/NMU 125

BP GO:0051251 positive regulation of lymphocyte activation 98/2416 356/18862 5.6163857246763e-14 5.57894315317846e-12 3.88713011997333e-12 VNN1/CD55/VCAM1/THY1/LYN/IGKC/HLA-DRB1/IL1B/ANXA1/LILRB2/CD40/GPR183/NFKBIZ/NOD2/IGHM/XBP1/CCL2/LILRB1/PCK1/FYN/MIR21/SOCS1/CD274/SIRPA/PTPRC/TNFSF13B/CTLA4/IL7R/VAV3/CD74/SASH3/TRBC1/HLA-DRA/CD86/VAV1/ICOS/CD38/IL2RA/CORO1A/IL12RB1/HLA-DMB/EGR3/CR1/CD80/RIPK2/LEF1/BTK/MAP3K8/ADA/CAV1/RHOH/DOCK8/CD27/IGHG1/HHLA2/CD5/CD83/CLCF1/MALT1/LCK/IHH/CCL21/MAD2L2/NCKAP1L/DUSP10/CCL19/CCR7/FCRL3/AIF1/IL27RA/TNFSF9/LGALS1/RUNX3/LILRB4/MIF/IGHV1-69/IL23A/CD160/IL1A/TYROBP/TNFSF13/HLA-DPA1/BCL6/TNFSF11/MMP14/PNP/PRKCQ/HLA-DPB1/EBI3/PTPN6/CD1D/CD3E/SIRPB1/IL6/IGHD/RASAL3/IFNG/TLR4 98

BP GO:0007162 negative regulation of cell adhesion 86/2416 295/18862 5.97938409220199e-14 5.84215232615145e-12 4.07052118097271e-12 B4GALNT2/GCNT2/SEMA5A/MMP12/IDO1/HLA-DRB1/ANXA1/TWSG1/EPB41L5/LILRB2/ZC3H12A/GBP1/TGFBI/CX3CL1/LAX1/EFNA5/ARHGDIB/LILRB1/MIR21/LAPTM5/IRF1/TACSTD2/SOCS1/ANGPT2/CD274/UBASH3B/PLXNA2/PTPRC/HOXA7/MUC1/CTLA4/TNC/CD74/CD86/FXYD5/ERBB3/TIGIT/PAG1/IL2RA/CEBPB/IL1RN/JAK2/BTN2A2/ASS1/CR1/CD80/PODXL/SEMA6A/PLXND1/SEMA4D/SEMA3E/TNFAIP8L2/PLA2G2D/IHH/CCL21/MAP4K4/COL1A1/FCGR2B/MAD2L2/LRRC32/LGALS1/RUNX3/LILRB4/DUSP22/CRTAM/BCL6/MMP14/RCC2/CD300A/SWAP70/SMAD7/NRARP/MYADM/PTPN6/LAG3/SIPA1/SERPINE1/RND1/KLF4/APOD/SH2B3/PRKAR1A/DTX1/CLDN7/CXCL12/SNAI2 86

BP GO:0031349 positive regulation of defense response 98/2416 361/18862 1.43255275606929e-13 1.37709910099564e-11 9.59494163445387e-12 S100A8/IFI16/MMP12/PLA2G2A/C2CD4A/PSMB9/PARP9/TGM2/LYN/IDO1/ZBP1/IL1B/C3/OSMR/NFKBIZ/S100A9/ICAM2/CX3CL1/CTSC/NOD2/FYN/GJA1/MIR21/AIM2/GBP5/IL33/MUC1/CADM1/SLAMF6/MNDA/C2CD4B/VAV1/PDCD4/CEBPB/PYHIN1/GPSM3/CLEC4E/JAK2/AGT/CEBPA/SH2D1A/RIPK2/RASGRP1/BTK/FCN1/HYAL2/S100A12/FCER1G/ETS1/ABCC1/PLA2G7/MALT1/NMI/PSMB8/CLEC4A/TLR2/CCR7/LRRK2/IL23A/MAVS/CD160/GPR4/TYROBP/HCK/PTGS2/PLCG2/LPL/LTA/LILRA2/CRTAM/TNFSF11/NAPEPLD/PRKACB/NLRC5/TLR8/TNF/NFKBIA/ITGA2/WNT5A/CD1D/IFI35/TLR10/LAG3/MUC20/IL6/SERPINE1/F2RL1/IL18RAP/IFNG/CLEC4D/FABP4/TLR4/PSMA8/STAP1/OSM/FPR2/KLK7/MUCL1 98

BP GO:0006959 humoral immune response 101/2416 380/18862 2.54455593848519e-13 2.40723069736059e-11 1.67723862611931e-11 LCN2/PI3/CXCL1/CXCL3/S100A8/CD55/C2/PLA2G2A/CXCL9/CXCL2/C4BPB/CFB/DEFB1/IGKC/SERPING1/HLA-DRB1/CFP/IL1B/TRAF3IP2/C3/DEFB4A/DMBT1/C1R/GPR183/S100A9/IGLV2-23/CXCL6/IGLV3-19/NOD2/IGHM/SPNS2/CCL2/PTPRC/IGLV1-44/PF4/TRBC1/CXCL10/CXCL11/REG1A/CFHR2/CXCL13/KLK3/LEAP2/CCR6/CFI/REG3A/C1S/CR1/RARRES2/SH2D1A/DEFA6/IGLV6-57/FCN1/CLU/C4BPA/S100A12/IGHG1/CD83/SPINK5/FCGR2B/DEFA5/SLPI/IGKV3-20/IGKV4-1/POU2AF1/CCR7/GATA6/LTF/RNASE6/MFAP4/REG1B/IGHV1-69/TREM1/FCN3/CCL13/CD19/GNLY/MS4A1/LTA/C3AR1/CXCL5/CFD/TNF/EBI3/C5AR1/PTPN6/SEMG1/IL6/S100A7/IGHD/IGKV1-5/IFNG/CR2/PRSS3/KRT6A/HLA-DQB1/LYZ/PAX5/PPBP/KLK7/CHGA 101

BP GO:0002687 positive regulation of leukocyte migration 50/2416 133/18862 3.41982299058808e-13 3.18471015998515e-11 2.21894764767598e-11 THY1/EDN2/SELP/CX3CL1/ICAM1/VEGFC/PTAFR/RAC2/CD74/CXCL10/CXCL13/CCL20/EDN1/CCR6/GPSM3/EDN3/CCL4/CALR/RARRES2/DOCK8/PLA2G7/DAPK2/MADCAM1/CCL21/NCKAP1L/CXCL17/CCL19/CCR7/AIF1/IL1R1/PLVAP/CSF1R/IL23A/CCR1/MMP14/C3AR1/SWAP70/P2RX4/ITGA4/TNF/C5AR1/ITGA2/WNT5A/IL6/JAM2/SERPINE1/S100A7/F2RL1/FPR2/CXCL12 50

BP GO:0002695 negative regulation of leukocyte activation 61/2416 182/18862 3.63772151074087e-13 3.33551080061778e-11 2.32401803398749e-11 LYN/IDO1/FGR/HLA-DRB1/ANXA1/TWSG1/LILRB2/ZC3H12A/CX3CL1/CST7/LAX1/LILRB1/MIR21/LAPTM5/IRF1/SOCS1/CD274/PTPRC/LST1/CTLA4/SYT11/CD74/MNDA/CD86/TIGIT/PAG1/IL2RA/LRFN5/CEBPB/IL13RA2/BTN2A2/CR1/CD80/BTK/HMGB3/SAMSN1/TNFAIP8L2/PLA2G2D/IHH/FCGR2B/BANK1/LRRC32/RUNX3/LILRB4/TYROBP/PKN1/CRTAM/BCL6/CD300LF/CD300A/SMAD7/ENPP3/NRARP/TBC1D10C/PTPN6/LAG3/INHBA/TNFAIP3/FOXF1/PRKAR1A/DTX1 61

BP GO:0002822 regulation of adaptive immune response based on somatic recombination of immune receptors built from immunoglobulin superfamily domains 55/2416 155/18862 3.72027399860533e-13 3.35952015631633e-11 2.34074655893111e-11 C4BPB/HLA-DRB1/IL1B/C3/ANXA1/ZC3H12A/CD40/NFKBIZ/NOD2/LILRB1/MIR21/CD274/PTPRC/TNFSF13B/IL33/MR1/IL7R/SASH3/HLA-DRA/TNFRSF1B/IL18R1/FZD5/IL12RB1/CR1/CD80/RIPK2/BTK/ADA/C4BPA/CLCF1/MALT1/FCGR2B/MAD2L2/CD1C/CCL19/IL27RA/IL1R1/LILRB4/WAS/IL23A/TNFSF13/PKN1/LTA/BCL6/PRKCQ/SMAD7/TNF/TRPM4/PTPN6/CD1D/IL6/CD1A/TNFAIP3/AZGP1/CD1B 55

BP GO:0045765 regulation of angiogenesis 92/2416 335/18862 3.87446332655665e-13 3.44653752631009e-11 2.40137593452726e-11 SEMA5A/CHI3L1/ECSCR/ITGA5/HIF1A/GLUL/CCL11/IL1B/TNMD/GREM1/C3/RAMP2/SULF1/CTSH/ZC3H12A/CD40/ADM/STAT1/PPARG/ADAMTS9/HOXA5/ITGB2/ITGAX/XBP1/ADAMTS1/VEGFC/EFNA1/MIR21/TWIST1/ANGPT2/SPARC/SEMA4A/GAB1/PROK2/F3/CD34/PF4/APLNR/RHOJ/CXCL10/PLK2/TEK/CDH5/CXCL13/PPP1R16B/KLK3/THBS2/TIE1/APOH/SERPINF1/SEMA6A/PLXND1/KDR/SEMA3E/ETS1/COL4A2/CXCR4/PTPRM/SPINK5/FOXO4/HGF/ANXA3/EPHA2/GATA6/ENPP2/DCN/CD160/IL1A/GPR4/FUT1/HHEX/PIK3CD/FGF2/C3AR1/LRG1/ENG/SPHK1/TNF/C5AR1/ECM1/WNT5A/ADAM12/IL6/SERPINE1/MIR214/TNFAIP3/AQP1/KLF4/HYAL1/CCR3/TSPAN12/SFRP2 92

BP GO:1990868 response to chemokine 41/2416 97/18862 4.91889451523784e-13 4.24878424794457e-11 2.96034155036053e-11 CXCL1/CXCL3/CXCL9/CXCL2/HIF1A/CCL11/ZC3H12A/PADI2/CXCL6/CX3CL1/CCL2/ROBO1/CCL18/PF4/CXCL10/CXCL11/REG1A/CXCL13/CCL20/EDN1/CCR6/CCL22/CCL4/CXCR2/DOCK8/CXCR4/CCL21/CCL19/CCR7/CXCR6/CCL13/CCR1/CXCL5/CXCR1/CCR5/SH2B3/GPR35/PPBP/CCR3/TFF2/CXCL12 41

BP GO:1990869 cellular response to chemokine 41/2416 97/18862 4.91889451523784e-13 4.24878424794457e-11 2.96034155036053e-11 CXCL1/CXCL3/CXCL9/CXCL2/HIF1A/CCL11/ZC3H12A/PADI2/CXCL6/CX3CL1/CCL2/ROBO1/CCL18/PF4/CXCL10/CXCL11/REG1A/CXCL13/CCL20/EDN1/CCR6/CCL22/CCL4/CXCR2/DOCK8/CXCR4/CCL21/CCL19/CCR7/CXCR6/CCL13/CCR1/CXCL5/CXCR1/CCR5/SH2B3/GPR35/PPBP/CCR3/TFF2/CXCL12 41

BP GO:0002449 lymphocyte mediated immunity 96/2416 360/18862 8.07441580038645e-13 6.87478831004332e-11 4.79001057631948e-11 CD55/BTN3A3/C2/C4BPB/IGKC/SERPING1/HLA-DRB1/IL1B/C3/CTSH/CD40/SERPINB9/C1R/IGLV2-23/IGLV3-19/CTSC/ICAM1/NOD2/IGHM/LILRB1/GZMB/PTPRC/IGLV1-44/CADM1/MR1/IL7R/SLAMF6/CD74/SASH3/TRBC1/HLA-DRA/TNFRSF1B/IL18R1/VAV1/RFTN1/IL13RA2/CCR6/FZD5/CFI/CORO1A/IL12RB1/C1S/CR1/SH2D1A/RASGRP1/BTK/IGLV6-57/TUBB/CLU/C4BPA/CD27/FCER1G/IGHG1/BTN3A2/CLCF1/MALT1/FCGR2B/MAD2L2/IGKV3-20/IGKV4-1/CD1C/SLAMF7/IL27RA/IL1R1/LILRB4/IGHV1-69/WAS/IL23A/CD160/TNFSF13/CD19/LTA/CRTAM/BCL6/SWAP70/BATF/SMAD7/TLR8/TNF/TRPM4/PTPN6/PRF1/CD8A/CD1D/LAG3/IL6/CD1A/IGHD/IL18RAP/AZGP1/IGKV1-5/CR2/CD1B/HLA-DQB1/GAPT/TCIRG1 96

BP GO:0016042 lipid catabolic process 92/2416 340/18862 9.82623620646227e-13 8.24850250570636e-11 5.74714630607764e-11 ACOX1/LIPC/AMACR/GBA3/PLIN1/PHYH/PLA2G2A/NAAA/PLCD3/ACADS/ABHD5/CPT1A/ACOX2/ETFDH/ACOT8/CYP4F2/PLCD1/ABCB11/LPIN1/PCK2/PLA2G12B/PLA1A/CPT2/IL1B/PLCE1/CROT/IRS1/PNLIPRP2/PLD1/ACAT1/MT3/PRDX6/ACAA1/PCK1/TWIST1/ACAA2/GPCPD1/BDH2/FABP3/CRAT/CYP4F12/MLYCD/PPT1/PECR/EHHADH/DECR2/NEU4/CYP27A1/HADH/CRTC3/RARRES2/CES2/STS/ECH1/SRD5A3/PLA2G12A/PLA2G7/PLA2G2D/AUH/HSD17B11/HSD11B1/ACADM/FAAH/LIPG/HADHA/CYP3A4/CES3/FABP2/ENPP2/ABCD3/ABHD3/AKR1B10/GDPD3/PLCG2/LPL/MGLL/CYP27B1/SLC27A4/NAPEPLD/FABP1/SPP1/SRD5A1/SPHK1/APOC1/TNF/HINT2/SLC27A2/APOC2/ETFA/AKR1C3/FABP4/CPS1 92

BP GO:0050866 negative regulation of cell activation 64/2416 200/18862 1.04776002987085e-12 8.67312469170867e-11 6.04300192666738e-11 LYN/IDO1/FGR/HLA-DRB1/ANXA1/TWSG1/LILRB2/ZC3H12A/CX3CL1/CST7/LAX1/LILRB1/MIR21/LAPTM5/IRF1/SOCS1/CD274/UBASH3B/PTPRC/LST1/CTLA4/SYT11/CD74/MNDA/CD86/THBD/TIGIT/PAG1/IL2RA/LRFN5/CEBPB/IL13RA2/BTN2A2/CR1/CD80/BTK/HMGB3/SAMSN1/TNFAIP8L2/PLA2G2D/IHH/FCGR2B/BANK1/LRRC32/RUNX3/LILRB4/TYROBP/PKN1/CRTAM/BCL6/CD300LF/CD300A/SMAD7/ENPP3/NRARP/TBC1D10C/PTPN6/LAG3/INHBA/TNFAIP3/SH2B3/FOXF1/PRKAR1A/DTX1 64

BP GO:0046632 alpha-beta T cell differentiation 43/2416 107/18862 1.07919234092066e-12 8.81094020806458e-11 6.13902492419901e-11 HLA-DRB1/ANXA1/EOMES/ZC3H12A/GPR183/NFKBIZ/MIR21/IRF1/SOCS1/SEMA4A/SLAMF6/SASH3/HLA-DRA/CD86/IL18R1/PRDM1/IL12RB1/TNFSF8/CD80/RIPK2/LEF1/STAT3/ADA/ITK/CD83/MALT1/PLA2G2D/IHH/NCKAP1L/CCL19/RUNX3/LILRB4/IL23A/IRF4/BCL6/BATF/PNP/TMEM98/SMAD7/LY9/SH3RF1/IL6/IFNG 43

BP GO:1901342 regulation of vasculature development 92/2416 341/18862 1.17975038770101e-12 9.50177339283516e-11 6.62036312870624e-11 SEMA5A/CHI3L1/ECSCR/ITGA5/HIF1A/GLUL/CCL11/IL1B/TNMD/GREM1/C3/RAMP2/SULF1/CTSH/ZC3H12A/CD40/ADM/STAT1/PPARG/ADAMTS9/HOXA5/ITGB2/ITGAX/XBP1/ADAMTS1/VEGFC/EFNA1/MIR21/TWIST1/ANGPT2/SPARC/SEMA4A/GAB1/PROK2/F3/CD34/PF4/APLNR/RHOJ/CXCL10/PLK2/TEK/CDH5/CXCL13/PPP1R16B/KLK3/THBS2/TIE1/APOH/SERPINF1/SEMA6A/PLXND1/KDR/SEMA3E/ETS1/COL4A2/CXCR4/PTPRM/SPINK5/FOXO4/HGF/ANXA3/EPHA2/GATA6/ENPP2/DCN/CD160/IL1A/GPR4/FUT1/HHEX/PIK3CD/FGF2/C3AR1/LRG1/ENG/SPHK1/TNF/C5AR1/ECM1/WNT5A/ADAM12/IL6/SERPINE1/MIR214/TNFAIP3/AQP1/KLF4/HYAL1/CCR3/TSPAN12/SFRP2 92

BP GO:0032609 interferon-gamma production 44/2416 112/18862 1.50342910202516e-12 1.19472499307599e-10 8.32424955437087e-11 HLA-DRB1/IL1B/SLC7A5/ZC3H12A/NOD2/NR1H4/LILRB1/LAPTM5/CD274/BTN3A1/SIRPA/IL33/SLAMF6/SASH3/IL18R1/PDE4B/CD2/FZD5/IL12RB1/CR1/RIPK2/RASGRP1/BTN3A2/CCR7/IL27RA/IL1R1/LILRB4/IL23A/CD160/HLA-DPA1/LTA/CRTAM/TLR8/ISG15/HLA-DPB1/CD14/TNF/EBI3/WNT5A/CD3E/INHBA/F2RL1/IRF8/TLR4 44

BP GO:0045582 positive regulation of T cell differentiation 38/2416 88/18862 1.55921503406783e-12 1.2068729354603e-10 8.40889037511633e-11 VNN1/HLA-DRB1/ANXA1/LILRB2/NFKBIZ/XBP1/PCK1/MIR21/SOCS1/PTPRC/IL7R/CD74/SASH3/HLA-DRA/CD86/IL2RA/IL12RB1/EGR3/CR1/CD80/RIPK2/LEF1/ADA/RHOH/CD27/CD83/MALT1/IHH/NCKAP1L/DUSP10/CCL19/TNFSF9/RUNX3/LILRB4/IL23A/BCL6/PNP/IFNG 38

BP GO:0070098 chemokine-mediated signaling pathway 38/2416 88/18862 1.55921503406783e-12 1.2068729354603e-10 8.40889037511633e-11 CXCL1/CXCL3/CXCL9/CXCL2/HIF1A/CCL11/PADI2/CXCL6/CX3CL1/CCL2/ROBO1/CCL18/PF4/CXCL10/CXCL11/CXCL13/CCL20/EDN1/CCR6/CCL22/CCL4/CXCR2/CXCR4/CCL21/CCL19/CCR7/CXCR6/CCL13/CCR1/CXCL5/CXCR1/CCR5/SH2B3/GPR35/PPBP/CCR3/TFF2/CXCL12 38

BP GO:0002831 regulation of response to biotic stimulus 106/2416 420/18862 2.2676252754211e-12 1.73269828737304e-10 1.20725799076063e-10 IRAK3/CD55/IFI16/MMP12/LRP8/RNF135/PSMB9/PARP9/LYN/FGR/ZBP1/SERPING1/HLA-DRB1/TRAF3IP2/BIRC3/SEC14L1/ZC3H12A/SERPINB9/STAT1/CXCL6/ICAM2/CX3CL1/PPARG/NOD2/LILRB1/FYN/SOCS3/MIR21/AIM2/IRF1/SOCS1/CD274/GBP5/MUC1/CADM1/MR1/SYT11/SLAMF6/MICB/IFNAR2/MNDA/HTRA1/VAV1/SLAMF8/IL2RA/PYHIN1/CLEC4E/JAK2/IL12RB1/CR1/APPL2/SH2D1A/RIPK2/RASGRP1/FCN1/APOBEC3G/CD180/LY96/FCER1G/MALT1/NMI/SPINK5/PSMB8/FCGR2B/DUSP10/CLEC4A/GATA6/LTF/CD36/IL23A/MAVS/CD160/TYROBP/HCK/PLCG2/CARD8/LILRA2/CRTAM/PRKACB/NLRC5/NLRC3/TRAFD1/PARP14/TLR8/PTPN6/WNT5A/TSPAN6/CD1D/IFI35/LAG3/IFNGR1/MUC20/F2RL1/IL18RAP/TNFAIP3/USP18/IFNG/CLEC4D/TLR4/PSMA8/ZDHHC11/LY86/HSP90AB1/FPR2/KLK7/MUCL1 106

BP GO:0045619 regulation of lymphocyte differentiation 58/2416 175/18862 2.33934307843904e-12 1.74376439724106e-10 1.21496830574284e-10 VNN1/HLA-DRB1/ANXA1/LILRB2/ZC3H12A/NFKBIZ/XBP1/PCK1/MIR21/IRF1/SOCS1/PTPRC/CTLA4/IL7R/CD74/SASH3/HLA-DRA/CD86/SLAMF8/CD2/IL2RA/PRDM1/IL12RB1/EGR3/CR1/CD80/RIPK2/LEF1/BTK/ADA/RHOH/HMGB3/CD27/CD83/MALT1/IHH/SPINK5/NCKAP1L/DUSP10/CCL19/FCRL3/TNFSF9/RUNX3/LILRB4/IL23A/IRF4/CRTAM/BCL6/MMP14/PNP/SMAD7/NRARP/PTPN6/LAG3/SH3RF1/INHBA/IFNG/DTX1 58

BP GO:0002285 lymphocyte activation involved in immune response 61/2416 189/18862 2.34062335200142e-12 1.74376439724106e-10 1.21496830574284e-10 HLA-DRB1/ANXA1/EOMES/ZC3H12A/CD40/GPR183/NFKBIZ/ICAM1/XBP1/LILRB1/PCK1/MIR21/PTPRC/SEMA4A/SLAMF6/CD74/HLA-DRA/CD86/IL18R1/DOCK11/CCR6/CORO1A/IL12RB1/HLA-DMB/CR1/CD80/ST3GAL1/RIPK2/LEF1/STAT3/LCP1/ADA/ITGAL/CD180/FCER1G/CLCF1/MALT1/FCGR2B/MAD2L2/CD1C/POU2AF1/CCL19/IL27RA/LGALS1/IL23A/TNFSF13/PLCG2/IRF4/CD19/BCL6/SWAP70/BATF/TMEM98/SMAD7/LY9/IL6/ITM2A/F2RL1/IFNG/TLR4/GAPT 61

BP GO:0046634 regulation of alpha-beta T cell activation 41/2416 101/18862 2.4378944755944e-12 1.7938087746349e-10 1.24983673894996e-10 CD55/HLA-DRB1/ANXA1/TWSG1/ZC3H12A/NFKBIZ/LILRB1/MIR21/IRF1/SOCS1/CD274/PTPRC/SASH3/HLA-DRA/CD86/PRDM1/IL12RB1/CD80/RIPK2/ADA/CD83/MALT1/IHH/NCKAP1L/CCL19/RUNX3/LILRB4/IL23A/CD160/IRF4/CRTAM/BCL6/CD300A/PNP/PRKCQ/SMAD7/EBI3/CD3E/SH3RF1/RASAL3/IFNG 41

BP GO:0009636 response to toxic substance 71/2416 239/18862 3.46877040595856e-12 2.52120385603817e-10 1.75664945462215e-10 SLC6A14/SLC23A1/DUOX2/GPX8/ABCG2/SLC22A5/PRDX4/LYN/TRPM6/PDZD3/MT3/S100A9/PRDX6/SLC30A10/MIR21/SCN9A/MT1G/PDGFRB/SLC7A11/ALAD/CLDN1/DDC/MT1F/MT1M/MPST/BPHL/ASS1/CCL4/PINK1/PTGES/CLIC2/APOM/CHKA/BMP7/EPHX2/GPX7/MT1E/PXDN/IYD/SOD2/NXN/TLR2/CD36/FBLN5/AKR1B10/PTGS2/MT1X/FABP1/MT2A/PDZK1/SRD5A1/IPCEF1/FOS/GSTA1/GUCY2C/SLC22A18/CAT/SLC15A2/SLC30A1/EPHX1/GSTO2/GPX2/SOD3/PON3/AKR7A3/MGST1/H19/AHR/ALOX5AP/CPS1/GSTT1 71

BP GO:0045580 regulation of T cell differentiation 51/2416 146/18862 5.25077572253118e-12 3.77043654292601e-10 2.62705266016303e-10 VNN1/HLA-DRB1/ANXA1/LILRB2/ZC3H12A/NFKBIZ/XBP1/PCK1/MIR21/IRF1/SOCS1/PTPRC/CTLA4/IL7R/CD74/SASH3/HLA-DRA/CD86/CD2/IL2RA/PRDM1/IL12RB1/EGR3/CR1/CD80/RIPK2/LEF1/ADA/RHOH/CD27/CD83/MALT1/IHH/SPINK5/NCKAP1L/DUSP10/CCL19/TNFSF9/RUNX3/LILRB4/IL23A/IRF4/CRTAM/BCL6/PNP/SMAD7/NRARP/LAG3/SH3RF1/IFNG/DTX1 51

BP GO:0060333 interferon-gamma-mediated signaling pathway 38/2416 91/18862 5.45950731900355e-12 3.87365043110252e-10 2.69896696409386e-10 VCAM1/PARP9/HLA-DRB1/TRIM22/GBP1/IFI30/OAS2/STAT1/PPARG/ICAM1/CD44/SOCS3/IRF9/PTAFR/IRF1/SOCS1/HLA-DRA/GBP2/JAK2/FCGR1B/CIITA/NMI/IRF6/HLA-DPA1/HCK/IRF4/FCGR1A/NLRC5/MT2A/PARP14/HLA-DPB1/IFNGR1/IFNG/IRF8/HLA-DQB1/OASL/HSP90AB1/HLA-DQA1 38

BP GO:0035710 CD4-positive, alpha-beta T cell activation 40/2416 100/18862 7.86405895547247e-12 5.51409310289599e-10 3.84194583025868e-10 CD55/HLA-DRB1/ANXA1/TWSG1/ZC3H12A/GPR183/NFKBIZ/MIR21/SOCS1/CD274/SEMA4A/SLAMF6/SASH3/HLA-DRA/CD86/IL18R1/IL12RB1/CD80/RIPK2/LEF1/STAT3/CD83/MALT1/PLA2G2D/NCKAP1L/CCL19/RUNX3/IL23A/CD160/IRF4/BCL6/BATF/PRKCQ/TMEM98/SMAD7/LY9/SH3RF1/IL6/IFNG/TCIRG1 40

BP GO:0072503 cellular divalent inorganic cation homeostasis 115/2416 480/18862 1.01357101582478e-11 7.02428285385543e-10 4.89417093932527e-10 S100A8/CD55/CXCL9/THY1/TGM2/EDN2/LYN/SRI/GNA15/CCL11/PLCE1/CD40/ADM/MT3/S100A9/SLC39A5/CX3CL1/SLC41A1/TMEM38B/HSP90B1/FPR1/SLC30A10/FYN/GJA1/SLC25A23/UBASH3B/F2RL2/PTPRC/PTGDR/MT1G/PROK2/APLNR/CXCL10/CXCL11/RAMP3/CDH5/CXCL13/MT1F/CD38/EDN1/MT1M/P2RY1/CCR6/SLC24A3/CORO1A/JAK2/GRINA/EDN3/AFG3L2/CALR/TRPV1/CLIC2/P2RY8/STC1/CAV1/EDNRA/CXCR2/ITPR1/GPR65/SLC39A4/MT1E/P2RX5/CXCR4/LCK/HERPUD1/CCL21/CCL19/CCR7/CXCR6/S1PR1/GOT1/TMEM38A/WFS1/CIB2/CD36/GPR4/CD52/CCL13/MT1X/PLCG2/CD19/MS4A1/S1PR3/FGF2/CCR1/C3AR1/SWAP70/MCOLN2/MT2A/CYSLTR1/ITGAV/P2RX4/CXCR1/FAM155A/TRPM4/C5AR1/PTPN6/PTGFR/WNT5A/PKD2/F2RL1/SLC1A1/BNIP3/SLC30A1/GPR18/CCR5/CAV2/ADCYAP1/DHRS7C/GPR35/CCR3/TCIRG1/FPR2/CXCL12/NMU 115

BP GO:0042098 T cell proliferation 61/2416 195/18862 1.04646115487388e-11 7.16886032534292e-10 4.99490533088623e-10 CD55/VCAM1/MSN/IDO1/HLA-DRB1/IL1B/ANXA1/TWSG1/LILRB2/LILRB1/FYN/MIR21/IRF1/CD274/BTN3A1/PTPRC/TNFSF13B/RAC2/CTLA4/SASH3/TNFRSF1B/CD86/IL2RA/CEBPB/CORO1A/IL12RB1/HLA-DMB/BTN2A2/CR1/TNFSF8/CD80/RIPK2/RASGRP1/DOCK8/HHLA2/MALT1/PLA2G2D/IHH/NCKAP1L/CCL19/LRRC32/AIF1/IL27RA/TNFSF9/LILRB4/IL23A/IL1A/HLA-DPA1/ELF4/CRTAM/PNP/PRKCQ/HLA-DPB1/EBI3/PTPN6/CD1D/CD3E/SH3RF1/IL6/RASAL3/PRKAR1A 61

BP GO:0001501 skeletal system development 116/2416 486/18862 1.06528935602212e-11 7.2149142748771e-10 5.02699343242497e-10 TIMP1/ANKH/CHI3L1/BMP3/FGFR2/PITX2/PRRX1/HOXA2/MMP9/HAPLN3/LUM/HOXA9/HIF1A/FGR/SNX10/GREM1/CREB3L2/CHAD/HOXA3/SULF1/COL1A2/FGFR3/TGFBI/ACVR2A/COL5A2/TMEM38B/HOXA5/BGN/CD44/SPNS2/HOXA4/LILRB1/PLS3/GJA1/CHST11/MIR21/TWIST1/PTPRC/HOXA7/PPIB/FBN1/CDH11/FLVCR1/TEK/SCIN/COL3A1/PBX1/EDN1/HES5/MGP/MTHFD1L/CHRDL2/TRPS1/STC1/SH3PXD2B/SEMA4D/HYAL2/BMP7/HOXA6/SATB2/TULP3/HOXA10/HOXB6/SULF2/IHH/GNA11/COL1A1/TIFAB/PAPSS2/CHSY1/EPHA2/LTF/RUNX3/RASSF2/EFEMP1/CSGALNACT1/VCAN/BMP5/TYROBP/TEAD4/PAPSS1/FGF2/PKDCC/TNFSF11/MMP14/SERPINH1/SRD5A1/SMAD7/ENG/GLG1/FBXW7/ECM1/HOXB5/PTPN6/HOXB7/WNT5A/DCHS1/HOXD8/ADAMTS12/HOXB9/MEIS1/GRHL2/SH2B3/PAX5/ZNF385A/HAPLN1/HYAL1/FRZB/TNFRSF11B/CDX1/TMEM119/SFRP2/SNAI2/PTHLH/OSR1/MMP13 116

BP GO:0051250 negative regulation of lymphocyte activation 52/2416 153/18862 1.07817325843434e-11 7.22012653962768e-10 5.03062507927079e-10 LYN/IDO1/FGR/HLA-DRB1/ANXA1/TWSG1/LILRB2/ZC3H12A/LAX1/LILRB1/MIR21/LAPTM5/IRF1/SOCS1/CD274/LST1/CTLA4/CD74/MNDA/CD86/TIGIT/PAG1/IL2RA/CEBPB/BTN2A2/CR1/CD80/BTK/HMGB3/SAMSN1/TNFAIP8L2/PLA2G2D/IHH/FCGR2B/BANK1/LRRC32/RUNX3/LILRB4/TYROBP/PKN1/CRTAM/BCL6/CD300A/SMAD7/NRARP/TBC1D10C/PTPN6/LAG3/INHBA/TNFAIP3/PRKAR1A/DTX1 52

BP GO:0045621 positive regulation of lymphocyte differentiation 40/2416 101/18862 1.14221995980156e-11 7.56403440046369e-10 5.27024297241774e-10 VNN1/HLA-DRB1/ANXA1/LILRB2/NFKBIZ/XBP1/PCK1/MIR21/SOCS1/PTPRC/IL7R/CD74/SASH3/HLA-DRA/CD86/IL2RA/IL12RB1/EGR3/CR1/CD80/RIPK2/LEF1/BTK/ADA/RHOH/CD27/CD83/MALT1/IHH/NCKAP1L/DUSP10/CCL19/TNFSF9/RUNX3/LILRB4/IL23A/BCL6/MMP14/PNP/IFNG 40

BP GO:1903706 regulation of hemopoiesis 103/2416 415/18862 1.36408956318816e-11 8.93403713912242e-10 6.2247927435249e-10 VNN1/LYN/HOXA9/HIF1A/HLA-DRB1/ANXA1/HCLS1/LILRB2/ZC3H12A/ACVR2A/PIAS3/STAT1/NFKBIZ/HOXA5/XBP1/LILRB1/PCK1/MIR21/IRF1/SOCS1/UBASH3B/PTPRC/HOXA7/CTLA4/LILRB3/FBN1/IL7R/CD74/PF4/SASH3/HLA-DRA/CD86/SCIN/SLAMF8/CD2/IL2RA/CEBPB/PRDM1/IL12RB1/CSF3R/EGR3/CR1/CD80/RIPK2/LEF1/STAT3/BTK/ADA/RHOH/GPR137B/HMGB3/CD27/ETS1/CD83/MALT1/IHH/SPINK5/FCGR2B/EVI2B/NCKAP1L/NME1/DUSP10/CCL19/GPR171/FCRL3/TNFSF9/LTF/RUNX3/SPI1/LILRB4/RASSF2/NR4A3/IL23A/TYROBP/CA2/IRF4/CRTAM/BCL6/CCR1/TNFSF11/MMP14/PNP/MAFB/PRKCQ/SMAD7/ISG15/NRARP/TNF/FBXW7/FOS/PTPN6/NFKBIA/LAG3/SH3RF1/LIF/INHBA/ZFP36/MYL9/MEIS1/IFNG/TLR4/DTX1/CSF3 103

BP GO:0002688 regulation of leukocyte chemotaxis 44/2416 119/18862 1.69399258235482e-11 1.0974125859603e-09 7.6462250999883e-10 EDN2/LYN/GREM1/PADI2/NOD2/CCL2/VEGFC/RAC2/CD74/CXCL10/SLAMF8/CXCL13/EDN1/CCR6/GPSM3/EDN3/CCL4/CALR/RARRES2/MMP28/PLA2G7/DAPK2/CCL21/NCKAP1L/CXCL17/CCL19/CCR7/AIF1/MIF/CSF1R/IL23A/CCR1/C3AR1/SWAP70/C5AR1/WNT5A/IL6/SERPINE1/S100A7/F2RL1/STAP1/MST1/FPR2/CXCL12 44

BP GO:0032649 regulation of interferon-gamma production 41/2416 107/18862 2.20901228495396e-11 1.415668087992e-09 9.86367115352955e-10 HLA-DRB1/IL1B/SLC7A5/ZC3H12A/NOD2/NR1H4/LILRB1/LAPTM5/CD274/SIRPA/IL33/SLAMF6/SASH3/IL18R1/PDE4B/CD2/FZD5/IL12RB1/CR1/RIPK2/RASGRP1/CCR7/IL27RA/IL1R1/LILRB4/IL23A/CD160/HLA-DPA1/LTA/CRTAM/TLR8/ISG15/HLA-DPB1/CD14/TNF/EBI3/WNT5A/CD3E/INHBA/IRF8/TLR4 41

BP GO:0002705 positive regulation of leukocyte mediated immunity 45/2416 125/18862 2.87478644954112e-11 1.82273694034735e-09 1.26999244607388e-09 HLA-DRB1/IL1B/C3/CD40/ITGB2/NOD2/PTAFR/PTPRC/CADM1/MR1/SLAMF6/SASH3/HLA-DRA/IL18R1/VAV1/FZD5/IL12RB1/NOS2/SH2D1A/RASGRP1/BTK/CLCF1/MALT1/MAD2L2/CD1C/IL1R1/IL23A/MAVS/CD160/TYROBP/TNFSF13/LTA/CRTAM/DDX21/TNF/CD1D/LAG3/IL6/CD1A/F2RL1/IL18RAP/AZGP1/CD1B/STAP1/CD177 45

BP GO:0018212 peptidyl-tyrosine modification 94/2416 372/18862 3.73535221981927e-11 2.34344202422346e-09 1.63279385121186e-09 FGFR2/LRP8/ITGA5/THY1/PARP9/LYN/PECAM1/FGR/GREM1/HCLS1/CD40/FGFR3/LTK/SH3BP5/EFNA5/ICAM1/ITGB2/NOD2/CD44/TGFA/FYN/SOCS3/EFNA1/SOCS1/PTPRC/INSR/AFAP1L2/PDGFRB/CD74/TEK/ERBB3/HES5/TPST2/DGKQ/TIE1/JAK2/CD80/AGT/RIPK2/STAT3/BTK/CAV1/SEMA4D/HYAL2/KDR/ITK/SAMSN1/AREG/CBLC/CLCF1/DDR2/LCK/DYRK2/TPST1/STAP2/HGF/IL24/BANK1/PTK6/EPHA2/LILRB4/ENPP2/MIF/EFEMP1/CSF1R/CD36/IL23A/HCK/DUSP22/TESK2/PKDCC/FCGR1A/CD300A/PARP14/TNF/FBXW7/PTPN6/GHR/CD3E/NRG1/LIF/IL6/DDR1/IFNG/SH2B3/LRP4/STAP1/OSM/SFRP2/IL11/MAP2K6/ERRFI1/CSF3/RELN 94

BP GO:0071706 tumor necrosis factor superfamily cytokine production 54/2416 167/18862 3.87909924867659e-11 2.40827411688671e-09 1.67796562895056e-09 IRAK3/SPHK2/ZC3H12A/CX3CL1/NOD2/NR1H4/LILRB1/PTAFR/TWIST1/CD274/SIRPA/PTPRC/IL33/SYT11/CD34/PF4/SASH3/CD86/CD2/MAPKAPK2/FZD5/UBE2J1/JAK2/RIPK2/RASGRP1/STAT3/SLAMF1/CLU/LY96/CLEC4A/TLR2/CCL19/IL27RA/LTF/MIF/TLR1/CD36/IL23A/MAVS/IL1A/TYROBP/LPL/LILRA2/NLRC3/CD14/PTPN6/WNT5A/IFNGR1/ZFP36/IL6/TNFAIP3/IFNG/TLR4/CD33 54

BP GO:0042129 regulation of T cell proliferation 54/2416 168/18862 5.0126860140814e-11 3.0799596540129e-09 2.14596270488889e-09 CD55/VCAM1/IDO1/HLA-DRB1/IL1B/ANXA1/TWSG1/LILRB2/LILRB1/MIR21/IRF1/CD274/PTPRC/TNFSF13B/RAC2/CTLA4/SASH3/TNFRSF1B/CD86/IL2RA/CEBPB/CORO1A/IL12RB1/HLA-DMB/BTN2A2/CR1/TNFSF8/CD80/RIPK2/HHLA2/PLA2G2D/IHH/NCKAP1L/CCL19/LRRC32/AIF1/IL27RA/TNFSF9/LILRB4/IL23A/IL1A/HLA-DPA1/CRTAM/PNP/PRKCQ/HLA-DPB1/EBI3/PTPN6/CD1D/CD3E/SH3RF1/IL6/RASAL3/PRKAR1A 54

BP GO:0043367 CD4-positive, alpha-beta T cell differentiation 34/2416 81/18862 5.96695185161719e-11 3.61802273231762e-09 2.52085829724355e-09 HLA-DRB1/ANXA1/ZC3H12A/GPR183/NFKBIZ/MIR21/SOCS1/SEMA4A/SLAMF6/SASH3/HLA-DRA/CD86/IL18R1/IL12RB1/CD80/RIPK2/LEF1/STAT3/CD83/MALT1/PLA2G2D/NCKAP1L/CCL19/RUNX3/IL23A/IRF4/BCL6/BATF/TMEM98/SMAD7/LY9/SH3RF1/IL6/IFNG 34

BP GO:1903555 regulation of tumor necrosis factor superfamily cytokine production 53/2416 164/18862 6.00980286072893e-11 3.61802273231762e-09 2.52085829724355e-09 IRAK3/ZC3H12A/CX3CL1/NOD2/NR1H4/LILRB1/PTAFR/TWIST1/CD274/SIRPA/PTPRC/IL33/SYT11/CD34/PF4/SASH3/CD86/CD2/MAPKAPK2/FZD5/UBE2J1/JAK2/RIPK2/RASGRP1/STAT3/SLAMF1/CLU/LY96/CLEC4A/TLR2/CCL19/IL27RA/LTF/MIF/TLR1/CD36/IL23A/MAVS/IL1A/TYROBP/LPL/LILRA2/NLRC3/CD14/PTPN6/WNT5A/IFNGR1/ZFP36/IL6/TNFAIP3/IFNG/TLR4/CD33 53

BP GO:0009615 response to virus 91/2416 359/18862 6.40329270849892e-11 3.81636245426536e-09 2.6590515510556e-09 DUOX2/APOBEC3B/IRAK3/IFI16/IFITM3/MMP12/RNF135/IFITM2/ISG20/CXCL9/PARP9/HIF1A/FGR/ZBP1/IFITM1/CCL11/TRAF3IP2/BIRC3/TRIM22/DMBT1/SEC14L1/ZC3H12A/CD40/GBP1/OAS2/STAT1/SLFN11/PIM2/KCNJ8/LILRB1/IRF9/MIR21/AIM2/IRF1/PTPRC/IL33/MLKL/IFIT3/AKAP1/MICB/CXCL10/IFNAR2/DDIT4/HTRA1/IL2RA/BATF3/CCL22/IL12RB1/CCL4/SLFN13/IFI44/CLU/HYAL2/APOBEC3G/FOSL1/NMI/CXCR4/POU2AF1/CCL19/RNASE6/IL23A/MAVS/FCN3/NLRP1/BST2/NLRC5/PMAIP1/TLR8/ISG15/DDX21/MX2/TNF/FLNA/PRF1/RNASE2/TSPAN6/IFNGR1/CD207/IL6/F2RL1/TNFAIP3/BNIP3/IFNG/RTP4/OASL/H19/ZDHHC11/HYAL1/IFIT2/IFI44L/CXCL12 91

BP GO:0055074 calcium ion homeostasis 108/2416 454/18862 6.8522913064705e-11 4.0435303155014e-09 2.81733081855405e-09 CD55/CXCL9/THY1/TGM2/EDN2/LYN/SRI/GNA15/CCL11/SNX10/PLCE1/CD40/ADM/CX3CL1/TMEM38B/HSP90B1/FPR1/FYN/GJA1/SLC25A23/UBASH3B/F2RL2/PTPRC/PTGDR/CAMK2N1/PROK2/APLNR/CXCL10/CXCL11/RAMP3/REG1A/CDH5/CXCL13/CD38/EDN1/P2RY1/CCR6/SLC24A3/CORO1A/JAK2/GRINA/EDN3/AFG3L2/CALR/TRIM24/TRPV1/CLIC2/P2RY8/STC1/CAV1/EDNRA/CXCR2/ITPR1/GPR65/FAM20A/P2RX5/CXCR4/LCK/HERPUD1/CCL21/CCL19/CCR7/CXCR6/S1PR1/GOT1/TMEM38A/WFS1/CIB2/CD36/GPR4/CD52/CCL13/PLCG2/CYP27B1/CD19/MS4A1/S1PR3/FGF2/CCR1/TNFSF11/C3AR1/SWAP70/MCOLN2/CYSLTR1/ITGAV/P2RX4/CXCR1/FAM155A/TRPM4/C5AR1/PTPN6/PTGFR/WNT5A/PKD2/F2RL1/BNIP3/SLC30A1/GPR18/CCR5/CAV2/ADCYAP1/DHRS7C/GPR35/CCR3/TCIRG1/FPR2/CXCL12/NMU 108

BP GO:0001906 cell killing 56/2416 179/18862 7.25443225096191e-11 4.23886433487578e-09 2.95342984830183e-09 CD55/APOL1/HLA-DRB1/C3/DEFB4A/CTSH/SERPINB9/CXCL6/CTSC/ICAM1/LILRB1/GZMB/PTPRC/CADM1/MR1/IL7R/SLAMF6/PF4/HLA-DRA/VAV1/CFHR2/CORO1A/IL12RB1/NOS2/SH2D1A/RASGRP1/DEFA6/TUBB/S100A12/FCGR2B/DEFA5/CD1C/SLAMF7/LTF/IL23A/CD160/TYROBP/CCL13/GNLY/CRTAM/PTPN6/PRF1/CD1D/SEMG1/LAG3/CD1A/F2RL1/IL18RAP/AZGP1/IFNG/CD1B/KRT6A/LYZ/STAP1/HSP90AB1/CHGA 56

BP GO:0050673 epithelial cell proliferation 103/2416 428/18862 9.37244873785786e-11 5.42328101724591e-09 3.77867248552368e-09 SEMA5A/CDH3/FGFR2/MMP12/SERPINB5/PBLD/SDR16C5/HIF1A/CCL11/TNMD/LAMC1/SULF1/ACVR2A/STAT1/AQP11/CDKN2B/PPARG/HOXA5/NOD2/TGFA/XBP1/CCL2/ROBO1/GJA1/VEGFC/MIR21/TWIST1/SPARC/CFLAR/PROK2/F3/CD34/APLNR/IFT74/IL26/CLDN1/MARVELD3/HTRA1/TEK/VDR/REG1A/IGFBP5/PPP1R16B/HES5/CEBPB/TIE1/REG3A/EGR3/APOH/OVOL2/FAP/SERPINF1/CAV1/KDR/AREG/SULF2/PTPRM/IHH/HGF/NME1/DUSP10/FGF9/ALDH1A2/EPHA2/IRF6/RUNX3/NR4A3/APLN/LAMB1/BMP5/MCC/FUT1/ESRP2/PIK3CD/FGF2/TNFSF11/MMP14/LRG1/NLRC3/NRARP/ITGA4/TNF/FBXW7/C5AR1/ECM1/WNT5A/ZFP36/IL6/TNFAIP3/STAT5A/CAV2/TLR4/HYAL1/XDH/MST1/CCR3/SFRP2/WNT2/ERRFI1/CXCL12/SNAI2/OSR1/RETNLB 103

BP GO:0002706 regulation of lymphocyte mediated immunity 51/2416 157/18862 1.11384800261051e-10 6.38320586111405e-09 4.44750037479600e-09 C4BPB/HLA-DRB1/IL1B/C3/CD40/SERPINB9/NOD2/LILRB1/PTPRC/CADM1/MR1/IL7R/SLAMF6/SASH3/HLA-DRA/TNFRSF1B/IL18R1/VAV1/FZD5/IL12RB1/CR1/SH2D1A/RASGRP1/BTK/C4BPA/CLCF1/MALT1/FCGR2B/MAD2L2/CD1C/IL27RA/IL1R1/LILRB4/WAS/IL23A/CD160/TNFSF13/LTA/CRTAM/BCL6/SMAD7/TNF/TRPM4/PTPN6/CD1D/LAG3/IL6/CD1A/IL18RAP/AZGP1/CD1B 51

BP GO:0032640 tumor necrosis factor production 52/2416 162/18862 1.20242698794483e-10 6.77708616466999e-09 4.72193658064696e-09 IRAK3/SPHK2/ZC3H12A/CX3CL1/NOD2/NR1H4/LILRB1/PTAFR/TWIST1/SIRPA/PTPRC/IL33/SYT11/CD34/PF4/SASH3/CD2/MAPKAPK2/FZD5/UBE2J1/JAK2/RIPK2/RASGRP1/STAT3/SLAMF1/CLU/LY96/CLEC4A/TLR2/CCL19/IL27RA/LTF/MIF/TLR1/CD36/IL23A/MAVS/IL1A/TYROBP/LPL/LILRA2/NLRC3/CD14/PTPN6/WNT5A/IFNGR1/ZFP36/IL6/TNFAIP3/IFNG/TLR4/CD33 52

BP GO:0002429 immune response-activating cell surface receptor signaling pathway 112/2416 481/18862 1.2166916436572e-10 6.77708616466999e-09 4.72193658064696e-09 BTN3A3/PSMB9/THY1/LYN/IGKC/FGR/HLA-DRB1/ZC3H12A/GBP1/NFKBIZ/IGLV2-23/ICAM2/IGLV3-19/LAX1/FPR1/IGHM/FYN/LAPTM5/BTN3A1/PTPRC/IGLV1-44/MUC1/CTLA4/CD79A/VAV3/ELMO1/MICB/TRBC1/HLA-DRA/MNDA/PDE4B/LCP2/VAV1/CD38/PAG1/TRAC/RFTN1/CLEC4E/BTN2A2/CR1/APPL2/SH2D1A/RIPK2/BTK/ADA/IGLV6-57/FCN1/WIPF1/FCER1G/ITK/KLHL6/IGHG1/BTN3A2/HHLA2/MALT1/LCK/ARPC1B/PSMB8/FCGR2B/NCKAP1L/CLEC4A/IGKV3-20/IGKV4-1/CCR7/FCRL3/WASL/CD3D/LILRB4/NR4A3/IGHV1-69/WIPF2/WAS/BTNL3/CD160/TYROBP/HLA-DPA1/HCK/PLCG2/PIK3CD/CD19/MS4A1/LILRA2/PRKACB/FCGR1A/C3AR1/PRKCH/CD300A/CD3G/PRKCQ/HLA-DPB1/C5AR1/PTPN6/CD247/CD3E/CD22/SKAP1/MUC20/IGHD/TRAT1/IGKV1-5/CR2/CLEC4D/FCGR2A/HLA-DQB1/PSMA8/PAX5/STAP1/HSP90AB1/FPR2/MUCL1/BTNL8/HLA-DQA1 112

BP GO:0002757 immune response-activating signal transduction 112/2416 481/18862 1.2166916436572e-10 6.77708616466999e-09 4.72193658064696e-09 BTN3A3/PSMB9/THY1/LYN/IGKC/FGR/HLA-DRB1/ZC3H12A/GBP1/NFKBIZ/IGLV2-23/ICAM2/IGLV3-19/LAX1/FPR1/IGHM/FYN/LAPTM5/BTN3A1/PTPRC/IGLV1-44/MUC1/CTLA4/CD79A/VAV3/ELMO1/MICB/TRBC1/HLA-DRA/MNDA/PDE4B/LCP2/VAV1/CD38/PAG1/TRAC/RFTN1/CLEC4E/BTN2A2/CR1/APPL2/SH2D1A/RIPK2/BTK/ADA/IGLV6-57/FCN1/WIPF1/FCER1G/ITK/KLHL6/IGHG1/BTN3A2/HHLA2/MALT1/LCK/ARPC1B/PSMB8/FCGR2B/NCKAP1L/CLEC4A/IGKV3-20/IGKV4-1/CCR7/FCRL3/WASL/CD3D/LILRB4/NR4A3/IGHV1-69/WIPF2/WAS/BTNL3/CD160/TYROBP/HLA-DPA1/HCK/PLCG2/PIK3CD/CD19/MS4A1/LILRA2/PRKACB/FCGR1A/C3AR1/PRKCH/CD300A/CD3G/PRKCQ/HLA-DPB1/C5AR1/PTPN6/CD247/CD3E/CD22/SKAP1/MUC20/IGHD/TRAT1/IGKV1-5/CR2/CLEC4D/FCGR2A/HLA-DQB1/PSMA8/PAX5/STAP1/HSP90AB1/FPR2/MUCL1/BTNL8/HLA-DQA1 112

BP GO:0018108 peptidyl-tyrosine phosphorylation 92/2416 369/18862 1.30469687785105e-10 7.19999388147431e-09 5.0165976443688e-09 FGFR2/LRP8/ITGA5/THY1/PARP9/LYN/PECAM1/FGR/GREM1/HCLS1/CD40/FGFR3/LTK/SH3BP5/EFNA5/ICAM1/ITGB2/NOD2/CD44/TGFA/FYN/SOCS3/EFNA1/SOCS1/PTPRC/INSR/AFAP1L2/PDGFRB/CD74/TEK/ERBB3/HES5/DGKQ/TIE1/JAK2/CD80/AGT/RIPK2/STAT3/BTK/CAV1/SEMA4D/HYAL2/KDR/ITK/SAMSN1/AREG/CBLC/CLCF1/DDR2/LCK/DYRK2/STAP2/HGF/IL24/BANK1/PTK6/EPHA2/LILRB4/ENPP2/MIF/EFEMP1/CSF1R/CD36/IL23A/HCK/DUSP22/TESK2/PKDCC/FCGR1A/CD300A/PARP14/TNF/FBXW7/PTPN6/GHR/CD3E/NRG1/LIF/IL6/DDR1/IFNG/SH2B3/LRP4/STAP1/OSM/SFRP2/IL11/MAP2K6/ERRFI1/CSF3/RELN 92

BP GO:0050730 regulation of peptidyl-tyrosine phosphorylation 72/2416 262/18862 1.34291767636778e-10 7.34292601023117e-09 5.1161856429463e-09 LRP8/ITGA5/THY1/PARP9/LYN/PECAM1/GREM1/HCLS1/CD40/FGFR3/SH3BP5/EFNA5/ICAM1/ITGB2/NOD2/CD44/TGFA/FYN/SOCS3/EFNA1/SOCS1/PTPRC/AFAP1L2/CD74/ERBB3/HES5/DGKQ/JAK2/CD80/AGT/RIPK2/STAT3/CAV1/SEMA4D/HYAL2/SAMSN1/AREG/CBLC/CLCF1/STAP2/HGF/IL24/BANK1/PTK6/LILRB4/ENPP2/MIF/CSF1R/CD36/IL23A/DUSP22/FCGR1A/CD300A/PARP14/TNF/FBXW7/PTPN6/GHR/CD3E/NRG1/LIF/IL6/IFNG/SH2B3/LRP4/STAP1/OSM/SFRP2/IL11/ERRFI1/CSF3/RELN 72

BP GO:1902107 positive regulation of leukocyte differentiation 50/2416 154/18862 1.72595728893297e-10 9.25831969586674e-09 6.45073670084675e-09 VNN1/HLA-DRB1/ANXA1/HCLS1/LILRB2/NFKBIZ/XBP1/PCK1/MIR21/SOCS1/PTPRC/IL7R/CD74/PF4/SASH3/HLA-DRA/CD86/IL2RA/IL12RB1/EGR3/CR1/CD80/RIPK2/LEF1/BTK/ADA/RHOH/CD27/CD83/MALT1/IHH/EVI2B/NCKAP1L/DUSP10/CCL19/TNFSF9/RUNX3/LILRB4/IL23A/TYROBP/CA2/BCL6/CCR1/TNFSF11/MMP14/PNP/TNF/FOS/LIF/IFNG 50

BP GO:1903708 positive regulation of hemopoiesis 50/2416 154/18862 1.72595728893297e-10 9.25831969586674e-09 6.45073670084675e-09 VNN1/HLA-DRB1/ANXA1/HCLS1/LILRB2/NFKBIZ/XBP1/PCK1/MIR21/SOCS1/PTPRC/IL7R/CD74/PF4/SASH3/HLA-DRA/CD86/IL2RA/IL12RB1/EGR3/CR1/CD80/RIPK2/LEF1/BTK/ADA/RHOH/CD27/CD83/MALT1/IHH/EVI2B/NCKAP1L/DUSP10/CCL19/TNFSF9/RUNX3/LILRB4/IL23A/TYROBP/CA2/BCL6/CCR1/TNFSF11/MMP14/PNP/TNF/FOS/LIF/IFNG 50

BP GO:0072329 monocarboxylic acid catabolic process 45/2416 131/18862 1.73981846633737e-10 9.25831969586674e-09 6.45073670084675e-09 ACOX1/AMACR/PHYH/ACADS/CPT1A/ACOX2/ETFDH/ACOT8/LDHD/CYP4F2/ABCB11/LPIN1/PCK2/CPT2/CROT/IRS1/ACAT1/ACAA1/PCK1/TWIST1/ACAA2/BDH2/CRAT/CYP4F12/MLYCD/CRYL1/PECR/EHHADH/DECR2/HADH/ECH1/SORD/AUH/ACADM/FAAH/HADHA/PGD/ABCD3/ABHD3/SLC27A4/FABP1/SLC27A2/ETFA/DCXR/PON3 45

BP GO:0032680 regulation of tumor necrosis factor production 51/2416 160/18862 2.39717511428824e-10 1.26435076824406e-08 8.80936732730983e-09 IRAK3/ZC3H12A/CX3CL1/NOD2/NR1H4/LILRB1/PTAFR/TWIST1/SIRPA/PTPRC/IL33/SYT11/CD34/PF4/SASH3/CD2/MAPKAPK2/FZD5/UBE2J1/JAK2/RIPK2/RASGRP1/STAT3/SLAMF1/CLU/LY96/CLEC4A/TLR2/CCL19/IL27RA/LTF/MIF/TLR1/CD36/IL23A/MAVS/IL1A/TYROBP/LPL/LILRA2/NLRC3/CD14/PTPN6/WNT5A/IFNGR1/ZFP36/IL6/TNFAIP3/IFNG/TLR4/CD33 51

BP GO:0050920 regulation of chemotaxis 64/2416 224/18862 2.45510639824151e-10 1.28354685381749e-08 8.94311610439774e-09 SEMA5A/EDN2/LYN/GREM1/PADI2/GPR183/NOD2/CCL2/ROBO1/STX3/VEGFC/ANGPT2/RAC2/SEMA4A/PDGFRB/F3/CD74/MYCBP2/CXCL10/SLAMF8/CXCL13/EDN1/CCR6/GPSM3/ZSWIM5/EDN3/CCL4/CALR/RARRES2/SEMA6A/SEMA4D/MMP28/KDR/SEMA3E/PLA2G7/DAPK2/CXCR4/CCL21/NCKAP1L/CXCL17/CCL19/CCR7/AIF1/S1PR1/MIF/CSF1R/IL23A/FGF2/CCR1/C3AR1/SWAP70/P2RX4/C5AR1/SEMA6D/ITGA2/WNT5A/IL6/SERPINE1/S100A7/F2RL1/STAP1/MST1/FPR2/CXCL12 64

BP GO:0051897 positive regulation of protein kinase B signaling 54/2416 175/18862 2.79536414053725e-10 1.44872785022626e-08 1.009401513448e-08 GCNT2/SEMA5A/CHI3L1/FGFR2/HCLS1/FERMT2/FGFR3/IRS1/CX3CL1/TGFA/FYN/MIR21/INSR/RAC2/GAB1/PDGFRB/F3/CD86/IL26/TEK/VAV1/ICOS/RAMP3/OSBPL8/IGFBP5/ERBB3/CD80/PINK1/KLB/AREG/LCK/PIK3R5/CCL21/HGF/FGF9/PIK3AP1/CCL19/CCR7/PIK3CD/CD19/FGF2/TNFSF11/FAM110C/P2RX4/ENG/TNF/NRG1/TRAT1/TSPYL5/AKR1C3/H19/OSM/HSP90AB1/CSF3 54

BP GO:0042116 macrophage activation 38/2416 102/18862 3.10147368619082e-10 1.59351579049114e-08 1.11028254918537e-08 EDN2/ZC3H12A/DYSF/CX3CL1/CST7/CTSC/ITGB2/PTPRC/IL33/SYT11/CD74/CD93/LRFN5/JAK2/CRTC3/CEBPA/CLU/GPR137B/NMI/FCGR2B/TLR2/AIF1/LRRK2/MIF/TLR1/TYROBP/TLR8/SPHK1/TNF/C5AR1/WNT5A/IFI35/IFNGR1/IL6/IFNG/TLR4/STAP1/FPR2 38

BP GO:0007204 positive regulation of cytosolic calcium ion concentration 80/2416 310/18862 3.6434782118836e-10 1.85599402930139e-08 1.29316433161321e-08 CD55/CXCL9/THY1/TGM2/EDN2/LYN/SRI/GNA15/PLCE1/ADM/CX3CL1/TMEM38B/FPR1/FYN/GJA1/UBASH3B/F2RL2/PTPRC/PTGDR/PROK2/APLNR/CXCL10/CXCL11/RAMP3/CXCL13/CD38/EDN1/P2RY1/CCR6/CORO1A/JAK2/TRPV1/CLIC2/P2RY8/CAV1/EDNRA/CXCR2/ITPR1/GPR65/P2RX5/CXCR4/LCK/CCL21/CCL19/CCR7/CXCR6/S1PR1/TMEM38A/CIB2/CD36/GPR4/CD52/PLCG2/CD19/MS4A1/S1PR3/FGF2/CCR1/C3AR1/SWAP70/MCOLN2/CYSLTR1/ITGAV/P2RX4/CXCR1/FAM155A/TRPM4/C5AR1/PTPN6/PTGFR/PKD2/F2RL1/GPR18/CCR5/ADCYAP1/DHRS7C/GPR35/CCR3/FPR2/NMU 80

BP GO:0043491 protein kinase B signaling 73/2416 273/18862 3.87536170197964e-10 1.95738607998294e-08 1.36380926978677e-08 GCNT2/SEMA5A/CHI3L1/PHLPP2/FGFR2/PIK3R3/MAGI2/IL1B/HCLS1/FERMT2/CD40/FGFR3/IRS1/MT3/CX3CL1/TGFA/CCL2/FYN/MIR21/INSR/RAC2/SLC9A3R1/GAB1/PDGFRB/F3/CD86/IL26/TEK/VAV1/ICOS/RAMP3/OSBPL8/IGFBP5/ERBB3/CD80/PINK1/KLB/HYAL2/KDR/AREG/LCK/PIK3R5/CCL21/HGF/PEAR1/BANK1/FGF9/PIK3AP1/CCL19/CCR7/EPHA2/RCN3/PIK3CD/CD19/FGF2/TNFSF11/FAM110C/P2RX4/ENG/TNF/NRG1/MTM1/PHLPP1/TRAT1/TSPYL5/KLF4/AKR1C3/SH2B3/H19/XDH/OSM/HSP90AB1/CSF3 73

BP GO:0046635 positive regulation of alpha-beta T cell activation 29/2416 66/18862 4.06558358554956e-10 2.03620824956936e-08 1.418728637328e-08 CD55/HLA-DRB1/ANXA1/NFKBIZ/MIR21/SOCS1/PTPRC/SASH3/HLA-DRA/CD86/IL12RB1/CD80/RIPK2/ADA/CD83/MALT1/IHH/NCKAP1L/CCL19/RUNX3/LILRB4/IL23A/CD160/PNP/PRKCQ/EBI3/CD3E/RASAL3/IFNG 29

BP GO:0070665 positive regulation of leukocyte proliferation 48/2416 148/18862 4.14408196983472e-10 2.05822737835125e-08 1.43407047114017e-08 CD55/VCAM1/LYN/IL1B/ANXA1/LILRB2/CD40/GPR183/MIR21/CD274/PTPRC/TNFSF13B/VAV3/CD74/SASH3/CD86/CD38/IL2RA/CORO1A/IL12RB1/HLA-DMB/CD80/RIPK2/ADA/HHLA2/CLCF1/NCKAP1L/CCL19/FCRL3/AIF1/IL27RA/TNFSF9/MIF/CSF1R/IL23A/IL1A/HLA-DPA1/BCL6/BST2/PNP/PRKCQ/HLA-DPB1/EBI3/CD1D/CD3E/IL6/RASAL3/TLR4 48

BP GO:0032611 interleukin-1 beta production 39/2416 108/18862 5.31320426231638e-10 2.6054789529879e-08 1.81536815074837e-08 IFI16/CASP1/ZC3H12A/CX3CL1/NOD2/AIM2/GBP5/SIRPA/MNDA/PYHIN1/FZD5/JAK2/RIPK2/STAT3/EGR1/MALT1/CCL19/CCR7/LILRB4/CD36/TYROBP/LPL/NLRP7/PANX1/CARD8/NLRP1/S1PR3/LILRA2/TLR8/SPHK1/TNF/WNT5A/IL6/F2RL1/TNFAIP3/IFNG/TLR4/CD33/ERRFI1 39

BP GO:0050671 positive regulation of lymphocyte proliferation 45/2416 135/18862 5.33336295745846e-10 2.6054789529879e-08 1.81536815074837e-08 CD55/VCAM1/IL1B/ANXA1/LILRB2/CD40/GPR183/MIR21/CD274/PTPRC/TNFSF13B/VAV3/CD74/SASH3/CD86/CD38/IL2RA/CORO1A/IL12RB1/HLA-DMB/CD80/RIPK2/ADA/HHLA2/CLCF1/NCKAP1L/CCL19/FCRL3/AIF1/IL27RA/TNFSF9/MIF/IL23A/IL1A/HLA-DPA1/BCL6/PNP/PRKCQ/HLA-DPB1/EBI3/CD1D/CD3E/IL6/RASAL3/TLR4 45

BP GO:0032612 interleukin-1 production 43/2416 126/18862 5.5617935509797e-10 2.69498289136902e-08 1.87773004352716e-08 IFI16/CASP1/ANXA1/ZC3H12A/CX3CL1/NOD2/NR1H4/AIM2/GBP5/SIRPA/MNDA/PYHIN1/FZD5/JAK2/RIPK2/STAT3/EGR1/MALT1/CCL19/CCR7/LILRB4/CD36/TYROBP/LPL/NLRP7/PANX1/CARD8/NLRP1/S1PR3/LILRA2/TLR8/SPHK1/TNF/WNT5A/IL6/IGHD/F2RL1/TNFAIP3/IFNG/TLR4/CD33/IL1R2/ERRFI1 43

BP GO:0050731 positive regulation of peptidyl-tyrosine phosphorylation 57/2416 193/18862 5.88829975523735e-10 2.83018278558182e-08 1.97193060563764e-08 LRP8/ITGA5/PARP9/LYN/PECAM1/GREM1/HCLS1/CD40/FGFR3/EFNA5/ICAM1/NOD2/CD44/TGFA/FYN/SOCS3/EFNA1/PTPRC/AFAP1L2/CD74/ERBB3/HES5/DGKQ/JAK2/CD80/AGT/RIPK2/STAT3/SEMA4D/AREG/CLCF1/STAP2/HGF/IL24/BANK1/PTK6/ENPP2/MIF/CSF1R/CD36/IL23A/FCGR1A/PARP14/TNF/FBXW7/GHR/CD3E/NRG1/LIF/IL6/IFNG/LRP4/STAP1/OSM/IL11/CSF3/RELN 57

BP GO:0072593 reactive oxygen species metabolic process 74/2416 281/18862 6.23169032971386e-10 2.97126994920757e-08 2.07023312427126e-08 DUOX2/MMP3/ACOX1/DUOXA2/PRDX4/HIF1A/SLC25A33/IL1B/DUOXA1/SPHK2/ZC3H12A/NCF2/MT3/DDAH2/PRDX6/ICAM1/ITGB2/SLC30A10/FYN/MIR21/SIRPA/INSR/RAC2/CFLAR/PDGFRB/CD34/DDIT4/NQO2/VAV1/EDN1/JAK2/ASS1/AGT/NOS2/PINK1/NCF4/CAV1/SH3PXD2B/CLU/BMP7/PDK4/PXDN/SOD2/GNAI2/TLR2/PREX1/LRRK2/SPR/MPV17L/CD36/FBLN5/TYROBP/PTGS2/PMAIP1/RFK/P2RX4/TNF/HVCN1/PKD2/CAT/F2RL1/BNIP3/KLF4/IFNG/AKR1C3/SOD3/PON3/TLR4/H19/XDH/HSP90AB1/FPR2/CD177/CPS1 74

BP GO:0032946 positive regulation of mononuclear cell proliferation 45/2416 136/18862 6.99158823253938e-10 3.30713221158212e-08 2.30424524455872e-08 CD55/VCAM1/IL1B/ANXA1/LILRB2/CD40/GPR183/MIR21/CD274/PTPRC/TNFSF13B/VAV3/CD74/SASH3/CD86/CD38/IL2RA/CORO1A/IL12RB1/HLA-DMB/CD80/RIPK2/ADA/HHLA2/CLCF1/NCKAP1L/CCL19/FCRL3/AIF1/IL27RA/TNFSF9/MIF/IL23A/IL1A/HLA-DPA1/BCL6/PNP/PRKCQ/HLA-DPB1/EBI3/CD1D/CD3E/IL6/RASAL3/TLR4 45

BP GO:0072676 lymphocyte migration 41/2416 118/18862 7.49129411377998e-10 3.51559944237234e-08 2.44949484283979e-08 MSN/CCL11/PADI2/GPR183/CX3CL1/CH25H/ICAM1/SPNS2/CCL2/CCL18/CXCL10/CXCL11/CXCL13/CCL20/CCR6/CCL22/CCL4/ITGAL/DOCK8/MADCAM1/CXCL16/CCL21/CCL19/CCR7/AIF1/IL27RA/STK10/S1PR1/WASL/CCL13/PIK3CD/CRTAM/ITGA4/ECM1/WNT5A/CKLF/JAM2/S100A7/APOD/C10orf99/CXCL12 41

BP GO:0044242 cellular lipid catabolic process 64/2416 230/18862 8.09534485841256e-10 3.76939494969835e-08 2.62632692980572e-08 ACOX1/LIPC/AMACR/GBA3/PHYH/ACADS/ABHD5/CPT1A/ACOX2/ETFDH/ACOT8/ABCB11/LPIN1/PCK2/CPT2/CROT/IRS1/PNLIPRP2/ACAT1/MT3/PRDX6/ACAA1/PCK1/TWIST1/ACAA2/GPCPD1/BDH2/FABP3/CRAT/MLYCD/PPT1/PECR/EHHADH/DECR2/NEU4/HADH/ECH1/SRD5A3/PLA2G7/AUH/ACADM/FAAH/LIPG/HADHA/FABP2/ENPP2/ABCD3/ABHD3/AKR1B10/GDPD3/PLCG2/LPL/MGLL/SLC27A4/NAPEPLD/FABP1/SPHK1/APOC1/SLC27A2/APOC2/ETFA/AKR1C3/FABP4/CPS1 64

BP GO:0034113 heterotypic cell-cell adhesion 27/2416 60/18862 8.45180176084751e-10 3.90486344919776e-08 2.7207146427208e-08 GCNT2/VCAM1/ITGA5/THY1/IL1B/LILRB2/ITGB2/CD44/ITGAX/SIRPA/PTPRC/CD2/IL1RN/CEACAM6/BMP7/MADCAM1/LCK/ITGAV/ITGA4/TNF/MYADM/CD1D/DSC2/SKAP1/DSP/KLF4/CXADR 27

BP GO:0008360 regulation of cell shape 48/2416 151/18862 8.89240649893857e-10 4.07682636412876e-08 2.84052984925609e-08 RHOU/PDPN/MSN/FGR/CCL11/ANXA1/FERMT2/ICAM1/ITGB2/CCL2/FYN/MIR21/PLXNA2/LST1/RAC2/VIL1/SEMA4A/SLC9A3R1/PALMD/RHOJ/DNMBP/EPB41L3/P2RY1/CORO1A/ARHGAP15/PLXND1/SEMA4D/RHOH/KDR/SEMA3E/FMNL1/FMNL3/MYH10/PLEKHO1/RHOQ/PARVB/CSF1R/SHROOM3/HCK/CCL13/FGD3/FBLIM1/FGD5/ERMN/FN1/RND1/BAMBI/CDC42EP5 48

BP GO:0034440 lipid oxidation 39/2416 110/18862 9.86777722670729e-10 4.48946200543324e-08 3.12803384165209e-08 ACOX1/AMACR/PHYH/ACADS/CPT1A/ACOX2/ETFDH/ACOT8/ABCB11/CPT2/PPARGC1A/CROT/IRS1/ACAT1/PPARG/ACAA1/TWIST1/ACAA2/BDH2/FABP3/CRAT/MLYCD/PECR/EHHADH/DECR2/HADH/APPL2/ECH1/PLA2G7/PDK4/AUH/ACADM/HADHA/ABCD3/NR4A3/FABP1/SLC27A2/ETFA/APOD 39

BP GO:0019730 antimicrobial humoral response 46/2416 142/18862 9.95025847909641e-10 4.49269246480413e-08 3.13028466507459e-08 LCN2/PI3/CXCL1/CXCL3/S100A8/PLA2G2A/CXCL9/CXCL2/DEFB1/DEFB4A/DMBT1/S100A9/CXCL6/NOD2/IGHM/PF4/CXCL10/CXCL11/REG1A/CXCL13/KLK3/LEAP2/REG3A/RARRES2/DEFA6/CLU/S100A12/SPINK5/DEFA5/SLPI/IGKV3-20/GATA6/LTF/RNASE6/REG1B/CCL13/GNLY/CXCL5/SEMG1/S100A7/PRSS3/KRT6A/LYZ/PPBP/KLK7/CHGA 46

BP GO:0098754 detoxification 45/2416 138/18862 1.18869886849149e-09 5.32680094451824e-08 3.71144996929079e-08 DUOX2/GPX8/ABCG2/SLC22A5/PRDX4/MT3/S100A9/PRDX6/SLC30A10/MIR21/MT1G/MT1F/MT1M/PTGES/CLIC2/APOM/BMP7/GPX7/MT1E/PXDN/IYD/SOD2/NXN/CD36/FBLN5/AKR1B10/PTGS2/MT1X/FABP1/MT2A/PDZK1/IPCEF1/GSTA1/SLC22A18/CAT/SLC15A2/SLC30A1/GSTO2/GPX2/SOD3/AKR7A3/MGST1/H19/ALOX5AP/GSTT1 45

BP GO:0002286 T cell activation involved in immune response 39/2416 111/18862 1.33480729599896e-09 5.89292702529912e-08 4.10589846605529e-08 HLA-DRB1/ANXA1/EOMES/ZC3H12A/GPR183/NFKBIZ/ICAM1/LILRB1/PCK1/MIR21/SEMA4A/SLAMF6/CD74/HLA-DRA/CD86/IL18R1/IL12RB1/HLA-DMB/CD80/RIPK2/LEF1/STAT3/LCP1/ITGAL/FCER1G/MALT1/FCGR2B/CD1C/CCL19/IL23A/IRF4/BCL6/BATF/TMEM98/SMAD7/LY9/IL6/F2RL1/IFNG 39

BP GO:0071675 regulation of mononuclear cell migration 39/2416 111/18862 1.33480729599896e-09 5.89292702529912e-08 4.10589846605529e-08 MSN/LYN/GREM1/PADI2/CCL2/CXCL10/SLAMF8/CXCL13/CCL20/CCR6/CCL4/CALR/RARRES2/DOCK8/PLA2G7/MADCAM1/CCL21/CXCL17/CCR7/AIF1/IL27RA/STK10/WASL/CSF1R/BMP5/CCR1/C3AR1/ITGA4/TNF/C5AR1/ECM1/WNT5A/JAM2/SERPINE1/S100A7/APOD/C10orf99/FPR2/CXCL12 39

BP GO:0007599 hemostasis 85/2416 346/18862 1.42353309387824e-09 6.23842444081934e-08 4.34662388184958e-08 SERPINA1/PDPN/C4BPB/LYN/ANXA5/GNA15/CYP4F2/SERPING1/SELP/COL1A2/CD40/MAFF/ENTPD1/FYN/EHD3/IRF1/UBASH3B/F2RL2/PLAU/VAV3/SLC7A11/AK3/F3/PLAUR/CD34/PF4/AKAP1/THBD/LCP2/VAV1/COL3A1/TFPI/EDN1/P2RY1/DOCK11/ZFPM2/DGKQ/HNF4A/JAK2/APOH/FAP/PLEK/CAV1/STXBP1/ITPR1/DOCK8/FCER1G/P2RX5/LCK/GNA11/VWF/PIK3R5/COL1A1/F5/PEAR1/GATA6/WAS/CD36/EHD2/PROCR/PLCG2/PRKACB/PRKCH/PRKCQ/P2RX4/PTPN6/FLNA/ITGA2/KLKB1/FERMT3/ST3GAL4/PRKAR2B/IL6/FN1/SERPINE1/F2RL1/MYL9/MMRN1/TLR4/TFPI2/SH2B3/ZNF385A/PRKAR1A/F13A1/CD177 85

BP GO:0002292 T cell differentiation involved in immune response 30/2416 73/18862 1.46468049460956e-09 6.37189470647663e-08 4.43961932480578e-08 HLA-DRB1/ANXA1/EOMES/ZC3H12A/GPR183/NFKBIZ/PCK1/MIR21/SEMA4A/SLAMF6/HLA-DRA/CD86/IL18R1/IL12RB1/CD80/RIPK2/LEF1/STAT3/FCER1G/MALT1/CCL19/IL23A/IRF4/BCL6/BATF/TMEM98/SMAD7/LY9/IL6/IFNG 30

BP GO:0051607 defense response to virus 69/2416 260/18862 1.65009359074612e-09 7.03632336572734e-08 4.90256016916185e-08 APOBEC3B/IFI16/IFITM3/MMP12/RNF135/IFITM2/ISG20/CXCL9/PARP9/ZBP1/IFITM1/TRAF3IP2/BIRC3/TRIM22/DMBT1/SEC14L1/ZC3H12A/CD40/GBP1/OAS2/STAT1/SLFN11/KCNJ8/LILRB1/IRF9/AIM2/IRF1/PTPRC/IL33/MLKL/IFIT3/AKAP1/MICB/CXCL10/IFNAR2/DDIT4/HTRA1/IL2RA/IL12RB1/SLFN13/HYAL2/APOBEC3G/RNASE6/IL23A/MAVS/FCN3/NLRP1/BST2/NLRC5/PMAIP1/TLR8/ISG15/DDX21/MX2/FLNA/PRF1/RNASE2/TSPAN6/CD207/IL6/F2RL1/TNFAIP3/BNIP3/IFNG/RTP4/OASL/ZDHHC11/IFIT2/IFI44L 69

BP GO:0140546 defense response to symbiont 69/2416 260/18862 1.65009359074612e-09 7.03632336572734e-08 4.90256016916185e-08 APOBEC3B/IFI16/IFITM3/MMP12/RNF135/IFITM2/ISG20/CXCL9/PARP9/ZBP1/IFITM1/TRAF3IP2/BIRC3/TRIM22/DMBT1/SEC14L1/ZC3H12A/CD40/GBP1/OAS2/STAT1/SLFN11/KCNJ8/LILRB1/IRF9/AIM2/IRF1/PTPRC/IL33/MLKL/IFIT3/AKAP1/MICB/CXCL10/IFNAR2/DDIT4/HTRA1/IL2RA/IL12RB1/SLFN13/HYAL2/APOBEC3G/RNASE6/IL23A/MAVS/FCN3/NLRP1/BST2/NLRC5/PMAIP1/TLR8/ISG15/DDX21/MX2/FLNA/PRF1/RNASE2/TSPAN6/CD207/IL6/F2RL1/TNFAIP3/BNIP3/IFNG/RTP4/OASL/ZDHHC11/IFIT2/IFI44L 69

BP GO:0050817 coagulation 85/2416 347/18862 1.65282763624468e-09 7.03632336572734e-08 4.90256016916185e-08 SERPINA1/PDPN/C4BPB/LYN/ANXA5/GNA15/CYP4F2/SERPING1/SELP/COL1A2/CD40/MAFF/ENTPD1/FYN/EHD3/IRF1/UBASH3B/F2RL2/PLAU/VAV3/SLC7A11/AK3/F3/PLAUR/CD34/PF4/AKAP1/THBD/LCP2/VAV1/COL3A1/TFPI/EDN1/P2RY1/DOCK11/ZFPM2/DGKQ/HNF4A/JAK2/APOH/FAP/PLEK/CAV1/STXBP1/ITPR1/DOCK8/FCER1G/P2RX5/LCK/GNA11/VWF/PIK3R5/COL1A1/F5/PEAR1/GATA6/WAS/CD36/EHD2/PROCR/PLCG2/PRKACB/PRKCH/PRKCQ/P2RX4/PTPN6/FLNA/ITGA2/KLKB1/FERMT3/SEMG1/ST3GAL4/PRKAR2B/IL6/FN1/SERPINE1/F2RL1/MYL9/MMRN1/TLR4/TFPI2/SH2B3/PRKAR1A/F13A1/CD177 85

BP GO:1903557 positive regulation of tumor necrosis factor superfamily cytokine production 34/2416 90/18862 1.71875963359953e-09 7.26511164273275e-08 5.06196846177688e-08 NOD2/PTAFR/TWIST1/PTPRC/IL33/PF4/SASH3/CD86/CD2/MAPKAPK2/FZD5/JAK2/RIPK2/RASGRP1/STAT3/CLU/LY96/TLR2/CCL19/MIF/TLR1/CD36/IL23A/MAVS/IL1A/TYROBP/LPL/LILRA2/CD14/WNT5A/IFNGR1/IL6/IFNG/TLR4 34

BP GO:0006909 phagocytosis 91/2416 381/18862 1.74849146634436e-09 7.33873883057209e-08 5.11326822440955e-08 C2/C4BPB/TGM2/LYN/PECAM1/IGKC/RAB31/FGR/IL1B/C3/ANXA1/NCF2/HAVCR1/IGLV2-23/DYSF/IGLV3-19/PPARG/ITGB2/NOD2/IGHM/CCL2/FYN/IL15RA/SIRPA/PTPRC/RAC2/IGLV1-44/VAV3/SYT11/ELMO1/TRBC1/CD93/VAV1/CORO1A/CALR/APPL2/NCF4/IGLV6-57/FCN1/WIPF1/SLAMF1/RHOH/ITGAL/C4BPA/RAB34/FCER1G/IGHG1/ARHGAP25/ARPC1B/FCGR2B/NCKAP1L/ANXA3/IGKV3-20/IGKV4-1/PEAR1/TLR2/AIF1/WASL/IGHV1-69/WIPF2/WAS/CD36/TYROBP/FCN3/HCK/PLCG2/CD300LF/FCGR1A/CD300A/CD3G/CEACAM4/ITGAV/SPHK1/CD14/TNF/ITGA2/CD247/SIRPB1/IL2RB/IGHD/F2RL1/SH3BP1/IGKV1-5/IFNG/FCGR2A/IRF8/TLR4/ELMO3/STAP1/HSP90AB1/FPR2 91

BP GO:0007596 blood coagulation 84/2416 342/18862 1.79568238317915e-09 7.48410279982361e-08 5.21455060849596e-08 SERPINA1/PDPN/C4BPB/LYN/ANXA5/GNA15/CYP4F2/SERPING1/SELP/COL1A2/CD40/MAFF/ENTPD1/FYN/EHD3/IRF1/UBASH3B/F2RL2/PLAU/VAV3/SLC7A11/AK3/F3/PLAUR/CD34/PF4/AKAP1/THBD/LCP2/VAV1/COL3A1/TFPI/EDN1/P2RY1/DOCK11/ZFPM2/DGKQ/HNF4A/JAK2/APOH/FAP/PLEK/CAV1/STXBP1/ITPR1/DOCK8/FCER1G/P2RX5/LCK/GNA11/VWF/PIK3R5/COL1A1/F5/PEAR1/GATA6/WAS/CD36/EHD2/PROCR/PLCG2/PRKACB/PRKCH/PRKCQ/P2RX4/PTPN6/FLNA/ITGA2/KLKB1/FERMT3/ST3GAL4/PRKAR2B/IL6/FN1/SERPINE1/F2RL1/MYL9/MMRN1/TLR4/TFPI2/SH2B3/PRKAR1A/F13A1/CD177 84

BP GO:0001774 microglial cell activation 23/2416 47/18862 1.95406552502806e-09 8.07881863731943e-08 5.62891902582571e-08 CX3CL1/CST7/CTSC/ITGB2/PTPRC/IL33/SYT11/JAK2/CLU/TLR2/AIF1/LRRK2/TLR1/TYROBP/TLR8/SPHK1/TNF/C5AR1/IFNGR1/IL6/IFNG/STAP1/FPR2 23

BP GO:0042113 B cell activation 81/2416 326/18862 1.96548440001899e-09 8.07881863731943e-08 5.62891902582571e-08 VCAM1/LYN/IGKC/CD40/GPR183/LAX1/NOD2/IGHM/XBP1/NHEJ1/LAPTM5/PTPRC/TNFSF13B/CTLA4/CD79A/IL7R/VAV3/CD74/SASH3/TRBC1/MNDA/CD86/SLAMF8/CD38/DOCK11/CCR6/CR1/ST3GAL1/LEF1/RASGRP1/BTK/ADA/CD180/HMGB3/CD27/CMTM7/IGHG1/SAMSN1/CLCF1/MALT1/FCGR2B/MAD2L2/NCKAP1L/BANK1/POU2AF1/FCRL3/IL27RA/LGALS1/MIF/IGHV1-69/TYROBP/TNFSF13/PLCG2/HHEX/PIK3CD/CD19/PKN1/MS4A1/BCL6/BST2/MMP14/CD300A/SWAP70/BATF/DNAJB9/ITGA4/TBC1D10C/PTPN6/CD22/FCRL1/INHBA/IL6/ITM2A/IGHD/TNFAIP3/CR2/TLR4/GAPT/TCIRG1/IL11/AHR 81

BP GO:0061844 antimicrobial humoral immune response mediated by antimicrobial peptide 31/2416 78/18862 2.09327739044193e-09 8.54515975824239e-08 5.95384232537376e-08 CXCL1/CXCL3/CXCL9/CXCL2/DEFB1/DEFB4A/S100A9/CXCL6/NOD2/PF4/CXCL10/CXCL11/REG1A/CXCL13/KLK3/REG3A/DEFA6/S100A12/SPINK5/DEFA5/LTF/RNASE6/REG1B/CCL13/GNLY/CXCL5/SEMG1/S100A7/KRT6A/PPBP/KLK7 31

BP GO:0002690 positive regulation of leukocyte chemotaxis 34/2416 91/18862 2.40849756213392e-09 9.76506494579468e-08 6.80381158798305e-08 EDN2/VEGFC/RAC2/CD74/CXCL10/CXCL13/EDN1/CCR6/GPSM3/EDN3/CCL4/CALR/RARRES2/PLA2G7/DAPK2/CCL21/NCKAP1L/CXCL17/CCL19/CCR7/AIF1/CSF1R/IL23A/CCR1/C3AR1/SWAP70/C5AR1/WNT5A/IL6/SERPINE1/S100A7/F2RL1/FPR2/CXCL12 34

BP GO:0032760 positive regulation of tumor necrosis factor production 33/2416 87/18862 2.63324479594813e-09 1.06041479620614e-07 7.38844290186016e-08 NOD2/PTAFR/TWIST1/PTPRC/IL33/PF4/SASH3/CD2/MAPKAPK2/FZD5/JAK2/RIPK2/RASGRP1/STAT3/CLU/LY96/TLR2/CCL19/MIF/TLR1/CD36/IL23A/MAVS/IL1A/TYROBP/LPL/LILRA2/CD14/WNT5A/IFNGR1/IL6/IFNG/TLR4 33

BP GO:0002700 regulation of production of molecular mediator of immune response 46/2416 146/18862 2.72853058018163e-09 1.09119689059026e-07 7.60291722603068e-08 IRAK3/IL1B/SLC7A5/CD40/NOD2/XBP1/LILRB1/LAPTM5/PTPRC/IL33/CD74/SASH3/TNFRSF1B/IL18R1/IL13RA2/FZD5/CR1/BTK/CLCF1/MALT1/SPINK5/FCGR2B/MAD2L2/FCRL3/IL27RA/IL1R1/LILRB4/NR4A3/CD36/MAVS/CD160/TNFSF13/PKN1/BCL6/BST2/SMAD7/DDX21/TNF/TRPM4/WNT5A/CD22/IL6/F2RL1/TRIL/TLR4/KLK7 46

BP GO:0051896 regulation of protein kinase B signaling 66/2416 247/18862 2.74630089913656e-09 1.09119689059026e-07 7.60291722603068e-08 GCNT2/SEMA5A/CHI3L1/PHLPP2/FGFR2/MAGI2/HCLS1/FERMT2/FGFR3/IRS1/CX3CL1/TGFA/FYN/MIR21/INSR/RAC2/SLC9A3R1/GAB1/PDGFRB/F3/CD86/IL26/TEK/VAV1/ICOS/RAMP3/OSBPL8/IGFBP5/ERBB3/CD80/PINK1/KLB/HYAL2/AREG/LCK/PIK3R5/CCL21/HGF/BANK1/FGF9/PIK3AP1/CCL19/CCR7/EPHA2/RCN3/PIK3CD/CD19/FGF2/TNFSF11/FAM110C/P2RX4/ENG/TNF/NRG1/MTM1/PHLPP1/TRAT1/TSPYL5/KLF4/AKR1C3/SH2B3/H19/XDH/OSM/HSP90AB1/CSF3 66

BP GO:0006874 cellular calcium ion homeostasis 101/2416 442/18862 2.91528614195682e-09 1.15066923218958e-07 8.0172909236805e-08 CD55/CXCL9/THY1/TGM2/EDN2/LYN/SRI/GNA15/CCL11/PLCE1/CD40/ADM/CX3CL1/TMEM38B/HSP90B1/FPR1/FYN/GJA1/SLC25A23/UBASH3B/F2RL2/PTPRC/PTGDR/PROK2/APLNR/CXCL10/CXCL11/RAMP3/CDH5/CXCL13/CD38/EDN1/P2RY1/CCR6/SLC24A3/CORO1A/JAK2/GRINA/EDN3/AFG3L2/CALR/TRPV1/CLIC2/P2RY8/STC1/CAV1/EDNRA/CXCR2/ITPR1/GPR65/P2RX5/CXCR4/LCK/HERPUD1/CCL21/CCL19/CCR7/CXCR6/S1PR1/GOT1/TMEM38A/WFS1/CIB2/CD36/GPR4/CD52/CCL13/PLCG2/CD19/MS4A1/S1PR3/FGF2/CCR1/C3AR1/SWAP70/MCOLN2/CYSLTR1/ITGAV/P2RX4/CXCR1/FAM155A/TRPM4/C5AR1/PTPN6/PTGFR/WNT5A/PKD2/F2RL1/BNIP3/SLC30A1/GPR18/CCR5/CAV2/ADCYAP1/DHRS7C/GPR35/CCR3/TCIRG1/FPR2/CXCL12/NMU 101

BP GO:0050678 regulation of epithelial cell proliferation 89/2416 374/18862 3.19482945102927e-09 1.23763902656812e-07 8.62325319641685e-08 SEMA5A/CDH3/FGFR2/MMP12/SERPINB5/PBLD/HIF1A/CCL11/TNMD/LAMC1/SULF1/STAT1/AQP11/CDKN2B/PPARG/HOXA5/NOD2/TGFA/XBP1/CCL2/ROBO1/GJA1/VEGFC/MIR21/TWIST1/SPARC/CFLAR/F3/APLNR/IFT74/IL26/CLDN1/MARVELD3/HTRA1/TEK/VDR/REG1A/PPP1R16B/HES5/TIE1/REG3A/EGR3/APOH/OVOL2/SERPINF1/CAV1/KDR/AREG/SULF2/PTPRM/IHH/NME1/DUSP10/FGF9/ALDH1A2/RUNX3/NR4A3/APLN/LAMB1/BMP5/MCC/FUT1/ESRP2/PIK3CD/FGF2/LRG1/NLRC3/NRARP/ITGA4/TNF/FBXW7/C5AR1/ECM1/WNT5A/ZFP36/TNFAIP3/STAT5A/CAV2/TLR4/HYAL1/XDH/MST1/CCR3/SFRP2/WNT2/ERRFI1/CXCL12/SNAI2/OSR1 89

BP GO:0019395 fatty acid oxidation 37/2416 105/18862 3.19752662111705e-09 1.23763902656812e-07 8.62325319641685e-08 ACOX1/AMACR/PHYH/ACADS/CPT1A/ACOX2/ETFDH/ACOT8/ABCB11/CPT2/PPARGC1A/CROT/IRS1/ACAT1/PPARG/ACAA1/TWIST1/ACAA2/BDH2/FABP3/CRAT/MLYCD/PECR/EHHADH/DECR2/HADH/APPL2/ECH1/PDK4/AUH/ACADM/HADHA/ABCD3/NR4A3/FABP1/SLC27A2/ETFA 37

BP GO:0002287 alpha-beta T cell activation involved in immune response 28/2416 67/18862 3.26022361025494e-09 1.23763902656812e-07 8.62325319641685e-08 HLA-DRB1/ANXA1/EOMES/ZC3H12A/GPR183/NFKBIZ/MIR21/SEMA4A/SLAMF6/HLA-DRA/CD86/IL18R1/IL12RB1/CD80/RIPK2/LEF1/STAT3/MALT1/CCL19/IL23A/IRF4/BCL6/BATF/TMEM98/SMAD7/LY9/IL6/IFNG 28

BP GO:0002293 alpha-beta T cell differentiation involved in immune response 28/2416 67/18862 3.26022361025494e-09 1.23763902656812e-07 8.62325319641685e-08 HLA-DRB1/ANXA1/EOMES/ZC3H12A/GPR183/NFKBIZ/MIR21/SEMA4A/SLAMF6/HLA-DRA/CD86/IL18R1/IL12RB1/CD80/RIPK2/LEF1/STAT3/MALT1/CCL19/IL23A/IRF4/BCL6/BATF/TMEM98/SMAD7/LY9/IL6/IFNG 28

BP GO:0046637 regulation of alpha-beta T cell differentiation 28/2416 67/18862 3.26022361025494e-09 1.23763902656812e-07 8.62325319641685e-08 HLA-DRB1/ANXA1/ZC3H12A/NFKBIZ/MIR21/SOCS1/SASH3/HLA-DRA/CD86/PRDM1/IL12RB1/CD80/RIPK2/ADA/CD83/MALT1/IHH/NCKAP1L/CCL19/RUNX3/LILRB4/IL23A/IRF4/BCL6/PNP/SMAD7/SH3RF1/IFNG 28

BP GO:2000514 regulation of CD4-positive, alpha-beta T cell activation 28/2416 67/18862 3.26022361025494e-09 1.23763902656812e-07 8.62325319641685e-08 CD55/HLA-DRB1/ANXA1/TWSG1/ZC3H12A/NFKBIZ/MIR21/SOCS1/CD274/SASH3/HLA-DRA/CD86/IL12RB1/CD80/RIPK2/CD83/MALT1/NCKAP1L/CCL19/RUNX3/IL23A/CD160/IRF4/BCL6/PRKCQ/SMAD7/SH3RF1/IFNG 28

BP GO:0032652 regulation of interleukin-1 production 40/2416 119/18862 3.63388871862621e-09 1.37075802297546e-07 9.55076015654924e-08 IFI16/CASP1/ANXA1/ZC3H12A/CX3CL1/NOD2/NR1H4/AIM2/SIRPA/MNDA/PYHIN1/FZD5/JAK2/RIPK2/STAT3/EGR1/MALT1/CCL19/CCR7/LILRB4/TYROBP/LPL/NLRP7/PANX1/CARD8/NLRP1/S1PR3/LILRA2/TLR8/SPHK1/TNF/WNT5A/IL6/IGHD/TNFAIP3/IFNG/TLR4/CD33/IL1R2/ERRFI1 40

BP GO:0032635 interleukin-6 production 49/2416 162/18862 3.88003330340072e-09 1.4544024206458e-07 1.01335527189115e-07 IRAK3/IL1B/SPHK2/LILRB2/ZC3H12A/CX3CL1/NOD2/NR1H4/XBP1/PTAFR/TWIST1/SIRPA/IL33/AFAP1L2/SYT11/CD74/CEBPB/MAPKAPK2/NOS2/RIPK2/STAT3/SLAMF1/HYAL2/HGF/NCKAP1L/BANK1/POU2AF1/TLR2/AIF1/IL27RA/LILRB4/TLR1/CD36/MAVS/IL1A/TYROBP/LPL/LILRA2/NLRC3/TLR8/TNF/PTPN6/WNT5A/IL6/F2RL1/TNFAIP3/IFNG/ADCYAP1/TLR4 49

BP GO:0009062 fatty acid catabolic process 37/2416 106/18862 4.31078903323512e-09 1.60576891488008e-07 1.11881991684951e-07 ACOX1/AMACR/PHYH/ACADS/CPT1A/ACOX2/ETFDH/ACOT8/ABCB11/LPIN1/PCK2/CPT2/CROT/IRS1/ACAT1/ACAA1/PCK1/TWIST1/ACAA2/BDH2/CRAT/MLYCD/PECR/EHHADH/DECR2/HADH/ECH1/AUH/ACADM/FAAH/HADHA/ABCD3/ABHD3/SLC27A4/FABP1/SLC27A2/ETFA 37

BP GO:0032731 positive regulation of interleukin-1 beta production 25/2416 56/18862 4.35775786846181e-09 1.61318241590263e-07 1.12398527565099e-07 IFI16/CASP1/NOD2/AIM2/MNDA/PYHIN1/FZD5/JAK2/RIPK2/STAT3/EGR1/MALT1/CCL19/TYROBP/LPL/PANX1/CARD8/NLRP1/LILRA2/TLR8/TNF/WNT5A/IL6/IFNG/TLR4 25

BP GO:0050921 positive regulation of chemotaxis 44/2416 139/18862 5.10423015838102e-09 1.87785257678709e-07 1.30839428036473e-07 SEMA5A/EDN2/STX3/VEGFC/RAC2/PDGFRB/F3/CD74/CXCL10/CXCL13/EDN1/CCR6/GPSM3/EDN3/CCL4/CALR/RARRES2/KDR/PLA2G7/DAPK2/CXCR4/CCL21/NCKAP1L/CXCL17/CCL19/CCR7/AIF1/S1PR1/CSF1R/IL23A/FGF2/CCR1/C3AR1/SWAP70/P2RX4/C5AR1/ITGA2/WNT5A/IL6/SERPINE1/S100A7/F2RL1/FPR2/CXCL12 44

BP GO:0051480 regulation of cytosolic calcium ion concentration 83/2416 344/18862 5.46624972313565e-09 1.99870235275389e-07 1.39259639378561e-07 CD55/CXCL9/THY1/TGM2/EDN2/LYN/SRI/GNA15/PLCE1/ADM/CX3CL1/TMEM38B/FPR1/FYN/GJA1/UBASH3B/F2RL2/PTPRC/PTGDR/PROK2/APLNR/CXCL10/CXCL11/RAMP3/CXCL13/CD38/EDN1/P2RY1/CCR6/CORO1A/JAK2/TRPV1/CLIC2/P2RY8/CAV1/EDNRA/CXCR2/ITPR1/GPR65/P2RX5/CXCR4/LCK/CCL21/CCL19/CCR7/CXCR6/S1PR1/GOT1/TMEM38A/CIB2/CD36/GPR4/CD52/PLCG2/CD19/MS4A1/S1PR3/FGF2/CCR1/C3AR1/SWAP70/MCOLN2/CYSLTR1/ITGAV/P2RX4/CXCR1/FAM155A/TRPM4/C5AR1/PTPN6/PTGFR/WNT5A/PKD2/F2RL1/GPR18/CCR5/CAV2/ADCYAP1/DHRS7C/GPR35/CCR3/FPR2/NMU 83

BP GO:0031341 regulation of cell killing 35/2416 98/18862 5.64161371331643e-09 2.05024498361987e-07 1.42850873549636e-07 CD55/HLA-DRB1/SERPINB9/CXCL6/ICAM1/LILRB1/PTPRC/CADM1/MR1/IL7R/SLAMF6/HLA-DRA/VAV1/IL12RB1/NOS2/SH2D1A/RASGRP1/FCGR2B/CD1C/IL23A/CD160/TYROBP/CRTAM/PRF1/CD1D/LAG3/CD1A/F2RL1/IL18RAP/AZGP1/IFNG/CD1B/KRT6A/STAP1/HSP90AB1 35

BP GO:0022408 negative regulation of cell-cell adhesion 54/2416 189/18862 6.06167091696978e-09 2.17635895573132e-07 1.51637867897564e-07 B4GALNT2/IDO1/HLA-DRB1/ANXA1/TWSG1/EPB41L5/LILRB2/ZC3H12A/LAX1/LILRB1/MIR21/LAPTM5/IRF1/SOCS1/CD274/UBASH3B/CTLA4/CD74/CD86/FXYD5/TIGIT/PAG1/IL2RA/CEBPB/IL1RN/JAK2/BTN2A2/ASS1/CR1/CD80/PODXL/TNFAIP8L2/PLA2G2D/IHH/CCL21/FCGR2B/MAD2L2/LRRC32/RUNX3/LILRB4/CRTAM/BCL6/CD300A/SWAP70/SMAD7/NRARP/MYADM/PTPN6/LAG3/KLF4/SH2B3/PRKAR1A/DTX1/CXCL12 54

BP GO:0060759 regulation of response to cytokine stimulus 54/2416 189/18862 6.06167091696978e-09 2.17635895573132e-07 1.51637867897564e-07 IRAK3/MMP12/CASP1/CASP4/PARP9/HIF1A/ZBP1/BIRC3/PADI2/STAT1/PPARG/NR1H4/ROBO1/SOCS3/MIR21/LAPTM5/SOCS1/PTPRC/CD74/IFNAR2/EDN1/IL1RN/JAK2/RIPK2/CCDC3/CAV1/PXDN/CXCR4/TLR2/SPATA2/IL1R1/MAVS/CARD8/CD300LF/TRAF1/NLRC5/PARP14/SPHK1/TNF/ECM1/PTPN6/WNT5A/IFNGR1/IL6/F2RL1/TNFAIP3/USP18/KLF4/IFNG/TLR4/SH2B3/IL1R2/STAP1/HSP90AB1 54

BP GO:0032651 regulation of interleukin-1 beta production 36/2416 103/18862 6.67731478502164e-09 2.38304168375623e-07 1.66038492448222e-07 IFI16/CASP1/ZC3H12A/CX3CL1/NOD2/AIM2/SIRPA/MNDA/PYHIN1/FZD5/JAK2/RIPK2/STAT3/EGR1/MALT1/CCL19/CCR7/LILRB4/TYROBP/LPL/NLRP7/PANX1/CARD8/NLRP1/S1PR3/LILRA2/TLR8/SPHK1/TNF/WNT5A/IL6/TNFAIP3/IFNG/TLR4/CD33/ERRFI1 36

BP GO:0070372 regulation of ERK1 and ERK2 cascade 75/2416 301/18862 6.7838069217363e-09 2.40663626509216e-07 1.6768244552788e-07 GCNT2/RPS6KA6/CHI3L1/FGFR2/PLA2G2A/DUSP4/CNKSR3/LYN/PDE8A/CCL11/HLA-DRB1/IL1B/FERMT2/GBP1/FGFR3/GPR183/MT3/CX3CL1/ICAM1/NOD2/CD44/CCL2/SLC30A10/MIR21/SIRPA/PTPRC/SLC9A3R1/CAMK2N1/CFLAR/CCL18/PDGFRB/CD74/IL26/NQO2/TEK/RAMP3/CCL20/P2RY1/CCL22/TIMP3/CCL4/RIPK2/RASGRP1/SEMA6A/SLAMF1/KDR/CCL21/PTPRR/DUSP10/GNAI2/CCL19/CCR7/EPHA2/MIF/CSF1R/CD36/CCL13/FGF2/CCR1/TNFSF11/NDRG2/TNF/FBXW7/C5AR1/TBC1D10C/PTPN6/LIF/FN1/S100A7/F2RL1/KLF4/ADCYAP1/TLR4/ERRFI1/FPR2 75

BP GO:0050777 negative regulation of immune response 46/2416 150/18862 7.11820422513528e-09 2.51032527702996e-07 1.74906980181617e-07 IRAK3/CD55/IFI16/MMP12/C4BPB/LYN/SERPING1/HLA-DRB1/ANXA1/ZC3H12A/SERPINB9/PPARG/NOD2/LILRB1/MIR21/PTPRC/IL33/CTLA4/IL7R/COL3A1/SLAMF8/IL2RA/IL13RA2/CR1/C4BPA/SAMSN1/NMI/SPINK5/FCGR2B/DUSP10/IL27RA/LILRB4/CD160/BCL6/CD300A/NLRC5/NLRC3/TRAFD1/PARP14/SMAD7/ENPP3/PTPN6/TNFAIP3/ADCYAP1/FCRLB/FOXF1 46

BP GO:0032729 positive regulation of interferon-gamma production 27/2416 65/18862 7.27218828804008e-09 2.54790480306194e-07 1.77525334653468e-07 IL1B/SLC7A5/SLAMF6/SASH3/IL18R1/PDE4B/CD2/FZD5/IL12RB1/RIPK2/RASGRP1/IL27RA/IL1R1/IL23A/CD160/HLA-DPA1/LTA/CRTAM/TLR8/HLA-DPB1/CD14/TNF/EBI3/WNT5A/CD3E/IRF8/TLR4 27

BP GO:0019932 second-messenger-mediated signaling 76/2416 307/18862 7.31026378059718e-09 2.54790480306194e-07 1.77525334653468e-07 VCAM1/PDK2/EIF4EBP2/DEFB1/EDN2/RGS2/SELP/PDZD3/PLCE1/GBP1/SCTR/DDAH2/TMEM38B/FPR1/CHP2/PTPRC/GUCA2B/APLNR/HPCA/GPR143/CCL20/ERBB3/NR5A2/EDN1/CCR6/DGKQ/EDN3/CCL4/CRTC3/AGT/NOS2/BTK/CLIC2/PLEK/ADA/CXCR2/ITPR1/KDR/P2RX5/CXCR4/DYRK2/LMCD1/RNF157/CCR7/CXCR6/TMEM38A/LRRK2/PPP3CC/CD36/PCLO/PLCG2/CCR1/TNFSF11/RAPGEF4/P2RX4/SPHK1/CXCR1/NFATC1/TNF/TRPM4/TBC1D10C/PTGFR/CD3E/CD22/PRKAR2B/SELE/TRAT1/AQP1/CCR5/ADCYAP1/PDE9A/MCTP1/PRKAR1A/CCR3/FPR2/AHR 76

BP GO:0001667 ameboidal-type cell migration 105/2416 473/18862 7.47671811424979e-09 2.59076976517028e-07 1.80511952023962e-07 TIMP1/S100P/SEMA5A/PITX2/MMP9/PBLD/HIF1A/GLUL/PIK3R3/GREM1/ANXA1/EPB41L5/CTSH/ZC3H12A/CD40/EPB41L4B/PPARG/ADAMTS9/CENPV/ARHGDIB/ITGB2/ROBO1/GJA1/VEGFC/EFNA1/MIR21/TWIST1/TACSTD2/ANGPT2/SPARC/VIL1/SEMA4A/FSTL1/ACVR1C/RHOJ/PLK2/MARVELD3/TEK/CDH5/CXCL13/EDN1/MMRN2/CCR6/AMOTL2/EGR3/EDN3/APOH/CALR/OVOL2/APPL2/AGT/FAP/SERPINF1/SEMA6A/RAB13/STC1/PLXND1/SEMA4D/PRR5L/HYAL2/BMP7/KDR/S100A2/SEMA3E/ETS1/DDR2/PTPRM/MEOX2/MAP4K4/ZEB2/PTPRR/PTP4A3/DUSP10/ANXA3/EPHA2/CLEC14A/ENPP2/DCN/SOX17/MCC/FUT1/PTGS2/PLCG2/PIK3CD/PKN1/FGF2/RCC2/P2RX4/ITGA4/TNF/FBXW7/EVL/SEMA6D/ITGA2/WNT5A/FN1/ADAM9/STAT5A/KLF4/SH3BP1/IFNG/PRSS3/PFN2/HYAL1/LAMA5 105

BP GO:0045766 positive regulation of angiogenesis 51/2416 175/18862 7.65473889767735e-09 2.6087158732723e-07 1.81762347581406e-07 SEMA5A/CHI3L1/ITGA5/HIF1A/CCL11/IL1B/GREM1/C3/RAMP2/CTSH/ZC3H12A/CD40/ADM/ITGB2/ITGAX/XBP1/VEGFC/MIR21/TWIST1/ANGPT2/GAB1/F3/CD34/APLNR/TEK/CDH5/TIE1/KDR/ETS1/CXCR4/HGF/ANXA3/GATA6/IL1A/FUT1/PIK3CD/FGF2/C3AR1/LRG1/ENG/SPHK1/C5AR1/ECM1/WNT5A/ADAM12/SERPINE1/AQP1/KLF4/HYAL1/CCR3/SFRP2 51

BP GO:1904018 positive regulation of vasculature development 51/2416 175/18862 7.65473889767735e-09 2.6087158732723e-07 1.81762347581406e-07 SEMA5A/CHI3L1/ITGA5/HIF1A/CCL11/IL1B/GREM1/C3/RAMP2/CTSH/ZC3H12A/CD40/ADM/ITGB2/ITGAX/XBP1/VEGFC/MIR21/TWIST1/ANGPT2/GAB1/F3/CD34/APLNR/TEK/CDH5/TIE1/KDR/ETS1/CXCR4/HGF/ANXA3/GATA6/IL1A/FUT1/PIK3CD/FGF2/C3AR1/LRG1/ENG/SPHK1/C5AR1/ECM1/WNT5A/ADAM12/SERPINE1/AQP1/KLF4/HYAL1/CCR3/SFRP2 51

BP GO:0002824 positive regulation of adaptive immune response based on somatic recombination of immune receptors built from immunoglobulin superfamily domains 35/2416 99/18862 7.65982009769552e-09 2.6087158732723e-07 1.81762347581406e-07 HLA-DRB1/IL1B/C3/CD40/NFKBIZ/NOD2/MIR21/CD274/PTPRC/TNFSF13B/MR1/SASH3/HLA-DRA/IL18R1/FZD5/IL12RB1/RIPK2/BTK/ADA/CLCF1/MALT1/MAD2L2/CD1C/IL27RA/IL1R1/IL23A/TNFSF13/LTA/PRKCQ/TNF/CD1D/IL6/CD1A/AZGP1/CD1B 35

BP GO:2000516 positive regulation of CD4-positive, alpha-beta T cell activation 20/2416 39/18862 7.87723593706564e-09 2.66751853323359e-07 1.85859424472033e-07 CD55/HLA-DRB1/ANXA1/NFKBIZ/MIR21/SOCS1/SASH3/HLA-DRA/CD86/IL12RB1/CD80/RIPK2/CD83/MALT1/NCKAP1L/CCL19/IL23A/CD160/PRKCQ/IFNG 20

BP GO:0001909 leukocyte mediated cytotoxicity 38/2416 113/18862 8.74296060374567e-09 2.94118675910089e-07 2.04927265359467e-07 HLA-DRB1/CTSH/SERPINB9/CXCL6/CTSC/ICAM1/LILRB1/GZMB/PTPRC/CADM1/MR1/IL7R/SLAMF6/HLA-DRA/VAV1/CORO1A/IL12RB1/NOS2/SH2D1A/RASGRP1/TUBB/FCGR2B/CD1C/SLAMF7/IL23A/CD160/TYROBP/CRTAM/PTPN6/PRF1/CD1D/LAG3/CD1A/F2RL1/IL18RAP/AZGP1/CD1B/STAP1 38

BP GO:0061448 connective tissue development 64/2416 243/18862 8.78408126040198e-09 2.94118675910089e-07 2.04927265359467e-07 TIMP1/CHI3L1/BMP3/PRRX1/LUM/HIF1A/TNMD/GREM1/CREB3L2/HOXA3/SULF1/PPARGC1A/FGFR3/TGFBI/HOXA5/BGN/CD44/NR1H4/XBP1/CHST11/MIR21/CFLAR/PDGFRB/CD34/KLF7/SCIN/EDN1/HES5/MGP/CHRDL2/TRPS1/STC1/SH3PXD2B/HYAL2/BMP7/SATB2/EGR1/SULF2/IHH/COL1A1/SLC25A25/CHSY1/RUNX3/EFEMP1/CSGALNACT1/BMP5/GPR4/SERPINB7/FGF2/PKDCC/SERPINH1/COL5A1/SMAD7/GLG1/TRPM4/ECM1/WNT5A/ADAMTS12/HYAL1/FRZB/SFRP2/SNAI2/PTHLH/OSR1 64

BP GO:0014066 regulation of phosphatidylinositol 3-kinase signaling 41/2416 127/18862 8.8935467534913e-09 2.95139090112908e-07 2.05638239225613e-07 LYN/FGR/ENTPD5/UNC5B/HCLS1/SELP/FYN/MIR21/TWIST1/INSR/SLC9A3R1/GAB1/PDGFRB/TEK/ERBB3/PPP1R16B/JAK2/AGT/SEMA4D/PRR5L/FBXL2/KDR/PIK3R5/HGF/PIK3AP1/DCN/HCST/PIK3CD/IER3/FGF2/PIP5K1B/NLRC3/CEP55/TNF/PTPN6/FN1/CAT/F2RL1/KLF4/OSM/CSF3 41

BP GO:0002456 T cell mediated immunity 36/2416 104/18862 8.9631166628249e-09 2.95139090112908e-07 2.05638239225613e-07 CD55/BTN3A3/HLA-DRB1/IL1B/CTSH/CTSC/ICAM1/NOD2/LILRB1/PTPRC/MR1/IL7R/SASH3/HLA-DRA/TNFRSF1B/IL18R1/RFTN1/FZD5/IL12RB1/BTN3A2/MALT1/FCGR2B/CD1C/IL1R1/LILRB4/WAS/IL23A/SMAD7/TRPM4/PRF1/CD8A/CD1D/IL6/CD1A/AZGP1/CD1B 36

BP GO:0002821 positive regulation of adaptive immune response 36/2416 104/18862 8.9631166628249e-09 2.95139090112908e-07 2.05638239225613e-07 HLA-DRB1/IL1B/C3/CD40/NFKBIZ/NOD2/MIR21/CD274/PTPRC/TNFSF13B/MR1/SASH3/HLA-DRA/IL18R1/FZD5/IL12RB1/RIPK2/BTK/ADA/CLCF1/MALT1/MAD2L2/CD1C/IL27RA/IL1R1/IL23A/TNFSF13/LTA/PRKCQ/TNF/CD1D/SKAP1/IL6/CD1A/AZGP1/CD1B 36

BP GO:0070486 leukocyte aggregation 11/2416 13/18862 9.07997138495367e-09 2.973441178809e-07 2.07174592907127e-07 S100A8/MSN/IL1B/S100A9/CD44/RAC2/SEMA4D/BMP7/STK10/NR4A3/JAM2 11

BP GO:0031589 cell-substrate adhesion 85/2416 359/18862 9.2417517677137e-09 2.99352394215074e-07 2.08573859975003e-07 GCNT2/VCAM1/MMP12/PDPN/ITGA5/THY1/OLFM4/GREM1/LAMC1/FERMT2/EPB41L5/GBP1/CX3CL1/ADAMTS9/EFNA5/ITGB2/CD44/EFNA1/TACSTD2/ANGPT2/RAC2/HOXA7/PLAU/CD34/SORBS3/TEK/COL3A1/ZYX/SNED1/CORO1A/JAK2/CEACAM6/CALR/PARVG/EGFL6/CCDC80/ITGAL/EFEMP2/KDR/SEMA3E/MADCAM1/P4HB/VWF/CCL21/MAP4K4/COL1A1/NID1/CCR7/LGALS1/PARVB/PREX1/SPOCK2/EGFLAM/LAMB1/CD36/FBLN5/FUT1/DUSP22/TESK2/BCL6/MMP14/COL5A3/RCC2/ITGAV/ITGA4/SGCE/MYADM/FLNA/ITGA2/CD3E/FERMT3/LAMB2/ADAMTS12/SKAP1/FN1/SERPINE1/DDR1/ADAM9/NTNG2/NTN4/APOD/NID2/FOXF1/LYVE1/LAMA5 85

BP GO:0042493 response to drug 85/2416 359/18862 9.2417517677137e-09 2.99352394215074e-07 2.08573859975003e-07 CDH3/ABCB1/CYP2B6/LRP8/HSPA5/NNMT/PTGR1/CPT1A/LYN/ABCB11/IL1B/ANXA1/PPARGC1A/PPARG/ICAM1/FYN/VEGFC/OTC/AIM2/TDO2/PAM/FABP3/KCNE2/VAV3/ALAD/PDE4B/DDC/SLAMF8/CD38/NAT8/EDN1/ASS1/CALR/CCNO/NOS2/SORD/SLC10A1/ADA/NR1I2/ABCC1/FOSL1/CXCR4/LCK/PTPRM/COL1A1/SOD2/NCKAP1L/NME1/LGALS1/GATA6/CYP3A4/CYP2J2/ABCD3/HNF1B/COL18A1/LPL/LTA/ABCC3/PNP/SRD5A1/BCAR3/ENG/HSD11B2/FOS/TIMP2/ITGA2/PRKAR2B/INHBA/CAT/SLC1A1/CYP2S1/ACSL1/BCHE/APOD/MGST1/GGH/FOSB/TNFRSF11B/HSP90AB1/SFRP2/SCNN1B/MAP2K6/CYP2C9/ABCG5/CPS1 85

BP GO:0045088 regulation of innate immune response 77/2416 315/18862 1.0573389145724e-08 3.40634590856838e-07 2.37337241421799e-07 IRAK3/IFI16/MMP12/LRP8/RNF135/PSMB9/PARP9/LYN/FGR/ZBP1/SERPING1/BIRC3/SERPINB9/STAT1/ICAM2/PPARG/NOD2/LILRB1/FYN/SOCS3/MIR21/AIM2/IRF1/SOCS1/GBP5/MUC1/CADM1/SLAMF6/IFNAR2/MNDA/VAV1/SLAMF8/PYHIN1/CLEC4E/JAK2/CR1/APPL2/SH2D1A/RASGRP1/FCN1/FCER1G/MALT1/NMI/PSMB8/FCGR2B/DUSP10/CLEC4A/MAVS/CD160/TYROBP/HCK/PLCG2/LILRA2/CRTAM/PRKACB/NLRC5/NLRC3/TRAFD1/PARP14/TLR8/PTPN6/WNT5A/CD1D/IFI35/LAG3/IFNGR1/MUC20/IL18RAP/TNFAIP3/USP18/IFNG/CLEC4D/TLR4/PSMA8/HSP90AB1/FPR2/MUCL1 77

BP GO:0002294 CD4-positive, alpha-beta T cell differentiation involved in immune response 27/2416 66/18862 1.08108503285679e-08 3.46412193324003e-07 2.41362787471422e-07 HLA-DRB1/ANXA1/ZC3H12A/GPR183/NFKBIZ/MIR21/SEMA4A/SLAMF6/HLA-DRA/CD86/IL18R1/IL12RB1/CD80/RIPK2/LEF1/STAT3/MALT1/CCL19/IL23A/IRF4/BCL6/BATF/TMEM98/SMAD7/LY9/IL6/IFNG 27

BP GO:0001959 regulation of cytokine-mediated signaling pathway 51/2416 177/18862 1.16467673349779e-08 3.71201782441008e-07 2.58634940256054e-07 IRAK3/MMP12/CASP1/CASP4/PARP9/HIF1A/ZBP1/BIRC3/PADI2/STAT1/PPARG/NR1H4/ROBO1/SOCS3/MIR21/LAPTM5/SOCS1/PTPRC/CD74/IFNAR2/EDN1/IL1RN/JAK2/RIPK2/CCDC3/CAV1/PXDN/CXCR4/SPATA2/IL1R1/MAVS/CARD8/CD300LF/TRAF1/NLRC5/PARP14/SPHK1/TNF/ECM1/PTPN6/WNT5A/IFNGR1/IL6/F2RL1/TNFAIP3/USP18/IFNG/SH2B3/IL1R2/STAP1/HSP90AB1 51

BP GO:0042100 B cell proliferation 34/2416 96/18862 1.18557801133847e-08 3.75853454658366e-07 2.61875994105838e-07 LYN/CD40/GPR183/PTPRC/TNFSF13B/CTLA4/CD79A/IL7R/VAV3/CD74/SASH3/MNDA/CD38/LEF1/RASGRP1/BTK/ADA/CD180/CLCF1/FCGR2B/NCKAP1L/FCRL3/MIF/TYROBP/CD19/PKN1/MS4A1/BCL6/CD300A/CD22/CR2/TLR4/GAPT/AHR 34

BP GO:0001503 ossification 92/2416 401/18862 1.19739616429566e-08 3.77591594666778e-07 2.63087043617174e-07 ANKH/ENPP1/BMP3/FGFR2/HOXA2/MMP9/HIF1A/SLC26A2/FGR/IFITM1/SNX10/GREM1/TWSG1/FERMT2/COL1A2/FGFR3/ACVR2A/COL5A2/TPM4/RRAS2/TMEM38B/PPARG/GDPD2/VEGFC/MIR21/TWIST1/SPARC/CDH11/TNC/TEK/IGFBP5/PBX1/JUNB/TP53INP2/CEBPB/MGP/CTHRC1/SLC24A3/CHRDL2/CEBPA/LEF1/STC1/SEMA4D/BMP7/SATB2/DDR2/IHH/COL1A1/WWTR1/HGF/CLEC5A/S1PR1/CHSY1/EPHA2/LTF/RUNX3/RASSF2/CSGALNACT1/VCAN/BMP5/EGR2/SRGN/CYP27B1/PKDCC/CCR1/TNFSF11/TUFT1/MMP14/SPP1/SMAD7/ISG15/DDX21/TNF/TRPM4/ECM1/WNT5A/DCHS1/IL6/CAT/ACP5/LRP4/MINPP1/BAMBI/TCIRG1/TMEM119/SFRP2/SNAI2/PTHLH/TPH1/DKK1/TOB1/OSR1 92

BP GO:0050868 negative regulation of T cell activation 39/2416 119/18862 1.26925350394039e-08 3.98144783341301e-07 2.77407483271182e-07 IDO1/HLA-DRB1/ANXA1/TWSG1/LILRB2/ZC3H12A/LAX1/LILRB1/MIR21/LAPTM5/IRF1/SOCS1/CD274/CTLA4/CD74/CD86/TIGIT/PAG1/IL2RA/CEBPB/BTN2A2/CR1/CD80/TNFAIP8L2/PLA2G2D/IHH/FCGR2B/LRRC32/RUNX3/LILRB4/CRTAM/BCL6/CD300A/SMAD7/NRARP/PTPN6/LAG3/PRKAR1A/DTX1 39

BP GO:1903038 negative regulation of leukocyte cell-cell adhesion 43/2416 138/18862 1.28742442948569e-08 4.0173034553585e-07 2.79905724680136e-07 IDO1/HLA-DRB1/ANXA1/TWSG1/LILRB2/ZC3H12A/LAX1/LILRB1/MIR21/LAPTM5/IRF1/SOCS1/CD274/CTLA4/CD74/CD86/TIGIT/PAG1/IL2RA/CEBPB/BTN2A2/ASS1/CR1/CD80/TNFAIP8L2/PLA2G2D/IHH/CCL21/FCGR2B/LRRC32/RUNX3/LILRB4/CRTAM/BCL6/CD300A/SMAD7/NRARP/PTPN6/LAG3/KLF4/PRKAR1A/DTX1/CXCL12 43

BP GO:0001910 regulation of leukocyte mediated cytotoxicity 30/2416 79/18862 1.33462482677924e-08 4.1428978997939e-07 2.88656520923471e-07 HLA-DRB1/SERPINB9/CXCL6/ICAM1/LILRB1/PTPRC/CADM1/MR1/IL7R/SLAMF6/HLA-DRA/VAV1/IL12RB1/NOS2/SH2D1A/RASGRP1/FCGR2B/CD1C/IL23A/CD160/TYROBP/CRTAM/CD1D/LAG3/CD1A/F2RL1/IL18RAP/AZGP1/CD1B/STAP1 30

BP GO:0043370 regulation of CD4-positive, alpha-beta T cell differentiation 23/2416 51/18862 1.42354922404404e-08 4.39603801829145e-07 3.06294065386079e-07 HLA-DRB1/ANXA1/ZC3H12A/NFKBIZ/MIR21/SOCS1/SASH3/HLA-DRA/CD86/IL12RB1/CD80/RIPK2/CD83/MALT1/NCKAP1L/CCL19/RUNX3/IL23A/IRF4/BCL6/SMAD7/SH3RF1/IFNG 23

BP GO:0032675 regulation of interleukin-6 production 47/2416 158/18862 1.43866808985105e-08 4.39962305937306e-07 3.06543853218416e-07 IRAK3/IL1B/LILRB2/ZC3H12A/CX3CL1/NOD2/NR1H4/XBP1/PTAFR/TWIST1/SIRPA/IL33/AFAP1L2/SYT11/CD74/CEBPB/MAPKAPK2/RIPK2/STAT3/SLAMF1/HYAL2/HGF/NCKAP1L/BANK1/POU2AF1/TLR2/AIF1/IL27RA/LILRB4/TLR1/CD36/MAVS/IL1A/TYROBP/LPL/LILRA2/NLRC3/TLR8/TNF/PTPN6/WNT5A/IL6/F2RL1/TNFAIP3/IFNG/ADCYAP1/TLR4 47

BP GO:0006635 fatty acid beta-oxidation 29/2416 75/18862 1.43947398754656e-08 4.39962305937306e-07 3.06543853218416e-07 ACOX1/AMACR/ACADS/CPT1A/ACOX2/ETFDH/ACOT8/ABCB11/CPT2/CROT/IRS1/ACAT1/ACAA1/TWIST1/ACAA2/BDH2/CRAT/MLYCD/EHHADH/DECR2/HADH/ECH1/AUH/ACADM/HADHA/ABCD3/FABP1/SLC27A2/ETFA 29

BP GO:0070664 negative regulation of leukocyte proliferation 32/2416 88/18862 1.52073190361427e-08 4.62426640078624e-07 3.22195883982722e-07 LYN/IDO1/HLA-DRB1/GREM1/TWSG1/LILRB2/LILRB1/CD274/LST1/IL33/CTLA4/MNDA/CD86/IL2RA/CEBPB/BTN2A2/CR1/CD80/BTK/PLA2G2D/IHH/FCGR2B/LRRC32/LILRB4/TYROBP/PKN1/CRTAM/CD300A/ENPP3/PTPN6/TNFAIP3/PRKAR1A 32

BP GO:0002573 myeloid leukocyte differentiation 56/2416 204/18862 1.53498099618899e-08 4.64206680967038e-07 3.234361279433e-07 IFI16/MMP9/LYN/SNX10/HLA-DRB1/HCLS1/PIAS3/GPR183/PPARG/LILRB1/UBASH3B/HOXA7/MT1G/LILRB3/FBN1/CD74/PF4/JUNB/CEBPB/BATF3/CEBPA/LEF1/GPR137B/EVI2B/NME1/TLR2/CCL19/CCR7/EPHA2/LTF/SPI1/LILRB4/RASSF2/CSF1R/IL23A/TYROBP/CA2/IRF4/PIK3CD/CCR1/TNFSF11/BATF2/BATF/MAFB/TNF/FBXW7/FOS/OSCAR/LIF/INHBA/F2RL1/IFNG/TLR4/TSPAN2/TCIRG1/CSF3 56

BP GO:0001912 positive regulation of leukocyte mediated cytotoxicity 24/2416 55/18862 1.54216313475627e-08 4.64206680967038e-07 3.234361279433e-07 HLA-DRB1/PTPRC/CADM1/MR1/SLAMF6/HLA-DRA/VAV1/IL12RB1/NOS2/SH2D1A/RASGRP1/CD1C/IL23A/CD160/TYROBP/CRTAM/CD1D/LAG3/CD1A/F2RL1/IL18RAP/AZGP1/CD1B/STAP1 24

BP GO:0031343 positive regulation of cell killing 26/2416 63/18862 1.61988672263908e-08 4.85152003363263e-07 3.38029786871789e-07 HLA-DRB1/PTPRC/CADM1/MR1/SLAMF6/HLA-DRA/VAV1/IL12RB1/NOS2/SH2D1A/RASGRP1/CD1C/IL23A/CD160/TYROBP/CRTAM/PRF1/CD1D/LAG3/CD1A/F2RL1/IL18RAP/AZGP1/IFNG/CD1B/STAP1 26

BP GO:0014065 phosphatidylinositol 3-kinase signaling 46/2416 154/18862 1.77235339486244e-08 5.28161311669008e-07 3.67996533828018e-07 LYN/FGR/ENTPD5/UNC5B/HCLS1/SELP/LTK/IRS1/FYN/MIR21/TWIST1/INSR/SLC9A3R1/GAB1/PDGFRB/TEK/ERBB3/PPP1R16B/EDN1/JAK2/AGT/SEMA4D/PRR5L/FBXL2/KDR/PIK3R5/HGF/PEAR1/PIK3AP1/DCN/CD160/HCST/PIK3CD/IER3/FGF2/PIP5K1B/NLRC3/CEP55/TNF/PTPN6/FN1/CAT/F2RL1/KLF4/OSM/CSF3 46

BP GO:0002367 cytokine production involved in immune response 33/2416 93/18862 1.83506373418832e-08 5.44128351032955e-07 3.79121572734901e-07 IRAK3/CD55/IL1B/SLC7A5/SPHK2/NOD2/LILRB1/LAPTM5/CD74/SASH3/TNFRSF1B/IL18R1/FZD5/BTK/MALT1/IL1R1/LILRB4/NR4A3/CD36/MAVS/CD160/BCL6/BST2/SMAD7/DDX21/TNF/TRPM4/WNT5A/IL6/F2RL1/TRIL/TLR4/CHGA 33

BP GO:0070371 ERK1 and ERK2 cascade 77/2416 320/18862 2.19061879968675e-08 6.42803716398026e-07 4.47873659694492e-07 GCNT2/RPS6KA6/CHI3L1/FGFR2/PLA2G2A/DUSP4/CNKSR3/LYN/PDE8A/CCL11/HLA-DRB1/IL1B/FERMT2/CTSH/GBP1/FGFR3/GPR183/MT3/CX3CL1/ICAM1/NOD2/CD44/CCL2/SLC30A10/MIR21/SIRPA/PTPRC/SLC9A3R1/CAMK2N1/CFLAR/CCL18/PDGFRB/CD74/IL26/NQO2/TEK/RAMP3/CCL20/P2RY1/CCL22/TIMP3/CCL4/RIPK2/RASGRP1/SEMA6A/SLAMF1/KDR/CCL21/PTPRR/DUSP10/GNAI2/CCL19/CCR7/EPHA2/MIF/CSF1R/CD36/CCL13/FGF2/CCR1/TNFSF11/ITGAV/NDRG2/TNF/FBXW7/C5AR1/TBC1D10C/PTPN6/LIF/FN1/S100A7/F2RL1/KLF4/ADCYAP1/TLR4/ERRFI1/FPR2 77

BP GO:0033627 cell adhesion mediated by integrin 28/2416 72/18862 2.19572546995287e-08 6.42803716398026e-07 4.47873659694492e-07 ITGA5/LYN/ICAM1/ITGB2/EFNA1/MUC1/PLAU/FBN1/IFT74/CXCL13/PODXL/ADA/CCL21/NCKAP1L/EPHA2/SWAP70/ITGAV/ITGA4/PTPN6/ITGA2/CD3E/FERMT3/SKAP1/LIF/SERPINE1/ADAM9/SFRP2/SNAI2 28

BP GO:0043434 response to peptide hormone 97/2416 435/18862 2.20020064002009e-08 6.42803716398026e-07 4.47873659694492e-07 TIMP1/ENPP1/PDK2/EIF4EBP2/LYN/RAB31/LPIN1/PIK3R3/PCK2/SLC25A33/IL1B/ANXA1/ADM/IRS1/STAT1/BSG/PPARG/ICAM1/NR1H4/XBP1/SLC30A10/PCK1/FYN/GJA1/SOCS3/OTC/SOCS1/SPARC/FABP3/INSR/FBN1/CFLAR/GAB1/ACVR1C/TEK/BTG2/OSBPL8/ADCY3/REG1A/IGFBP5/EDN1/JAK2/REG3A/ASS1/TFF1/APPL2/RARRES2/EEF2K/STAT3/AGTRAP/RAB13/CAV1/BMP7/UCP2/EGR1/PDK4/COL1A1/FOXO4/SCAP/RHOQ/GNAI2/TLR2/GOT1/REG1B/NR4A3/EGR2/STAT4/CYC1/CA2/LPL/HHEX/RAB8B/SLC27A4/PRKACB/GJB2/NR4A2/PRKCQ/SRD5A1/BCAR3/ADCY6/HSD11B2/GHR/GCNT1/PRKAR2B/GPT/ADCY4/CAT/STAT5A/ATP6V0D2/CAV2/GGH/PRKAR1A/GRB14/TCIRG1/ERRFI1/CXCL12/CPS1 97

BP GO:0032732 positive regulation of interleukin-1 production 26/2416 64/18862 2.39708235288275e-08 6.93524797241807e-07 4.8321358620963e-07 IFI16/CASP1/NOD2/AIM2/MNDA/PYHIN1/FZD5/JAK2/RIPK2/STAT3/EGR1/MALT1/CCL19/TYROBP/LPL/PANX1/CARD8/NLRP1/LILRA2/TLR8/TNF/WNT5A/IL6/IGHD/IFNG/TLR4 26

BP GO:0042093 T-helper cell differentiation 26/2416 64/18862 2.39708235288275e-08 6.93524797241807e-07 4.8321358620963e-07 HLA-DRB1/ANXA1/ZC3H12A/GPR183/NFKBIZ/MIR21/SEMA4A/SLAMF6/HLA-DRA/CD86/IL18R1/IL12RB1/CD80/RIPK2/LEF1/STAT3/MALT1/CCL19/IL23A/IRF4/BCL6/BATF/TMEM98/SMAD7/LY9/IL6 26

BP GO:0050764 regulation of phagocytosis 33/2416 94/18862 2.48262830770892e-08 7.14805058644693e-07 4.98040613979745e-07 C2/RAB31/FGR/IL1B/C3/DYSF/PPARG/NOD2/CCL2/IL15RA/SIRPA/PTPRC/SYT11/CALR/APPL2/FCER1G/FCGR2B/NCKAP1L/TLR2/CD36/HCK/CD300LF/CD300A/ITGAV/SPHK1/TNF/ITGA2/SIRPB1/IL2RB/F2RL1/IFNG/STAP1/FPR2 33

BP GO:0006790 sulfur compound metabolic process 87/2416 378/18862 2.54380794045453e-08 7.28898813707165e-07 5.07860441553296e-07 SLC19A3/ACSF2/ENPP1/PDK2/HMGCS2/CHST2/ACOT8/LUM/KYNU/CBS/SLC26A2/SUOX/CHST3/TSTD1/ACAT1/SULT1A2/BGN/CHST11/ACOT11/MIR21/TPK1/TDO2/PDHA1/ACOT4/AHCYL2/BPNT1/MLYCD/HMGCL/SLC7A11/SULT1A1/PPT1/CSGALNACT2/TST/NAT8/ACSS2/UGDH/MPST/CHST15/ACOT9/TPST2/SCD/ST3GAL1/SLC35D2/SUCLG2/CLIC2/OPLAH/CHAC1/PDK4/GSTM4/ACSL4/TPST1/GAL3ST4/PAPSS2/CHSY1/SPOCK2/EGFLAM/DCN/FMOD/PDP1/ETHE1/CSGALNACT1/VCAN/PAPSS1/FAR2/HPGDS/SLC25A10/HSD17B8/CTH/CHSY3/ACOT13/GGT5/GSTA1/SULT1B1/GHR/GGT6/ST3GAL4/PDK1/STAT5A/SLC1A1/ACSL1/GSTO2/ACSM3/MGST1/SULT1C2/HYAL1/CPS1/GSTT1 87

BP GO:0022617 extracellular matrix disassembly 30/2416 81/18862 2.61554397115821e-08 7.45868041536025e-07 5.19683755538612e-07 TIMP1/MMP3/MMP12/CTSK/MMP10/MMP1/PDPN/MMP9/LAMC1/BSG/MMP7/CD44/FSCN1/HTRA1/MMP19/FAP/LCP1/SH3PXD2B/ETS1/DDR2/ADAMTS5/MMP14/TIMP2/KLKB1/IL6/DDR1/PRSS1/TPSAB1/KLK7/MMP13 30

BP GO:0002708 positive regulation of lymphocyte mediated immunity 36/2416 108/18862 2.77096297925026e-08 7.86425683634835e-07 5.47942303415653e-07 HLA-DRB1/IL1B/C3/CD40/NOD2/PTPRC/CADM1/MR1/SLAMF6/SASH3/HLA-DRA/IL18R1/VAV1/FZD5/IL12RB1/SH2D1A/RASGRP1/BTK/CLCF1/MALT1/MAD2L2/CD1C/IL1R1/IL23A/CD160/TNFSF13/LTA/CRTAM/TNF/CD1D/LAG3/IL6/CD1A/IL18RAP/AZGP1/CD1B 36

BP GO:0022604 regulation of cell morphogenesis 74/2416 305/18862 2.84246613907797e-08 8.02895648763255e-07 5.59417755982169e-07 LRP8/RHOU/PDPN/MSN/ITPKA/FGR/CCL11/OLFM4/ANXA1/FERMT2/GBP1/EFNA5/ICAM1/ITGB2/CD44/CCL2/FYN/MIR21/TACSTD2/PLXNA2/SPARC/LST1/RAC2/VIL1/SEMA4A/SLC9A3R1/PALMD/RHOJ/REG1A/DNMBP/EPB41L3/P2RY1/SYT17/CORO1A/ARHGAP15/CALR/EEF2K/PLXND1/SEMA4D/RHOH/KDR/SEMA3E/FMNL1/FMNL3/CXCR4/P4HB/MYH10/PLEKHO1/RHOQ/RNF157/DBN1/NEDD4L/PARVB/PREX1/ENPP2/CSF1R/SHROOM3/HCK/CCL13/FGD3/FBLIM1/FGD5/RCC2/MYADM/FLNA/ERMN/WNT5A/CPNE5/FN1/NTNG2/RND1/BAMBI/RELN/CDC42EP5 74

BP GO:0042102 positive regulation of T cell proliferation 34/2416 99/18862 2.8800189805768e-08 8.0966571340744e-07 5.64134800316558e-07 CD55/VCAM1/IL1B/ANXA1/LILRB2/MIR21/CD274/PTPRC/TNFSF13B/SASH3/CD86/IL2RA/CORO1A/IL12RB1/HLA-DMB/CD80/RIPK2/HHLA2/NCKAP1L/CCL19/AIF1/IL27RA/TNFSF9/IL23A/IL1A/HLA-DPA1/PNP/PRKCQ/HLA-DPB1/EBI3/CD1D/CD3E/IL6/RASAL3 34

BP GO:2000377 regulation of reactive oxygen species metabolic process 53/2416 192/18862 3.01389050003612e-08 8.43323351183817e-07 5.87585768353966e-07 MMP3/DUOXA2/HIF1A/SLC25A33/IL1B/DUOXA1/SPHK2/ZC3H12A/MT3/DDAH2/ICAM1/ITGB2/SLC30A10/FYN/MIR21/SIRPA/INSR/RAC2/CFLAR/PDGFRB/CD34/NQO2/EDN1/JAK2/ASS1/AGT/PINK1/CAV1/CLU/BMP7/SOD2/GNAI2/MPV17L/CD36/FBLN5/TYROBP/PTGS2/P2RX4/TNF/HVCN1/PKD2/F2RL1/BNIP3/KLF4/IFNG/AKR1C3/PON3/TLR4/H19/XDH/HSP90AB1/FPR2/CD177 53

BP GO:0046638 positive regulation of alpha-beta T cell differentiation 22/2416 49/18862 3.24083658085279e-08 9.02588131863674e-07 6.28878519993323e-07 HLA-DRB1/ANXA1/NFKBIZ/MIR21/SOCS1/SASH3/HLA-DRA/CD86/IL12RB1/CD80/RIPK2/ADA/CD83/MALT1/IHH/NCKAP1L/CCL19/RUNX3/LILRB4/IL23A/PNP/IFNG 22

BP GO:0060337 type I interferon signaling pathway 33/2416 95/18862 3.33976028294012e-08 9.25812617968518e-07 6.45060186839598e-07 IFITM3/MMP12/IFITM2/ISG20/ZBP1/IFITM1/OAS2/STAT1/IP6K2/IRF9/MIR21/IRF1/IFIT3/IFNAR2/GBP2/EGR1/PSMB8/IRF6/MAVS/IRF4/XAF1/BST2/NLRC5/ISG15/MX2/PTPN6/WNT5A/IFI35/USP18/IRF8/OASL/IFIT2/HSP90AB1 33

BP GO:0030888 regulation of B cell proliferation 25/2416 61/18862 3.60290279651653e-08 9.89553026140025e-07 6.89471333119463e-07 LYN/CD40/GPR183/PTPRC/TNFSF13B/CTLA4/VAV3/CD74/SASH3/MNDA/CD38/BTK/ADA/CLCF1/FCGR2B/NCKAP1L/FCRL3/MIF/TYROBP/PKN1/BCL6/CD300A/CD22/TLR4/AHR 25

BP GO:0032623 interleukin-2 production 25/2416 61/18862 3.60290279651653e-08 9.89553026140025e-07 6.89471333119463e-07 IL1B/ANXA1/GBP1/NOD2/NR1H4/LAPTM5/PTPRC/CD34/SASH3/CD86/PDE4B/CR1/CD80/RIPK2/CD83/MALT1/LILRB4/IL1A/IRF4/PNP/PRKCQ/CD3E/LAG3/ZFP36/TNFAIP3 25

BP GO:0032963 collagen metabolic process 36/2416 109/18862 3.63166299706098e-08 9.92876672590984e-07 6.91787084664683e-07 MMP3/MMP12/CTSK/MMP10/MMP1/MMP9/HIF1A/COL1A2/MMP7/PPARG/MIR21/PDGFRB/COL15A1/TRAM2/VIM/MMP19/FAP/ADAMTS3/CIITA/CTSB/MMP28/IHH/COL1A1/GOT1/RCN3/MFAP4/SERPINB7/MMP14/SERPINH1/COL5A1/ENG/ITGA2/KLK6/IL6/ERRFI1/MMP13 36

BP GO:0016053 organic acid biosynthetic process 79/2416 335/18862 3.68001830490704e-08 1.00150269850438e-06 6.97797270505083e-07 OSBPL1A/LIPC/AMACR/EDN2/ACOX2/ACOT8/KYNU/CBS/IDO1/ABCB11/GLUL/ALDH18A1/IL1B/TBXAS1/ANXA1/OSBPL3/FADS1/CH25H/DEGS1/NR1H4/XBP1/LPGAT1/OTC/RIMKLA/ACOT4/MLYCD/CD74/PECR/DECR2/PSAT1/CYP27A1/EDN1/ACSS2/UGDH/SCD/ASS1/MTHFD1L/KMO/PTGDS/PTGES/UGP2/NAGS/EPHX2/PDK4/GSTM4/SCAP/LIPG/SHMT2/ALDH1A2/CYP3A4/SDSL/GOT1/BCAT1/ABCD3/MIF/ABHD3/PTGS2/LPL/MGLL/HPGD/HPGDS/HSD17B8/CTH/ASPA/FADS3/SLC35D1/APOC1/GGT5/GGT6/SLC27A2/GPT/APOC2/AKR1C3/ACSM3/STARD4/ALDH1A3/CYP2C9/ALOX5AP/CPS1 79

BP GO:0061138 morphogenesis of a branching epithelium 49/2416 173/18862 4.08144903212784e-08 1.10570164688554e-06 7.70397915394465e-07 FGFR2/TGM2/COL4A1/CCL11/GREM1/SULF1/CTSH/LAMA1/ADM/HOXA5/SOCS3/TACSTD2/TNC/PBX1/EDN1/FZD5/TIE1/RSPO3/AGT/LEF1/PLXND1/EDNRA/BMP7/KDR/SEMA3E/IHH/RASIP1/HGF/EPHA2/ESRP2/SPINT1/CLIC4/FGF2/MMP14/ENG/NRARP/TNF/HOXB7/WNT5A/DCHS1/PKD2/DDR1/GRHL2/NTN4/FOXF1/SFRP2/HOXB13/WNT2/LAMA5 49

BP GO:0071357 cellular response to type I interferon 33/2416 96/18862 4.46814147282673e-08 1.20498294923291e-06 8.39572189107e-07 IFITM3/MMP12/IFITM2/ISG20/ZBP1/IFITM1/OAS2/STAT1/IP6K2/IRF9/MIR21/IRF1/IFIT3/IFNAR2/GBP2/EGR1/PSMB8/IRF6/MAVS/IRF4/XAF1/BST2/NLRC5/ISG15/MX2/PTPN6/WNT5A/IFI35/USP18/IRF8/OASL/IFIT2/HSP90AB1 33

BP GO:0045123 cellular extravasation 27/2416 70/18862 4.78428789768804e-08 1.28443044460454e-06 8.94927252554733e-07 VCAM1/THY1/PECAM1/SELP/CX3CL1/ICAM1/ITGB2/CCL2/PTAFR/SIRPA/SELL/ITGAL/MADCAM1/CCL21/SELPLG/IL27RA/IL1R1/PLVAP/PIK3CD/ITGA4/TNF/GCNT1/ST3GAL4/SELE/JAM2/CXCL12/CD177 27

BP GO:0034340 response to type I interferon 34/2416 101/18862 5.06973817776667e-08 1.34891247944149e-06 9.39855127410222e-07 IFITM3/MMP12/IFITM2/ISG20/ZBP1/IFITM1/OAS2/STAT1/IP6K2/IRF9/MIR21/IRF1/IFIT3/IFNAR2/GBP2/EGR1/PSMB8/SHMT2/IRF6/MAVS/IRF4/XAF1/BST2/NLRC5/ISG15/MX2/PTPN6/WNT5A/IFI35/USP18/IRF8/OASL/IFIT2/HSP90AB1 34

BP GO:2000379 positive regulation of reactive oxygen species metabolic process 34/2416 101/18862 5.06973817776667e-08 1.34891247944149e-06 9.39855127410222e-07 DUOXA2/IL1B/DUOXA1/ZC3H12A/DDAH2/ICAM1/ITGB2/INSR/PDGFRB/NQO2/EDN1/JAK2/ASS1/AGT/CLU/SOD2/GNAI2/CD36/TYROBP/PTGS2/P2RX4/TNF/HVCN1/PKD2/F2RL1/KLF4/IFNG/AKR1C3/TLR4/H19/XDH/HSP90AB1/FPR2/CD177 34

BP GO:0043372 positive regulation of CD4-positive, alpha-beta T cell differentiation 17/2416 32/18862 5.33228552772723e-08 1.40731716056295e-06 9.80548604454403e-07 HLA-DRB1/ANXA1/NFKBIZ/MIR21/SOCS1/SASH3/HLA-DRA/CD86/IL12RB1/CD80/RIPK2/CD83/MALT1/NCKAP1L/CCL19/IL23A/IFNG 17

BP GO:0006968 cellular defense response 23/2416 54/18862 5.33647111220178e-08 1.40731716056295e-06 9.80548604454403e-07 CXCL9/LILRB2/NCF2/PNLIPRP2/IL33/MNDA/CCR6/SH2D1A/CXCR2/LY96/ITK/FOSL1/CLEC5A/LSP1/TYROBP/GNLY/C5AR1/PRF1/TRAT1/CCR5/ADORA2B/CCR3/TCIRG1 23

BP GO:0007249 I-kappaB kinase/NF-kappaB signaling 69/2416 282/18862 5.81692073230503e-08 1.52370787453813e-06 1.06164386525131e-06 SHISA5/TNIP3/CASP1/PRDX4/TGM2/APOL3/HLA-DRB1/IL1B/TRAF3IP2/BIRC3/TRIM22/SPHK2/ZC3H12A/CD40/STAT1/CX3CL1/PIM2/NOD2/NR1H4/FYN/GJA1/SIRPA/CFLAR/CD74/PLK2/SLC20A1/TNFRSF10B/UNC5CL/S100A4/PINK1/RIPK2/BTK/GOLT1B/RHOH/S100A12/LY96/MALT1/CCL21/PELI2/TLR2/CCL19/S100B/TIFAB/CCR7/LGALS1/LTF/LILRB4/CD36/MAVS/CARD8/BST2/TNFSF11/TRAF1/CTH/NLRC3/TLR8/DDX21/CD14/TNF/ECM1/NFKBIA/FLNA/WNT5A/TSPAN6/NDFIP2/F2RL1/TNFAIP3/TLR4/SECTM1 69

BP GO:0046394 carboxylic acid biosynthetic process 77/2416 327/18862 5.82894958715929e-08 1.52370787453813e-06 1.06164386525131e-06 OSBPL1A/LIPC/AMACR/EDN2/ACOX2/ACOT8/KYNU/CBS/IDO1/ABCB11/GLUL/ALDH18A1/IL1B/TBXAS1/ANXA1/OSBPL3/FADS1/CH25H/DEGS1/NR1H4/XBP1/LPGAT1/OTC/RIMKLA/ACOT4/MLYCD/CD74/PECR/DECR2/PSAT1/CYP27A1/EDN1/ACSS2/UGDH/SCD/ASS1/MTHFD1L/KMO/PTGDS/PTGES/UGP2/NAGS/EPHX2/PDK4/GSTM4/SCAP/LIPG/SHMT2/ALDH1A2/CYP3A4/GOT1/BCAT1/ABCD3/MIF/ABHD3/PTGS2/LPL/MGLL/HPGD/HPGDS/HSD17B8/CTH/ASPA/FADS3/SLC35D1/APOC1/GGT5/GGT6/SLC27A2/GPT/APOC2/AKR1C3/ACSM3/STARD4/ALDH1A3/CYP2C9/ALOX5AP 77

BP GO:0001894 tissue homeostasis 65/2416 260/18862 5.90405316585945e-08 1.53660073661669e-06 1.07062697032018e-06 LPCAT1/GCNT2/CDH3/SLC22A5/ABCA12/PBLD/PECAM1/IGKC/SERPINA3/SNX10/LAMC1/CTSH/ZG16B/ESAM/NOD2/GJA1/UBASH3B/RAC2/CD34/LDB2/SASH3/CLDN1/CDH5/CD38/TP53INP2/CORO1A/TFF1/DEF8/GPR137B/HOMER1/CHMP4B/PDK4/IHH/WWTR1/S1PR1/LTF/RCN3/CIB2/CSF1R/CA2/AKR1B1/VSIG1/OCLN/TNFSF11/SPP1/SH3GL2/P2RX4/PROM1/TJP3/CDHR1/IL6/JAM2/PIWIL4/USH1C/TNFAIP3/SLC1A1/AZGP1/CXADR/ACP5/TLR4/LYZ/TNFRSF11B/TCIRG1/TMEM119/TFF2 65

BP GO:0007584 response to nutrient 47/2416 165/18862 6.33473235949986e-08 1.64152195054866e-06 1.14373085392343e-06 SLC16A1/VCAM1/PDK2/C2/KYNU/CD40/CDKN2B/PPARG/NOD2/NR1H4/XBP1/OTC/SPARC/TNC/HMGCL/ALAD/CXCL10/SLC6A19/VDR/AQP3/ASS1/TRIM24/ADA/STC1/BMP7/ACSL4/COL1A1/SOD2/GNAI2/LIPG/ALDH1A2/LPL/CYP27B1/SLC27A4/LTA/SPP1/ITGA2/CD3E/BCKDHB/CAT/ACSL1/AKR1C3/BCHE/TNFRSF11B/SFRP2/SNAI2/ABCG5 47

BP GO:0048017 inositol lipid-mediated signaling 53/2416 196/18862 6.3673448193064e-08 1.64283009190762e-06 1.14464230176185e-06 PLCD3/LYN/FGR/PLCD1/ENTPD5/UNC5B/HCLS1/SELP/PLCE1/LTK/IRS1/PLD1/FYN/MIR21/PTAFR/TWIST1/INSR/SLC9A3R1/GAB1/PDGFRB/GPR143/TEK/ERBB3/PPP1R16B/EDN1/JAK2/AGT/SEMA4D/PRR5L/FBXL2/KDR/PIK3R5/HGF/PEAR1/PIK3AP1/DCN/CSF1R/CD160/HCST/PIK3CD/IER3/FGF2/PIP5K1B/NLRC3/CEP55/TNF/PTPN6/FN1/CAT/F2RL1/KLF4/OSM/CSF3 53

BP GO:0002718 regulation of cytokine production involved in immune response 30/2416 84/18862 6.80602600713217e-08 1.74844461217706e-06 1.2182292467394e-06 IRAK3/IL1B/SLC7A5/NOD2/LILRB1/LAPTM5/CD74/SASH3/TNFRSF1B/IL18R1/FZD5/BTK/MALT1/IL1R1/LILRB4/NR4A3/CD36/MAVS/CD160/BCL6/BST2/SMAD7/DDX21/TNF/TRPM4/WNT5A/IL6/F2RL1/TRIL/TLR4 30

BP GO:0001763 morphogenesis of a branching structure 51/2416 186/18862 6.90677248306302e-08 1.76671090124702e-06 1.23095628848808e-06 FGFR2/TGM2/COL4A1/CCL11/GREM1/SULF1/CTSH/LAMA1/ADM/HOXA5/SOCS3/TACSTD2/TNC/PBX1/EDN1/FZD5/TIE1/RSPO3/AGT/LEF1/PLXND1/EDNRA/BMP7/KDR/SEMA3E/IHH/RASIP1/HGF/EPHA2/LRRK2/ESRP2/SPINT1/CLIC4/FGF2/MMP14/ENG/NRARP/TNF/HOXB7/ERMN/WNT5A/DCHS1/PKD2/DDR1/GRHL2/NTN4/FOXF1/SFRP2/HOXB13/WNT2/LAMA5 51

BP GO:0048015 phosphatidylinositol-mediated signaling 52/2416 192/18862 7.99099251857466e-08 2.02901915365256e-06 1.4137196328434e-06 PLCD3/LYN/FGR/PLCD1/ENTPD5/UNC5B/HCLS1/SELP/PLCE1/LTK/IRS1/FYN/MIR21/PTAFR/TWIST1/INSR/SLC9A3R1/GAB1/PDGFRB/GPR143/TEK/ERBB3/PPP1R16B/EDN1/JAK2/AGT/SEMA4D/PRR5L/FBXL2/KDR/PIK3R5/HGF/PEAR1/PIK3AP1/DCN/CSF1R/CD160/HCST/PIK3CD/IER3/FGF2/PIP5K1B/NLRC3/CEP55/TNF/PTPN6/FN1/CAT/F2RL1/KLF4/OSM/CSF3 52

BP GO:0032663 regulation of interleukin-2 production 24/2416 59/18862 8.00032719980456e-08 2.02901915365256e-06 1.4137196328434e-06 IL1B/ANXA1/GBP1/NOD2/NR1H4/LAPTM5/PTPRC/CD34/SASH3/CD86/PDE4B/CR1/CD80/RIPK2/CD83/MALT1/LILRB4/IL1A/IRF4/PRKCQ/CD3E/LAG3/ZFP36/TNFAIP3 24

BP GO:0019722 calcium-mediated signaling 53/2416 198/18862 9.15078409893718e-08 2.31096073007058e-06 1.61016250090576e-06 VCAM1/PDK2/DEFB1/EDN2/SELP/PLCE1/GBP1/TMEM38B/CHP2/PTPRC/HPCA/GPR143/CCL20/ERBB3/NR5A2/EDN1/CCR6/CCL4/BTK/CLIC2/PLEK/ADA/CXCR2/ITPR1/KDR/P2RX5/CXCR4/DYRK2/LMCD1/CCR7/CXCR6/TMEM38A/LRRK2/PPP3CC/PLCG2/CCR1/TNFSF11/P2RX4/SPHK1/CXCR1/NFATC1/TNF/TRPM4/TBC1D10C/PTGFR/CD3E/CD22/SELE/TRAT1/CCR5/MCTP1/CCR3/FPR2 53

BP GO:0042908 xenobiotic transport 19/2416 40/18862 9.19142241383949e-08 2.31142943402883e-06 1.61048907051285e-06 ABCB1/SLC36A1/ABCG2/SLC22A5/SLC47A2/ABCB11/SLC7A5/LRRC8C/GJA1/ABCA8/CLDN1/SLC6A6/NR1I2/SLC22A4/ABCC1/ABCC3/PDZK1/SLC22A18/SLC15A2 19

BP GO:0090130 tissue migration 83/2416 365/18862 9.27240101648339e-08 2.3219962209345e-06 1.61785148208876e-06 S100P/SEMA5A/MMP9/PBLD/HIF1A/GLUL/PIK3R3/GREM1/ANXA1/EPB41L5/CTSH/ZC3H12A/CD40/EPB41L4B/PPARG/ADAMTS9/ITGB2/ROBO1/VEGFC/EFNA1/MIR21/TACSTD2/ANGPT2/SPARC/VIL1/SEMA4A/FSTL1/RHOJ/PLK2/MARVELD3/TEK/CDH5/CXCL13/EDN1/MMRN2/CCR6/EGR3/APOH/CALR/AGT/FAP/SERPINF1/RAB13/STC1/PLXND1/KDR/S100A2/ETS1/PTPRM/MEOX2/MAP4K4/ZEB2/PTPRR/PTP4A3/DUSP10/ANXA3/EPHA2/CLEC14A/ENPP2/DCN/MCC/FUT1/PTGS2/PLCG2/PIK3CD/PKN1/FGF2/P2RX4/TNF/FBXW7/EVL/ITGA2/WNT5A/ADAM9/STAT5A/KLF4/SH3BP1/IFNG/GRHL2/PRSS3/PFN2/FOXF1/HYAL1 83

BP GO:0050869 negative regulation of B cell activation 17/2416 33/18862 9.68380420819173e-08 2.41487335066204e-06 1.68256364683181e-06 LYN/LAPTM5/CTLA4/MNDA/CR1/BTK/HMGB3/SAMSN1/FCGR2B/BANK1/TYROBP/PKN1/BCL6/CD300A/TBC1D10C/INHBA/TNFAIP3 17

BP GO:0090132 epithelium migration 82/2416 360/18862 1.02536743620511e-07 2.5463291332427e-06 1.77415549817069e-06 S100P/SEMA5A/MMP9/PBLD/HIF1A/GLUL/PIK3R3/GREM1/ANXA1/EPB41L5/CTSH/ZC3H12A/CD40/EPB41L4B/PPARG/ADAMTS9/ITGB2/ROBO1/VEGFC/EFNA1/MIR21/TACSTD2/ANGPT2/SPARC/VIL1/SEMA4A/FSTL1/RHOJ/PLK2/MARVELD3/TEK/CDH5/CXCL13/EDN1/MMRN2/CCR6/EGR3/APOH/CALR/AGT/FAP/SERPINF1/RAB13/STC1/PLXND1/KDR/S100A2/ETS1/PTPRM/MEOX2/MAP4K4/ZEB2/PTPRR/PTP4A3/DUSP10/ANXA3/EPHA2/CLEC14A/ENPP2/DCN/MCC/FUT1/PTGS2/PLCG2/PIK3CD/PKN1/FGF2/P2RX4/TNF/FBXW7/EVL/ITGA2/WNT5A/ADAM9/STAT5A/KLF4/SH3BP1/IFNG/GRHL2/PRSS3/PFN2/HYAL1 82

BP GO:1903426 regulation of reactive oxygen species biosynthetic process 33/2416 99/18862 1.03662621108237e-07 2.56060849998144e-06 1.78410465072886e-06 DUOXA2/SLC25A33/IL1B/DUOXA1/SPHK2/ZC3H12A/DDAH2/ICAM1/ITGB2/SLC30A10/FYN/MIR21/SIRPA/INSR/CFLAR/CD34/EDN1/JAK2/ASS1/CAV1/CLU/SOD2/MPV17L/CD36/PTGS2/P2RX4/TNF/PKD2/KLF4/IFNG/TLR4/H19/HSP90AB1 33

BP GO:0002548 monocyte chemotaxis 26/2416 68/18862 1.03971016274414e-07 2.56060849998144e-06 1.78410465072886e-06 LYN/CCL11/GREM1/ANXA1/CX3CL1/CCL2/CCL18/CXCL10/SLAMF8/CCL20/CCL22/CCL4/S100A12/PLA2G7/CCL21/CXCL17/CCL19/AIF1/CCL13/CCR1/TNFSF11/IL6/SERPINE1/S100A7/FPR2/CXCL12 26

BP GO:0002440 production of molecular mediator of immune response 69/2416 286/18862 1.04442751357824e-07 2.56164114441411e-06 1.78482414601089e-06 IRAK3/CD55/IGKV1D-13/IGKC/HLA-DRB1/IL1B/SLC7A5/SPHK2/CD40/IGLV2-23/IGLV3-19/NOD2/XBP1/LILRB1/LAPTM5/PTPRC/IL33/IGLV1-44/CD74/SASH3/TNFRSF1B/CD86/IL18R1/KLK3/IL13RA2/CCR6/FZD5/CR1/BTK/IGLV6-57/CLCF1/MALT1/SPINK5/FCGR2B/MAD2L2/IGKV3-20/IGKV4-1/FCRL3/IL27RA/IL1R1/LILRB4/NR4A3/CD36/MAVS/CD160/TNFSF13/PKN1/BCL6/BST2/SWAP70/BATF/DNAJB9/SMAD7/DDX21/TNF/TRPM4/WNT5A/CD22/IL6/F2RL1/TRIL/IGKV1-5/IGLV4-60/TLR4/VPREB3/HLA-DQB1/GAPT/KLK7/CHGA 69

BP GO:0034612 response to tumor necrosis factor 75/2416 320/18862 1.05694676305971e-07 2.58172242124422e-06 1.79881578096228e-06 CHI3L1/VCAM1/CASP1/PSMB9/CASP4/MAP3K5/CCL11/PCK2/BIRC3/ZC3H12A/PPARGC1A/CD40/GBP1/PIAS3/STAT1/CX3CL1/ICAM1/NR1H4/CCL2/PCK1/AIM2/LAPTM5/TNFSF13B/CCL18/TNFRSF1B/GBP2/CLDN1/CCL20/EDN1/CCL22/JAK2/ASS1/CCL4/TNFSF8/CEBPA/SGMS1/CCDC3/HYAL2/CD27/CXCL16/PSMB8/CCL21/COL1A1/TNFRSF9/CCL19/SPATA2/TNFSF9/PLVAP/TNFSF13/CCL13/CARD8/OCLN/LTA/TNFSF11/TRAF1/TNFRSF12A/SPHK1/LTB/CD14/GGT5/TNF/NFKBIA/ADAMTS12/SELE/ZFP36/ADAM9/F2RL1/TNFAIP3/ENDOG/FABP4/TCL1A/PSMA8/HYAL1/TNFRSF11B/TNFRSF17 75

BP GO:0014068 positive regulation of phosphatidylinositol 3-kinase signaling 31/2416 90/18862 1.07606683372898e-07 2.61769727715294e-06 1.82388127134729e-06 LYN/FGR/UNC5B/HCLS1/SELP/FYN/MIR21/INSR/GAB1/PDGFRB/TEK/ERBB3/JAK2/AGT/SEMA4D/PRR5L/KDR/PIK3R5/HGF/PIK3AP1/DCN/HCST/PIK3CD/FGF2/TNF/PTPN6/FN1/CAT/F2RL1/OSM/CSF3 31

BP GO:0033628 regulation of cell adhesion mediated by integrin 21/2416 48/18862 1.1534815426035e-07 2.79461381866539e-06 1.94714791851554e-06 LYN/EFNA1/MUC1/PLAU/IFT74/CXCL13/PODXL/ADA/CCL21/NCKAP1L/EPHA2/SWAP70/PTPN6/CD3E/FERMT3/SKAP1/LIF/SERPINE1/ADAM9/SFRP2/SNAI2 21

BP GO:0002920 regulation of humoral immune response 41/2416 138/18862 1.22145631267787e-07 2.94731968565187e-06 2.05354577179382e-06 CD55/C2/C4BPB/CFB/IGKC/SERPING1/CFP/IL1B/C3/C1R/IGLV2-23/IGLV3-19/NOD2/SPNS2/PTPRC/IGLV1-44/CFHR2/CXCL13/CFI/C1S/CR1/IGLV6-57/CLU/C4BPA/IGHG1/SPINK5/FCGR2B/IGKV3-20/IGKV4-1/CCR7/GATA6/IGHV1-69/CD19/LTA/C3AR1/TNF/C5AR1/PTPN6/IGKV1-5/CR2/KLK7 41

BP GO:0051770 positive regulation of nitric-oxide synthase biosynthetic process 11/2416 15/18862 1.23979916606154e-07 2.97951735069628e-06 2.07597950344345e-06 NOD2/CCL2/IL33/JAK2/NAMPT/KDR/TLR2/LRRK2/IFNG/TLR4/MAP2K6 11

BP GO:0010631 epithelial cell migration 81/2416 357/18862 1.45887188484435e-07 3.49191824645475e-06 2.43299496331049e-06 S100P/SEMA5A/MMP9/PBLD/HIF1A/GLUL/PIK3R3/GREM1/ANXA1/EPB41L5/CTSH/ZC3H12A/CD40/EPB41L4B/PPARG/ADAMTS9/ITGB2/ROBO1/VEGFC/EFNA1/MIR21/TACSTD2/ANGPT2/SPARC/VIL1/SEMA4A/FSTL1/RHOJ/PLK2/MARVELD3/TEK/CDH5/CXCL13/EDN1/MMRN2/CCR6/EGR3/APOH/CALR/AGT/FAP/SERPINF1/RAB13/STC1/PLXND1/KDR/S100A2/ETS1/PTPRM/MEOX2/MAP4K4/ZEB2/PTPRR/PTP4A3/DUSP10/ANXA3/EPHA2/CLEC14A/ENPP2/DCN/MCC/FUT1/PTGS2/PLCG2/PIK3CD/PKN1/FGF2/P2RX4/TNF/FBXW7/EVL/ITGA2/WNT5A/ADAM9/STAT5A/KLF4/SH3BP1/IFNG/PRSS3/PFN2/HYAL1 81

BP GO:0014074 response to purine-containing compound 42/2416 144/18862 1.52330209393308e-07 3.63155219193646e-06 2.53028495181726e-06 DUOX2/AQP8/HSPA5/CASP1/PPARGC1A/STAT1/BSG/TMEM38B/PPARG/HSP90B1/PCK1/PTAFR/AQP9/SPARC/THBD/TEK/IGFBP5/P2RY1/DGKQ/ASS1/MMP19/EEF2K/TRPV1/SLC26A3/STC1/FOSL1/P2RX5/COL1A1/FDX1/NME1/TMEM38A/CIB2/PANX1/SRD5A1/P2RX4/TRPM4/FOS/PKD2/AQP1/FOSB/AHR/CPS1 42

BP GO:0033559 unsaturated fatty acid metabolic process 36/2416 115/18862 1.68189678582955e-07 3.99366726834427e-06 2.7825887272374e-06 ACOX1/CYP2B6/PTGR1/EDN2/ACOT8/CYP4F2/IL1B/TBXAS1/ANXA1/ZADH2/FADS1/DEGS1/ACAA1/CYP4F12/CD74/DECR2/EDN1/SCD/CES2/PTGDS/PTGES/EPHX2/FAAH/CYP2J2/MIF/PTGS2/MGLL/HPGD/HPGDS/FADS3/GSTA1/CYP2S1/EPHX1/ACSL1/AKR1C3/CYP2C9 36

BP GO:0019882 antigen processing and presentation 59/2416 234/18862 1.73202252208574e-07 4.09637072683771e-06 2.85414738915132e-06 OSBPL1A/SEC13/HLA-DMA/SEC24D/TAP2/PSMB9/HLA-DRB1/CTSH/LILRB2/TAP1/IFI30/NCF2/ICAM1/NOD2/CTSE/SEC24A/MR1/CD74/HLA-DRA/RFTN1/KIFAP3/FCGR1B/HLA-DMB/CALR/HLA-DOB/NCF4/RAB34/FCER1G/RILP/PSMB8/CCL21/FCGR2B/CLEC4A/CD1C/CCL19/CCR7/WAS/CD36/HLA-DPA1/RAB32/RAB33A/RAB8B/FCGR1A/SH3GL2/ITGAV/HLA-DPB1/CD8A/CD1D/LAG3/CD207/CD1A/SEC24C/AP1M2/AZGP1/CD1B/HLA-DQB1/PSMA8/ERAP2/HLA-DQA1 59

BP GO:0031295 T cell costimulation 23/2416 57/18862 1.77329172974831e-07 4.17739869932804e-06 2.91060365045021e-06 LYN/LILRB2/FYN/CD274/TNFSF13B/CTLA4/CD86/VAV1/ICOS/CD80/MAP3K8/CAV1/HHLA2/CD5/LCK/CCL21/CCL19/CCR7/LGALS1/LILRB4/CD160/PTPN6/CD3E 23

BP GO:0015849 organic acid transport 75/2416 324/18862 1.80060222207468e-07 4.22503513526184e-06 2.94379434980713e-06 SLC6A14/SLC23A1/SLC38A4/SLC16A1/SFXN1/ABCB1/SLC36A1/ABCG2/PLA2G2A/PDPN/CPT1A/SLC3A1/CYP4F2/SLC26A2/ABCB11/SLC25A20/PLA2G12B/CPT2/IL1B/ANXA1/RGS2/PPFIA3/SLC7A5/CROT/LRRC8C/SFXN3/PPARG/SLC6A20/NR1H4/SLC10A2/GJA1/AQP9/FABP3/EMB/SLC9A3R1/SLC7A11/SLC6A19/SLC7A7/PRAF2/EDN1/SLC6A6/KMO/PTGES/SLC10A1/SLC16A2/SLC26A3/STXBP1/SLC22A4/PLA2G12A/ABCC1/ACSL4/PLA2G2D/SLC1A3/RGS4/SLC1A4/ABCD3/NFKBIE/CD36/XK/KCNJ10/SLC13A2/SLC27A4/ABCC3/LLGL2/TNFSF11/SLC25A10/FABP1/SLCO1B3/P2RX4/SLC27A2/SLC1A1/ACSL1/FABP4/SLC25A32/MAP2K6 75

BP GO:0046683 response to organophosphorus 39/2416 130/18862 1.85383470390759e-07 4.33288424913304e-06 3.01893824846871e-06 DUOX2/AQP8/HSPA5/CASP1/STAT1/BSG/HSP90B1/PCK1/PTAFR/AQP9/SPARC/THBD/TEK/IGFBP5/P2RY1/DGKQ/ASS1/MMP19/EEF2K/TRPV1/SLC26A3/STC1/FOSL1/P2RX5/COL1A1/FDX1/NME1/CIB2/PANX1/CRLS1/SRD5A1/P2RX4/TRPM4/FOS/PKD2/AQP1/FOSB/AHR/CPS1 39

BP GO:0001890 placenta development 40/2416 135/18862 1.87787228241501e-07 4.34177674024897e-06 3.02513409400957e-06 FGFR2/PLCD3/HIF1A/HSD17B2/EOMES/ADM/BSG/PPARG/GJA1/SOCS3/HTRA1/VDR/JUNB/CEBPB/FZD5/MME/RSPO3/OVOL2/GJB3/CEBPA/LEF1/ADA/STC1/BMP7/FOSL1/CDX2/DCN/ADAM19/BMP5/CYP27B1/SPINT1/GJB2/SPP1/PKD2/LIF/GRHL2/PHLDA2/NDP/HSP90AB1/WNT2 40

BP GO:0033865 nucleoside bisphosphate metabolic process 41/2416 140/18862 1.88677881832967e-07 4.34177674024897e-06 3.02513409400957e-06 ACSF2/ENPP1/PDK2/HMGCS2/ACOT8/KYNU/SLC26A2/CROT/ACAT1/SULT1A2/ACOT11/TDO2/PDHA1/ACOT4/BPNT1/MLYCD/HMGCL/SULT1A1/PPT1/ACSS2/PANK3/ACOT9/TPST2/SCD/SUCLG2/PANK1/PDK4/ACSL4/TPST1/PAPSS2/PDP1/PAPSS1/FAR2/HSD17B8/ACOT13/SULT1B1/HMGCR/PDK1/ACSL1/ACSM3/SULT1C2 41

BP GO:0033875 ribonucleoside bisphosphate metabolic process 41/2416 140/18862 1.88677881832967e-07 4.34177674024897e-06 3.02513409400957e-06 ACSF2/ENPP1/PDK2/HMGCS2/ACOT8/KYNU/SLC26A2/CROT/ACAT1/SULT1A2/ACOT11/TDO2/PDHA1/ACOT4/BPNT1/MLYCD/HMGCL/SULT1A1/PPT1/ACSS2/PANK3/ACOT9/TPST2/SCD/SUCLG2/PANK1/PDK4/ACSL4/TPST1/PAPSS2/PDP1/PAPSS1/FAR2/HSD17B8/ACOT13/SULT1B1/HMGCR/PDK1/ACSL1/ACSM3/SULT1C2 41

BP GO:0034032 purine nucleoside bisphosphate metabolic process 41/2416 140/18862 1.88677881832967e-07 4.34177674024897e-06 3.02513409400957e-06 ACSF2/ENPP1/PDK2/HMGCS2/ACOT8/KYNU/SLC26A2/CROT/ACAT1/SULT1A2/ACOT11/TDO2/PDHA1/ACOT4/BPNT1/MLYCD/HMGCL/SULT1A1/PPT1/ACSS2/PANK3/ACOT9/TPST2/SCD/SUCLG2/PANK1/PDK4/ACSL4/TPST1/PAPSS2/PDP1/PAPSS1/FAR2/HSD17B8/ACOT13/SULT1B1/HMGCR/PDK1/ACSL1/ACSM3/SULT1C2 41

BP GO:0045429 positive regulation of nitric oxide biosynthetic process 18/2416 38/18862 2.11548131765292e-07 4.84933409738901e-06 3.37877481706104e-06 IL1B/DDAH2/ICAM1/ITGB2/INSR/EDN1/JAK2/ASS1/CLU/CD36/PTGS2/P2RX4/TNF/PKD2/KLF4/IFNG/TLR4/HSP90AB1 18

BP GO:0002335 mature B cell differentiation 16/2416 31/18862 2.24029306846327e-07 5.11576501457513e-06 3.56441062919443e-06 GPR183/XBP1/SLAMF8/DOCK11/CR1/ST3GAL1/ADA/CMTM7/MALT1/FCGR2B/POU2AF1/LGALS1/PLCG2/CD19/IL6/ITM2A 16

BP GO:1901654 response to ketone 51/2416 193/18862 2.46159233389588e-07 5.58646502245841e-06 3.89237098438687e-06 HSD3B2/MSN/PCK2/RAMP2/IGFBP7/SPHK2/TRERF1/PPARG/ICAM1/PCK1/PTAFR/DCPS/CFLAR/TNC/DDIT4/HPCA/CATSPERB/CLDN1/ADCY3/CD38/EDN1/ASS1/CALR/SERPINF1/FIBIN/CAV1/FOSL1/CCL21/FDX1/NME1/TLR2/CCL19/CCR7/MAP4K1/AKR1B1/GJB2/SPP1/SRD5A1/ADCY6/FOS/PTGFR/AQP1/KLF4/AKR1C3/FOSB/ABCB4/HOXB13/SCNN1B/ERRFI1/AHR/CPS1 51

BP GO:0002526 acute inflammatory response 34/2416 107/18862 2.46516829011168e-07 5.58646502245841e-06 3.89237098438687e-06 S100A8/VNN1/VCAM1/C2CD4A/SERPINA1/SERPINA3/IL1B/C3/OSMR/PPARG/ICAM1/F3/C2CD4B/APOL2/CEBPB/REG3A/ASS1/PTGES/BTK/PLA2G2D/FCGR2B/CCR7/SAA4/TREM1/IL1A/PTGS2/TNFSF11/TNF/KLKB1/IL6/FN1/CD163/ADCYAP1/OSM 34

BP GO:0044706 multi-multicellular organism process 53/2416 204/18862 2.60148448914503e-07 5.87304831640318e-06 4.09204797036569e-06 TIMP1/ITGA5/MMP9/IDO1/IL1B/RGS2/RAMP2/IGFBP7/ACVR2A/ADM/MAFF/BSG/MAGED2/MMP7/ARHGDIB/GJA1/MIR21/PTAFR/ANGPT2/PAM/ACVR1C/THBD/APOL2/VDR/IGFBP5/CD38/JUNB/EDN1/CALR/STS/STC1/PNOC/DDO/ETS1/FOSL1/UCP2/ACSL4/IHH/CYP27B1/HPGD/AKR1B1/GJB2/SPP1/HSD11B2/FOS/PTGFR/ITGA2/SEMG1/LIF/DDR1/ADCYAP1/FOSB/PTHLH 53

BP GO:0031960 response to corticosteroid 43/2416 152/18862 2.79896715546499e-07 6.29503556474391e-06 4.38606769744167e-06 TAT/HSD3B2/PCK2/ANXA1/IGFBP7/ADM/ICAM1/PCK1/PTAFR/PAM/SPARC/CFLAR/ALAD/DDIT4/CLDN1/EDN1/HNMT/IL1RN/ASS1/SERPINF1/FIBIN/STC1/FOSL1/COL1A1/ANXA3/GOT1/GJB2/SRD5A1/ENG/HSD11B2/TNF/FOS/ZFP36/IL6/ADAM9/AQP1/AKR1C3/BCHE/ADCYAP1/FOSB/SCNN1B/ERRFI1/CPS1 43

BP GO:0070374 positive regulation of ERK1 and ERK2 cascade 54/2416 210/18862 2.88450730472897e-07 6.46036493065393e-06 4.5012609769392e-06 GCNT2/CHI3L1/FGFR2/PLA2G2A/PDE8A/CCL11/HLA-DRB1/FERMT2/FGFR3/GPR183/MT3/CX3CL1/ICAM1/NOD2/CD44/CCL2/SLC30A10/MIR21/PTPRC/CFLAR/CCL18/PDGFRB/CD74/IL26/NQO2/TEK/RAMP3/CCL20/P2RY1/CCL22/CCL4/RIPK2/RASGRP1/SLAMF1/KDR/CCL21/GNAI2/CCL19/CCR7/MIF/CSF1R/CD36/CCL13/FGF2/CCR1/TNFSF11/TNF/FBXW7/C5AR1/S100A7/F2RL1/ADCYAP1/TLR4/FPR2 54

BP GO:0003158 endothelium development 40/2416 137/18862 2.89415677262517e-07 6.46036493065393e-06 4.5012609769392e-06 PDPN/MSN/PECAM1/IL1B/TNMD/ICAM1/ITGAX/GJA1/MIR21/FSTL1/CD34/CXCL10/COL15A1/HEG1/CLDN1/CDH5/GJA4/PPP1R16B/TIE1/ZEB1/STC1/KDR/CXCR4/S1PR1/SOX17/COL18A1/CLIC4/ROBO4/S1PR3/APOLD1/ENG/TNF/HOXB5/MYADM/TJP3/NRG1/ADAMTS12/F2RL1/XDH/MARVELD2 40

BP GO:0050766 positive regulation of phagocytosis 25/2416 67/18862 3.1590991451145e-07 7.02545929286657e-06 4.89499062351795e-06 C2/RAB31/IL1B/C3/PPARG/NOD2/CCL2/IL15RA/SIRPA/PTPRC/CALR/APPL2/FCER1G/FCGR2B/NCKAP1L/CD36/CD300LF/TNF/ITGA2/SIRPB1/IL2RB/F2RL1/IFNG/STAP1/FPR2 25

BP GO:1904407 positive regulation of nitric oxide metabolic process 18/2416 39/18862 3.45871794460933e-07 7.65738666542577e-06 5.33528618776133e-06 IL1B/DDAH2/ICAM1/ITGB2/INSR/EDN1/JAK2/ASS1/CLU/CD36/PTGS2/P2RX4/TNF/PKD2/KLF4/IFNG/TLR4/HSP90AB1 18

BP GO:0043122 regulation of I-kappaB kinase/NF-kappaB signaling 60/2416 244/18862 3.46895033500832e-07 7.65738666542577e-06 5.33528618776133e-06 SHISA5/TNIP3/CASP1/TGM2/APOL3/HLA-DRB1/IL1B/TRAF3IP2/BIRC3/TRIM22/SPHK2/ZC3H12A/CD40/STAT1/CX3CL1/PIM2/NOD2/NR1H4/FYN/GJA1/CFLAR/CD74/PLK2/SLC20A1/TNFRSF10B/UNC5CL/S100A4/PINK1/RIPK2/GOLT1B/RHOH/S100A12/MALT1/CCL21/PELI2/CCL19/S100B/CCR7/LGALS1/LTF/LILRB4/CD36/MAVS/CARD8/BST2/TNFSF11/TRAF1/CTH/NLRC3/DDX21/TNF/ECM1/FLNA/WNT5A/TSPAN6/NDFIP2/F2RL1/TNFAIP3/TLR4/SECTM1 60

BP GO:1905153 regulation of membrane invagination 11/2416 16/18862 3.50505761571725e-07 7.66986050731473e-06 5.34397734040209e-06 RAB31/C3/PPARG/SYT11/APPL2/NCKAP1L/CD36/CD300A/ITGA2/F2RL1/STAP1 11

BP GO:0006690 icosanoid metabolic process 37/2416 123/18862 3.51320791694114e-07 7.66986050731473e-06 5.34397734040209e-06 ACOX1/CYP2B6/PTGR1/EDN2/CYP4F2/IL1B/TBXAS1/ANXA1/ZADH2/FADS1/CYP4F12/CD74/EDN1/MAPKAPK2/CES2/PTGDS/PTGES/EPHX2/ABCC1/FAAH/TLR2/CYP2J2/MIF/PTGS2/MGLL/HPGD/HPGDS/GGT5/DPEP2/GSTA1/GGT6/CYP2S1/EPHX1/AKR1C3/PON3/CYP2C9/ALOX5AP 37

BP GO:1903409 reactive oxygen species biosynthetic process 37/2416 123/18862 3.51320791694114e-07 7.66986050731473e-06 5.34397734040209e-06 DUOX2/ACOX1/DUOXA2/SLC25A33/IL1B/DUOXA1/SPHK2/ZC3H12A/DDAH2/ICAM1/ITGB2/SLC30A10/FYN/MIR21/SIRPA/INSR/CFLAR/CD34/EDN1/JAK2/ASS1/NOS2/CAV1/CLU/SOD2/SPR/MPV17L/CD36/PTGS2/P2RX4/TNF/PKD2/KLF4/IFNG/TLR4/H19/HSP90AB1 37

BP GO:0015711 organic anion transport 83/2416 376/18862 3.53617144077641e-07 7.69181817044797e-06 5.35927634800728e-06 SLC6A14/SLC23A1/SLC16A1/SFXN1/SLC36A1/ABCG2/PLA2G2A/SLC17A4/SLC3A1/CYP4F2/SLC26A2/ABCB11/PLA2G12B/IL1B/ANXA1/RGS2/PPFIA3/SLC16A14/SLC7A5/LRRC8C/SFXN3/SLC6A20/NR1H4/SLC10A2/CA12/GJA1/SLC25A23/AQP9/SLC17A9/EMB/SLC16A9/SLC9A3R1/GLTP/SLC7A11/SLC16A5/SLC7A7/PRAF2/EDN1/SLCO5A1/SLC6A6/CR1/SLC35D2/KMO/NOS2/PTGES/SLC10A1/SLC16A2/SLC16A4/SLC26A3/STXBP1/PLA2G12A/SLC4A4/ABCC1/SLC4A11/PLA2G2D/SLC2A6/SLC1A3/SLC25A25/RGS4/SLC1A4/NFKBIE/CA1/CD36/CA2/KCNJ10/SLC13A2/SLC27A4/ABCC3/LLGL2/SLC16A6/TNFSF11/SLC25A10/SLCO1B3/SLC35D1/CYB5R2/P2RX4/CA7/SLC1A1/AQP1/SLC25A32/ABCB4/MAP2K6/CA4 83

BP GO:0032102 negative regulation of response to external stimulus 86/2416 394/18862 3.64049633470418e-07 7.8899484199407e-06 5.49732365183081e-06 IRAK3/SEMA5A/IFI16/MMP12/SERPING1/HLA-DRB1/GREM1/SEC14L1/PADI2/SERPINB9/CX3CL1/CST7/NUCB2/PPARG/NOD2/NR1H4/CCL2/ROBO1/LILRB1/GJA1/SOCS3/MIR21/ANGPT2/UBASH3B/SIRPA/PTPRC/PLAU/SEMA4A/SYT11/PLAUR/CD34/MICB/TNFRSF1B/THBD/HTRA1/TEK/CDH5/SLAMF8/CXCL13/TFPI/IL2RA/EDN1/LRFN5/APOH/CR1/FAP/SERPINF1/SEMA6A/ADA/SEMA4D/MMP28/SEMA3E/TNFAIP8L2/NMI/SPINK5/FCGR2B/HGF/DUSP10/CXCL17/AIF1/LTF/MIF/TNFAIP6/CARD8/FGF2/LILRA2/NLRC5/SPP1/NLRC3/TRAFD1/PARP14/ENPP3/TNF/SEMA6D/WNT5A/TSPAN6/KLKB1/CALCRL/SERPINE1/TNFAIP3/KLF4/ADCYAP1/SH2B3/STAP1/FOXF1/FPR2 86

BP GO:0031294 lymphocyte costimulation 23/2416 59/18862 3.7234054517445e-07 8.04039727985406e-06 5.60214893483296e-06 LYN/LILRB2/FYN/CD274/TNFSF13B/CTLA4/CD86/VAV1/ICOS/CD80/MAP3K8/CAV1/HHLA2/CD5/LCK/CCL21/CCL19/CCR7/LGALS1/LILRB4/CD160/PTPN6/CD3E 23

BP GO:0046942 carboxylic acid transport 67/2416 284/18862 3.85101141887331e-07 8.28593070631225e-06 5.77322441476542e-06 SLC6A14/SLC23A1/SLC16A1/SFXN1/SLC36A1/ABCG2/PLA2G2A/SLC17A4/SLC3A1/CYP4F2/SLC26A2/ABCB11/PLA2G12B/IL1B/ANXA1/RGS2/PPFIA3/SLC16A14/SLC7A5/LRRC8C/SFXN3/SLC6A20/NR1H4/SLC10A2/GJA1/AQP9/EMB/SLC16A9/SLC9A3R1/SLC7A11/SLC16A5/SLC7A7/PRAF2/EDN1/SLC6A6/SLC35D2/KMO/NOS2/PTGES/SLC10A1/SLC16A2/SLC16A4/SLC26A3/STXBP1/PLA2G12A/ABCC1/PLA2G2D/SLC1A3/RGS4/SLC1A4/NFKBIE/CD36/KCNJ10/SLC13A2/SLC27A4/ABCC3/LLGL2/SLC16A6/TNFSF11/SLC25A10/SLCO1B3/SLC35D1/P2RX4/SLC1A1/SLC25A32/ABCB4/MAP2K6 67

BP GO:0051216 cartilage development 49/2416 185/18862 3.89540854737566e-07 8.35130753322264e-06 5.81877573623513e-06 TIMP1/CHI3L1/BMP3/PRRX1/LUM/HIF1A/GREM1/CREB3L2/HOXA3/SULF1/FGFR3/TGFBI/HOXA5/BGN/CD44/CHST11/MIR21/SCIN/EDN1/HES5/MGP/CHRDL2/TRPS1/STC1/HYAL2/BMP7/SATB2/SULF2/IHH/COL1A1/CHSY1/RUNX3/EFEMP1/CSGALNACT1/BMP5/FGF2/PKDCC/SERPINH1/SMAD7/GLG1/ECM1/WNT5A/ADAMTS12/HYAL1/FRZB/SFRP2/SNAI2/PTHLH/OSR1 49

BP GO:1903428 positive regulation of reactive oxygen species biosynthetic process 22/2416 55/18862 3.92273625720498e-07 8.37975200463859e-06 5.83859442922982e-06 DUOXA2/IL1B/DUOXA1/DDAH2/ICAM1/ITGB2/INSR/EDN1/JAK2/ASS1/CLU/SOD2/CD36/PTGS2/P2RX4/TNF/PKD2/KLF4/IFNG/TLR4/H19/HSP90AB1 22

BP GO:0002544 chronic inflammatory response 12/2416 19/18862 4.00168979846245e-07 8.51788257101292e-06 5.93483693794524e-06 S100A8/VNN1/VCAM1/IDO1/CCL11/S100A9/GJA1/CXCL13/PTGES/LTA/TNF/TNFAIP3 12

BP GO:0050672 negative regulation of lymphocyte proliferation 28/2416 81/18862 4.02882940154379e-07 8.5451328232032e-06 5.95382355837807e-06 LYN/IDO1/HLA-DRB1/TWSG1/LILRB2/LILRB1/CD274/LST1/CTLA4/MNDA/CD86/IL2RA/CEBPB/BTN2A2/CR1/CD80/BTK/PLA2G2D/IHH/FCGR2B/LRRC32/LILRB4/TYROBP/PKN1/CRTAM/CD300A/PTPN6/PRKAR1A 28

BP GO:0052547 regulation of peptidase activity 96/2416 455/18862 4.08556128528882e-07 8.63473236181608e-06 6.01625206064367e-06 TIMP1/PI3/S100A8/COL6A3/IFI16/CASP1/SERPINB5/SERPINA1/PSMB9/MMP9/LYN/BCL2L10/MAP3K5/LAMP3/SERPINA3/SERPING1/BIRC3/C3/SPINK2/CTSH/SERPINB9/MT3/S100A9/TNFAIP8/CST7/PPARG/CD44/ROBO1/FYN/EFNA1/MIR21/AIM2/LAPTM5/FAM162A/PCOLCE/VIL1/CFLAR/F3/ACVR1C/PLAUR/TNFRSF10B/TFPI/SERPINA6/JAK2/TIMP3/CR1/AGT/APH1B/PINK1/RIPK2/STAT3/SERPINF1/VCP/CAV1/CD27/MALT1/LCK/HERPUD1/SPINK5/PSMB8/HGF/CSTA/SLPI/CYCS/SERPINI1/LTF/SPOCK2/RCN3/PAPLN/SERPINB7/NLRP7/SPINT1/CARD8/NLRP1/BST2/FABP1/SERPINH1/PMAIP1/TNF/ECM1/TIMP2/SEMG1/SPINK4/SH3RF1/FN1/SERPINE1/SLC1A1/AQP1/KLF4/SERPINB3/GRAMD4/COL7A1/TFPI2/PCSK1N/XDH/SFRP2 96

BP GO:0071356 cellular response to tumor necrosis factor 69/2416 296/18862 4.18163525569828e-07 8.80655340069321e-06 6.13596841500083e-06 CHI3L1/VCAM1/CASP1/PSMB9/CASP4/MAP3K5/CCL11/PCK2/BIRC3/ZC3H12A/PPARGC1A/CD40/GBP1/PIAS3/STAT1/CX3CL1/ICAM1/NR1H4/CCL2/PCK1/AIM2/LAPTM5/TNFSF13B/CCL18/TNFRSF1B/GBP2/CLDN1/CCL20/EDN1/CCL22/JAK2/ASS1/CCL4/TNFSF8/CEBPA/SGMS1/CCDC3/HYAL2/CD27/PSMB8/CCL21/COL1A1/TNFRSF9/CCL19/SPATA2/TNFSF9/PLVAP/TNFSF13/CCL13/CARD8/OCLN/LTA/TNFSF11/TRAF1/TNFRSF12A/SPHK1/LTB/TNF/NFKBIA/ADAMTS12/ZFP36/F2RL1/TNFAIP3/FABP4/TCL1A/PSMA8/HYAL1/TNFRSF11B/TNFRSF17 69

BP GO:0032602 chemokine production 31/2416 95/18862 4.2730853249027e-07 8.96746075226059e-06 6.24808065483363e-06 S100A8/HIF1A/IL1B/S100A9/CXCL6/NOD2/NR1H4/TWIST1/SIRPA/IL33/CD74/RIPK2/EGR1/TLR2/AIF1/EPHA2/LILRB4/CSF1R/MAVS/LPL/MCOLN2/TNF/WNT5A/IL6/F2RL1/KLF4/IFNG/ADCYAP1/TLR4/APOD/SNAI2 31

BP GO:0032755 positive regulation of interleukin-6 production 29/2416 86/18862 4.5844634535943e-07 9.58715866084985e-06 6.67985533681608e-06 IL1B/LILRB2/NOD2/XBP1/PTAFR/TWIST1/IL33/CD74/RIPK2/STAT3/HYAL2/POU2AF1/TLR2/AIF1/TLR1/CD36/MAVS/IL1A/TYROBP/LPL/LILRA2/TLR8/TNF/WNT5A/IL6/F2RL1/IFNG/ADCYAP1/TLR4 29

BP GO:0001704 formation of primary germ layer 35/2416 115/18862 5.29589871587268e-07 1.10362085127976e-05 7.68948120504885e-06 FGFR2/DUSP4/ITGA5/MMP9/TWSG1/EOMES/EPB41L5/COL5A2/ITGB2/EYA2/GJA1/LEF1/BMP7/COL4A2/EPHA2/GATA6/LAMB1/SOX17/COL12A1/NANOG/MMP14/COL5A1/ITGAV/ITGA4/ITGA2/WNT5A/INHBA/FN1/KIF16B/KLF4/COL7A1/FOXF1/PRKAR1A/SFRP2/DKK1 35

BP GO:0032945 negative regulation of mononuclear cell proliferation 28/2416 82/18862 5.37538711947856e-07 1.11628248195443e-05 7.77770115031833e-06 LYN/IDO1/HLA-DRB1/TWSG1/LILRB2/LILRB1/CD274/LST1/CTLA4/MNDA/CD86/IL2RA/CEBPB/BTN2A2/CR1/CD80/BTK/PLA2G2D/IHH/FCGR2B/LRRC32/LILRB4/TYROBP/PKN1/CRTAM/CD300A/PTPN6/PRKAR1A 28

BP GO:0046718 viral entry into host cell 40/2416 140/18862 5.41623220266956e-07 1.12085916416356e-05 7.80958919573517e-06 CD55/IFITM3/IFITM2/ITGA5/IFITM1/HLA-DRB1/TRIM22/ANPEP/HAVCR1/BSG/ICAM1/CD74/SLC20A2/CD86/CLDN1/CR1/CD80/CIITA/SLC10A1/CAV1/FCN1/SLAMF1/HYAL2/CXCR4/P4HB/SELPLG/CLEC5A/LGALS1/EPHA2/FCN3/LY6E/ITGAV/ITGA2/CCR5/CAV2/CR2/SERPINB3/CXADR/TMPRSS4/HYAL1 40

BP GO:0001933 negative regulation of protein phosphorylation 80/2416 362/18862 5.4550432020342e-07 1.12498468803197e-05 7.83833379421778e-06 IRAK3/ENPP1/INPP5J/DUSP4/THY1/PBLD/CNKSR3/LYN/DNAJC10/IL1B/PMEPA1/GREM1/RGS2/TRIB2/ZC3H12A/PPARGC1A/PKIB/SH3BP5/CDKN2B/LAX1/SOCS3/TWIST1/SOCS1/CTDSPL/UBASH3B/SIRPA/PTPRC/CAMK2N1/DNAJA1/DDIT4/HEG1/PDCD4/PKIA/ITPRIP/DGKQ/GMFG/AGT/CEBPA/DUSP14/DUSP21/CAV1/SEMA4D/PRR5L/GPD1L/HYAL2/BMP7/SAMSN1/CBLC/RASIP1/WWTR1/HGF/DUSP10/PTK6/RGS4/LRRK2/LILRB4/RASSF2/DUSP22/HHEX/PKN1/OCLN/CD300A/SH3GL2/PARP14/SMAD7/ENG/MYADM/PTPN6/PPP1R1B/PRKAR2B/TNFAIP3/IFNG/SERPINB3/FABP4/SH2B3/XDH/PRKAR1A/SFRP2/ERRFI1/DKK1 80

BP GO:0051384 response to glucocorticoid 39/2416 135/18862 5.47774669314671e-07 1.12577138935015e-05 7.8438151377364e-06 TAT/HSD3B2/PCK2/ANXA1/IGFBP7/ADM/ICAM1/PCK1/PTAFR/PAM/SPARC/CFLAR/ALAD/DDIT4/CLDN1/EDN1/HNMT/IL1RN/ASS1/SERPINF1/FIBIN/STC1/FOSL1/ANXA3/GOT1/GJB2/SRD5A1/HSD11B2/TNF/FOS/ZFP36/IL6/ADAM9/AQP1/BCHE/ADCYAP1/FOSB/ERRFI1/CPS1 39

BP GO:0030258 lipid modification 64/2416 270/18862 5.82757881665252e-07 1.19355222499137e-05 8.31607828963436e-06 B4GALNT2/ACOX1/AMACR/PHYH/INPP5J/ACADS/CPT1A/ACOX2/ETFDH/ACOT8/ITPKA/MTMR11/ABCB11/PIK3R3/CPT2/IMPA2/SPHK2/PPARGC1A/CROT/IRS1/ACAT1/IP6K2/PPARG/ACAA1/SOCS3/TWIST1/ACAA2/SOCS1/BDH2/FABP3/CRAT/BPNT1/MLYCD/PECR/EHHADH/DECR2/HADH/DGKQ/APPL2/AGT/ECH1/OCRL/EPHX2/PLA2G7/PDK4/AUH/ACADM/HADHA/CYP3A4/ABCD3/NR4A3/MBOAT1/PIK3CD/TTC7B/PIP5K1B/FABP1/SPHK1/APOC1/ST3GAL4/SLC27A2/MTM1/ETFA/STARD4/APOD 64

BP GO:0035987 endodermal cell differentiation 19/2416 44/18862 5.91751440473355e-07 1.20571845248563e-05 8.40084651193186e-06 ITGA5/MMP9/EOMES/COL5A2/ITGB2/COL4A2/GATA6/LAMB1/SOX17/COL12A1/NANOG/MMP14/COL5A1/ITGAV/ITGA4/INHBA/FN1/COL7A1/DKK1 19

BP GO:1902106 negative regulation of leukocyte differentiation 32/2416 101/18862 5.92744138554178e-07 1.20571845248563e-05 8.40084651193186e-06 LYN/ANXA1/ZC3H12A/PIAS3/LILRB1/MIR21/IRF1/SOCS1/UBASH3B/HOXA7/CTLA4/LILRB3/FBN1/CD74/CR1/GPR137B/HMGB3/IHH/FCGR2B/NME1/LTF/RUNX3/LILRB4/BCL6/MAFB/SMAD7/NRARP/FBXW7/LAG3/INHBA/TLR4/DTX1 32

BP GO:0009991 response to extracellular stimulus 99/2416 477/18862 6.01585810644635e-07 1.21954130321157e-05 8.49715726098491e-06 SLC16A1/IFI16/VCAM1/PDK2/C2/HSPA5/NPY/CPT1A/LYN/MAP3K5/KYNU/CBS/PCK2/SIK1/ZC3H12A/PPARGC1A/CD40/SCTR/ADM/FADS1/MT3/SLC39A5/MMP7/NUCB2/CDKN2B/PPARG/ICAM1/NOD2/NR1H4/XBP1/PCK1/OTC/SPARC/PTPRC/TNC/HMGCL/ALAD/ACVR1C/CXCL10/SLC6A19/VDR/REG1A/SSTR1/AQP3/ASS1/APPL2/RARRES2/TRIM24/SORD/SLC10A1/ADA/STC1/BMP7/SLC39A4/FOSL1/UCP2/PDK4/ACSL4/COL1A1/FOXO4/SOD2/GNAI2/SLC25A25/LIPG/ALDH1A2/CHSY1/LRRK2/LPL/CYP27B1/SLC27A4/LTA/PMAIP1/SPP1/NR4A2/CPEB4/SGIP1/SRD5A1/ITGA4/HSD11B2/FOS/ITGA2/CD3E/DSC2/SIPA1/BCKDHB/GPT/ZFP36/CAT/BNIP3/ACSL1/AKR1C3/BCHE/ADCYAP1/PCSK1N/TNFRSF11B/SFRP2/SNAI2/ABCG5/CPS1 99

BP GO:0050864 regulation of B cell activation 50/2416 193/18862 6.15337461905155e-07 1.24319026201855e-05 8.6619314441243e-06 LYN/IGKC/CD40/GPR183/NOD2/IGHM/XBP1/LAPTM5/PTPRC/TNFSF13B/CTLA4/VAV3/CD74/SASH3/TRBC1/MNDA/SLAMF8/CD38/CR1/BTK/ADA/HMGB3/CD27/IGHG1/SAMSN1/CLCF1/FCGR2B/MAD2L2/NCKAP1L/BANK1/FCRL3/IL27RA/MIF/IGHV1-69/TYROBP/TNFSF13/CD19/PKN1/BCL6/MMP14/CD300A/TBC1D10C/PTPN6/CD22/INHBA/IL6/IGHD/TNFAIP3/TLR4/AHR 50

BP GO:0002709 regulation of T cell mediated immunity 27/2416 78/18862 6.25955736920354e-07 1.26037033515044e-05 8.78163364918492e-06 HLA-DRB1/IL1B/NOD2/LILRB1/PTPRC/MR1/IL7R/SASH3/HLA-DRA/TNFRSF1B/IL18R1/FZD5/IL12RB1/MALT1/FCGR2B/CD1C/IL1R1/LILRB4/WAS/IL23A/SMAD7/TRPM4/CD1D/IL6/CD1A/AZGP1/CD1B 27

BP GO:0072001 renal system development 67/2416 288/18862 6.60923600442455e-07 1.32629786486095e-05 9.24098388710078e-06 FGFR2/FREM2/MMP9/COL4A1/PECAM1/MAGI2/GREM1/SEC61A1/SULF1/CTSH/PLCE1/STAT1/AQP11/KCNJ8/ADAMTS1/TACSTD2/ANGPT2/FBN1/CFLAR/PDGFRB/CD34/OVOL1/BASP1/TEK/PBX1/HES5/MPST/MME/ASS1/AGT/PODXL/SERPINF1/PLXND1/HYAL2/BMP7/EGR1/SULF2/WWTR1/NID1/ALDH1A2/LRRK2/WFS1/DCN/HNF1B/SOX17/GPR4/CA2/SERPINB7/HPGD/AKR1B1/FGF2/SMAD7/PROM1/HOXB7/WNT5A/DCHS1/GCNT1/PKD2/LAMB2/WNK4/LIF/CAT/GLIS2/LRP4/FOXF1/LAMA5/OSR1 67

BP GO:0050851 antigen receptor-mediated signaling pathway 73/2416 323/18862 6.9391897966672e-07 1.38783795933344e-05 9.66976465837234e-06 BTN3A3/PSMB9/THY1/LYN/IGKC/HLA-DRB1/ZC3H12A/GBP1/NFKBIZ/LAX1/IGHM/FYN/LAPTM5/BTN3A1/PTPRC/CTLA4/CD79A/VAV3/TRBC1/HLA-DRA/MNDA/PDE4B/LCP2/CD38/PAG1/TRAC/RFTN1/BTN2A2/SH2D1A/RIPK2/BTK/ADA/ITK/KLHL6/IGHG1/BTN3A2/HHLA2/MALT1/LCK/PSMB8/FCGR2B/NCKAP1L/CCR7/FCRL3/CD3D/LILRB4/IGHV1-69/WAS/BTNL3/CD160/HLA-DPA1/PLCG2/PIK3CD/CD19/MS4A1/PRKCH/CD300A/CD3G/PRKCQ/HLA-DPB1/PTPN6/CD247/CD3E/CD22/SKAP1/IGHD/TRAT1/HLA-DQB1/PSMA8/PAX5/STAP1/BTNL8/HLA-DQA1 73

BP GO:0002224 toll-like receptor signaling pathway 43/2416 157/18862 7.39603418367592e-07 1.47425965667921e-05 1.02719080635809e-05 IRAK3/S100A8/CTSK/TNIP3/LYN/BIRC3/CD40/S100A9/HSP90B1/ITGB2/NOD2/NR1H4/IRF1/RFTN1/MAPKAPK2/APPL2/LRRC19/RIPK2/BTK/CAV1/CTSB/LY96/NMI/TLR2/PIK3AP1/FCRL3/LTF/TLR1/CD36/IRF4/LILRA2/CD300LF/CD300A/TLR8/CD14/NFKBIA/IFI35/TLR10/F2RL1/TNFAIP3/TRIL/GRAMD4/TLR4 43

BP GO:0070542 response to fatty acid 23/2416 61/18862 7.49479646980966e-07 1.48896623200219e-05 1.03743761661049e-05 CPT1A/ZC3H12A/PPARGC1A/IRS1/NR1H4/PTAFR/FABP3/HMGCL/ALAD/CLDN1/EDN1/SCD/ASS1/UCP2/PDK4/NME1/TLR2/CD36/LPL/CAT/ACSL1/AKR1C3/CPS1 23

BP GO:0071887 leukocyte apoptotic process 32/2416 102/18862 7.58577240659515e-07 1.50203334030921e-05 1.0465421277852e-05 LYN/HIF1A/IDO1/TRAF3IP2/ANXA1/HCLS1/NOD2/LILRB1/EFNA1/CD274/IL7R/SLC7A11/CD74/GIMAP8/PLEKHO2/IL2RA/ST3GAL1/BTK/ADA/DOCK8/CD27/CCL21/CCL19/CCR7/PIK3CD/PKN1/BCL6/CD3G/PRKCQ/WNT5A/IL6/CXCL12 32

BP GO:0048732 gland development 88/2416 413/18862 7.95868346239313e-07 1.57065408728023e-05 1.09435365141655e-05 FGFR2/PITX2/SERPINB5/CPT1A/TGM2/MSN/HOXA9/HIF1A/CCL11/PCK2/ANXA1/HOXA3/TWSG1/SULF1/LAMA1/OAS2/HOXA5/XBP1/ROBO1/PCK1/OTC/PAM/SLC9A3R1/CFLAR/CLCN2/TNC/HMGCL/CLDN1/REG1A/IGFBP5/PBX1/MPST/CEBPB/COBL/HNF4A/JAK2/ASS1/CEBPA/LEF1/SERPINF1/ADA/CAV1/PLXND1/BMP7/ETS1/UCP2/SULF2/IHH/HGF/NME1/ALDH1A2/EPHA2/GATA6/IRF6/HNF1B/APLN/CSF1R/ESRP2/TNFSF11/MAFB/SRD5A1/TNF/FBXW7/ITGA2/WNT5A/PTPN3/PKD2/NRG1/IL6/DDR1/TFCP2L1/TNFAIP3/STAT5A/HOXB9/NTN4/SOSTDC1/ADCYAP1/ELF3/ALDH1A3/FOXF1/XDH/MST1/FRZB/HOXB13/WNT2/LAMA5/TPH1/CPS1 88

BP GO:0052548 regulation of endopeptidase activity 90/2416 426/18862 8.79648275787081e-07 1.72605058242211e-05 1.20262620057493e-05 TIMP1/PI3/S100A8/COL6A3/IFI16/CASP1/SERPINB5/SERPINA1/PSMB9/MMP9/LYN/BCL2L10/MAP3K5/LAMP3/SERPINA3/SERPING1/BIRC3/C3/SPINK2/CTSH/SERPINB9/MT3/S100A9/TNFAIP8/CST7/PPARG/CD44/ROBO1/FYN/EFNA1/MIR21/AIM2/LAPTM5/FAM162A/VIL1/CFLAR/F3/ACVR1C/PLAUR/TNFRSF10B/TFPI/SERPINA6/JAK2/TIMP3/CR1/AGT/APH1B/RIPK2/STAT3/SERPINF1/VCP/CD27/MALT1/LCK/HERPUD1/SPINK5/PSMB8/HGF/CSTA/SLPI/CYCS/SERPINI1/LTF/SPOCK2/PAPLN/SERPINB7/NLRP7/SPINT1/CARD8/NLRP1/BST2/FABP1/SERPINH1/PMAIP1/TNF/TIMP2/SEMG1/SPINK4/SH3RF1/SERPINE1/SLC1A1/AQP1/KLF4/SERPINB3/GRAMD4/COL7A1/TFPI2/PCSK1N/XDH/SFRP2 90

BP GO:0051767 nitric-oxide synthase biosynthetic process 12/2416 20/18862 8.83297697380444e-07 1.72605058242211e-05 1.20262620057493e-05 NOD2/CCL2/IL33/EDN1/JAK2/NAMPT/KDR/TLR2/LRRK2/IFNG/TLR4/MAP2K6 12

BP GO:0051769 regulation of nitric-oxide synthase biosynthetic process 12/2416 20/18862 8.83297697380444e-07 1.72605058242211e-05 1.20262620057493e-05 NOD2/CCL2/IL33/EDN1/JAK2/NAMPT/KDR/TLR2/LRRK2/IFNG/TLR4/MAP2K6 12

BP GO:0072678 T cell migration 24/2416 66/18862 9.37289574379728e-07 1.8238415406642e-05 1.27076207663728e-05 MSN/GPR183/ICAM1/CCL2/CXCL10/CXCL11/CXCL13/CCL20/CCR6/ITGAL/DOCK8/CXCL16/CCL21/AIF1/IL27RA/S1PR1/PIK3CD/ITGA4/ECM1/WNT5A/S100A7/APOD/C10orf99/CXCL12 24

BP GO:0007031 peroxisome organization 28/2416 84/18862 9.39462001650855e-07 1.8238415406642e-05 1.27076207663728e-05 ACOX1/AMACR/PHYH/PEX19/ACOX2/ACOT8/PEX11A/PEX26/CROT/ACAA1/DAO/ACOT4/CRAT/MLYCD/HMGCL/PECR/EHHADH/DECR2/NOS2/ECH1/DDO/EPHX2/PEX11G/ABCD3/MAVS/RAB8B/SLC27A2/CAT 28

BP GO:0001655 urogenital system development 72/2416 320/18862 9.83996243994349e-07 1.90409662798906e-05 1.32667982999238e-05 FGFR2/SERPINB5/FREM2/MMP9/COL4A1/PECAM1/MAGI2/GREM1/ANXA1/SEC61A1/SULF1/CTSH/PLCE1/STAT1/AQP11/KCNJ8/ADAMTS1/TACSTD2/ANGPT2/FBN1/CFLAR/TNC/PDGFRB/CD34/OVOL1/BASP1/TEK/PBX1/HES5/MPST/MME/ASS1/AGT/PODXL/SERPINF1/PLXND1/HYAL2/BMP7/EGR1/SULF2/WWTR1/NID1/ALDH1A2/LRRK2/WFS1/DCN/HNF1B/SOX17/GPR4/CA2/SERPINB7/HPGD/AKR1B1/FGF2/SRD5A1/SMAD7/PROM1/HOXB7/WNT5A/DCHS1/GCNT1/PKD2/LAMB2/WNK4/LIF/CAT/GLIS2/LRP4/FOXF1/HOXB13/LAMA5/OSR1 72

BP GO:0042445 hormone metabolic process 54/2416 218/18862 1.02924567433094e-06 1.98362397777877e-05 1.38209053202707e-05 DUOX2/DUOXA2/BACE2/CTSK/HSD3B2/SDR16C5/DHRS11/HIF1A/HSD17B2/DUOXA1/RDH5/PPARGC1A/ADM/ADH6/RETSAT/CLCN2/SULT1A1/MME/DGKQ/SRD5A3/SLC16A2/UGT2B15/DDO/ADH1C/HSD17B3/EGR1/DIO3/IYD/HSD17B11/FDX1/ALDH1A2/PCSK1/CYP3A4/BMP5/AKR1B10/CYP27B1/AKR1B1/HSD17B8/TTR/SPP1/SRD5A1/SULT1B1/GHR/CYP27C1/KLK6/CPA3/CYP2S1/AKR1C3/UGT2B17/PCSK1N/ALDH1A3/CYP2C9/ALDH1A1/CRYM 54

BP GO:0032642 regulation of chemokine production 29/2416 89/18862 1.03175072669701e-06 1.98362397777877e-05 1.38209053202707e-05 HIF1A/IL1B/CXCL6/NOD2/NR1H4/TWIST1/SIRPA/IL33/CD74/RIPK2/EGR1/TLR2/AIF1/EPHA2/LILRB4/CSF1R/MAVS/LPL/MCOLN2/TNF/WNT5A/IL6/F2RL1/KLF4/IFNG/ADCYAP1/TLR4/APOD/SNAI2 29

BP GO:0001822 kidney development 65/2416 280/18862 1.04426771008647e-06 2.00123329650011e-05 1.39435982951129e-05 FGFR2/FREM2/MMP9/PECAM1/MAGI2/GREM1/SEC61A1/SULF1/CTSH/PLCE1/STAT1/AQP11/KCNJ8/ADAMTS1/TACSTD2/ANGPT2/FBN1/CFLAR/PDGFRB/CD34/OVOL1/BASP1/TEK/PBX1/HES5/MPST/MME/ASS1/AGT/PODXL/SERPINF1/PLXND1/HYAL2/BMP7/EGR1/SULF2/WWTR1/NID1/ALDH1A2/LRRK2/WFS1/DCN/HNF1B/SOX17/GPR4/CA2/SERPINB7/HPGD/AKR1B1/FGF2/SMAD7/PROM1/HOXB7/WNT5A/DCHS1/GCNT1/PKD2/LAMB2/WNK4/LIF/CAT/GLIS2/LRP4/LAMA5/OSR1 65

BP GO:0042742 defense response to bacterium 76/2416 344/18862 1.05140367193899e-06 2.00845060408859e-05 1.3993884904856e-05 LCN2/PI3/S100A8/PLA2G2A/DEFB1/IGKC/FGR/CFP/SELP/DEFB4A/DMBT1/S100A9/CXCL6/NOD2/IGHM/NR1H4/MR1/IL7R/SYT11/TRBC1/GBP2/SLAMF8/CXCL13/CCL20/KLK3/CEBPB/LEAP2/GBP4/TNFSF8/RARRES2/NOS2/RIPK2/DEFA6/S100A12/FCER1G/IGHG1/SPINK5/DEFA5/SLPI/ANXA3/IGKV3-20/TLR2/IL27RA/EPHA2/LTF/RNASE6/IGHV1-69/CD36/IL23A/MAVS/CD160/GNLY/MPEG1/NLRP1/LTA/ADAMTS5/ISG15/TNF/C5AR1/SEMG1/IL6/SERPINE1/S100A7/IGHD/F2RL1/AQP1/IRF8/TLR4/ZG16/KRT6A/LYZ/PPBP/C10orf99/FPR2/KLK7/CHGA 76

BP GO:0072330 monocarboxylic acid biosynthetic process 55/2416 224/18862 1.10495318300624e-06 2.10400031013329e-05 1.46596277348566e-05 OSBPL1A/LIPC/AMACR/EDN2/ACOX2/ACOT8/IDO1/ABCB11/IL1B/TBXAS1/ANXA1/OSBPL3/FADS1/CH25H/DEGS1/NR1H4/XBP1/LPGAT1/ACOT4/MLYCD/CD74/PECR/DECR2/CYP27A1/EDN1/ACSS2/SCD/KMO/PTGDS/PTGES/EPHX2/PDK4/GSTM4/SCAP/LIPG/ALDH1A2/CYP3A4/ABCD3/MIF/ABHD3/PTGS2/LPL/MGLL/HPGD/HPGDS/HSD17B8/FADS3/APOC1/SLC27A2/APOC2/AKR1C3/ACSM3/STARD4/ALDH1A3/CYP2C9 55

BP GO:2000106 regulation of leukocyte apoptotic process 27/2416 80/18862 1.108609199413e-06 2.10423911735716e-05 1.46612916248216e-05 LYN/HIF1A/IDO1/ANXA1/HCLS1/NOD2/LILRB1/EFNA1/CD274/IL7R/SLC7A11/CD74/GIMAP8/ST3GAL1/BTK/ADA/DOCK8/CD27/CCL21/CCL19/CCR7/PIK3CD/BCL6/CD3G/PRKCQ/WNT5A/CXCL12 27

BP GO:0031663 lipopolysaccharide-mediated signaling pathway 22/2416 58/18862 1.15350855711794e-06 2.18251142870569e-05 1.52066541615046e-05 CD55/LYN/IL1B/CX3CL1/CCL2/PTAFR/RIPK2/CD180/LY96/MALT1/TLR2/LTF/CD36/HCK/CARD8/LILRA2/CD14/TNF/NFKBIA/TNFAIP3/TLR4/LY86 22

BP GO:0030199 collagen fibril organization 21/2416 54/18862 1.24653724689994e-06 2.35106392136824e-05 1.63810441006671e-05 LUM/GREM1/COL1A2/COL5A2/LOXL1/COL3A1/ADAMTS3/EFEMP2/PXDN/DDR2/COL1A1/COL14A1/AEBP1/FMOD/COL12A1/COL5A3/SERPINH1/FKBP10/COL5A1/SFRP2/DPT 21

BP GO:0050679 positive regulation of epithelial cell proliferation 51/2416 203/18862 1.29584665619888e-06 2.43635522742756e-05 1.69753115015926e-05 SEMA5A/CDH3/FGFR2/MMP12/HIF1A/CCL11/LAMC1/NOD2/TGFA/XBP1/VEGFC/MIR21/TWIST1/CFLAR/F3/APLNR/CLDN1/HTRA1/TEK/REG1A/PPP1R16B/REG3A/EGR3/KDR/AREG/IHH/NME1/FGF9/NR4A3/APLN/LAMB1/BMP5/ESRP2/PIK3CD/FGF2/LRG1/NRARP/ITGA4/C5AR1/ECM1/WNT5A/TNFAIP3/STAT5A/CAV2/TLR4/HYAL1/MST1/CCR3/WNT2/CXCL12/OSR1 51

BP GO:0010038 response to metal ion 77/2416 352/18862 1.34108201920682e-06 2.51347447624926e-05 1.75126400720652e-05 TAT/S100A8/VCAM1/HSPA5/MMP9/HIF1A/ANK3/PPARGC1A/NDRG1/MT3/BSG/SLC41A1/ICAM1/SLC30A10/CHP2/SLC25A23/OTC/AQP9/PAM/SPARC/MT1G/SYT11/ALAD/HPCA/CLDN1/MT1F/JUNB/EDN1/MT1M/AQP3/SYT17/ASS1/TFF1/CALR/EEF2K/CEBPA/PTGES/SORD/SERPINF1/FIBIN/CAV1/HOMER1/MT1E/SOD2/NEDD4L/GOT1/LRRK2/IL1A/CA2/MT1X/CLIC4/CPNE2/MT2A/P2RX4/CD14/FOS/WNT5A/HVCN1/PKD2/CPNE5/RASGRP2/CAT/ADAM9/BNIP3/AQP1/ENDOG/SLC30A1/AKR1C3/FABP4/SOD3/SYT13/GGH/FOSB/TNFRSF11B/TCIRG1/ALOX5AP/CPS1 77

BP GO:0008202 steroid metabolic process 73/2416 329/18862 1.43982509816105e-06 2.69008074766139e-05 1.87431447360017e-05 OSBPL1A/VLDLR/AMACR/CYP2B6/HMGCS2/HSD3B2/APOL1/ACOX2/ACOT8/DHRS11/ABCB11/HSD17B2/IGFBP7/RDH5/PPARGC1A/OSBPL3/ADM/ACAT1/MT3/SDR42E1/SULT1A2/CH25H/NR1H4/ACAA1/ACAA2/CLCN2/SULT1A1/APOL2/VDR/CYP27A1/NR5A2/PBX1/UGT2B28/SERPINA6/DGKQ/SCD/AGT/STS/CEBPA/SRD5A3/UGT2B15/NR1I2/FMO5/EPHX2/HSD17B3/EGR1/HSD17B11/FDX1/SCAP/HSD11B1/CYP3A4/BMP5/CYP27B1/CETP/AKR1B1/HSD17B8/SPP1/CYB5R2/SRD5A1/HSD11B2/APOC1/TNF/HINT2/SULT1B1/SLC27A2/HMGCR/CAT/IFNG/AKR1C3/UGT2B17/STARD4/CYP2C9/SNAI2 73

BP GO:2000401 regulation of lymphocyte migration 23/2416 63/18862 1.45133048239034e-06 2.70244505845363e-05 1.88292931042027e-05 MSN/PADI2/CCL2/CXCL10/CXCL13/CCL20/CCR6/CCL4/DOCK8/MADCAM1/CCL21/AIF1/IL27RA/STK10/WASL/ITGA4/ECM1/WNT5A/JAM2/S100A7/APOD/C10orf99/CXCL12 23

BP GO:0043123 positive regulation of I-kappaB kinase/NF-kappaB signaling 47/2416 182/18862 1.45551151638191e-06 2.70244505845363e-05 1.88292931042027e-05 SHISA5/CASP1/TGM2/APOL3/HLA-DRB1/TRAF3IP2/BIRC3/TRIM22/CD40/CX3CL1/PIM2/NOD2/FYN/GJA1/CFLAR/CD74/PLK2/SLC20A1/TNFRSF10B/UNC5CL/S100A4/PINK1/RIPK2/GOLT1B/S100A12/MALT1/CCL21/PELI2/CCL19/S100B/CCR7/LGALS1/LTF/CD36/MAVS/BST2/TNFSF11/CTH/DDX21/TNF/ECM1/FLNA/TSPAN6/NDFIP2/F2RL1/TLR4/SECTM1 47

BP GO:0044272 sulfur compound biosynthetic process 49/2416 193/18862 1.49824020146786e-06 2.77314024867964e-05 1.9321862029391e-05 PDK2/CHST2/LUM/CBS/SLC26A2/CHST3/ACAT1/BGN/CHST11/MIR21/TPK1/PDHA1/MLYCD/SLC7A11/PPT1/CSGALNACT2/ACSS2/UGDH/MPST/CHST15/SCD/ST3GAL1/SLC35D2/OPLAH/CHAC1/PDK4/GSTM4/ACSL4/PAPSS2/CHSY1/DCN/FMOD/PDP1/CSGALNACT1/VCAN/PAPSS1/HPGDS/HSD17B8/CTH/CHSY3/GGT5/GSTA1/GGT6/ST3GAL4/PDK1/ACSL1/GSTO2/MGST1/GSTT1 49

BP GO:0043574 peroxisomal transport 25/2416 72/18862 1.51263030339177e-06 2.78560230155691e-05 1.94086914158284e-05 ACOX1/AMACR/PHYH/PEX19/ACOX2/ACOT8/PEX26/CROT/ACAA1/DAO/ACOT4/CRAT/MLYCD/HMGCL/PECR/EHHADH/DECR2/NOS2/ECH1/DDO/EPHX2/ABCD3/RAB8B/SLC27A2/CAT 25

BP GO:0050852 T cell receptor signaling pathway 51/2416 204/18862 1.51582183511839e-06 2.78560230155691e-05 1.94086914158284e-05 BTN3A3/PSMB9/THY1/HLA-DRB1/ZC3H12A/GBP1/NFKBIZ/FYN/LAPTM5/BTN3A1/PTPRC/CTLA4/TRBC1/HLA-DRA/PDE4B/LCP2/PAG1/TRAC/RFTN1/BTN2A2/SH2D1A/RIPK2/ADA/ITK/BTN3A2/HHLA2/MALT1/LCK/PSMB8/CCR7/CD3D/LILRB4/WAS/BTNL3/CD160/HLA-DPA1/PLCG2/PIK3CD/CD300A/CD3G/PRKCQ/HLA-DPB1/PTPN6/CD247/CD3E/SKAP1/TRAT1/HLA-DQB1/PSMA8/BTNL8/HLA-DQA1 51

BP GO:0002407 dendritic cell chemotaxis 13/2416 24/18862 1.52366837299925e-06 2.78560230155691e-05 1.94086914158284e-05 GPR183/SLAMF8/CCR6/CALR/CXCR2/CXCR4/CCL21/CCL19/CCR7/CCR1/CXCR1/TRPM4/CCR5 13

BP GO:0032528 microvillus organization 13/2416 24/18862 1.52366837299925e-06 2.78560230155691e-05 1.94086914158284e-05 PLD1/ESPN/VIL1/FSCN1/SLC9A3R1/FXYD5/PODXL/TNIK/CDHR5/RAP1GAP/MYO1A/USH1C/CDHR2 13

BP GO:0040013 negative regulation of locomotion 81/2416 377/18862 1.53058540825128e-06 2.78969083583414e-05 1.94371782892365e-05 TIMP1/SEMA5A/THY1/PBLD/IFITM1/MAGI2/GREM1/SULF1/PPARGC1A/PADI2/CX3CL1/PPARG/ADAMTS9/ARHGDIB/CCL2/ROBO1/GJA1/MIR21/TACSTD2/ANGPT2/IL33/HOXA7/SEMA4A/SLC9A3R1/ACVR1C/CD74/MARVELD3/OSBPL8/IGFBP5/COL3A1/SLAMF8/CXCL13/MMRN2/TIE1/APOH/CALR/DPYSL3/SERPINF1/SEMA6A/ADA/STC1/SEMA4D/MMP28/HYAL2/SEMA3E/PTPRM/CCL21/MEOX2/PTPRR/DUSP10/IL24/AIF1/IL27RA/WASL/DCN/MIF/WAS/BMP5/MCC/DUSP22/CLIC4/FGF2/BST2/CD300A/SMAD7/ENG/TNF/EVL/SEMA6D/WNT5A/SEMG1/SERPINE1/MIR214/KLF4/APOD/PFN2/ADORA3/MCTP1/STAP1/SFRP2/CXCL12 81

BP GO:1903707 negative regulation of hemopoiesis 32/2416 105/18862 1.54919249894633e-06 2.80824105684495e-05 1.95664270032733e-05 LYN/ANXA1/ZC3H12A/PIAS3/LILRB1/MIR21/IRF1/SOCS1/UBASH3B/HOXA7/CTLA4/LILRB3/FBN1/CD74/CR1/GPR137B/HMGB3/IHH/FCGR2B/NME1/LTF/RUNX3/LILRB4/BCL6/MAFB/SMAD7/NRARP/FBXW7/LAG3/INHBA/TLR4/DTX1 32

BP GO:0007565 female pregnancy 46/2416 177/18862 1.55018675788924e-06 2.80824105684495e-05 1.95664270032733e-05 TIMP1/ITGA5/MMP9/IDO1/IL1B/RGS2/RAMP2/IGFBP7/ADM/BSG/MAGED2/MMP7/ARHGDIB/GJA1/MIR21/ANGPT2/PAM/ACVR1C/THBD/APOL2/VDR/IGFBP5/CD38/JUNB/CALR/STS/STC1/PNOC/ETS1/FOSL1/UCP2/ACSL4/IHH/CYP27B1/HPGD/AKR1B1/GJB2/SPP1/HSD11B2/FOS/ITGA2/LIF/DDR1/ADCYAP1/FOSB/PTHLH 46

BP GO:0006979 response to oxidative stress 92/2416 444/18862 1.60446168215709e-06 2.89775503807765e-05 2.01901159046562e-05 DUOX2/TAT/MMP3/GPX8/VNN1/PDK2/RBPMS/PRDX4/MMP9/ACOX2/ETFDH/SGK2/MAP3K5/HIF1A/PDE8A/ANXA1/ZC3H12A/PPARGC1A/NCF2/MT3/PRDX6/FYN/MIR21/SIRPA/CFLAR/PDGFRB/SLC7A11/ALAD/MICB/CD38/EDN1/JAK2/PINK1/BTK/ADA/NCF4/PRR5L/HYAL2/BMP7/ETS1/FOSL1/GPX7/UCP2/PXDN/P4HB/FUT8/ERMP1/MB/COL1A1/SOD2/HGF/SCARA3/CCL19/CYCS/CCR7/AIF1/LRRK2/NR4A3/CD36/FBLN5/PTGS2/GJB2/MMP14/FABP1/NR4A2/SPHK1/FBXW7/IPCEF1/FOS/PKD2/IL6/S100A7/CAT/ADAM9/PDK1/IL18RAP/TNFAIP3/SLC1A1/NET1/BNIP3/AQP1/KLF4/ENDOG/AKR1C3/GPX2/SOD3/TLR4/APOD/MGST1/MCTP1/H19/HYAL1 92

BP GO:0045428 regulation of nitric oxide biosynthetic process 22/2416 59/18862 1.61798683448973e-06 2.91025423791934e-05 2.02772041126666e-05 IL1B/ZC3H12A/DDAH2/ICAM1/ITGB2/SIRPA/INSR/CD34/EDN1/JAK2/ASS1/CAV1/CLU/CD36/PTGS2/P2RX4/TNF/PKD2/KLF4/IFNG/TLR4/HSP90AB1 22

BP GO:0030336 negative regulation of cell migration 73/2416 330/18862 1.62114833387453e-06 2.91025423791934e-05 2.02772041126666e-05 TIMP1/THY1/PBLD/IFITM1/MAGI2/GREM1/SULF1/PPARGC1A/PADI2/CX3CL1/PPARG/ADAMTS9/ARHGDIB/CCL2/ROBO1/GJA1/MIR21/TACSTD2/ANGPT2/IL33/HOXA7/SLC9A3R1/ACVR1C/CD74/MARVELD3/OSBPL8/IGFBP5/COL3A1/SLAMF8/CXCL13/MMRN2/TIE1/APOH/CALR/DPYSL3/SERPINF1/ADA/STC1/MMP28/HYAL2/PTPRM/CCL21/MEOX2/PTPRR/DUSP10/IL24/AIF1/IL27RA/WASL/DCN/MIF/BMP5/MCC/DUSP22/CLIC4/FGF2/BST2/CD300A/SMAD7/ENG/TNF/EVL/SEMA6D/SERPINE1/MIR214/KLF4/APOD/PFN2/ADORA3/MCTP1/STAP1/SFRP2/CXCL12 73

BP GO:0046209 nitric oxide metabolic process 26/2416 77/18862 1.72501516836791e-06 3.0874145355774e-05 2.15115689559393e-05 IL1B/ZC3H12A/DDAH2/ICAM1/ITGB2/SIRPA/INSR/CD34/EDN1/JAK2/ASS1/NOS2/CAV1/CLU/TLR2/SPR/CD36/PTGS2/P2RX4/TNF/PKD2/KLF4/IFNG/TLR4/HSP90AB1/CPS1 26

BP GO:0006625 protein targeting to peroxisome 24/2416 68/18862 1.74500208756516e-06 3.09530132199058e-05 2.15665201611671e-05 ACOX1/AMACR/PHYH/PEX19/ACOX2/ACOT8/PEX26/CROT/ACAA1/DAO/ACOT4/CRAT/MLYCD/HMGCL/PECR/EHHADH/DECR2/NOS2/ECH1/DDO/EPHX2/RAB8B/SLC27A2/CAT 24

BP GO:0072662 protein localization to peroxisome 24/2416 68/18862 1.74500208756516e-06 3.09530132199058e-05 2.15665201611671e-05 ACOX1/AMACR/PHYH/PEX19/ACOX2/ACOT8/PEX26/CROT/ACAA1/DAO/ACOT4/CRAT/MLYCD/HMGCL/PECR/EHHADH/DECR2/NOS2/ECH1/DDO/EPHX2/RAB8B/SLC27A2/CAT 24

BP GO:0072663 establishment of protein localization to peroxisome 24/2416 68/18862 1.74500208756516e-06 3.09530132199058e-05 2.15665201611671e-05 ACOX1/AMACR/PHYH/PEX19/ACOX2/ACOT8/PEX26/CROT/ACAA1/DAO/ACOT4/CRAT/MLYCD/HMGCL/PECR/EHHADH/DECR2/NOS2/ECH1/DDO/EPHX2/RAB8B/SLC27A2/CAT 24

BP GO:0051235 maintenance of location 71/2416 319/18862 1.7735388579441e-06 3.13658504253615e-05 2.18541645934389e-05 LCN2/S100A8/ENPP1/HSPA5/CXCL9/ABHD5/CPT1A/THY1/LYN/KDELR3/SRI/CHCHD10/IL1B/C3/ANK3/ZC3H12A/S100A9/CX3CL1/TMEM38B/PPARG/HSP90B1/GJA1/SLC25A23/UBASH3B/PTPRC/FBN1/ACVR1C/VSTM2A/APLNR/CXCL10/CXCL11/OSBPL8/SCIN/VPS13A/CORO1A/CALR/DZIP1/PINK1/TRPV1/CLIC2/CAV1/ITPR1/LCK/CCL21/CCL19/CCR7/DBN1/TMEM38A/NFKBIE/MEST/CD36/SRGN/PLCG2/LPL/CD19/FGF2/MCOLN2/ITGAV/TNF/FBXW7/PTPN6/NFKBIA/FLNA/PKD2/IL6/S100A7/NRIP1/CCR5/CDS1/DHRS7C/STARD4 71

BP GO:0048661 positive regulation of smooth muscle cell proliferation 30/2416 96/18862 1.82266342598439e-06 3.21392722451686e-05 2.23930464512876e-05 FGFR2/TGM2/MMP9/MAP3K5/PPARGC1A/STAT1/CX3CL1/ADAMTS1/GJA1/MIR21/PTAFR/PDGFRB/NQO2/IGFBP5/EDN1/HES5/JAK2/GNAI2/FGF9/AIF1/S1PR1/NR4A3/HPGD/AKR1B1/FGF2/TNF/ITGA2/CALCRL/IL6/MIR214 30

BP GO:0060099 regulation of phagocytosis, engulfment 10/2416 15/18862 1.89843236883646e-06 3.33765690804286e-05 2.32551333490446e-05 RAB31/C3/PPARG/APPL2/NCKAP1L/CD36/CD300A/ITGA2/F2RL1/STAP1 10

BP GO:0022612 gland morphogenesis 33/2416 111/18862 1.97984295403229e-06 3.47054823706838e-05 2.4181054036091e-05 FGFR2/SERPINB5/TGM2/MSN/CCL11/TWSG1/SULF1/LAMA1/XBP1/SLC9A3R1/CFLAR/TNC/IGFBP5/CEBPB/CAV1/PLXND1/BMP7/SULF2/HGF/EPHA2/CSF1R/ESRP2/TNF/FBXW7/WNT5A/IL6/DDR1/TNFAIP3/NTN4/SOSTDC1/ELF3/HOXB13/LAMA5 33

BP GO:0003018 vascular process in circulatory system 58/2416 245/18862 2.01913141588705e-06 3.52903907292869e-05 2.45885890899041e-05 SLC16A1/ABCB1/ABCG2/C2CD4A/SLC22A5/EDN2/RGS2/RAMP2/FERMT2/SLC7A5/ADM/ICAM1/KCNJ8/SLC6A20/GJA1/MIR21/PTAFR/ATP8A1/INSR/ARHGAP42/SLC9A3R1/C2CD4B/TEK/CDH5/CD38/SLC2A3/EDN1/P2RY1/SLC44A1/SLC24A3/SLC6A6/EDN3/AGT/SLC16A2/CAV1/EDNRA/SLC4A4/ABCC1/SOD2/SLC1A3/SLC1A4/APLN/CD36/GPR4/SLC27A4/OCLN/ABCC3/SLC5A1/SH3GL2/ADCY6/TRPM4/TJP3/F2RL1/SMTNL2/SLC1A1/SLC15A2/SCNN1B/CPS1 58

BP GO:0034142 toll-like receptor 4 signaling pathway 18/2416 43/18862 2.02807883345709e-06 3.53431282087844e-05 2.46253339427154e-05 TNIP3/LYN/ITGB2/NR1H4/APPL2/RIPK2/LY96/NMI/PIK3AP1/LTF/LILRA2/CD14/NFKBIA/IFI35/F2RL1/TNFAIP3/TRIL/TLR4 18

BP GO:0007369 gastrulation 46/2416 179/18862 2.16642229400532e-06 3.76439558958359e-05 2.62284362432131e-05 NAT8B/FGFR2/DUSP4/ITGA5/MMP9/TWSG1/EOMES/EPB41L5/ACVR2A/COL5A2/ITGB2/EYA2/GJA1/APLNR/UGDH/TGIF2/IL1RN/HNF4A/LEF1/BMP7/COL4A2/EPHA2/GATA6/NR4A3/APLN/LAMB1/SOX17/COL12A1/NANOG/MMP14/COL5A1/ITGAV/ITGA4/MYADM/ITGA2/WNT5A/INHBA/FN1/KIF16B/KLF4/COL7A1/FOXF1/PRKAR1A/SFRP2/DKK1/OSR1 46

BP GO:0032615 interleukin-12 production 22/2416 60/18862 2.24733184263548e-06 3.88234718321955e-05 2.70502642843538e-05 IRAK3/IDO1/CD40/NOD2/LILRB1/MAST2/MIR21/LAPTM5/IRF1/TIGIT/RIPK2/SLAMF1/TLR2/CCL19/CCR7/CD36/IL23A/TLR8/LTB/IFNG/IRF8/TLR4 22

BP GO:0032655 regulation of interleukin-12 production 22/2416 60/18862 2.24733184263548e-06 3.88234718321955e-05 2.70502642843538e-05 IRAK3/IDO1/CD40/NOD2/LILRB1/MAST2/MIR21/LAPTM5/IRF1/TIGIT/RIPK2/SLAMF1/TLR2/CCL19/CCR7/CD36/IL23A/TLR8/LTB/IFNG/IRF8/TLR4 22

BP GO:2001057 reactive nitrogen species metabolic process 26/2416 78/18862 2.27454488409167e-06 3.91800217028508e-05 2.72986905011915e-05 IL1B/ZC3H12A/DDAH2/ICAM1/ITGB2/SIRPA/INSR/CD34/EDN1/JAK2/ASS1/NOS2/CAV1/CLU/TLR2/SPR/CD36/PTGS2/P2RX4/TNF/PKD2/KLF4/IFNG/TLR4/HSP90AB1/CPS1 26

BP GO:2000146 negative regulation of cell motility 75/2416 345/18862 2.33856500640598e-06 4.01667073146387e-05 2.79861639626015e-05 TIMP1/THY1/PBLD/IFITM1/MAGI2/GREM1/SULF1/PPARGC1A/PADI2/CX3CL1/PPARG/ADAMTS9/ARHGDIB/CCL2/ROBO1/GJA1/MIR21/TACSTD2/ANGPT2/IL33/HOXA7/SLC9A3R1/ACVR1C/CD74/MARVELD3/OSBPL8/IGFBP5/COL3A1/SLAMF8/CXCL13/MMRN2/TIE1/APOH/CALR/DPYSL3/SERPINF1/ADA/STC1/MMP28/HYAL2/PTPRM/CCL21/MEOX2/PTPRR/DUSP10/IL24/AIF1/IL27RA/WASL/DCN/MIF/WAS/BMP5/MCC/DUSP22/CLIC4/FGF2/BST2/CD300A/SMAD7/ENG/TNF/EVL/SEMA6D/SEMG1/SERPINE1/MIR214/KLF4/APOD/PFN2/ADORA3/MCTP1/STAP1/SFRP2/CXCL12 75

BP GO:0044409 entry into host 41/2416 153/18862 2.43731046632987e-06 4.1742443618753e-05 2.90840586499436e-05 CD55/IFITM3/IFITM2/ITGA5/IFITM1/HLA-DRB1/TRIM22/ANPEP/HAVCR1/BSG/ICAM1/CD74/SLC20A2/CD86/CLDN1/CR1/CD80/CIITA/SLC10A1/CAV1/FCN1/SLAMF1/HYAL2/CXCR4/P4HB/SELPLG/CLEC5A/LGALS1/EPHA2/FCN3/LY6E/ITGAV/ITGA2/CCR5/CAV2/CR2/SERPINB3/CXADR/KRT6A/TMPRSS4/HYAL1 41

BP GO:0030001 metal ion transport 98/2416 486/18862 2.61605584271065e-06 4.46753376004455e-05 3.1127553308682e-05 SLC39A2/CXCL9/THY1/CACNA2D4/KCND3/LYN/CNNM2/SRI/SEC61A1/TRPM6/RAMP2/SPHK2/LILRB2/SESTD1/MT3/SLC39A5/CX3CL1/SLC41A1/TMEM38B/ICAM1/CCL2/SLC30A10/LILRB1/FYN/GJA1/EHD3/SLC25A23/MIR21/TMEM37/UBASH3B/PTPRC/KCNK5/KCNE2/PDGFRB/APLNR/CXCL10/CXCL11/HPCA/SLC41A2/PDE4B/RAMP3/GEM/GJA4/CNNM4/SLC24A3/CORO1A/CCL4/AFG3L2/TRPV1/CLIC2/STC1/CAV1/NIPAL1/ITPR1/HOMER1/SLC4A4/SLC39A4/TMEM163/P2RX5/CXCR4/LCK/CCL21/GNAI2/SLC25A25/CCL19/CCR7/FCRL3/RGS4/TMEM38A/WFS1/PLCG2/CYP27B1/CD19/PANX1/MS4A1/FGF2/LILRA2/CCR1/MCOLN2/CYSLTR1/ITGAV/P2RX4/FAM155A/CACNA1D/TRPM4/PTPN6/KCNJ2/PKD2/CALCRL/SEMG1/NDFIP2/SLC30A1/CCR5/DHRS7C/CD33/GPR35/CXCL12/CLCA1 98

BP GO:0002886 regulation of myeloid leukocyte mediated immunity 20/2416 52/18862 2.72660110870262e-06 4.63757783530644e-05 3.23123358535569e-05 LYN/FGR/C3/SPHK2/CXCL6/ITGB2/PTAFR/RAC2/IL13RA2/BTK/STXBP1/FCGR2B/MAVS/TYROBP/CD300A/DDX21/F2RL1/STAP1/FOXF1/CD177 20

BP GO:0052126 movement in host environment 45/2416 175/18862 2.73119097347745e-06 4.63757783530644e-05 3.23123358535569e-05 CD55/IFITM3/IFITM2/ITGA5/IFITM1/HLA-DRB1/TRIM22/ANPEP/HAVCR1/BSG/ICAM1/CD74/SLC20A2/CD86/CLDN1/PPID/CR1/CD80/CIITA/VPS37B/SLC10A1/CAV1/FCN1/SLAMF1/HYAL2/CHMP4B/CXCR4/P4HB/SELPLG/CLEC5A/LGALS1/EPHA2/FCN3/LY6E/ITGAV/ITGA2/CCR5/CAV2/CR2/SERPINB3/CXADR/KRT6A/TMPRSS4/HYAL1/CHMP4C 45

BP GO:0002221 pattern recognition receptor signaling pathway 51/2416 208/18862 2.7932034821178e-06 4.72940135040401e-05 3.29521164382618e-05 IRAK3/S100A8/CTSK/TNIP3/RNF135/LYN/BIRC3/SEC14L1/CD40/S100A9/HSP90B1/ITGB2/NOD2/NR1H4/IRF1/RFTN1/MAPKAPK2/CLEC4E/SLC15A3/APPL2/LRRC19/RIPK2/BTK/CAV1/FCN1/CTSB/LY96/NMI/TLR2/PIK3AP1/FCRL3/LTF/TLR1/CD36/IRF4/LILRA2/CD300LF/CD300A/TLR8/CD14/NFKBIA/TSPAN6/IFI35/TLR10/F2RL1/TNFAIP3/TRIL/SLC15A2/GRAMD4/TLR4/MAP2K6 51

BP GO:0051591 response to cAMP 29/2416 93/18862 2.8260261759008e-06 4.77142096554355e-05 3.32448882180666e-05 DUOX2/AQP8/HSPA5/STAT1/BSG/PCK1/PTAFR/AQP9/SPARC/THBD/TEK/IGFBP5/DGKQ/ASS1/MMP19/EEF2K/SLC26A3/STC1/FOSL1/COL1A1/FDX1/NME1/SRD5A1/FOS/PKD2/AQP1/FOSB/AHR/CPS1 29

BP GO:0006692 prostanoid metabolic process 19/2416 48/18862 2.91108924304773e-06 4.88734982776464e-05 3.40526228727155e-05 ACOX1/PTGR1/EDN2/IL1B/TBXAS1/ANXA1/ZADH2/CD74/EDN1/CES2/PTGDS/PTGES/MIF/PTGS2/HPGD/HPGDS/GSTA1/CYP2S1/AKR1C3 19

BP GO:0006693 prostaglandin metabolic process 19/2416 48/18862 2.91108924304773e-06 4.88734982776464e-05 3.40526228727155e-05 ACOX1/PTGR1/EDN2/IL1B/TBXAS1/ANXA1/ZADH2/CD74/EDN1/CES2/PTGDS/PTGES/MIF/PTGS2/HPGD/HPGDS/GSTA1/CYP2S1/AKR1C3 19

BP GO:0050830 defense response to Gram-positive bacterium 30/2416 98/18862 2.935573447406e-06 4.90408753599922e-05 3.41692428991821e-05 PLA2G2A/DEFB1/FGR/DEFB4A/DMBT1/NOD2/MR1/IL7R/GBP2/GBP4/TNFSF8/RARRES2/RIPK2/DEFA6/DEFA5/TLR2/IL27RA/EPHA2/RNASE6/CD36/MPEG1/LTA/TNF/C5AR1/IL6/ZG16/KRT6A/LYZ/C10orf99/CHGA 30

BP GO:0002576 platelet degranulation 36/2416 128/18862 2.93751552072436e-06 4.90408753599922e-05 3.41692428991821e-05 TIMP1/MANF/SERPINA1/LYN/ANXA5/PECAM1/SERPINA3/SERPING1/SELP/MAGED2/VEGFC/SPARC/PF4/TIMP3/APOH/RARRES2/PLEK/STXBP1/CLU/VWF/HGF/F5/CD36/PCDH7/SRGN/ISLR/ENDOD1/CFD/ECM1/FLNA/FERMT3/FN1/SERPINE1/MMRN1/PPBP/F13A1 36

BP GO:0002312 B cell activation involved in immune response 26/2416 79/18862 2.98038569647206e-06 4.9516931504078e-05 3.45009351436926e-05 CD40/GPR183/XBP1/PTPRC/DOCK11/CCR6/CR1/ST3GAL1/ADA/CD180/CLCF1/FCGR2B/MAD2L2/POU2AF1/IL27RA/LGALS1/TNFSF13/PLCG2/CD19/BCL6/SWAP70/BATF/IL6/ITM2A/TLR4/GAPT 26

BP GO:0051051 negative regulation of transport 90/2416 438/18862 2.98264738422214e-06 4.9516931504078e-05 3.45009351436926e-05 PRKG2/PEA15/ENPP1/PIM3/MMP9/SRI/CYP4F2/IL1B/ANXA1/ANK3/RGS2/LILRB2/SESTD1/IRS1/DYSF/ERLEC1/ICAM1/LILRB1/GJA1/TWIST1/SIRPA/BAG3/SLC9A3R1/KCNE2/OAZ2/SYT11/ACVR1C/CD74/TNFRSF1B/GEM/KLF7/ERBB3/EDN1/P2RY1/PKIA/IL13RA2/CORO1A/UBE2J1/APPL2/HECW2/DERL3/CLIC2/ADA/STC1/CAV1/UCP2/FCGR2B/GNAI2/RHBDF2/TLR2/TIFAB/RGS4/NEDD4L/LRRK2/CD36/WDR54/PKDCC/BST2/CD300LF/CD300A/ITGAV/APOC1/TNF/PKD2/SEMG1/NRG1/NDFIP2/WNK4/ANO9/LIF/INHBA/HMGCR/APOC2/TRAT1/SLC30A1/GABRE/ADCYAP1/VSNL1/APOD/CD33/MCTP1/FOXF1/GPR35/OSM/IL11/TFF2/ABCG5/NMU/OSR1/CHGA 90

BP GO:0042476 odontogenesis 35/2416 123/18862 2.99920208128177e-06 4.96534566789982e-05 3.45960590954871e-05 FGFR2/PITX2/SNX10/COL1A2/ADM/BSG/TWIST1/PAM/TNC/CD34/HTRA1/CNNM4/EDN1/AQP3/CSF3R/LEF1/BMP7/FAM20A/COL1A1/RELT/ROGDI/LAMB1/CA2/ADAMTS5/TNFSF11/TUFT1/INHBA/SERPINE1/AQP1/SOSTDC1/LRP4/TNFRSF11B/TCIRG1/LAMA5/OSR1 35

BP GO:0080164 regulation of nitric oxide metabolic process 22/2416 61/18862 3.09227410685084e-06 5.10525032599197e-05 3.55708451713852e-05 IL1B/ZC3H12A/DDAH2/ICAM1/ITGB2/SIRPA/INSR/CD34/EDN1/JAK2/ASS1/CAV1/CLU/CD36/PTGS2/P2RX4/TNF/PKD2/KLF4/IFNG/TLR4/HSP90AB1 22

BP GO:0045216 cell-cell junction organization 51/2416 209/18862 3.24171221462455e-06 5.33718364617743e-05 3.71868411942246e-05 CDH3/CLDN2/GRHL1/PECAM1/IL1B/RAMP2/FERMT2/MPP7/TLN2/CLDN15/ESAM/NR1H4/GJA1/CADM1/FSCN1/CDH11/HEG1/CLDN1/MARVELD3/CDH5/GJA4/EPB41L3/FZD5/AGT/GJB1/CLDN8/RAB13/CAV1/GJC1/EPHA2/CLDN23/SDK1/CSF1R/OCLN/GJB2/PRKCH/SMAD7/TNF/TJP3/FLNA/DCHS1/UGT8/F2RL1/DSP/PLEKHA7/GRHL2/CXADR/CLDN7/MARVELD2/SNAI2/CD177 51

BP GO:0010043 response to zinc ion 21/2416 57/18862 3.47990573892541e-06 5.71356424352491e-05 3.98092740033659e-05 S100A8/VCAM1/MT3/SLC30A10/OTC/PAM/MT1G/ALAD/MT1F/MT1M/ASS1/MT1E/SOD2/CA2/MT1X/MT2A/P2RX4/HVCN1/SLC30A1/GGH/CPS1 21

BP GO:0036336 dendritic cell migration 14/2416 29/18862 3.62388457548765e-06 5.93361320601824e-05 4.13424657325008e-05 GPR183/SLAMF8/CCR6/CALR/CXCR2/DOCK8/CXCR4/CCL21/CCL19/CCR7/CCR1/CXCR1/TRPM4/CCR5 14

BP GO:0001818 negative regulation of cytokine production 78/2416 367/18862 3.65288311639774e-06 5.9647077736248e-05 4.15591172146765e-05 UBE2L6/IRAK3/CDH3/RNF135/IDO1/HLA-DRB1/ANXA1/TRIB2/TWSG1/ZC3H12A/GBP1/CX3CL1/NOD2/NR1H4/LILRB1/MIR21/TWIST1/LAPTM5/CD274/SIRPA/PTPRC/IL33/SYT11/CD34/PDCD4/TIGIT/BTN2A2/CR1/APPL2/LEF1/BTK/SLAMF1/CD83/NMI/FCGR2B/RNF128/HGF/NCKAP1L/CLEC4A/BANK1/LRRC32/CCR7/IL27RA/EPHA2/GATA6/LTF/LILRB4/IL23A/MAVS/TYROBP/SRGN/NLRP7/CARD8/BCL6/BST2/NLRC5/NLRC3/SMAD7/TLR8/ISG15/NDRG2/TNF/PTPN6/LAG3/INHBA/ZFP36/IL6/FN1/F2RL1/TNFAIP3/KLF4/IFNG/TLR4/APOD/CD33/IL1R2/HSP90AB1/ERRFI1 78

BP GO:0045446 endothelial cell differentiation 34/2416 119/18862 3.73879166217159e-06 6.07171615982089e-05 4.23046984289887e-05 PDPN/MSN/PECAM1/IL1B/TNMD/ICAM1/MIR21/FSTL1/COL15A1/HEG1/CLDN1/CDH5/PPP1R16B/TIE1/ZEB1/STC1/KDR/CXCR4/S1PR1/SOX17/COL18A1/CLIC4/ROBO4/S1PR3/APOLD1/ENG/TNF/HOXB5/MYADM/TJP3/NRG1/F2RL1/XDH/MARVELD2 34

BP GO:0120254 olefinic compound metabolic process 34/2416 119/18862 3.73879166217159e-06 6.07171615982089e-05 4.23046984289887e-05 ACOX1/CYP2B6/ACOT8/SDR16C5/CYP4F2/TBXAS1/PPARGC1A/ADM/FADS1/ACAA1/CYP4F12/CLCN2/DGKQ/PTGDS/PTGES/EPHX2/HSD17B3/EGR1/FAAH/ALDH1A2/CYP2J2/BMP5/PTGS2/MGLL/HPGDS/SRD5A1/GSTA1/CYP27C1/CYP2S1/EPHX1/ACSL1/AKR1C3/ALDH1A3/CYP2C9 34

BP GO:0001706 endoderm formation 20/2416 53/18862 3.85433105393943e-06 6.2254235993168e-05 4.33756554208844e-05 DUSP4/ITGA5/MMP9/EOMES/COL5A2/ITGB2/COL4A2/GATA6/LAMB1/SOX17/COL12A1/NANOG/MMP14/COL5A1/ITGAV/ITGA4/INHBA/FN1/COL7A1/DKK1 20

BP GO:0002720 positive regulation of cytokine production involved in immune response 20/2416 53/18862 3.85433105393943e-06 6.2254235993168e-05 4.33756554208844e-05 IL1B/SLC7A5/NOD2/LILRB1/LAPTM5/CD74/SASH3/IL18R1/FZD5/MALT1/IL1R1/NR4A3/CD36/MAVS/CD160/DDX21/WNT5A/IL6/F2RL1/TLR4 20

BP GO:0006163 purine nucleotide metabolic process 90/2416 441/18862 3.99352214684433e-06 6.42938483240321e-05 4.47967558527564e-05 ACSF2/SEC13/ENPP1/PDK2/HMGCS2/ACOT8/HIF1A/KYNU/PDE8A/PFKFB3/SLC26A2/ENTPD5/SPHK2/PDZD3/PPARGC1A/CROT/ACAT1/PGM2L1/SULT1A2/PGM1/GIMAP7/ACOT11/TDO2/PDHA1/PDE4C/ACOT4/INSR/BPNT1/MLYCD/HMGCL/AK3/SULT1A1/GUCA2B/PPT1/DDIT4/HPCA/PDE4B/ADCY3/AMPD1/ACSS2/PANK3/ACOT9/TPST2/SCD/SUCLG2/NOS2/PINK1/PANK1/PFKFB2/VCP/GUCA2A/ADA/SLC4A4/MAGI3/PDK4/ACSL4/TPST1/SLC2A6/FHIT/RHOQ/NME1/PAPSS2/OGDHL/EPHA2/LRRK2/PDP1/PAPSS1/FAR2/HSD17B8/PNP/ACOT13/GDA/GMPR/ADCY6/SULT1B1/GUCY2C/HMGCR/ADCY4/PDK1/NUP210/ENO2/IFNG/ACSL1/ALDOB/ACSM3/PDE9A/SULT1C2/H19/XDH/PTHLH 90

BP GO:0002923 regulation of humoral immune response mediated by circulating immunoglobulin 9/2416 13/18862 4.02375929947382e-06 6.42938483240321e-05 4.47967558527564e-05 C4BPB/NOD2/PTPRC/CR1/C4BPA/FCGR2B/LTA/TNF/PTPN6 9

BP GO:0060100 positive regulation of phagocytosis, engulfment 9/2416 13/18862 4.02375929947382e-06 6.42938483240321e-05 4.47967558527564e-05 RAB31/C3/PPARG/APPL2/NCKAP1L/CD36/ITGA2/F2RL1/STAP1 9

BP GO:1905155 positive regulation of membrane invagination 9/2416 13/18862 4.02375929947382e-06 6.42938483240321e-05 4.47967558527564e-05 RAB31/C3/PPARG/APPL2/NCKAP1L/CD36/ITGA2/F2RL1/STAP1 9

BP GO:0072521 purine-containing compound metabolic process 93/2416 460/18862 4.17574798879526e-06 6.65440053829405e-05 4.63645533796716e-05 ACSF2/SEC13/ENPP1/PDK2/HMGCS2/ACOT8/HIF1A/KYNU/PDE8A/PFKFB3/SLC26A2/ENTPD5/SPHK2/PDZD3/PPARGC1A/MACROD1/CROT/ACAT1/PGM2L1/SULT1A2/PGM1/GIMAP7/ACOT11/TDO2/PDHA1/PDE4C/ACOT4/INSR/BPNT1/MLYCD/HMGCL/AK3/SULT1A1/GUCA2B/PPT1/DDIT4/HPCA/PDE4B/ADCY3/AMPD1/ACSS2/PANK3/ACOT9/TPST2/SCD/SUCLG2/NOS2/PINK1/PANK1/PFKFB2/VCP/GUCA2A/ADA/SLC4A4/MAGI3/PDK4/ACSL4/TPST1/SLC2A6/FHIT/RHOQ/NME1/SHMT2/PAPSS2/OGDHL/EPHA2/LRRK2/PDP1/PAPSS1/FAR2/HSD17B8/PNP/ACOT13/TTR/GDA/GMPR/ADCY6/SULT1B1/GUCY2C/HMGCR/ADCY4/PDK1/NUP210/ENO2/IFNG/ACSL1/ALDOB/ACSM3/PDE9A/SULT1C2/H19/XDH/PTHLH 93

BP GO:0072538 T-helper 17 type immune response 15/2416 33/18862 4.19232283566699e-06 6.66299842682007e-05 4.64244591907544e-05 ZC3H12A/NFKBIZ/MIR21/SLAMF6/IL12RB1/STAT3/MALT1/IL27RA/IL23A/IRF4/BATF/PRKCQ/SMAD7/LY9/IL6 15

BP GO:0032613 interleukin-10 production 22/2416 62/18862 4.21673694322635e-06 6.68397664405028e-05 4.65706249748823e-05 IDO1/HLA-DRB1/TRIB2/NOD2/LILRB1/CD274/CD34/SASH3/TIGIT/STAT3/CD83/FCGR2B/HGF/TLR2/LILRB4/IL23A/TYROBP/IRF4/ISG15/IL6/F2RL1/TLR4 22

BP GO:0002698 negative regulation of immune effector process 35/2416 125/18862 4.47602145172544e-06 7.07615062394791e-05 4.93030982187822e-05 IRAK3/CD55/C4BPB/SERPING1/ANXA1/SEC14L1/ZC3H12A/SERPINB9/NOD2/LILRB1/PTPRC/IL33/IL7R/MICB/HTRA1/SLAMF8/IL2RA/IL13RA2/CR1/C4BPA/SPINK5/FCGR2B/DUSP10/FCRL3/LILRB4/BCL6/BST2/CD300A/SMAD7/ENPP3/TNF/PTPN6/TSPAN6/CD22/FOXF1 35

BP GO:0042088 T-helper 1 type immune response 17/2416 41/18862 4.55664126819334e-06 7.18454549164876e-05 5.0058339746652e-05 HLA-DRB1/IL1B/ANXA1/IL33/SEMA4A/IL18R1/IL12RB1/CD80/RIPK2/LEF1/CCL19/IL27RA/IL1R1/IL23A/TMEM98/EBI3/TLR4 17

BP GO:0006805 xenobiotic metabolic process 34/2416 120/18862 4.58197642628022e-06 7.20542994739581e-05 5.02038522473975e-05 CYP2B6/UGT1A6/CBR3/SULT1A2/CMBL/ACAA1/SULT1A1/NQO2/BPHL/UGT2B28/HNF4A/CES2/UGT2B15/NR1I2/S100A12/GSTM4/CYP3A4/CES3/CYP2J2/NAT2/GSTA1/SULT1B1/CYP2S1/EPHX1/ACSL1/GSTO2/PON3/AKR7A3/NAT1/MGST1/HSP90AB1/CYP2C9/AHR/FMO1 34

BP GO:0070555 response to interleukin-1 50/2416 206/18862 4.73624426981636e-06 7.42842522318567e-05 5.17575724222314e-05 IRAK3/CHI3L1/PSMB9/HIF1A/ZBP1/CCL11/IL1B/ANXA1/ZC3H12A/CD40/GBP1/CX3CL1/ICAM1/NOD2/CCL2/PCK1/MIR21/SIRPA/CCL18/GBP2/CCL20/CD38/TFPI/EDN1/CEBPB/HNMT/CCL22/IL1RN/CCL4/KMO/RIPK2/MAP3K8/HYAL2/ETS1/EGR1/PSMB8/CCL21/PELI2/CCL19/IL1R1/IL1A/CCL13/NLRP7/NFKBIA/ADAMTS12/SELE/IL6/PSMA8/IL1R2/HYAL1 50

BP GO:0051271 negative regulation of cellular component movement 75/2416 352/18862 5.07061592876961e-06 7.93198712216979e-05 5.526614128746e-05 TIMP1/THY1/PBLD/IFITM1/MAGI2/GREM1/SULF1/PPARGC1A/PADI2/CX3CL1/PPARG/ADAMTS9/ARHGDIB/CCL2/ROBO1/GJA1/MIR21/TACSTD2/ANGPT2/IL33/HOXA7/SLC9A3R1/ACVR1C/CD74/MARVELD3/OSBPL8/IGFBP5/COL3A1/SLAMF8/CXCL13/MMRN2/TIE1/APOH/CALR/DPYSL3/SERPINF1/ADA/STC1/MMP28/HYAL2/PTPRM/CCL21/MEOX2/PTPRR/DUSP10/IL24/AIF1/IL27RA/WASL/DCN/MIF/WAS/BMP5/MCC/DUSP22/CLIC4/FGF2/BST2/CD300A/SMAD7/ENG/TNF/EVL/SEMA6D/SEMG1/SERPINE1/MIR214/KLF4/APOD/PFN2/ADORA3/MCTP1/STAP1/SFRP2/CXCL12 75

BP GO:0030099 myeloid cell differentiation 86/2416 419/18862 5.14243220741933e-06 8.02327119272755e-05 5.59021632909046e-05 IFI16/MMP9/LYN/HOXA9/HIF1A/SNX10/HLA-DRB1/HCLS1/ACVR2A/PIAS3/STAT1/GPR183/CDKN2B/PPARG/HOXA5/LILRB1/UBASH3B/HOXA7/MT1G/LILRB3/FBN1/FLVCR1/CD74/PF4/SCIN/JUNB/CEBPB/BATF3/JAK2/CSF3R/CEBPA/LEF1/STAT3/GPR137B/HMGB3/ETS1/IKZF1/EVI2B/NCKAP1L/NME1/TLR2/CCL19/GPR171/CCR7/EPHA2/LTF/SPI1/LILRB4/RASSF2/NR4A3/CSF1R/IL23A/TYROBP/CA2/IRF4/PIK3CD/BCL6/CCR1/TNFSF11/BATF2/BATF/MAFB/PRKCQ/ISG15/TNF/FBXW7/FOS/PTPN6/OSCAR/HOXB7/NFKBIA/LIF/INHBA/ZFP36/F2RL1/MYL9/MEIS1/IFNG/IRF8/TLR4/SH2B3/TSPAN2/ZNF385A/TCIRG1/IL11/CSF3 86

BP GO:0061756 leukocyte adhesion to vascular endothelial cell 20/2416 54/18862 5.38832741102151e-06 8.38496902602825e-05 5.84222939026518e-05 VCAM1/SELP/ICAM1/ITGB2/MIR21/PTAFR/SELL/ETS1/MADCAM1/CCL21/SELPLG/ITGA4/TNF/GCNT1/ST3GAL4/SELE/IL6/JAM2/KLF4/CXCL12 20

BP GO:0002064 epithelial cell development 50/2416 207/18862 5.47930169151961e-06 8.50433283371273e-05 5.92539615489169e-05 MSN/PECAM1/RILPL2/HIF1A/MAGI2/IL1B/TNMD/EPB41L5/HOXA5/ICAM1/SLC9A3R1/IFT74/COL15A1/HEG1/CLDN1/CDH5/PPP1R16B/VIM/HNF4A/PODXL/TPRN/RAB13/STC1/CXCR4/EXPH5/IHH/EPHA2/SLITRK6/BMP5/GPR4/SHROOM3/COL18A1/AKR1B1/CLIC4/VSIG1/ROBO4/S1PR3/ENG/TNF/MYADM/TJP3/FLNA/WNT5A/LAMB2/TFCP2L1/F2RL1/GRHL2/BFSP2/HOXB13/MARVELD2 50

BP GO:0000302 response to reactive oxygen species 53/2416 224/18862 5.56156502406496e-06 8.60959156972134e-05 5.99873520709126e-05 MMP3/PDK2/MMP9/MAP3K5/HIF1A/PDE8A/ANXA1/PPARGC1A/MT3/FYN/MIR21/SIRPA/CFLAR/PDGFRB/EDN1/PINK1/BTK/ADA/HYAL2/BMP7/ETS1/FOSL1/UCP2/MB/COL1A1/SOD2/HGF/CCL19/CCR7/LRRK2/NR4A3/CD36/FBLN5/FABP1/SPHK1/FOS/PKD2/IL6/S100A7/CAT/ADAM9/IL18RAP/TNFAIP3/NET1/BNIP3/AQP1/KLF4/ENDOG/AKR1C3/SOD3/APOD/H19/HYAL1 53

BP GO:0071677 positive regulation of mononuclear cell migration 22/2416 63/18862 5.70061358074822e-06 8.8019836635387e-05 6.13278444942779e-05 CXCL10/CXCL13/CCL20/CCR6/CCL4/CALR/DOCK8/PLA2G7/MADCAM1/CCL21/CXCL17/CCR7/AIF1/CCR1/ITGA4/TNF/WNT5A/JAM2/SERPINE1/S100A7/FPR2/CXCL12 22

BP GO:0031667 response to nutrient levels 91/2416 451/18862 5.73989198838233e-06 8.83973029735367e-05 6.15908442653836e-05 SLC16A1/IFI16/VCAM1/PDK2/C2/HSPA5/NPY/CPT1A/MAP3K5/KYNU/PCK2/SIK1/ZC3H12A/PPARGC1A/CD40/SCTR/ADM/FADS1/MT3/SLC39A5/MMP7/NUCB2/CDKN2B/PPARG/ICAM1/NOD2/NR1H4/XBP1/PCK1/OTC/SPARC/TNC/HMGCL/ALAD/ACVR1C/CXCL10/SLC6A19/VDR/REG1A/SSTR1/AQP3/ASS1/APPL2/RARRES2/TRIM24/SORD/SLC10A1/ADA/STC1/BMP7/SLC39A4/UCP2/PDK4/ACSL4/COL1A1/FOXO4/SOD2/GNAI2/SLC25A25/LIPG/ALDH1A2/CHSY1/LRRK2/LPL/CYP27B1/SLC27A4/LTA/PMAIP1/SPP1/CPEB4/SGIP1/SRD5A1/HSD11B2/ITGA2/CD3E/DSC2/BCKDHB/GPT/ZFP36/CAT/BNIP3/ACSL1/AKR1C3/BCHE/ADCYAP1/PCSK1N/TNFRSF11B/SFRP2/SNAI2/ABCG5/CPS1 91

BP GO:0009063 cellular amino acid catabolic process 31/2416 106/18862 5.83001808895841e-06 8.95538861087427e-05 6.23966938712451e-05 TAT/KYNU/ABAT/CBS/IDO1/GLUL/DDAH2/ASRGL1/DAO/MIR21/OTC/TDO2/HMGCL/ALDH5A1/ALDH6A1/HNMT/HIBCH/KMO/NOS2/DDO/AMT/AUH/SHMT2/SDSL/GOT1/ASPA/IL4I1/GPT/IDO2/HDC/CRYM 31

BP GO:0019216 regulation of lipid metabolic process 83/2416 402/18862 5.8986540953146e-06 9.0375265830527e-05 6.29689904100016e-05 LPCAT1/ACOX1/PDK2/HMGCS2/ABHD5/CPT1A/GRHL1/LYN/PEX11A/SERPINA3/FGR/ABCB11/CPT2/IL1B/C3/ANXA1/IGFBP7/SPHK2/SIK1/PPARGC1A/FGFR3/ADM/IRS1/FADS1/PPARG/NOD2/NR1H4/LPGAT1/PCK1/TWIST1/FABP3/MLYCD/VAV3/CLCN2/PDGFRB/CD74/TEK/G0S2/DGKQ/SCD/HNF4A/TM6SF2/CRTC3/APPL2/AGT/RARRES2/CCDC3/CAV1/FMO5/EPHX2/EGR1/PDK4/CCL21/SCAP/ACADM/GLIPR1/CCL19/CCR7/ME1/NR4A3/PDP1/CD36/BMP5/PTGS2/CYP27B1/CD19/FGF2/FABP1/SPHK1/APOC1/TNF/FBXW7/HMGCR/APOC2/PDK1/IFNG/ACSL1/AKR1C3/STARD4/APOD/ABCB4/FPR2/SNAI2 83

BP GO:0032743 positive regulation of interleukin-2 production 14/2416 30/18862 5.99411706476971e-06 9.13681271253899e-05 6.36607667802302e-05 IL1B/ANXA1/PTPRC/SASH3/CD86/PDE4B/CD80/RIPK2/CD83/MALT1/IL1A/IRF4/PRKCQ/CD3E 14

BP GO:0050901 leukocyte tethering or rolling 14/2416 30/18862 5.99411706476971e-06 9.13681271253899e-05 6.36607667802302e-05 VCAM1/SELP/PTAFR/SELL/MADCAM1/CCL21/SELPLG/ITGA4/TNF/GCNT1/ST3GAL4/SELE/JAM2/CXCL12 14

BP GO:0046486 glycerolipid metabolic process 88/2416 433/18862 6.05197306636971e-06 9.20146925397028e-05 6.41112614039434e-05 LPCAT1/LIPC/ETNK1/PLA2G2A/NAAA/INPP5J/ABHD5/CPT1A/ITPKA/AGPAT4/PLCD1/MTMR11/LPIN1/PIK3R3/PCK2/PLA1A/C3/IMPA2/PLCE1/SIK1/PNLIPRP2/PLD1/IP6K2/PRDX6/NR1H4/LPGAT1/PCK1/SOCS3/SOCS1/GPCPD1/FABP3/CWH43/BPNT1/PDGFRB/OSBPL8/ALPI/PGAP3/SLC44A1/CHPT1/DGKQ/APOH/PLEK/CHKA/CAV1/SLC22A4/GPD1L/PLA2G12A/OCRL/PIGZ/PLA2G7/ACSL4/PLA2G2D/PIK3R5/FAAH/LIPG/HADHA/SEL1L/MOGAT2/FABP2/ENPP2/ABHD3/CSF1R/GDPD3/PLCG2/LPL/MGLL/MBOAT1/PIK3CD/CETP/TTC7B/FGF2/PIP5K1B/NAPEPLD/CRLS1/FABP1/APOC1/FBXW7/SLC44A3/SERINC2/MTM1/APOC2/CAT/STARD10/ACSL1/FABP4/CDS1/MOGAT3/CPS1 88

BP GO:0030183 B cell differentiation 37/2416 137/18862 6.08704407069012e-06 9.2312424074588e-05 6.4318705929751e-05 VCAM1/GPR183/XBP1/NHEJ1/PTPRC/CD79A/SLAMF8/DOCK11/CR1/ST3GAL1/BTK/ADA/HMGB3/CD27/CMTM7/CLCF1/MALT1/FCGR2B/NCKAP1L/POU2AF1/FCRL3/LGALS1/PLCG2/HHEX/CD19/MS4A1/BCL6/MMP14/DNAJB9/ITGA4/PTPN6/INHBA/IL6/ITM2A/CR2/TCIRG1/IL11 37

BP GO:0071347 cellular response to interleukin-1 45/2416 180/18862 6.10661245469158e-06 9.2374137639497e-05 6.43617048724507e-05 IRAK3/CHI3L1/PSMB9/HIF1A/ZBP1/CCL11/IL1B/ZC3H12A/CD40/GBP1/CX3CL1/ICAM1/NOD2/CCL2/PCK1/MIR21/SIRPA/CCL18/GBP2/CCL20/TFPI/EDN1/CEBPB/CCL22/IL1RN/CCL4/KMO/RIPK2/MAP3K8/HYAL2/EGR1/PSMB8/CCL21/PELI2/CCL19/IL1R1/IL1A/CCL13/NLRP7/NFKBIA/ADAMTS12/IL6/PSMA8/IL1R2/HYAL1 45

BP GO:2000107 negative regulation of leukocyte apoptotic process 18/2416 46/18862 6.41929238249779e-06 9.68581837966755e-05 6.74859652203965e-05 HIF1A/IDO1/HCLS1/NOD2/LILRB1/EFNA1/IL7R/CD74/ST3GAL1/ADA/DOCK8/CD27/CCL21/CCL19/CCR7/BCL6/PRKCQ/CXCL12 18

BP GO:1901653 cellular response to peptide 81/2416 391/18862 6.6683866026774e-06 0.000100362586242316 6.99276585527973e-05 VCAM1/ENPP1/PDK2/EIF4EBP2/CASP4/LYN/RAB31/LPIN1/PIK3R3/PCK2/SLC25A33/IL1B/IRS1/PPARG/ICAM1/NOD2/NR1H4/XBP1/SLC30A10/PCK1/FYN/GJA1/SOCS3/SOCS1/INSR/FBN1/CFLAR/GAB1/OSBPL8/ADCY3/REG1A/EDN1/VIM/JAK2/ASS1/APPL2/RARRES2/EEF2K/RIPK2/STAT3/AGTRAP/RAB13/CAV1/ABCC1/UCP2/PDK4/FCGR2B/FOXO4/RHOQ/GNAI2/GOT1/NR4A3/CD36/CA2/LPL/RAB8B/AKR1B1/SLC27A4/PRKACB/GJB2/NR4A2/PRKCQ/SRD5A1/BCAR3/ADCY6/ITGA4/GHR/PRKAR2B/GPT/ADCY4/STAT5A/KLF4/ATP6V0D2/CAV2/TLR4/PRKAR1A/GRB14/TCIRG1/ERRFI1/FPR2/CPS1 81

BP GO:0071548 response to dexamethasone 16/2416 38/18862 6.83937346256235e-06 0.000102676740143253 7.15400458963502e-05 PCK2/ICAM1/PCK1/PTAFR/CFLAR/DDIT4/CLDN1/EDN1/ASS1/SERPINF1/FIBIN/GJB2/SRD5A1/AQP1/ERRFI1/CPS1 16

BP GO:0043405 regulation of MAP kinase activity 67/2416 307/18862 6.90658961808302e-06 0.000103425311868781 7.20616134444262e-05 IRAK3/PEA15/DUSP4/LYN/MAP3K5/IL1B/RGS2/TRIB2/PLCE1/CD40/LAX1/NOD2/FPR1/TGFA/ROBO1/PTPRC/INSR/MLKL/PDGFRB/PROK2/CD74/DNAJA1/PDCD4/EDN1/MAPKAPK2/FZD5/EDN3/AGT/RIPK2/RASGRP1/DUSP14/DUSP21/CAV1/HYAL2/BMP7/S100A12/CBLC/CXCR4/TNIK/PIK3R5/HGF/DUSP10/AVPI1/CXCL17/CCL19/RGS4/MAP4K1/LRRK2/PKN1/FGF2/TNFSF11/CD300A/TNF/C5AR1/PTPN6/WNT5A/GHR/NRG1/FZD10/MUC20/SERPINB3/TLR4/SH2B3/ADORA2B/SFRP2/MAP2K6/DKK1 67

BP GO:0048754 branching morphogenesis of an epithelial tube 38/2416 143/18862 6.94247134908272e-06 0.000103702078297075 7.22544505266623e-05 FGFR2/COL4A1/CCL11/GREM1/CTSH/LAMA1/HOXA5/TACSTD2/TNC/PBX1/EDN1/TIE1/AGT/LEF1/PLXND1/EDNRA/BMP7/KDR/SEMA3E/IHH/RASIP1/EPHA2/ESRP2/CLIC4/FGF2/MMP14/ENG/NRARP/TNF/HOXB7/WNT5A/DCHS1/PKD2/DDR1/FOXF1/SFRP2/WNT2/LAMA5 38

BP GO:0030316 osteoclast differentiation 28/2416 92/18862 7.02975702573975e-06 0.000104482174247902 7.27979825870673e-05 SNX10/PIAS3/GPR183/LILRB1/UBASH3B/LILRB3/FBN1/JUNB/CEBPB/GPR137B/EPHA2/LTF/LILRB4/RASSF2/CSF1R/IL23A/TYROBP/CA2/CCR1/TNFSF11/MAFB/TNF/FBXW7/FOS/OSCAR/IFNG/TLR4/TCIRG1 28

BP GO:1901655 cellular response to ketone 28/2416 92/18862 7.02975702573975e-06 0.000104482174247902 7.27979825870673e-05 MSN/PCK2/SPHK2/TRERF1/PPARG/ICAM1/PCK1/DCPS/CFLAR/TNC/DDIT4/ADCY3/ASS1/SERPINF1/FDX1/MAP4K1/AKR1B1/GJB2/SPP1/SRD5A1/ADCY6/PTGFR/AQP1/KLF4/AKR1C3/SCNN1B/ERRFI1/AHR 28

BP GO:0043409 negative regulation of MAPK cascade 45/2416 181/18862 7.13299829410836e-06 0.000105752910032054 7.36833680813236e-05 IRAK3/RPS6KA6/DUSP4/CNKSR3/LYN/IL1B/RGS2/GBP1/LAX1/EFNA1/MIR21/SIRPA/PTPRC/SLC9A3R1/CAMK2N1/DNAJA1/MARVELD3/PDCD4/TIMP3/AGT/PINK1/DUSP14/DUSP21/SEMA6A/CAV1/HYAL2/BMP7/CBLC/PTPRR/DUSP10/RGS4/LILRB4/CD300A/NDRG2/TBC1D10C/PTPN6/LIF/F2RL1/KLF4/SERPINB3/SH3RF2/TLR4/SH2B3/SFRP2/ERRFI1 45

BP GO:0098869 cellular oxidant detoxification 30/2416 102/18862 7.22800648991848e-06 0.000106656907924992 7.43132288527187e-05 DUOX2/GPX8/PRDX4/MT3/S100A9/PRDX6/MIR21/PTGES/CLIC2/APOM/BMP7/GPX7/PXDN/IYD/SOD2/NXN/CD36/FBLN5/PTGS2/FABP1/IPCEF1/GSTA1/CAT/GSTO2/GPX2/SOD3/MGST1/H19/ALOX5AP/GSTT1 30

BP GO:0006809 nitric oxide biosynthetic process 24/2416 73/18862 7.22976355733167e-06 0.000106656907924992 7.43132288527187e-05 IL1B/ZC3H12A/DDAH2/ICAM1/ITGB2/SIRPA/INSR/CD34/EDN1/JAK2/ASS1/NOS2/CAV1/CLU/SPR/CD36/PTGS2/P2RX4/TNF/PKD2/KLF4/IFNG/TLR4/HSP90AB1 24

BP GO:0072006 nephron development 37/2416 138/18862 7.30329773996853e-06 0.000107475690198055 7.48837156183907e-05 PECAM1/MAGI2/GREM1/SEC61A1/SULF1/PLCE1/STAT1/AQP11/TACSTD2/ANGPT2/CFLAR/PDGFRB/CD34/BASP1/TEK/PBX1/HES5/AGT/PODXL/BMP7/EGR1/SULF2/WWTR1/NID1/HNF1B/GPR4/SERPINB7/FGF2/PROM1/HOXB7/DCHS1/PKD2/LAMB2/WNK4/LIF/LAMA5/OSR1 37

BP GO:0048247 lymphocyte chemotaxis 22/2416 64/18862 7.64297723614562e-06 0.000112197399821251 7.81735680492467e-05 CCL11/PADI2/GPR183/CX3CL1/CH25H/CCL2/CCL18/CXCL10/CXCL11/CXCL13/CCL20/CCL22/CCL4/CXCL16/CCL21/CCL19/CCL13/PIK3CD/WNT5A/CKLF/S100A7/C10orf99 22

BP GO:0006869 lipid transport 92/2416 461/18862 8.13318878671315e-06 0.000119100258400025 8.29831365927411e-05 OSBPL1A/VLDLR/LIPC/ABCB1/PLA2G2A/APOL1/PITPNC1/CPT1A/GRAMD1C/ABCA12/APOL3/CYP4F2/ABCB11/SLC25A20/PLA2G12B/CPT2/IL1B/ANXA1/PPFIA3/OSBPL3/CROT/LRRC8C/PPARG/NR1H4/SPNS2/SLC10A2/GJA1/AQP9/ABCA8/ATP8A1/FABP3/GLTP/SLC7A11/APOL2/OSBPL8/PRAF2/EDN1/APOH/ATP8B2/AGT/KMO/NOS2/PTGES/SLC10A1/APOM/CHKA/CAV1/STXBP1/CLU/PLA2G12A/ABCC1/APOL6/ACSL4/PLA2G2D/ATP9A/SLC1A3/LIPG/SLC1A4/FABP2/ABCD3/CD36/KCNJ10/CETP/SLC27A4/ABCC3/TNFSF11/FABP1/APOLD1/SLCO1B3/SPP1/ATP10D/ITGAV/P2RX4/APOC1/NFKBIA/SLC27A2/ANO9/ANO7/INHBA/APOC2/APOO/ABCA5/SLC1A1/STARD10/ACSL1/FABP4/STARD4/APOD/PRELID2/ABCB4/MAP2K6/ABCG5 92

BP GO:0003014 renal system process 33/2416 118/18862 8.53159162442935e-06 0.000124628152160782 8.68346980350201e-05 TMEM63C/CYP4F2/SULF1/ADM/MAGED2/MCAM/GJA1/SLC9A3R1/CYP4F12/CD34/ADCY3/EDN1/AQP3/AGT/STC1/HYAL2/SULF2/IGKV3-20/GNAI2/WFS1/PKN1/AKR1B1/PRKACB/ADCY6/HSD11B2/WNK4/PRKAR2B/ADCY4/F2RL1/AQP1/SLC15A2/AKR1C3/PRKAR1A 33

BP GO:0042531 positive regulation of tyrosine phosphorylation of STAT protein 23/2416 69/18862 8.60161249151734e-06 0.000125343790829935 8.73333194673425e-05 PARP9/LYN/HCLS1/CD40/FGFR3/FYN/SOCS3/HES5/JAK2/STAT3/CLCF1/STAP2/IL24/PTK6/CSF1R/IL23A/PARP14/TNF/GHR/LIF/IL6/IFNG/OSM 23

BP GO:0045576 mast cell activation 21/2416 60/18862 8.88056960955712e-06 0.000128880005535666 8.97971780003892e-05 LYN/FGR/SPHK2/NDRG1/HAVCR1/RAC2/PTGDR/LCP2/IL13RA2/PTGDS/BTK/STXBP1/RHOH/S100A12/NR4A3/PIK3CD/CD300LF/CD300A/ENPP3/FOXF1/CHGA 21

BP GO:0006641 triglyceride metabolic process 31/2416 108/18862 8.88753058308035e-06 0.000128880005535666 8.97971780003892e-05 LIPC/ABHD5/CPT1A/LPIN1/PCK2/C3/SIK1/PNLIPRP2/LPGAT1/PCK1/FABP3/APOH/CAV1/SLC22A4/ACSL4/LIPG/SEL1L/MOGAT2/FABP2/LPL/MGLL/CETP/FABP1/APOC1/FBXW7/APOC2/CAT/ACSL1/FABP4/MOGAT3/CPS1 31

BP GO:0060541 respiratory system development 46/2416 188/18862 8.91509466812616e-06 0.000128965932577747 8.98570476897233e-05 SLC23A1/CHI3L1/FGFR2/MMP12/PDPN/EDN2/ABCA12/CTSH/LAMA1/TMEM38B/HOXA5/SPARC/TNC/PDGFRB/SLC7A11/HEG1/BASP1/IGFBP5/MME/ZFPM2/ASS1/CEBPA/LEF1/ADA/TULP3/HSD11B1/FGF9/ALDH1A2/GATA6/RCN3/ESRP2/THRB/FGF2/PKDCC/MMP14/MSC/TNF/FBXW7/WNT5A/LIF/GRHL2/ALDH1A3/FOXF1/WNT2/ERRFI1/LAMA5 46

BP GO:0032526 response to retinoic acid 30/2416 103/18862 8.96178217288791e-06 0.000129327413439254 9.01089095757431e-05 FGFR2/HOXA2/LYN/HSD17B2/IGFBP7/CTSH/LTK/PPARG/PCK1/GJA1/TNC/PDGFRB/MICB/CD38/AQP3/TIE1/GJB3/PTGES/SERPINF1/COL1A1/PTK6/ALDH1A2/GATA6/GJB2/WNT5A/FZD10/AQP1/KLF4/WNT2/OSR1 30

BP GO:0045834 positive regulation of lipid metabolic process 39/2416 150/18862 9.27706319404908e-06 0.000133553856609982 9.30536849746342e-05 ABHD5/CPT1A/LYN/FGR/IL1B/ANXA1/SPHK2/PPARGC1A/FGFR3/ADM/IRS1/PPARG/NOD2/NR1H4/LPGAT1/TWIST1/FABP3/MLYCD/VAV3/PDGFRB/CD74/TEK/AGT/CCDC3/CCL21/SCAP/CCL19/CCR7/NR4A3/PTGS2/CD19/FGF2/FABP1/APOC1/TNF/APOC2/IFNG/STARD4/FPR2 39

BP GO:0002888 positive regulation of myeloid leukocyte mediated immunity 10/2416 17/18862 9.62234231383544e-06 0.000137533832831319 9.58267344612424e-05 C3/ITGB2/PTAFR/BTK/MAVS/TYROBP/DDX21/F2RL1/STAP1/CD177 10

BP GO:0033631 cell-cell adhesion mediated by integrin 10/2416 17/18862 9.62234231383544e-06 0.000137533832831319 9.58267344612424e-05 ITGA5/CXCL13/PODXL/ADA/SWAP70/ITGA4/CD3E/FERMT3/SKAP1/ADAM9 10

BP GO:0042326 negative regulation of phosphorylation 83/2416 407/18862 9.6227530689027e-06 0.000137533832831319 9.58267344612424e-05 IRAK3/ENPP1/INPP5J/DUSP4/THY1/PBLD/CNKSR3/LYN/DNAJC10/IL1B/PMEPA1/GREM1/RGS2/TRIB2/ZC3H12A/PPARGC1A/PKIB/SH3BP5/CDKN2B/LAX1/SOCS3/TWIST1/SOCS1/CTDSPL/UBASH3B/SIRPA/PTPRC/CAMK2N1/DNAJA1/DDIT4/HEG1/PDCD4/PKIA/ITPRIP/DGKQ/GMFG/AGT/CEBPA/DUSP14/DUSP21/CAV1/SEMA4D/PRR5L/GPD1L/RHOH/HYAL2/BMP7/SAMSN1/CBLC/RASIP1/WWTR1/HGF/DUSP10/PTK6/RGS4/LRRK2/LILRB4/RASSF2/DUSP22/HHEX/PKN1/OCLN/CD300A/SH3GL2/PARP14/SMAD7/ENG/MYADM/PTPN6/PPP1R1B/PRKAR2B/INHBA/TNFAIP3/IFNG/SERPINB3/FABP4/SH2B3/STAP1/XDH/PRKAR1A/SFRP2/ERRFI1/DKK1 83

BP GO:0001776 leukocyte homeostasis 25/2416 79/18862 1.00601526198943e-05 0.000143441410561172 9.99428408095771e-05 LYN/HIF1A/ANXA1/GPR183/CXCL6/SPNS2/TNFSF13B/SLC7A11/CD74/PDE4B/IL2RA/DOCK11/CORO1A/ADA/NCKAP1L/PIK3CD/PKN1/PMAIP1/SIT1/IL6/TNFAIP3/SH2B3/GAPT/TCIRG1/TNFRSF17 25

BP GO:0045622 regulation of T-helper cell differentiation 16/2416 39/18862 1.02224649128247e-05 0.000145407854129916 0.000101312960887058 HLA-DRB1/ANXA1/ZC3H12A/NFKBIZ/MIR21/HLA-DRA/CD86/IL12RB1/CD80/RIPK2/MALT1/CCL19/IL23A/IRF4/BCL6/SMAD7 16

BP GO:0010632 regulation of epithelial cell migration 64/2416 293/18862 1.06647051700747e-05 0.000151337244794394 0.00010544426540337 SEMA5A/MMP9/PBLD/HIF1A/GLUL/ANXA1/EPB41L5/CTSH/ZC3H12A/CD40/EPB41L4B/PPARG/ADAMTS9/VEGFC/EFNA1/MIR21/TACSTD2/ANGPT2/SPARC/VIL1/SEMA4A/RHOJ/PLK2/MARVELD3/TEK/CXCL13/EDN1/MMRN2/CCR6/APOH/CALR/AGT/SERPINF1/STC1/KDR/ETS1/PTPRM/MEOX2/MAP4K4/PTPRR/DUSP10/ANXA3/EPHA2/ENPP2/DCN/MCC/FUT1/PTGS2/PLCG2/PIK3CD/FGF2/P2RX4/TNF/FBXW7/EVL/ITGA2/WNT5A/ADAM9/STAT5A/KLF4/SH3BP1/IFNG/PFN2/HYAL1 64

BP GO:0006801 superoxide metabolic process 23/2416 70/18862 1.1270151069596e-05 0.000159548932006633 0.000111165760643971 DUOX2/NCF2/MT3/ITGB2/MIR21/EDN1/NOS2/NCF4/SH3PXD2B/BMP7/SOD2/GNAI2/PREX1/CD36/FBLN5/TYROBP/HVCN1/F2RL1/SOD3/PON3/H19/FPR2/CD177 23

BP GO:0010810 regulation of cell-substrate adhesion 51/2416 218/18862 1.15856228506119e-05 0.000163626332202955 0.00011400669031096 GCNT2/MMP12/PDPN/ITGA5/THY1/OLFM4/GREM1/FERMT2/EPB41L5/GBP1/CX3CL1/EFNA5/TACSTD2/ANGPT2/RAC2/HOXA7/PLAU/TEK/JAK2/CEACAM6/CALR/EGFL6/CCDC80/EFEMP2/KDR/SEMA3E/P4HB/CCL21/MAP4K4/COL1A1/NID1/CCR7/LGALS1/PREX1/SPOCK2/EGFLAM/CD36/FUT1/DUSP22/BCL6/MMP14/RCC2/MYADM/FLNA/CD3E/SKAP1/FN1/SERPINE1/DDR1/APOD/FOXF1 51

BP GO:0071466 cellular response to xenobiotic stimulus 34/2416 125/18862 1.20816365228126e-05 0.000170228259281237 0.000118606584751763 CYP2B6/UGT1A6/CBR3/SULT1A2/CMBL/ACAA1/SULT1A1/NQO2/BPHL/UGT2B28/HNF4A/CES2/UGT2B15/NR1I2/S100A12/GSTM4/CYP3A4/CES3/CYP2J2/NAT2/GSTA1/SULT1B1/CYP2S1/EPHX1/ACSL1/GSTO2/PON3/AKR7A3/NAT1/MGST1/HSP90AB1/CYP2C9/AHR/FMO1 34

BP GO:0062013 positive regulation of small molecule metabolic process 37/2416 141/18862 1.24204299827447e-05 0.000174589062964997 0.000121644975873704 CLYBL/CPT1A/HIF1A/PFKFB3/IL1B/ANXA1/ENTPD5/PPARGC1A/ADM/IRS1/PPARG/NR1H4/LPGAT1/PTAFR/TWIST1/INSR/MLYCD/GUCA2B/CD74/P2RY1/NOS2/PINK1/PFKFB2/VCP/GUCA2A/SLC4A4/DYRK2/SCAP/NR4A3/PTGS2/FABP1/PMAIP1/TNF/GPT/APOC2/IFNG/STARD4 37

BP GO:0007160 cell-matrix adhesion 53/2416 230/18862 1.24597292390733e-05 0.000174729379446769 0.000121742741419552 VCAM1/MMP12/THY1/GREM1/FERMT2/EPB41L5/CX3CL1/ADAMTS9/EFNA5/ITGB2/CD44/HOXA7/PLAU/CD34/TEK/COL3A1/ZYX/SNED1/CEACAM6/PARVG/ITGAL/EFEMP2/KDR/SEMA3E/MADCAM1/CCL21/MAP4K4/NID1/CCR7/CD36/FBLN5/FUT1/DUSP22/TESK2/BCL6/MMP14/COL5A3/RCC2/ITGAV/ITGA4/SGCE/ITGA2/CD3E/FERMT3/ADAMTS12/SKAP1/FN1/SERPINE1/DDR1/ADAM9/APOD/NID2/LYVE1 53

BP GO:0001676 long-chain fatty acid metabolic process 33/2416 120/18862 1.25664079546737e-05 0.000175811716924543 0.000122496860343929 ACOX1/CYP2B6/CPT1A/ACOT8/CYP4F2/CPT2/TBXAS1/FADS1/ACAA1/PAM/ACOT4/CYP4F12/PTGDS/PTGES/EPHX2/GSTM4/ACSL4/FAAH/CYP3A4/CYP2J2/PTGS2/MGLL/HPGD/SLC27A4/HPGDS/GSTA1/SLC27A2/CYP2S1/EPHX1/ACSL1/AKR1C3/ACSM3/CYP2C9 33

BP GO:0002673 regulation of acute inflammatory response 18/2416 48/18862 1.29152276923418e-05 0.000180268751865006 0.000125602300619471 C2CD4A/IL1B/C3/OSMR/PPARG/C2CD4B/PTGES/BTK/PLA2G2D/FCGR2B/CCR7/PTGS2/TNFSF11/TNF/KLKB1/IL6/ADCYAP1/OSM 18

BP GO:1990748 cellular detoxification 32/2416 115/18862 1.29953875457907e-05 0.000180963807880636 0.000126086581082499 DUOX2/GPX8/ABCG2/PRDX4/MT3/S100A9/PRDX6/MIR21/PTGES/CLIC2/APOM/BMP7/GPX7/PXDN/IYD/SOD2/NXN/CD36/FBLN5/AKR1B10/PTGS2/FABP1/IPCEF1/GSTA1/CAT/GSTO2/GPX2/SOD3/MGST1/H19/ALOX5AP/GSTT1 32

BP GO:0042509 regulation of tyrosine phosphorylation of STAT protein 26/2416 85/18862 1.33615125341499e-05 0.000185628472502409 0.000129336687393501 PARP9/LYN/HCLS1/CD40/FGFR3/FYN/SOCS3/SOCS1/HES5/JAK2/STAT3/CAV1/CLCF1/STAP2/IL24/PTK6/CSF1R/IL23A/PARP14/TNF/GHR/LIF/IL6/IFNG/SH2B3/OSM 26

BP GO:0050854 regulation of antigen receptor-mediated signaling pathway 22/2416 66/18862 1.34179495510448e-05 0.000185979021684249 0.000129580932628817 THY1/LYN/GBP1/LAPTM5/PTPRC/SH2D1A/ADA/MALT1/LCK/FCGR2B/CCR7/FCRL3/LILRB4/CD160/CD19/PRKCH/CD300A/PTPN6/CD22/TRAT1/PAX5/STAP1 22

BP GO:0032757 positive regulation of interleukin-8 production 20/2416 57/18862 1.38429644300061e-05 0.000191122836092328 0.000133164886680366 IL1B/NOD2/AFAP1L2/F3/CD74/CD2/STAT3/FCN1/HYAL2/TLR2/TLR1/MAVS/TLR8/CD14/TNF/WNT5A/IL6/SERPINE1/F2RL1/TLR4 20

BP GO:0007043 cell-cell junction assembly 38/2416 147/18862 1.38531988576989e-05 0.000191122836092328 0.000133164886680366 CLDN2/PECAM1/IL1B/RAMP2/MPP7/TLN2/CLDN15/ESAM/NR1H4/GJA1/FSCN1/CDH11/HEG1/CLDN1/MARVELD3/CDH5/GJA4/EPB41L3/FZD5/AGT/GJB1/CLDN8/RAB13/CAV1/GJC1/EPHA2/CLDN23/OCLN/GJB2/PRKCH/SMAD7/TNF/DCHS1/UGT8/GRHL2/CLDN7/MARVELD2/SNAI2 38

BP GO:0150076 neuroinflammatory response 17/2416 44/18862 1.41138095236871e-05 0.000194268602219804 0.000135356700063075 MMP3/MMP9/IL1B/CX3CL1/CST7/CTSC/PTPRC/IL33/SYT11/TNFRSF1B/LRRK2/PTGS2/SPHK1/TNF/IL6/IFNG/STAP1 17

BP GO:0150077 regulation of neuroinflammatory response 16/2416 40/18862 1.50190345453192e-05 0.000206252179470282 0.000143706260687082 MMP3/MMP9/IL1B/CX3CL1/CST7/CTSC/PTPRC/IL33/SYT11/TNFRSF1B/LRRK2/PTGS2/SPHK1/TNF/IL6/STAP1 16

BP GO:0033630 positive regulation of cell adhesion mediated by integrin 11/2416 21/18862 1.52630262144396e-05 0.000208905947002144 0.000145555273917955 IFT74/CXCL13/PODXL/CCL21/NCKAP1L/PTPN6/CD3E/SKAP1/LIF/ADAM9/SFRP2 11

BP GO:0043087 regulation of GTPase activity 95/2416 487/18862 1.5282381357875e-05 0.000208905947002144 0.000145555273917955 AGFG2/THY1/CHN2/CCL11/ASAP3/RGS2/FERMT2/CD40/NGEF/CX3CL1/EFNA5/ARFGAP3/ICAM1/ARHGDIB/STMN3/CCL2/PLEKHG6/IQGAP2/MIR21/ABR/PLXNA2/CHN1/ARHGAP42/RGS5/CCL18/VAV3/FAM13A/RGS1/AGAP1/VAV1/CXCL13/CCL20/DOCK11/CCL22/SNX13/ARHGAP15/CCL4/SMAP2/ARHGEF6/GRTP1/RGS16/RASGRP1/PLXND1/SEMA4D/ASAP1/RHOH/GPR137B/OCRL/ARHGAP9/DOCK8/GPR65/ARHGAP25/CCL21/MAP4K4/RASIP1/NCKAP1L/TAGAP/CCL19/CCR7/RGS4/S1PR1/EPHA2/PREX1/LRRK2/ARHGEF10L/CCL13/TRAPPC6A/FGD3/SLC27A4/LLGL2/BCL6/FGD5/RCC2/TBC1D12/BCAR3/RAP1GAP/TBC1D10C/ARHGAP30/ARHGAP39/WNT5A/SIPA1/FZD10/ACAP1/RASGRP2/F2RL1/NET1/RASAL3/SH3BP1/FICD/CAV2/ASAP2/ADCYAP1/ERRFI1/RGS18/ALDH1A1 95

BP GO:0048771 tissue remodeling 43/2416 175/18862 1.5413977252794e-05 0.000210007479841694 0.000146322767215733 TIMP1/TGM2/HIF1A/SNX10/GREM1/HOXA3/BGN/GJA1/UBASH3B/RAC2/IGFBP5/CD38/CTHRC1/TIE1/RSPO3/AGT/DEF8/CAV1/GPR137B/PDK4/DDR2/IHH/S1PR1/EPHA2/RASSF2/CSF1R/IL23A/IL1A/CA2/TNFSF11/MMP14/SPP1/FLNA/LIF/IL6/MIR214/TNFAIP3/ACP5/ELF3/TNFRSF11B/TCIRG1/TMEM119/TPH1 43

BP GO:0045066 regulatory T cell differentiation 15/2416 36/18862 1.54334355991043e-05 0.000210007479841694 0.000146322767215733 HLA-DRB1/LILRB2/MIR21/IRF1/SOCS1/CTLA4/HLA-DRA/IL2RA/CR1/PLA2G2D/DUSP10/LILRB4/BCL6/LAG3/IFNG 15

BP GO:0032835 glomerulus development 21/2416 62/18862 1.58647038682409e-05 0.000215384134520992 0.00015006895278794 PECAM1/MAGI2/SULF1/PLCE1/ANGPT2/CFLAR/PDGFRB/CD34/BASP1/TEK/PODXL/BMP7/EGR1/SULF2/WWTR1/NID1/GPR4/SERPINB7/PROM1/LAMB2/OSR1 21

BP GO:0006575 cellular modified amino acid metabolic process 47/2416 198/18862 1.68162047165665e-05 0.00022778313661531 0.000158707960781949 DUOX2/DUOXA2/VNN1/MTHFD2/PLA2G2A/CTSK/CPT1A/PLA1A/CPT2/DUOXA1/CROT/CKMT2/CRAT/SLC7A11/OSBPL8/NAT8/ASS1/MTHFD1L/SLC16A2/CLIC2/OPLAH/SLC22A4/CHAC1/PLA2G12A/GSTM4/DIO3/PLA2G2D/IYD/ACADM/SHMT2/VNN2/ETHE1/MBOAT1/HPGDS/CHDH/GGT5/CKB/GSTA1/SULT1B1/SERINC2/GGT6/SLC1A1/GSTO2/SLC25A32/GGH/CRYM/GSTT1 47

BP GO:0043648 dicarboxylic acid metabolic process 28/2416 96/18862 1.71193330353165e-05 0.000231363321747134 0.000161202455721025 ME3/TAT/MTHFD2/PHYH/ACOT8/KYNU/GLUL/PCK2/ALDH18A1/NR1H4/PCK1/ACOT4/SLC7A11/ALDH5A1/MDH2/ASS1/MTHFD1L/SUCLG2/KMO/NAGS/DDO/SHMT2/GOT1/ME1/ASPA/ME2/MRPS36/SLC25A32 28

BP GO:0045444 fat cell differentiation 51/2416 221/18862 1.7269404794629e-05 0.00023286346736649 0.000162247682578736 ENPP1/PEX11A/RGS2/TRIB2/FERMT2/ZADH2/ZC3H12A/PPARGC1A/TMEM120A/PPARG/XBP1/MIR21/SOCS1/FABP3/VSTM2A/ALDH6A1/OSBPL8/CEBPB/ZFPM2/RARRES2/CEBPA/CCDC3/BMP7/ZBTB7C/PSMB8/WWTR1/DUSP10/STEAP4/NR4A3/EGR2/PTGS2/LPL/NOC3L/NAPEPLD/LRG1/MAFB/NR4A2/TNF/TRPM4/WNT5A/ZFP36/IL6/BNIP3/KLF4/FABP4/CDS1/ZNF385A/FRZB/SFRP2/IL11/TPH1 51

BP GO:1901224 positive regulation of NIK/NF-kappaB signaling 22/2416 67/18862 1.75802976105755e-05 0.000236520482526027 0.000164795708859975 IL1B/GREM1/NOD2/LAPTM5/CD86/IL18R1/PDCD4/EDN1/CALR/LRRC19/CD27/NMI/PTP4A3/TLR2/CCL19/IL23A/NR3C2/SPHK1/CD14/TNF/IFI35/TLR4 22

BP GO:0097237 cellular response to toxic substance 33/2416 122/18862 1.82812058668365e-05 0.000245396367041319 0.00017097998374744 DUOX2/GPX8/ABCG2/PRDX4/MT3/S100A9/PRDX6/MIR21/PINK1/PTGES/CLIC2/APOM/BMP7/GPX7/PXDN/IYD/SOD2/NXN/CD36/FBLN5/AKR1B10/PTGS2/FABP1/IPCEF1/GSTA1/CAT/GSTO2/GPX2/SOD3/MGST1/H19/ALOX5AP/GSTT1 33

BP GO:0060348 bone development 46/2416 193/18862 1.84166665741818e-05 0.000246659174791288 0.000171859845381779 FGFR2/PITX2/SNX10/GREM1/CHAD/SULF1/FGFR3/TMEM38B/BGN/SPNS2/LILRB1/PLS3/GJA1/TWIST1/PTPRC/PPIB/FBN1/TEK/STC1/SH3PXD2B/SEMA4D/TULP3/SULF2/IHH/COL1A1/TIFAB/CHSY1/LTF/CSGALNACT1/TYROBP/TNFSF11/MMP14/SERPINH1/SRD5A1/ENG/GLG1/FBXW7/PTPN6/DCHS1/MEIS1/SH2B3/ZNF385A/CDX1/TMEM119/SFRP2/MMP13 46

BP GO:0048706 embryonic skeletal system development 32/2416 117/18862 1.90700542646811e-05 0.000254837496451793 0.000177558093165369 FGFR2/PRRX1/HOXA2/HOXA9/HOXA3/SULF1/ACVR2A/HOXA5/HOXA4/CHST11/TWIST1/HOXA7/FLVCR1/PBX1/MTHFD1L/BMP7/HOXA6/SATB2/TULP3/HOXB6/SULF2/IHH/COL1A1/MMP14/HOXB5/HOXB7/WNT5A/HOXB9/GRHL2/PAX5/HYAL1/OSR1 32

BP GO:0097501 stress response to metal ion 10/2416 18/18862 1.91578072197513e-05 0.000255437429596684 0.000177976096743009 HSPA5/MT3/SLC30A10/MT1G/MT1F/MT1M/MT1E/MT1X/MT2A/SLC30A1 10

BP GO:1901617 organic hydroxy compound biosynthetic process 56/2416 251/18862 1.95555383328883e-05 0.000259596548361569 0.000180873963844293 OSBPL1A/CDH3/AMACR/HMGCS2/OPN3/SLC45A2/ACOX2/ACOT8/ITPKA/ABCB11/PCK2/IMPA2/SPHK2/OSBPL3/IP6K2/CH25H/NR1H4/DAO/PCK1/PTAFR/ACAA2/CLCN2/SLC7A11/DDC/PSAT1/CYP27A1/P2RY1/DGKQ/SCD/SRD5A3/PLEK/HSD17B3/ZEB2/SCAP/CYP3A4/GOT1/SPR/BMP5/PLCG2/CYP27B1/AKR1B1/FGF2/NR4A2/CYB5R2/SPHK1/TNF/WNT5A/SLC27A2/HMGCR/IFNG/AKR1C3/STARD4/HDC/SNAI2/TPH1/TYRP1 56

BP GO:0048660 regulation of smooth muscle cell proliferation 40/2416 160/18862 1.95568540628095e-05 0.000259596548361569 0.000180873963844293 FGFR2/TGM2/MMP9/MAP3K5/PPARGC1A/STAT1/CX3CL1/PPARG/ADAMTS1/GJA1/MIR21/PTAFR/PDGFRB/NQO2/IGFBP5/PDCD4/EDN1/HES5/JAK2/EFEMP2/SOD2/GNAI2/FGF9/AIF1/S1PR1/NR4A3/APLN/HPGD/AKR1B1/FGF2/NDRG2/TNF/ITGA2/CALCRL/IL6/MIR214/TNFAIP3/KLF4/IFNG/APOD 40

BP GO:0060485 mesenchyme development 62/2416 287/18862 2.07991665106781e-05 0.000274998827487789 0.000191605505905922 GCNT2/SEMA5A/FGFR2/PITX2/PDPN/PBLD/HIF1A/IL1B/GREM1/OLFM1/EOMES/FERMT2/EPB41L5/STAT1/HOXA5/ROBO1/EFNA1/MIR21/TWIST1/SEMA4A/PDGFRB/BASP1/PDCD4/ERBB3/EDN1/S100A4/ZFPM2/EDN3/OVOL2/MEOX1/LEF1/SEMA6A/EDNRA/SEMA4D/BNC2/BMP7/SEMA3E/COL1A1/WWTR1/HGF/MAD2L2/ALDH1A2/BMP5/SMAD7/ENG/SEMA6D/FLNA/WNT5A/DCHS1/PKD2/NRG1/IL6/FN1/SERPINB3/FOXF1/FRZB/BAMBI/SFRP2/WNT2/LAMA5/SNAI2/OSR1 62

BP GO:0006816 calcium ion transport 82/2416 409/18862 2.08094750330525e-05 0.000274998827487789 0.000191605505905922 CXCL9/THY1/CACNA2D4/LYN/SRI/SEC61A1/TRPM6/RAMP2/SPHK2/LILRB2/SESTD1/CX3CL1/TMEM38B/ICAM1/CCL2/LILRB1/FYN/GJA1/EHD3/SLC25A23/MIR21/TMEM37/UBASH3B/PTPRC/KCNE2/PDGFRB/APLNR/CXCL10/CXCL11/HPCA/PDE4B/RAMP3/GEM/GJA4/SLC24A3/CORO1A/CCL4/AFG3L2/TRPV1/CLIC2/STC1/CAV1/ITPR1/HOMER1/P2RX5/CXCR4/LCK/CCL21/GNAI2/SLC25A25/CCL19/CCR7/FCRL3/RGS4/TMEM38A/WFS1/PLCG2/CYP27B1/CD19/PANX1/MS4A1/FGF2/LILRA2/CCR1/MCOLN2/CYSLTR1/ITGAV/P2RX4/FAM155A/CACNA1D/TRPM4/PTPN6/PKD2/CALCRL/SEMG1/SLC30A1/CCR5/DHRS7C/CD33/GPR35/CXCL12/CLCA1 82

BP GO:0045670 regulation of osteoclast differentiation 21/2416 63/18862 2.09467490119872e-05 0.000276200495821778 0.000192442768635979 PIAS3/LILRB1/UBASH3B/LILRB3/FBN1/CEBPB/GPR137B/LTF/LILRB4/RASSF2/IL23A/TYROBP/CA2/CCR1/TNFSF11/MAFB/TNF/FBXW7/FOS/IFNG/TLR4 21

BP GO:0045807 positive regulation of endocytosis 28/2416 97/18862 2.11565801957341e-05 0.000278351474539901 0.000193941463627677 RAB31/MAGI2/GREM1/C3/PPARG/INSR/PPT1/APPL2/EEF2K/CLU/CCL21/NCKAP1L/CCL19/WASL/NEDD4L/LRRK2/PPP3CC/APLN/CD36/PLCG2/SGIP1/CD14/ITGA2/WNT5A/SELE/SERPINE1/F2RL1/STAP1 28

BP GO:0002468 dendritic cell antigen processing and presentation 9/2416 15/18862 2.2099078239989e-05 0.000289473640242493 0.000201690835527488 HLA-DRB1/NOD2/CD74/HLA-DRA/CCL21/FCGR2B/CLEC4A/CCL19/CCR7 9

BP GO:0033540 fatty acid beta-oxidation using acyl-CoA oxidase 9/2416 15/18862 2.2099078239989e-05 0.000289473640242493 0.000201690835527488 ACOX1/AMACR/ACOX2/ACOT8/CROT/ACAA1/CRAT/EHHADH/DECR2 9

BP GO:0019058 viral life cycle 72/2416 348/18862 2.21692305187207e-05 0.000289523969681458 0.00020172590257742 APOBEC3B/CD55/IFI16/SEC13/IFITM3/IFITM2/ISG20/ITGA5/LAMP3/IFITM1/HLA-DRB1/TRIM22/ZC3H12A/OAS2/ANPEP/NMT2/HAVCR1/BSG/ICAM1/CCL2/PPIB/CD74/SLC20A2/CD86/CLDN1/PPID/STOM/SMARCB1/NR5A2/TMEM39A/CR1/CD80/CIITA/VPS37B/SLC10A1/VCP/CAV1/FCN1/SLAMF1/FBXL2/HYAL2/APOBEC3G/CHMP4B/CXCR4/P4HB/SELPLG/SLPI/CLEC5A/CXCR6/LGALS1/NEDD4L/EPHA2/LTF/MAVS/FCN3/BST2/LY6E/ITGAV/ISG15/TNF/ITGA2/NUP210/CCR5/CAV2/CR2/SERPINB3/CXADR/OASL/TMPRSS4/HYAL1/CHMP4C/HSP90AB1 72

BP GO:0072539 T-helper 17 cell differentiation 13/2416 29/18862 2.22000761987293e-05 0.000289523969681458 0.00020172590257742 ZC3H12A/NFKBIZ/MIR21/SLAMF6/IL12RB1/STAT3/MALT1/IL23A/IRF4/BATF/SMAD7/LY9/IL6 13

BP GO:0016064 immunoglobulin mediated immune response 51/2416 223/18862 2.23840489966314e-05 0.000291221706504105 0.000202908801158371 CD55/C2/C4BPB/IGKC/SERPING1/HLA-DRB1/C3/CD40/C1R/IGLV2-23/IGLV3-19/NOD2/IGHM/PTPRC/IGLV1-44/CD74/TRBC1/IL13RA2/CCR6/CFI/C1S/CR1/BTK/IGLV6-57/CLU/C4BPA/CD27/FCER1G/IGHG1/CLCF1/FCGR2B/MAD2L2/IGKV3-20/IGKV4-1/IL27RA/IGHV1-69/TNFSF13/CD19/LTA/BCL6/SWAP70/BATF/TLR8/TNF/PTPN6/IGHD/IGKV1-5/CR2/HLA-DQB1/GAPT/TCIRG1 51

BP GO:0070482 response to oxygen levels 78/2416 385/18862 2.24279804170108e-05 0.000291221706504105 0.000202908801158371 VCAM1/CASP1/PDPN/PSMB9/HIF1A/RAMP2/PPARGC1A/ADM/NDRG1/MT3/PPARG/HSP90B1/ICAM1/PCK1/VEGFC/MIR21/TWIST1/ACAA2/ANGPT2/FAM162A/PAM/PLAU/CFLAR/PDGFRB/ALAD/CD34/DDIT4/TEK/REG1A/HIGD1A/CD38/EDN1/AQP3/HYOU1/EEF2K/NOS2/PINK1/AGTRAP/ADA/STC1/CAV1/EDNRA/ITPR1/BMP7/ETS1/UCP2/EGR1/CXCR4/P4HB/PLOD1/PSMB8/COL1A1/SOD2/SCAP/CCDC115/TLR2/GATA6/PTGS2/LTA/MMP14/FABP1/PMAIP1/APOLD1/NR4A2/CPEB4/HSD11B2/ITGA2/CAT/PDK1/MIR214/SLC1A1/BNIP3/AQP1/ENDOG/SOD3/PSMA8/CXCL12/CLCA1 78

BP GO:0002761 regulation of myeloid leukocyte differentiation 32/2416 118/18862 2.29913426889608e-05 0.000297887831361318 0.00020755342541865 LYN/HLA-DRB1/HCLS1/PIAS3/LILRB1/UBASH3B/HOXA7/LILRB3/FBN1/CD74/PF4/CEBPB/LEF1/GPR137B/EVI2B/NME1/LTF/LILRB4/RASSF2/IL23A/TYROBP/CA2/CCR1/TNFSF11/MAFB/TNF/FBXW7/FOS/LIF/INHBA/IFNG/TLR4 32

BP GO:0043552 positive regulation of phosphatidylinositol 3-kinase activity 14/2416 33/18862 2.31833296136299e-05 0.000299074988089251 0.000208380577183344 LYN/FGR/FGFR3/IRS1/NOD2/VAV3/PDGFRB/TEK/CCL21/CCL19/CCR7/CD19/FGF2/FPR2 14

BP GO:0045589 regulation of regulatory T cell differentiation 14/2416 33/18862 2.31833296136299e-05 0.000299074988089251 0.000208380577183344 HLA-DRB1/LILRB2/MIR21/IRF1/SOCS1/CTLA4/HLA-DRA/IL2RA/CR1/DUSP10/LILRB4/BCL6/LAG3/IFNG 14

BP GO:0015718 monocarboxylic acid transport 43/2416 178/18862 2.40348823093677e-05 0.000309390709641105 0.000215568058907481 SLC16A1/ABCG2/PLA2G2A/ABCB11/PLA2G12B/IL1B/ANXA1/PPFIA3/SLC16A14/LRRC8C/NR1H4/SLC10A2/GJA1/AQP9/EMB/SLC16A9/SLC9A3R1/SLC7A11/SLC16A5/PRAF2/EDN1/KMO/NOS2/PTGES/SLC10A1/SLC16A2/SLC16A4/STXBP1/PLA2G12A/PLA2G2D/SLC1A3/SLC1A4/CD36/KCNJ10/SLC27A4/ABCC3/SLC16A6/TNFSF11/SLCO1B3/P2RX4/SLC1A1/ABCB4/MAP2K6 43

BP GO:0030323 respiratory tube development 41/2416 167/18862 2.45565271570769e-05 0.00031542435744866 0.000219772004615853 SLC23A1/CHI3L1/FGFR2/MMP12/PDPN/EDN2/ABCA12/CTSH/LAMA1/TMEM38B/HOXA5/SPARC/TNC/PDGFRB/SLC7A11/HEG1/IGFBP5/MME/ZFPM2/CEBPA/ADA/TULP3/HSD11B1/FGF9/ALDH1A2/GATA6/RCN3/ESRP2/THRB/FGF2/PKDCC/MMP14/TNF/FBXW7/WNT5A/LIF/GRHL2/FOXF1/WNT2/ERRFI1/LAMA5 41

BP GO:0046328 regulation of JNK cascade 34/2416 129/18862 2.48820980912958e-05 0.000318918934675533 0.000222206852224475 MAP3K5/IL1B/NOD2/SIRPA/DNAJA1/MARVELD3/PDCD4/UNC5CL/PINK1/RIPK2/RASGRP1/SLAMF1/CD27/SH3RF3/MAGI3/CCL21/MAP4K4/FCGR2B/DUSP10/CCL19/CCR7/RASSF2/DUSP22/TNFSF11/TRAF1/TNF/WNT5A/SH3RF1/PHLPP1/F2RL1/SERPINB3/SH3RF2/TLR4/SFRP2 34

BP GO:0043547 positive regulation of GTPase activity 82/2416 411/18862 2.49860379669578e-05 0.000319563919062379 0.000222656245266882 AGFG2/THY1/CHN2/CCL11/ASAP3/RGS2/FERMT2/CD40/NGEF/CX3CL1/ARFGAP3/ICAM1/ARHGDIB/CCL2/PLEKHG6/IQGAP2/ABR/CHN1/ARHGAP42/RGS5/CCL18/VAV3/FAM13A/RGS1/AGAP1/VAV1/CXCL13/CCL20/DOCK11/CCL22/SNX13/ARHGAP15/CCL4/SMAP2/ARHGEF6/GRTP1/RGS16/RASGRP1/SEMA4D/ASAP1/OCRL/ARHGAP9/DOCK8/GPR65/ARHGAP25/CCL21/MAP4K4/NCKAP1L/TAGAP/CCL19/CCR7/RGS4/S1PR1/EPHA2/PREX1/LRRK2/ARHGEF10L/CCL13/SLC27A4/LLGL2/RCC2/TBC1D12/BCAR3/RAP1GAP/TBC1D10C/ARHGAP30/ARHGAP39/WNT5A/SIPA1/FZD10/ACAP1/RASGRP2/F2RL1/NET1/RASAL3/SH3BP1/CAV2/ASAP2/ADCYAP1/ERRFI1/RGS18/ALDH1A1 82

BP GO:0002532 production of molecular mediator involved in inflammatory response 26/2416 88/18862 2.63622039825554e-05 0.000335007965322025 0.00023341688858979 LYN/HIF1A/ZC3H12A/NOD2/MIR21/GBP5/SIRPA/PDCD4/SLAMF8/GPSM3/APPL2/NOS2/STAT3/BTK/DUSP10/LILRB4/CD36/NLRP7/NLRC3/TNF/IL6/SERPINE1/TLR4/APOD/IL1R2/H19 26

BP GO:0007260 tyrosine phosphorylation of STAT protein 26/2416 88/18862 2.63622039825554e-05 0.000335007965322025 0.00023341688858979 PARP9/LYN/HCLS1/CD40/FGFR3/FYN/SOCS3/SOCS1/HES5/JAK2/STAT3/CAV1/CLCF1/STAP2/IL24/PTK6/CSF1R/IL23A/PARP14/TNF/GHR/LIF/IL6/IFNG/SH2B3/OSM 26

BP GO:0010232 vascular transport 26/2416 88/18862 2.63622039825554e-05 0.000335007965322025 0.00023341688858979 SLC16A1/ABCB1/ABCG2/SLC22A5/SLC7A5/KCNJ8/SLC6A20/GJA1/ATP8A1/INSR/SLC9A3R1/SLC2A3/SLC44A1/SLC24A3/SLC6A6/SLC16A2/SLC4A4/ABCC1/SLC1A3/SLC1A4/CD36/SLC27A4/ABCC3/SLC5A1/SLC1A1/SLC15A2 26

BP GO:0048659 smooth muscle cell proliferation 40/2416 162/18862 2.66414830957437e-05 0.000337836679256665 0.000235387795773144 FGFR2/TGM2/MMP9/MAP3K5/PPARGC1A/STAT1/CX3CL1/PPARG/ADAMTS1/GJA1/MIR21/PTAFR/PDGFRB/NQO2/IGFBP5/PDCD4/EDN1/HES5/JAK2/EFEMP2/SOD2/GNAI2/FGF9/AIF1/S1PR1/NR4A3/APLN/HPGD/AKR1B1/FGF2/NDRG2/TNF/ITGA2/CALCRL/IL6/MIR214/TNFAIP3/KLF4/IFNG/APOD 40

BP GO:0006694 steroid biosynthetic process 45/2416 190/18862 2.67011038912653e-05 0.00033787384117185 0.000235413688347395 OSBPL1A/AMACR/HMGCS2/HSD3B2/ACOX2/ACOT8/DHRS11/ABCB11/HSD17B2/IGFBP7/PPARGC1A/OSBPL3/ADM/SDR42E1/CH25H/NR1H4/ACAA2/CLCN2/CYP27A1/PBX1/DGKQ/SCD/SRD5A3/HSD17B3/EGR1/HSD17B11/FDX1/SCAP/HSD11B1/CYP3A4/BMP5/CYP27B1/AKR1B1/HSD17B8/CYB5R2/SRD5A1/HSD11B2/TNF/HINT2/SLC27A2/HMGCR/IFNG/AKR1C3/STARD4/SNAI2 45

BP GO:1904996 positive regulation of leukocyte adhesion to vascular endothelial cell 11/2416 22/18862 2.69901434856913e-05 0.000340807744014238 0.00023745788593009 SELP/ICAM1/ITGB2/MIR21/PTAFR/ETS1/ITGA4/TNF/ST3GAL4/SELE/IL6 11

BP GO:0002686 negative regulation of leukocyte migration 17/2416 46/18862 2.79442268934632e-05 0.000352109074598395 0.000245332091008595 GREM1/PADI2/CCL2/IL33/HOXA7/SLAMF8/ADA/MMP28/CCL21/IL27RA/WASL/MIF/BMP5/CD300A/APOD/STAP1/CXCL12 17

BP GO:0030168 platelet activation 39/2416 157/18862 2.8851928856134e-05 0.000362779527389365 0.000252766731817563 PDPN/LYN/GNA15/SELP/COL1A2/CD40/FYN/UBASH3B/F2RL2/VAV3/SLC7A11/PF4/THBD/LCP2/VAV1/COL3A1/P2RY1/DGKQ/PLEK/STXBP1/ITPR1/FCER1G/LCK/GNA11/VWF/PIK3R5/COL1A1/PEAR1/PLCG2/PRKCH/PRKCQ/PTPN6/FLNA/FERMT3/IL6/FN1/MYL9/TLR4/SH2B3 39

BP GO:0030324 lung development 40/2416 163/18862 3.10018506993199e-05 0.000388991642458836 0.000271030029936437 SLC23A1/CHI3L1/FGFR2/MMP12/PDPN/EDN2/ABCA12/CTSH/LAMA1/TMEM38B/HOXA5/SPARC/TNC/PDGFRB/SLC7A11/HEG1/IGFBP5/MME/ZFPM2/CEBPA/ADA/HSD11B1/FGF9/ALDH1A2/GATA6/RCN3/ESRP2/THRB/FGF2/PKDCC/MMP14/TNF/FBXW7/WNT5A/LIF/GRHL2/FOXF1/WNT2/ERRFI1/LAMA5 40

BP GO:0002702 positive regulation of production of molecular mediator of immune response 28/2416 99/18862 3.19207016566682e-05 0.000397658051415033 0.000277068352672608 IL1B/SLC7A5/CD40/NOD2/XBP1/LILRB1/LAPTM5/PTPRC/IL33/CD74/SASH3/IL18R1/FZD5/CLCF1/MALT1/MAD2L2/IL1R1/NR4A3/CD36/MAVS/CD160/TNFSF13/DDX21/WNT5A/IL6/F2RL1/TLR4/KLK7 28

BP GO:0060562 epithelial tube morphogenesis 65/2416 309/18862 3.19711163650446e-05 0.000397658051415033 0.000277068352672608 FGFR2/COL4A1/HIF1A/CCL11/GREM1/EOMES/CTSH/LAMA1/ADM/HOXA5/ITGAX/MIR21/TWIST1/TACSTD2/TNC/CXCL10/PBX1/EDN1/HES5/COBL/CTHRC1/TIE1/MTHFD1L/OVOL2/AGT/PODXL/LEF1/PLXND1/EDNRA/BMP7/KDR/TULP3/SEMA3E/CXCR4/IHH/RASIP1/EPHA2/CSF1R/SOX17/BMP5/SHROOM3/ESRP2/PIK3CD/SPINT1/CLIC4/FGF2/PRKACB/MMP14/ENG/NRARP/TNF/HOXB7/WNT5A/DCHS1/PKD2/ADAMTS12/WNK4/DDR1/GRHL2/SOSTDC1/FOXF1/SFRP2/WNT2/LAMA5/OSR1 65

BP GO:0002313 mature B cell differentiation involved in immune response 12/2416 26/18862 3.21595940909473e-05 0.000397658051415033 0.000277068352672608 GPR183/XBP1/DOCK11/CR1/ST3GAL1/ADA/FCGR2B/POU2AF1/LGALS1/PLCG2/IL6/ITM2A 12

BP GO:0034114 regulation of heterotypic cell-cell adhesion 12/2416 26/18862 3.21595940909473e-05 0.000397658051415033 0.000277068352672608 GCNT2/THY1/IL1B/CD44/IL1RN/CEACAM6/BMP7/LCK/TNF/MYADM/SKAP1/KLF4 12

BP GO:0061082 myeloid leukocyte cytokine production 12/2416 26/18862 3.21595940909473e-05 0.000397658051415033 0.000277068352672608 IRAK3/LILRB1/LAPTM5/CD74/NR4A3/CD36/MAVS/BCL6/DDX21/WNT5A/TLR4/CHGA 12

BP GO:0061437 renal system vasculature development 12/2416 26/18862 3.21595940909473e-05 0.000397658051415033 0.000277068352672608 PECAM1/ANGPT2/CFLAR/PDGFRB/CD34/TEK/BMP7/EGR1/GPR4/SERPINB7/PKD2/OSR1 12

BP GO:0061440 kidney vasculature development 12/2416 26/18862 3.21595940909473e-05 0.000397658051415033 0.000277068352672608 PECAM1/ANGPT2/CFLAR/PDGFRB/CD34/TEK/BMP7/EGR1/GPR4/SERPINB7/PKD2/OSR1 12

BP GO:0019724 B cell mediated immunity 51/2416 226/18862 3.27104080101197e-05 0.000402173569931557 0.000280214541395265 CD55/C2/C4BPB/IGKC/SERPING1/HLA-DRB1/C3/CD40/C1R/IGLV2-23/IGLV3-19/NOD2/IGHM/PTPRC/IGLV1-44/CD74/TRBC1/IL13RA2/CCR6/CFI/C1S/CR1/BTK/IGLV6-57/CLU/C4BPA/CD27/FCER1G/IGHG1/CLCF1/FCGR2B/MAD2L2/IGKV3-20/IGKV4-1/IL27RA/IGHV1-69/TNFSF13/CD19/LTA/BCL6/SWAP70/BATF/TLR8/TNF/PTPN6/IGHD/IGKV1-5/CR2/HLA-DQB1/GAPT/TCIRG1 51

BP GO:0032653 regulation of interleukin-10 production 20/2416 60/18862 3.27272116471149e-05 0.000402173569931557 0.000280214541395265 IDO1/HLA-DRB1/TRIB2/NOD2/LILRB1/CD274/CD34/SASH3/TIGIT/STAT3/CD83/FCGR2B/HGF/TLR2/LILRB4/IL23A/TYROBP/IRF4/IL6/TLR4 20

BP GO:0032722 positive regulation of chemokine production 20/2416 60/18862 3.27272116471149e-05 0.000402173569931557 0.000280214541395265 HIF1A/IL1B/NOD2/TWIST1/IL33/CD74/RIPK2/EGR1/TLR2/AIF1/CSF1R/MAVS/LPL/MCOLN2/TNF/WNT5A/IL6/IFNG/ADCYAP1/TLR4 20

BP GO:0034754 cellular hormone metabolic process 35/2416 136/18862 3.29175177250726e-05 0.000403679846998833 0.000281264040340939 HSD3B2/SDR16C5/DHRS11/HSD17B2/RDH5/PPARGC1A/ADM/ADH6/RETSAT/CLCN2/SULT1A1/DGKQ/SRD5A3/UGT2B15/ADH1C/HSD17B3/EGR1/HSD17B11/FDX1/ALDH1A2/CYP3A4/BMP5/AKR1B10/AKR1B1/HSD17B8/TTR/SPP1/SRD5A1/CYP27C1/CYP2S1/AKR1C3/UGT2B17/ALDH1A3/CYP2C9/ALDH1A1 35

BP GO:0006882 cellular zinc ion homeostasis 15/2416 38/18862 3.33630358781135e-05 0.000407466585724501 0.000283902451551247 S100A8/MT3/S100A9/SLC39A5/SLC30A10/MT1G/MT1F/MT1M/SLC39A4/MT1E/LCK/MT1X/MT2A/SLC1A1/SLC30A1 15

BP GO:0030866 cortical actin cytoskeleton organization 15/2416 38/18862 3.33630358781135e-05 0.000407466585724501 0.000283902451551247 EPB41L1/VIL1/EPB41L3/EPB41L2/CALR/LCP1/PLEK/RAB13/FMNL1/FMNL3/NCKAP1L/RHOQ/EHD2/LLGL2/TNF 15

BP GO:0051924 regulation of calcium ion transport 53/2416 238/18862 3.40099017119202e-05 0.000414517411458168 0.000288815116249112 CXCL9/THY1/LYN/SRI/SPHK2/LILRB2/SESTD1/CX3CL1/TMEM38B/ICAM1/CCL2/LILRB1/FYN/GJA1/EHD3/MIR21/UBASH3B/KCNE2/PDGFRB/APLNR/CXCL10/CXCL11/HPCA/PDE4B/RAMP3/GEM/CORO1A/CCL4/CLIC2/STC1/CAV1/HOMER1/P2RX5/CXCR4/GNAI2/FCRL3/RGS4/TMEM38A/WFS1/PLCG2/CD19/LILRA2/CCR1/P2RX4/CACNA1D/PTPN6/PKD2/SEMG1/SLC30A1/DHRS7C/CD33/GPR35/CXCL12 53

BP GO:0009410 response to xenobiotic stimulus 34/2416 131/18862 3.51227756173139e-05 0.000427207638120797 0.000297657035038245 CYP2B6/UGT1A6/CBR3/SULT1A2/CMBL/ACAA1/SULT1A1/NQO2/BPHL/UGT2B28/HNF4A/CES2/UGT2B15/NR1I2/S100A12/GSTM4/CYP3A4/CES3/CYP2J2/NAT2/GSTA1/SULT1B1/CYP2S1/EPHX1/ACSL1/GSTO2/PON3/AKR7A3/NAT1/MGST1/HSP90AB1/CYP2C9/AHR/FMO1 34

BP GO:0060760 positive regulation of response to cytokine stimulus 19/2416 56/18862 3.87348146319313e-05 0.000470182271295949 0.000327599622088046 MMP12/CASP1/CASP4/PARP9/HIF1A/ZBP1/LAPTM5/CD74/EDN1/RIPK2/CXCR4/TLR2/IL1R1/MAVS/CD300LF/NLRC5/PARP14/WNT5A/TLR4 19

BP GO:0010951 negative regulation of endopeptidase activity 54/2416 245/18862 3.88674810763852e-05 0.000470833713852145 0.000328053514861659 TIMP1/PI3/COL6A3/IFI16/SERPINB5/SERPINA1/MMP9/LAMP3/SERPINA3/SERPING1/C3/SPINK2/SERPINB9/MT3/TNFAIP8/CST7/CD44/VIL1/PLAUR/TFPI/SERPINA6/TIMP3/CR1/AGT/SERPINF1/CD27/HERPUD1/SPINK5/HGF/CSTA/SLPI/SERPINI1/LTF/SPOCK2/PAPLN/SERPINB7/NLRP7/SPINT1/CARD8/BST2/FABP1/SERPINH1/TNF/TIMP2/SPINK4/SH3RF1/SERPINE1/AQP1/KLF4/SERPINB3/COL7A1/TFPI2/PCSK1N/SFRP2 54

BP GO:0036293 response to decreased oxygen levels 73/2416 360/18862 3.92624609462199e-05 0.000474653686084119 0.000330715081526289 VCAM1/CASP1/PSMB9/HIF1A/RAMP2/PPARGC1A/ADM/NDRG1/MT3/HSP90B1/ICAM1/PCK1/VEGFC/MIR21/TWIST1/ACAA2/ANGPT2/FAM162A/PAM/PLAU/CFLAR/ALAD/CD34/DDIT4/TEK/REG1A/HIGD1A/CD38/EDN1/AQP3/HYOU1/EEF2K/NOS2/PINK1/AGTRAP/ADA/STC1/CAV1/EDNRA/ITPR1/BMP7/ETS1/UCP2/EGR1/CXCR4/P4HB/PLOD1/PSMB8/SOD2/SCAP/TLR2/GATA6/PTGS2/LTA/MMP14/FABP1/PMAIP1/APOLD1/NR4A2/CPEB4/HSD11B2/ITGA2/CAT/PDK1/MIR214/SLC1A1/BNIP3/AQP1/ENDOG/SOD3/PSMA8/CXCL12/CLCA1 73

BP GO:1905039 carboxylic acid transmembrane transport 38/2416 154/18862 4.24869661864698e-05 0.000512595786379271 0.000357151249958712 SLC6A14/SLC23A1/SLC38A4/SLC16A1/SFXN1/ABCB1/SLC36A1/PDPN/CPT1A/SLC3A1/SLC25A20/CPT2/RGS2/SLC7A5/LRRC8C/SFXN3/SLC6A20/AQP9/EMB/SLC7A11/SLC6A19/SLC7A7/PRAF2/SLC6A6/SLC16A2/SLC22A4/ABCC1/SLC1A3/RGS4/SLC1A4/ABCD3/CD36/KCNJ10/SLC13A2/SLC25A10/SLC1A1/ACSL1/SLC25A32 38

BP GO:0030033 microvillus assembly 9/2416 16/18862 4.47543516301893e-05 0.000535614328746844 0.000373189425451483 PLD1/ESPN/FSCN1/SLC9A3R1/FXYD5/PODXL/TNIK/RAP1GAP/MYO1A 9

BP GO:0034116 positive regulation of heterotypic cell-cell adhesion 9/2416 16/18862 4.47543516301893e-05 0.000535614328746844 0.000373189425451483 GCNT2/THY1/IL1B/CD44/CEACAM6/BMP7/LCK/TNF/SKAP1 9

BP GO:0045591 positive regulation of regulatory T cell differentiation 9/2416 16/18862 4.47543516301893e-05 0.000535614328746844 0.000373189425451483 HLA-DRB1/LILRB2/SOCS1/HLA-DRA/CR1/DUSP10/LILRB4/BCL6/IFNG 9

BP GO:0061081 positive regulation of myeloid leukocyte cytokine production involved in immune response 9/2416 16/18862 4.47543516301893e-05 0.000535614328746844 0.000373189425451483 LILRB1/LAPTM5/CD74/NR4A3/CD36/MAVS/DDX21/WNT5A/TLR4 9

BP GO:0002711 positive regulation of T cell mediated immunity 18/2416 52/18862 4.54247404674281e-05 0.000542548002376496 0.000378020464389841 HLA-DRB1/IL1B/PTPRC/MR1/SASH3/HLA-DRA/IL18R1/FZD5/IL12RB1/MALT1/CD1C/IL1R1/IL23A/CD1D/IL6/CD1A/AZGP1/CD1B 18

BP GO:1901222 regulation of NIK/NF-kappaB signaling 29/2416 106/18862 4.57115708673431e-05 0.000544881924738729 0.000379646625414039 IL1B/GREM1/ZC3H12A/NOD2/MIR21/LAPTM5/CD86/IL18R1/PDCD4/EDN1/CALR/LRRC19/BMP7/CD27/NMI/PTP4A3/TLR2/CCL19/RASSF2/IL23A/NR3C2/NLRC3/SPHK1/CD14/TNF/NFKBIA/TSPAN6/IFI35/TLR4 29

BP GO:0001885 endothelial cell development 21/2416 66/18862 4.6084126639537e-05 0.000547134252533148 0.000381215935401496 MSN/PECAM1/IL1B/TNMD/ICAM1/COL15A1/HEG1/CLDN1/CDH5/PPP1R16B/STC1/COL18A1/CLIC4/ROBO4/S1PR3/ENG/TNF/MYADM/TJP3/F2RL1/MARVELD2 21

BP GO:0045600 positive regulation of fat cell differentiation 21/2416 66/18862 4.6084126639537e-05 0.000547134252533148 0.000381215935401496 ZC3H12A/PPARG/XBP1/MIR21/VSTM2A/CEBPB/RARRES2/CEBPA/CCDC3/BMP7/ZBTB7C/PTGS2/LPL/NAPEPLD/TRPM4/ZFP36/CDS1/ZNF385A/FRZB/SFRP2/TPH1 21

BP GO:0010959 regulation of metal ion transport 54/2416 247/18862 4.90757418286487e-05 0.000581493879321563 0.000405156014469015 CXCL9/THY1/LYN/SRI/SPHK2/LILRB2/SESTD1/CX3CL1/TMEM38B/ICAM1/CCL2/SLC30A10/LILRB1/FYN/GJA1/EHD3/MIR21/UBASH3B/KCNE2/PDGFRB/APLNR/CXCL10/CXCL11/HPCA/PDE4B/RAMP3/GEM/CORO1A/CCL4/CLIC2/STC1/CAV1/HOMER1/P2RX5/CXCR4/GNAI2/FCRL3/RGS4/TMEM38A/WFS1/PLCG2/CD19/LILRA2/CCR1/P2RX4/CACNA1D/PTPN6/PKD2/SEMG1/SLC30A1/DHRS7C/CD33/GPR35/CXCL12 54

BP GO:1903825 organic acid transmembrane transport 38/2416 155/18862 4.94363176043452e-05 0.000584604073257733 0.000407323042918007 SLC6A14/SLC23A1/SLC38A4/SLC16A1/SFXN1/ABCB1/SLC36A1/PDPN/CPT1A/SLC3A1/SLC25A20/CPT2/RGS2/SLC7A5/LRRC8C/SFXN3/SLC6A20/AQP9/EMB/SLC7A11/SLC6A19/SLC7A7/PRAF2/SLC6A6/SLC16A2/SLC22A4/ABCC1/SLC1A3/RGS4/SLC1A4/ABCD3/CD36/KCNJ10/SLC13A2/SLC25A10/SLC1A1/ACSL1/SLC25A32 38

BP GO:0007492 endoderm development 23/2416 76/18862 4.98021248486174e-05 0.000587763691282693 0.000409524507613957 DUSP4/ITGA5/MMP9/EOMES/LAMC1/EPB41L5/COL5A2/ITGB2/COL4A2/GATA6/LAMB1/SOX17/COL12A1/NANOG/MMP14/COL5A1/ITGAV/ITGA4/INHBA/FN1/KIF16B/COL7A1/DKK1 23

BP GO:0002921 negative regulation of humoral immune response 8/2416 13/18862 5.06369247041904e-05 0.000594457562060521 0.000414188463851776 CD55/C4BPB/SERPING1/CR1/C4BPA/SPINK5/FCGR2B/PTPN6 8

BP GO:0032530 regulation of microvillus organization 8/2416 13/18862 5.06369247041904e-05 0.000594457562060521 0.000414188463851776 PLD1/VIL1/FSCN1/PODXL/CDHR5/RAP1GAP/USH1C/CDHR2 8

BP GO:0071248 cellular response to metal ion 44/2416 189/18862 5.06685304575075e-05 0.000594457562060521 0.000414188463851776 HSPA5/MMP9/ANK3/PPARGC1A/MT3/SLC41A1/SLC30A10/CHP2/SLC25A23/MT1G/SYT11/ALAD/HPCA/CLDN1/MT1F/JUNB/EDN1/MT1M/SYT17/CALR/EEF2K/CEBPA/SERPINF1/MT1E/LRRK2/MT1X/CLIC4/CPNE2/MT2A/P2RX4/FOS/WNT5A/HVCN1/PKD2/CPNE5/RASGRP2/BNIP3/AQP1/ENDOG/AKR1C3/FABP4/SYT13/FOSB/ALOX5AP 44

BP GO:0002675 positive regulation of acute inflammatory response 12/2416 27/18862 5.11524905930557e-05 0.000594614442120952 0.000414297770075443 C2CD4A/IL1B/C3/OSMR/C2CD4B/BTK/CCR7/PTGS2/TNFSF11/TNF/IL6/OSM 12

BP GO:0036037 CD8-positive, alpha-beta T cell activation 12/2416 27/18862 5.11524905930557e-05 0.000594614442120952 0.000414297770075443 EOMES/LILRB1/IRF1/SOCS1/CD274/TNFSF8/NCKAP1L/CLEC4A/RUNX3/LILRB4/CRTAM/SH3RF1 12

BP GO:0071624 positive regulation of granulocyte chemotaxis 12/2416 27/18862 5.11524905930557e-05 0.000594614442120952 0.000414297770075443 RAC2/CD74/EDN1/DAPK2/CCL21/NCKAP1L/CCL19/CCR7/IL23A/C3AR1/C5AR1/S100A7 12

BP GO:0090025 regulation of monocyte chemotaxis 12/2416 27/18862 5.11524905930557e-05 0.000594614442120952 0.000414297770075443 LYN/GREM1/CXCL10/SLAMF8/PLA2G7/CXCL17/AIF1/CCR1/SERPINE1/S100A7/FPR2/CXCL12 12

BP GO:0043551 regulation of phosphatidylinositol 3-kinase activity 19/2416 57/18862 5.11807397328941e-05 0.000594614442120952 0.000414297770075443 LYN/FGR/PIK3R3/FGFR3/IRS1/NOD2/SOCS3/SOCS1/VAV3/PDGFRB/TEK/PIK3R5/CCL21/CCL19/CCR7/CD19/FGF2/KLF4/FPR2 19

BP GO:0007431 salivary gland development 13/2416 31/18862 5.26119480894895e-05 0.000607117131278189 0.000423009022058011 FGFR2/TGM2/TWSG1/LAMA1/CLCN2/PLXND1/BMP7/HGF/ESRP2/TNF/TFCP2L1/NTN4/LAMA5 13

BP GO:0042044 fluid transport 13/2416 31/18862 5.26119480894895e-05 0.000607117131278189 0.000423009022058011 AQP7/AQP8/PDZD3/AQP11/AQP9/EDN1/AQP3/ITPR1/HYAL2/SLC4A11/SLC5A1/AQP1/SCNN1B 13

BP GO:0001913 T cell mediated cytotoxicity 17/2416 48/18862 5.26643551796684e-05 0.000607117131278189 0.000423009022058011 HLA-DRB1/CTSH/CTSC/LILRB1/PTPRC/MR1/IL7R/HLA-DRA/IL12RB1/FCGR2B/CD1C/IL23A/PRF1/CD1D/CD1A/AZGP1/CD1B 17

BP GO:0043090 amino acid import 17/2416 48/18862 5.26643551796684e-05 0.000607117131278189 0.000423009022058011 SLC6A14/SFXN1/SLC36A1/RGS2/SLC7A5/SFXN3/SLC6A20/SLC9A3R1/SLC7A11/SLC6A6/SLC16A2/SLC22A4/SLC1A3/RGS4/SLC1A4/KCNJ10/SLC1A1 17

BP GO:0042180 cellular ketone metabolic process 55/2416 254/18862 5.53892758005271e-05 0.000637297459017647 0.000444037173405973 PDK2/CYP2B6/CPT1A/PSMB9/KYNU/CYP4F2/IDO1/ABCB11/IL1B/ANXA1/CBR3/PPARGC1A/ADM/IRS1/PPARG/NR1H4/LPGAT1/MIR21/TWIST1/TDO2/FABP3/CYP4F12/MLYCD/CLCN2/OAZ2/SLC7A11/CD74/SLC7A7/DGKQ/APPL2/KMO/COQ9/COQ3/CAV1/COQ5/HSD17B3/EGR1/PDK4/PSMB8/SCAP/NR4A3/PDP1/BMP5/AKR1B10/PTGS2/AKR1B1/FABP1/SRD5A1/APOC1/APOC2/PDK1/AKR1C3/IDO2/STARD4/PSMA8 55

BP GO:0009150 purine ribonucleotide metabolic process 80/2416 408/18862 5.82077364422273e-05 0.000668435663190124 0.000465732725412406 ACSF2/SEC13/ENPP1/PDK2/HMGCS2/ACOT8/HIF1A/KYNU/PDE8A/PFKFB3/SLC26A2/ENTPD5/SPHK2/PPARGC1A/CROT/ACAT1/PGM2L1/SULT1A2/PGM1/GIMAP7/ACOT11/TDO2/PDHA1/PDE4C/ACOT4/INSR/BPNT1/MLYCD/HMGCL/AK3/SULT1A1/PPT1/DDIT4/PDE4B/ADCY3/AMPD1/ACSS2/PANK3/ACOT9/TPST2/SCD/SUCLG2/PINK1/PANK1/PFKFB2/VCP/SLC4A4/MAGI3/PDK4/ACSL4/TPST1/SLC2A6/RHOQ/NME1/PAPSS2/OGDHL/EPHA2/LRRK2/PDP1/PAPSS1/FAR2/HSD17B8/ACOT13/ADCY6/SULT1B1/GUCY2C/HMGCR/ADCY4/PDK1/NUP210/ENO2/IFNG/ACSL1/ALDOB/ACSM3/PDE9A/SULT1C2/H19/XDH/PTHLH 80

BP GO:1903793 positive regulation of anion transport 91/2416 478/18862 5.91013136704354e-05 0.000677391979761144 0.000471973041356007 S100A8/ABCB1/RHOU/OPN3/ABCA12/SRI/HIF1A/CYP4F2/ABCB11/PCK2/HLA-DRB1/IL1B/C3/ANK3/HCLS1/ZC3H12A/IRS1/ITGB2/NR1H4/CHP2/FYN/GJA1/VEGFC/PTAFR/GZMB/ABCA8/ATP8A1/FABP3/BAG3/INSR/RAC2/CAMK2N1/OAZ2/HPCA/OSBPL8/PPID/STOM/CD38/EDN1/CEBPB/FZD5/JAK2/KMO/PINK1/PTGES/PFKFB2/CAV1/STXBP1/PRR5L/HYAL2/ACSL4/EXPH5/MYH10/RHOQ/TLR2/LIPG/PPP3CC/NR4A3/APLN/MAVS/IL1A/CA2/RAB8B/CETP/OCLN/TNFSF11/ILDR1/PMAIP1/SPP1/PDZK1/CNST/P2RX4/TNF/FBXW7/TRPM4/NFKBIA/FLNA/ADAM9/F2RL1/IFNG/ACSL1/ADCYAP1/TLR4/VSNL1/CD33/HSP90AB1/ABCB4/MAP2K6/CXCL12/EDEM1/NMU 91

BP GO:0048762 mesenchymal cell differentiation 51/2416 231/18862 6.00248977857486e-05 0.000686657180044264 0.000478428572107846 GCNT2/SEMA5A/FGFR2/PITX2/PDPN/PBLD/HIF1A/IL1B/GREM1/OLFM1/EOMES/FERMT2/EPB41L5/STAT1/EFNA1/MIR21/TWIST1/SEMA4A/PDCD4/EDN1/S100A4/EDN3/OVOL2/LEF1/SEMA6A/EDNRA/SEMA4D/BMP7/SEMA3E/COL1A1/WWTR1/HGF/MAD2L2/ALDH1A2/BMP5/SMAD7/ENG/SEMA6D/FLNA/WNT5A/NRG1/IL6/FN1/SERPINB3/FRZB/BAMBI/SFRP2/WNT2/LAMA5/SNAI2/OSR1 51

BP GO:0045861 negative regulation of proteolysis 70/2416 346/18862 6.04142622988663e-05 0.00068978736264606 0.000480609527664908 TIMP1/PI3/COL6A3/IFI16/SERPINB5/SERPINA1/MMP9/LAMP3/SERPINA3/SERPING1/C3/SPINK2/SERPINB9/MT3/AQP11/TNFAIP8/CST7/CD44/EFNA1/VIL1/CAMK2N1/ALAD/PLAUR/TFPI/SERPINA6/TIMP3/CR1/AGT/SERPINF1/CHAC1/CD27/HERPUD1/SPINK5/FHIT/HGF/CSTA/SLPI/SERPINI1/LTF/SPOCK2/PAPLN/LRRK2/SERPINB7/NLRP7/SPINT1/CARD8/BST2/FABP1/SERPINH1/TMEM98/GLG1/TNF/ECM1/TIMP2/PTPN3/SPINK4/MTM1/SH3RF1/SERPINE1/AQP1/KLF4/GAS1/SERPINB3/COL7A1/TFPI2/PCSK1N/IL1R2/HSP90AB1/SFRP2/TM4SF20 70

BP GO:0150104 transport across blood-brain barrier 25/2416 87/18862 6.22796049325466e-05 0.000709725517013341 0.000494501442002408 SLC16A1/ABCB1/ABCG2/SLC22A5/SLC7A5/KCNJ8/SLC6A20/ATP8A1/INSR/SLC9A3R1/SLC2A3/SLC44A1/SLC24A3/SLC6A6/SLC16A2/SLC4A4/ABCC1/SLC1A3/SLC1A4/CD36/SLC27A4/ABCC3/SLC5A1/SLC1A1/SLC15A2 25

BP GO:0034121 regulation of toll-like receptor signaling pathway 23/2416 77/18862 6.24956144794819e-05 0.000710827981484183 0.000495269584414536 IRAK3/LYN/BIRC3/NOD2/IRF1/APPL2/CAV1/LY96/TLR2/FCRL3/LTF/TLR1/CD36/IRF4/LILRA2/CD300LF/CD300A/CD14/IFI35/F2RL1/TNFAIP3/GRAMD4/TLR4 23

BP GO:0030282 bone mineralization 30/2416 113/18862 6.2923651259327e-05 0.000714333260010645 0.000497711888156481 ANKH/ENPP1/FGFR2/HIF1A/FGR/SNX10/GREM1/COL1A2/FGFR3/ACVR2A/TMEM38B/TWIST1/MGP/SLC24A3/BMP7/DDR2/S1PR1/LTF/SRGN/CYP27B1/PKDCC/CCR1/TUFT1/ISG15/TRPM4/ECM1/MINPP1/TMEM119/PTHLH/OSR1 30

BP GO:0060445 branching involved in salivary gland morphogenesis 10/2416 20/18862 6.33661173276132e-05 0.000716626298429933 0.000499309563282601 FGFR2/TGM2/LAMA1/PLXND1/BMP7/HGF/ESRP2/TNF/NTN4/LAMA5 10

BP GO:0060713 labyrinthine layer morphogenesis 10/2416 20/18862 6.33661173276132e-05 0.000716626298429933 0.000499309563282601 FGFR2/ADM/SOCS3/FZD5/RSPO3/LEF1/BMP7/BMP5/SPINT1/GRHL2 10

BP GO:0019884 antigen processing and presentation of exogenous antigen 43/2416 185/18862 6.37886039459056e-05 0.000720038029389389 0.000501686687732452 OSBPL1A/SEC13/HLA-DMA/SEC24D/TAP2/PSMB9/HLA-DRB1/TAP1/IFI30/NCF2/CTSE/SEC24A/MR1/CD74/HLA-DRA/KIFAP3/FCGR1B/HLA-DMB/CALR/HLA-DOB/NCF4/FCER1G/RILP/PSMB8/FCGR2B/CLEC4A/CD1C/CD36/HLA-DPA1/FCGR1A/SH3GL2/ITGAV/HLA-DPB1/CD1D/LAG3/CD207/CD1A/SEC24C/AP1M2/CD1B/HLA-DQB1/PSMA8/HLA-DQA1 43

BP GO:0006633 fatty acid biosynthetic process 40/2416 168/18862 6.42718181947671e-05 0.000724121051872991 0.000504531534729592 LIPC/EDN2/IL1B/TBXAS1/ANXA1/FADS1/DEGS1/XBP1/LPGAT1/ACOT4/MLYCD/CD74/PECR/DECR2/EDN1/ACSS2/SCD/PTGDS/PTGES/EPHX2/PDK4/GSTM4/SCAP/LIPG/CYP3A4/ABCD3/MIF/ABHD3/PTGS2/LPL/MGLL/HPGD/HPGDS/HSD17B8/FADS3/APOC1/APOC2/AKR1C3/ACSM3/CYP2C9 40

BP GO:0071900 regulation of protein serine/threonine kinase activity 93/2416 492/18862 6.48530765798475e-05 0.000729291200784701 0.000508133837353522 IRAK3/PEA15/CCNJL/DUSP4/THY1/LYN/MAP3K5/IL1B/RGS2/TRIB2/FERMT2/PLCE1/CD40/MAPRE3/PKIB/CDKN2B/LAX1/NOD2/FPR1/TGFA/ROBO1/PTPRC/INSR/MLKL/PDGFRB/PROK2/CD74/CXCL10/DNAJA1/HEG1/PDCD4/EDN1/PKIA/MAPKAPK2/FZD5/EDN3/AGT/CCNO/CEBPA/RIPK2/RASGRP1/DUSP14/DUSP21/CAV1/HYAL2/BMP7/S100A12/FAM20A/CBLC/CXCR4/TNIK/PIK3R5/RASIP1/HGF/DUSP10/AVPI1/CXCL17/CCL19/RGS4/LTF/MAP4K1/LRRK2/CSF1R/HHEX/PKN1/FGF2/TNFSF11/CD300A/TNF/C5AR1/PTPN6/BLM/WNT5A/GHR/PKD2/NRG1/PRKAR2B/FZD10/MUC20/TNFAIP3/IFNG/ACSL1/SERPINB3/TLR4/SH2B3/TCL1A/ADORA2B/PRKAR1A/MST1/HSP90AB1/SFRP2/MAP2K6/DKK1 93

BP GO:0062197 cellular response to chemical stress 70/2416 347/18862 6.63829079411845e-05 0.000745088759565838 0.000519140790619433 MMP3/GPX8/VNN1/PDK2/MMP9/MAP3K5/HIF1A/PDE8A/ANXA1/ZC3H12A/PPARGC1A/NCF2/MT3/LRRC8C/PRDX6/PPARG/FYN/SLC25A23/MIR21/SIRPA/CFLAR/SLC7A11/DNAJA1/JAK2/PINK1/BTK/NCF4/CAV1/PRR5L/BMP7/ETS1/GPX7/P4HB/FUT8/ERMP1/SOD2/HGF/CYCS/AIF1/LRRK2/NR4A3/CD36/FBLN5/AKR1B1/GJB2/FABP1/NR4A2/SPHK1/RCSD1/FBXW7/FOS/PKD2/IL6/CAT/PDK1/IL18RAP/TNFAIP3/SLC1A1/NET1/BNIP3/AQP1/KLF4/ENDOG/AKR1C3/GPX2/SOD3/TLR4/MGST1/H19/ERRFI1 70

BP GO:0050732 negative regulation of peptidyl-tyrosine phosphorylation 19/2416 58/18862 6.70523043416332e-05 0.000751187469691981 0.000523390068515518 THY1/SH3BP5/SOCS3/SOCS1/PTPRC/CAV1/SEMA4D/HYAL2/SAMSN1/CBLC/PTK6/LILRB4/DUSP22/CD300A/PARP14/PTPN6/SH2B3/SFRP2/ERRFI1 19

BP GO:0030890 positive regulation of B cell proliferation 15/2416 40/18862 6.75100076430784e-05 0.000752074103836911 0.000524007831090889 CD40/GPR183/PTPRC/TNFSF13B/VAV3/CD74/SASH3/CD38/ADA/CLCF1/NCKAP1L/FCRL3/MIF/BCL6/TLR4 15

BP GO:0032735 positive regulation of interleukin-12 production 15/2416 40/18862 6.75100076430784e-05 0.000752074103836911 0.000524007831090889 IDO1/CD40/NOD2/LAPTM5/IRF1/RIPK2/TLR2/CCL19/CCR7/CD36/IL23A/LTB/IFNG/IRF8/TLR4 15

BP GO:0055069 zinc ion homeostasis 15/2416 40/18862 6.75100076430784e-05 0.000752074103836911 0.000524007831090889 S100A8/MT3/S100A9/SLC39A5/SLC30A10/MT1G/MT1F/MT1M/SLC39A4/MT1E/LCK/MT1X/MT2A/SLC1A1/SLC30A1 15

BP GO:0016525 negative regulation of angiogenesis 36/2416 146/18862 6.78089787979052e-05 0.000753995361260289 0.000525346467709615 ECSCR/TNMD/SULF1/STAT1/PPARG/ADAMTS9/HOXA5/ADAMTS1/MIR21/ANGPT2/SPARC/SEMA4A/PF4/CXCL10/PLK2/TEK/KLK3/THBS2/TIE1/APOH/SERPINF1/SEMA6A/SEMA3E/COL4A2/PTPRM/SPINK5/FOXO4/EPHA2/DCN/CD160/GPR4/HHEX/TNF/SERPINE1/MIR214/KLF4 36

BP GO:0032637 interleukin-8 production 28/2416 103/18862 6.93958790988892e-05 0.000770203797820074 0.00053663970017665 CHI3L1/IL1B/ANXA1/NOD2/PTPRC/AFAP1L2/F3/CD74/CD2/LRRC19/NOS2/STAT3/FCN1/HYAL2/TLR2/TLR1/MAVS/LILRA2/TLR8/CD14/TNF/WNT5A/IL6/SERPINE1/F2RL1/KLF4/TLR4/CD33 28

BP GO:0051208 sequestering of calcium ion 31/2416 119/18862 7.06905665528498e-05 0.000783114826496255 0.000545635462827221 CXCL9/THY1/LYN/SRI/CX3CL1/TMEM38B/HSP90B1/SLC25A23/UBASH3B/PTPRC/APLNR/CXCL10/CXCL11/CORO1A/CALR/TRPV1/CLIC2/ITPR1/LCK/CCL21/CCL19/CCR7/TMEM38A/PLCG2/CD19/FGF2/MCOLN2/PTPN6/PKD2/CCR5/DHRS7C 31

BP GO:0001961 positive regulation of cytokine-mediated signaling pathway 17/2416 49/18862 7.10884555354145e-05 0.000786061586254305 0.00054768861846931 MMP12/CASP1/CASP4/PARP9/HIF1A/ZBP1/LAPTM5/CD74/EDN1/RIPK2/CXCR4/IL1R1/MAVS/CD300LF/NLRC5/PARP14/WNT5A 17

BP GO:0001666 response to hypoxia 70/2416 348/18862 7.288899573167e-05 0.00080422081888213 0.000560341068613564 VCAM1/CASP1/PSMB9/HIF1A/RAMP2/PPARGC1A/ADM/NDRG1/MT3/HSP90B1/ICAM1/PCK1/VEGFC/MIR21/TWIST1/ACAA2/ANGPT2/FAM162A/PAM/PLAU/CFLAR/ALAD/CD34/DDIT4/TEK/REG1A/HIGD1A/CD38/EDN1/AQP3/HYOU1/NOS2/PINK1/AGTRAP/ADA/STC1/CAV1/EDNRA/ITPR1/BMP7/ETS1/UCP2/EGR1/CXCR4/P4HB/PLOD1/PSMB8/SOD2/SCAP/TLR2/GATA6/PTGS2/LTA/MMP14/FABP1/PMAIP1/APOLD1/NR4A2/HSD11B2/ITGA2/CAT/PDK1/MIR214/BNIP3/AQP1/ENDOG/SOD3/PSMA8/CXCL12/CLCA1 70

BP GO:0006766 vitamin metabolic process 33/2416 130/18862 7.30005810428242e-05 0.00080422081888213 0.000560341068613564 SLC23A1/SLC19A3/VNN1/MTHFD2/ENPP1/CLYBL/CYP4F2/TCN1/TPK1/CYP4F12/VDR/PSAT1/CYP27A1/SLC2A3/RBP2/MTHFD1L/ABCC1/SHMT2/ALDH1A2/VNN2/CYP3A4/CYP27B1/RFK/TNF/IFNG/AKR1C3/GSTO2/ACP5/PRSS3/PRSS1/SLC25A32/SNAI2/AOX1 33

BP GO:0006066 alcohol metabolic process 74/2416 373/18862 7.34535001232469e-05 0.000807717455229799 0.000562777350915146 OSBPL1A/VLDLR/HMGCS2/NAAA/INPP5J/APOL1/PLCD3/SDR16C5/ITPKA/PLCD1/PCK2/IMPA2/SPHK2/RDH5/PLCE1/MT3/IP6K2/SULT1A2/CH25H/NR1H4/PCK1/PTAFR/ACAA2/ADH6/RETSAT/BPNT1/CLCN2/SULT1A1/APOL2/PECR/CYP27A1/ACSS2/P2RY1/DGKQ/SCD/CEBPA/SORD/SRD5A3/PLEK/CHKA/COQ3/FMO5/OCRL/ADH1C/EPHX2/FDX1/SCAP/ALDH1A2/CYP3A4/GOT1/MOGAT2/SPR/BMP5/AKR1B10/GDPD3/PLCG2/CYP27B1/CETP/AKR1B1/FGF2/NAPEPLD/TTR/SPHK1/DEGS2/SULT1B1/CYP27C1/HMGCR/CAT/AKR1C3/MOGAT3/MINPP1/ALDH1A3/CYP2C9/ALDH1A1 74

BP GO:0034599 cellular response to oxidative stress 62/2416 299/18862 7.45689823338272e-05 0.000818311583217108 0.000570158812396943 MMP3/GPX8/VNN1/PDK2/MMP9/MAP3K5/HIF1A/PDE8A/ANXA1/ZC3H12A/PPARGC1A/NCF2/MT3/PRDX6/FYN/MIR21/SIRPA/CFLAR/SLC7A11/JAK2/PINK1/BTK/NCF4/PRR5L/BMP7/ETS1/GPX7/P4HB/FUT8/ERMP1/SOD2/HGF/CYCS/AIF1/LRRK2/NR4A3/CD36/FBLN5/GJB2/FABP1/NR4A2/SPHK1/FBXW7/FOS/PKD2/IL6/CAT/PDK1/IL18RAP/TNFAIP3/SLC1A1/NET1/BNIP3/AQP1/KLF4/ENDOG/AKR1C3/GPX2/SOD3/TLR4/MGST1/H19 62

BP GO:0090023 positive regulation of neutrophil chemotaxis 11/2416 24/18862 7.46915270587427e-05 0.000818311583217108 0.000570158812396943 RAC2/CD74/EDN1/DAPK2/CCL21/NCKAP1L/CCL19/CCR7/IL23A/C3AR1/C5AR1 11

BP GO:1901606 alpha-amino acid catabolic process 25/2416 88/18862 7.65325418174638e-05 0.000836943026113916 0.000583140275171211 TAT/KYNU/CBS/IDO1/GLUL/ACAT1/DDAH2/ASRGL1/DAO/MIR21/OTC/TDO2/KMO/NOS2/DDO/AMT/SHMT2/SDSL/GOT1/ACADSB/ASPA/IL4I1/GPT/IDO2/CRYM 25

BP GO:0010466 negative regulation of peptidase activity 55/2416 257/18862 7.73286637942581e-05 0.000842667611866427 0.000587128881810854 TIMP1/PI3/COL6A3/IFI16/SERPINB5/SERPINA1/MMP9/LAMP3/SERPINA3/SERPING1/C3/SPINK2/SERPINB9/MT3/TNFAIP8/CST7/CD44/VIL1/PLAUR/TFPI/SERPINA6/TIMP3/CR1/AGT/SERPINF1/CD27/HERPUD1/SPINK5/HGF/CSTA/SLPI/SERPINI1/LTF/SPOCK2/PAPLN/SERPINB7/NLRP7/SPINT1/CARD8/BST2/FABP1/SERPINH1/TNF/ECM1/TIMP2/SPINK4/SH3RF1/SERPINE1/AQP1/KLF4/SERPINB3/COL7A1/TFPI2/PCSK1N/SFRP2 55

BP GO:0048608 reproductive structure development 79/2416 405/18862 7.73387892098885e-05 0.000842667611866427 0.000587128881810854 FGFR2/HSPA5/SERPINB5/PLCD3/PRDX4/TEX11/HOXA9/HIF1A/HSD17B2/C3/ANXA1/EOMES/SULF1/ACVR2A/ADM/BSG/PPARG/ICAM1/ADAMTS1/GJA1/SOCS3/TNC/PDGFRB/UTF1/BASP1/HTRA1/VDR/JUNB/CEBPB/FZD5/MME/ZFPM2/RSPO3/OVOL2/MMP19/GJB3/CEBPA/LEF1/SERPINF1/ADA/RAB13/STC1/BMP7/HOXA10/FOSL1/HSD17B3/CDX2/FGF9/SPATA2/TIFAB/GATA6/DCN/ADAM19/BMP5/CYP27B1/SPINT1/TFAP2C/GJB2/MMP14/SPP1/SRD5A1/PTPN6/FLNA/WNT5A/PKD2/LIF/INHBA/NRIP1/AKR1C3/GRHL2/PHLDA2/NDP/ADCYAP1/MGST1/HSP90AB1/SFRP2/HOXB13/WNT2/OSR1 79

BP GO:0090322 regulation of superoxide metabolic process 13/2416 32/18862 7.82598596680113e-05 0.000851147378871072 0.000593037161717834 ITGB2/MIR21/BMP7/GNAI2/CD36/FBLN5/TYROBP/HVCN1/F2RL1/PON3/H19/FPR2/CD177 13

BP GO:0006638 neutral lipid metabolic process 34/2416 136/18862 7.94812335837538e-05 0.000861287549380314 0.000600102328206524 LIPC/ABHD5/CPT1A/LPIN1/PCK2/C3/PLCE1/SIK1/PNLIPRP2/LPGAT1/PCK1/FABP3/DGKQ/APOH/CAV1/SLC22A4/ACSL4/FAAH/LIPG/SEL1L/MOGAT2/FABP2/LPL/MGLL/CETP/FABP1/APOC1/FBXW7/APOC2/CAT/ACSL1/FABP4/MOGAT3/CPS1 34

BP GO:0006639 acylglycerol metabolic process 34/2416 136/18862 7.94812335837538e-05 0.000861287549380314 0.000600102328206524 LIPC/ABHD5/CPT1A/LPIN1/PCK2/C3/PLCE1/SIK1/PNLIPRP2/LPGAT1/PCK1/FABP3/DGKQ/APOH/CAV1/SLC22A4/ACSL4/FAAH/LIPG/SEL1L/MOGAT2/FABP2/LPL/MGLL/CETP/FABP1/APOC1/FBXW7/APOC2/CAT/ACSL1/FABP4/MOGAT3/CPS1 34

BP GO:0098661 inorganic anion transmembrane transport 31/2416 120/18862 8.37796130323222e-05 0.000906218681801525 0.000631408106624341 ANKH/APOL1/SLC26A2/ANO10/BEST2/PTAFR/CLCN2/SLC20A2/SLC20A1/GABRP/CLIC2/SLC26A3/ANO5/SLC4A11/TTYH3/SLC1A3/SLC1A4/GABRB2/FXYD3/SLC37A2/BEST4/CLIC4/SLC25A10/CLIC6/SLC37A4/ANO9/ANO7/SLC1A1/GABRE/CLCA4/CLCA1 31

BP GO:0071375 cellular response to peptide hormone stimulus 66/2416 325/18862 8.60108160289266e-05 0.00092866750639928 0.00064704933111006 ENPP1/PDK2/EIF4EBP2/LYN/RAB31/LPIN1/PIK3R3/PCK2/SLC25A33/IL1B/IRS1/PPARG/NR1H4/XBP1/SLC30A10/PCK1/FYN/SOCS3/SOCS1/INSR/FBN1/CFLAR/GAB1/OSBPL8/ADCY3/REG1A/EDN1/JAK2/ASS1/APPL2/RARRES2/EEF2K/STAT3/AGTRAP/RAB13/CAV1/UCP2/PDK4/FOXO4/RHOQ/GNAI2/GOT1/NR4A3/CA2/LPL/RAB8B/SLC27A4/PRKACB/GJB2/NR4A2/PRKCQ/SRD5A1/BCAR3/ADCY6/GHR/PRKAR2B/GPT/ADCY4/STAT5A/ATP6V0D2/CAV2/PRKAR1A/GRB14/TCIRG1/ERRFI1/CPS1 66

BP GO:0002833 positive regulation of response to biotic stimulus 55/2416 258/18862 8.62455867505422e-05 0.000929518439481432 0.000647642218960482 IFI16/MMP12/PSMB9/PARP9/LYN/ZBP1/HLA-DRB1/ICAM2/NOD2/FYN/AIM2/CD274/GBP5/MUC1/CADM1/MR1/SLAMF6/MNDA/VAV1/PYHIN1/CLEC4E/SH2D1A/RASGRP1/FCN1/CD180/LY96/FCER1G/MALT1/NMI/PSMB8/CLEC4A/MAVS/CD160/TYROBP/HCK/PLCG2/LILRA2/CRTAM/PRKACB/NLRC5/TLR8/WNT5A/CD1D/IFI35/LAG3/MUC20/F2RL1/IL18RAP/CLEC4D/TLR4/PSMA8/LY86/FPR2/KLK7/MUCL1 55

BP GO:0043030 regulation of macrophage activation 19/2416 59/18862 8.71324416941425e-05 0.000937381502702328 0.000653120810342756 ZC3H12A/CX3CL1/CST7/CTSC/PTPRC/IL33/SYT11/CD74/LRFN5/CEBPA/GPR137B/FCGR2B/LRRK2/MIF/SPHK1/WNT5A/IL6/TLR4/STAP1 19

BP GO:0034308 primary alcohol metabolic process 26/2416 94/18862 9.07825519518147e-05 0.000974890107446514 0.000679254940635199 NAAA/SDR16C5/RDH5/SULT1A2/ADH6/RETSAT/CLCN2/SULT1A1/PECR/ACSS2/DGKQ/CHKA/ADH1C/ALDH1A2/CYP3A4/BMP5/AKR1B10/GDPD3/AKR1B1/NAPEPLD/TTR/SULT1B1/CYP27C1/AKR1C3/ALDH1A3/ALDH1A1 26

BP GO:2000181 negative regulation of blood vessel morphogenesis 36/2416 148/18862 9.15899770716908e-05 0.000981791840552656 0.000684063725005339 ECSCR/TNMD/SULF1/STAT1/PPARG/ADAMTS9/HOXA5/ADAMTS1/MIR21/ANGPT2/SPARC/SEMA4A/PF4/CXCL10/PLK2/TEK/KLK3/THBS2/TIE1/APOH/SERPINF1/SEMA6A/SEMA3E/COL4A2/PTPRM/SPINK5/FOXO4/EPHA2/DCN/CD160/GPR4/HHEX/TNF/SERPINE1/MIR214/KLF4 36

BP GO:0046849 bone remodeling 25/2416 89/18862 9.36344148522566e-05 0.00100190504940655 0.000698077608602764 SNX10/GREM1/GJA1/UBASH3B/RAC2/CD38/CTHRC1/DEF8/GPR137B/PDK4/IHH/S1PR1/EPHA2/RASSF2/CSF1R/CA2/TNFSF11/SPP1/IL6/TNFAIP3/ACP5/TNFRSF11B/TCIRG1/TMEM119/TPH1 25

BP GO:0001649 osteoblast differentiation 49/2416 223/18862 9.38776883275666e-05 0.00100270792550591 0.000698637012737692 BMP3/FGFR2/HOXA2/IFITM1/GREM1/TWSG1/FERMT2/ACVR2A/TPM4/RRAS2/PPARG/GDPD2/VEGFC/MIR21/TWIST1/TNC/IGFBP5/JUNB/TP53INP2/CEBPB/CTHRC1/CEBPA/LEF1/SEMA4D/BMP7/SATB2/DDR2/IHH/COL1A1/WWTR1/HGF/CLEC5A/EPHA2/LTF/RASSF2/VCAN/SPP1/DDX21/TNF/TRPM4/IL6/CAT/BAMBI/TCIRG1/TMEM119/SFRP2/SNAI2/PTHLH/TOB1 49

BP GO:0002931 response to ischemia 17/2416 50/18862 9.49569378046399e-05 0.00101242101845376 0.000705404612822341 FAIM2/MAP3K5/PPARGC1A/CX3CL1/GJA1/MLYCD/HYOU1/EEF2K/PINK1/CAV1/EGR1/CSF1R/PANX1/GJB2/CPEB4/P2RX4/MAP2K6 17

BP GO:0015698 inorganic anion transport 40/2416 171/18862 9.73660973239977e-05 0.00103625346437683 0.000722009875833028 PRKG2/ANKH/ABCB1/ENPP1/APOL1/SLC26A2/ANO10/IP6K2/LRRC8C/BEST2/PTAFR/CLCN2/SLC20A2/SLC20A1/GABRP/CEBPB/CLIC2/SLC26A3/ANO5/SLC4A4/SLC4A11/TTYH3/SLC1A3/SLC1A4/GABRB2/FXYD3/SLC37A2/BEST4/CLIC4/SLC25A10/CLIC6/SLC37A4/CA7/WNK4/ANO9/ANO7/SLC1A1/GABRE/CLCA4/CLCA1 40

BP GO:0061458 reproductive system development 79/2416 408/18862 9.9672230570941e-05 0.00105890640677862 0.000737793319452786 FGFR2/HSPA5/SERPINB5/PLCD3/PRDX4/TEX11/HOXA9/HIF1A/HSD17B2/C3/ANXA1/EOMES/SULF1/ACVR2A/ADM/BSG/PPARG/ICAM1/ADAMTS1/GJA1/SOCS3/TNC/PDGFRB/UTF1/BASP1/HTRA1/VDR/JUNB/CEBPB/FZD5/MME/ZFPM2/RSPO3/OVOL2/MMP19/GJB3/CEBPA/LEF1/SERPINF1/ADA/RAB13/STC1/BMP7/HOXA10/FOSL1/HSD17B3/CDX2/FGF9/SPATA2/TIFAB/GATA6/DCN/ADAM19/BMP5/CYP27B1/SPINT1/TFAP2C/GJB2/MMP14/SPP1/SRD5A1/PTPN6/FLNA/WNT5A/PKD2/LIF/INHBA/NRIP1/AKR1C3/GRHL2/PHLDA2/NDP/ADCYAP1/MGST1/HSP90AB1/SFRP2/HOXB13/WNT2/OSR1 79

BP GO:0030879 mammary gland development 33/2416 132/18862 0.000100485680998026 0.00106564885898263 0.000742491124812163 FGFR2/HOXA9/HIF1A/CCL11/OAS2/HOXA5/XBP1/ROBO1/PAM/IGFBP5/CEBPB/JAK2/LEF1/CAV1/NME1/EPHA2/IRF6/APLN/CSF1R/TNFSF11/ITGA2/WNT5A/NRG1/DDR1/STAT5A/HOXB9/SOSTDC1/ELF3/FOXF1/XDH/MST1/WNT2/TPH1 33

BP GO:0072540 T-helper 17 cell lineage commitment 8/2416 14/18862 0.000104847903353381 0.00110233519546103 0.000768052339472585 SLAMF6/IL12RB1/STAT3/IL23A/IRF4/BATF/LY9/IL6 8

BP GO:0090218 positive regulation of lipid kinase activity 14/2416 37/18862 0.000104947807535054 0.00110233519546103 0.000768052339472585 LYN/FGR/FGFR3/IRS1/NOD2/VAV3/PDGFRB/TEK/CCL21/CCL19/CCR7/CD19/FGF2/FPR2 14

BP GO:1904994 regulation of leukocyte adhesion to vascular endothelial cell 14/2416 37/18862 0.000104947807535054 0.00110233519546103 0.000768052339472585 SELP/ICAM1/ITGB2/MIR21/PTAFR/ETS1/CCL21/ITGA4/TNF/ST3GAL4/SELE/IL6/KLF4/CXCL12 14

BP GO:0031529 ruffle organization 18/2416 55/18862 0.000104967140402297 0.00110233519546103 0.000768052339472585 SNX10/ICAM1/TACSTD2/COBL/DEF8/PLEK/CAV1/CCL21/CCR7/AIF1/CSF1R/RCC2/EVL/SH3BP1/PFN2/STAP1/TCIRG1/EPS8L3 18

BP GO:0045620 negative regulation of lymphocyte differentiation 18/2416 55/18862 0.000104967140402297 0.00110233519546103 0.000768052339472585 ANXA1/ZC3H12A/MIR21/IRF1/SOCS1/CTLA4/CD74/CR1/HMGB3/IHH/RUNX3/LILRB4/BCL6/SMAD7/NRARP/LAG3/INHBA/DTX1 18

BP GO:0043542 endothelial cell migration 58/2416 278/18862 0.000105054763594273 0.00110233519546103 0.000768052339472585 S100P/SEMA5A/HIF1A/GLUL/PIK3R3/GREM1/ANXA1/ZC3H12A/CD40/PPARG/ADAMTS9/ITGB2/ROBO1/VEGFC/EFNA1/MIR21/ANGPT2/SPARC/SEMA4A/FSTL1/RHOJ/PLK2/TEK/CDH5/CXCL13/EDN1/MMRN2/EGR3/APOH/CALR/AGT/FAP/SERPINF1/RAB13/STC1/PLXND1/KDR/S100A2/ETS1/PTPRM/MEOX2/PTP4A3/ANXA3/EPHA2/CLEC14A/DCN/FUT1/PTGS2/PIK3CD/FGF2/P2RX4/TNF/FBXW7/WNT5A/STAT5A/KLF4/SH3BP1/PRSS3 58

BP GO:2001234 negative regulation of apoptotic signaling pathway 49/2416 224/18862 0.000105480553396212 0.00110485781764749 0.000769809977149302 PEA15/VNN1/MMP9/FAIM2/BCL2L10/HIF1A/IL1B/UNC5B/STRADB/CX3CL1/ICAM1/EYA2/CD44/XBP1/FYN/MIR21/ACAA2/MUC1/CFLAR/PLAUR/CD74/PF4/DNAJA1/TNFRSF10B/ITPRIP/HYOU1/GRINA/PINK1/CLU/HERPUD1/SOD2/HGF/GNAI2/LRRK2/MIF/MPV17L/BMP5/IL1A/CTH/NR4A2/ITGAV/TNF/SH3RF1/SERPINE1/TNFAIP3/ZNF385A/SFRP2/CXCL12/SNAI2 49

BP GO:1901343 negative regulation of vasculature development 36/2416 149/18862 0.0001061051254573 0.00110945008372896 0.000773009639758165 ECSCR/TNMD/SULF1/STAT1/PPARG/ADAMTS9/HOXA5/ADAMTS1/MIR21/ANGPT2/SPARC/SEMA4A/PF4/CXCL10/PLK2/TEK/KLK3/THBS2/TIE1/APOH/SERPINF1/SEMA6A/SEMA3E/COL4A2/PTPRM/SPINK5/FOXO4/EPHA2/DCN/CD160/GPR4/HHEX/TNF/SERPINE1/MIR214/KLF4 36

BP GO:2000116 regulation of cysteine-type endopeptidase activity 50/2416 230/18862 0.000106306483914388 0.00110960883385246 0.000773120248948771 S100A8/IFI16/CASP1/PSMB9/MMP9/BCL2L10/MAP3K5/LAMP3/BIRC3/CTSH/SERPINB9/MT3/S100A9/TNFAIP8/CST7/PPARG/CD44/ROBO1/FYN/AIM2/LAPTM5/FAM162A/VIL1/CFLAR/F3/ACVR1C/PLAUR/TNFRSF10B/JAK2/RIPK2/VCP/CD27/MALT1/LCK/HERPUD1/HGF/CYCS/LTF/CARD8/NLRP1/FABP1/PMAIP1/TNF/SH3RF1/SLC1A1/AQP1/KLF4/GRAMD4/XDH/SFRP2 50

BP GO:0007259 receptor signaling pathway via JAK-STAT 39/2416 166/18862 0.000107071092936584 0.00111395000513144 0.000776144961187481 PARP9/LYN/HCLS1/CD40/FGFR3/STAT1/CCL2/FYN/SOCS3/SOCS1/PTPRC/IFNAR2/IL26/IL10RA/HES5/JAK2/AGT/STAT3/CAV1/CLCF1/NMI/STAP2/IL24/PTK6/CSF1R/IL23A/STAT4/AKR1B1/CD300A/PARP14/TNF/GHR/PKD2/LIF/IL6/STAT5A/IFNG/SH2B3/OSM 39

BP GO:0035455 response to interferon-alpha 10/2416 21/18862 0.000107096200157771 0.00111395000513144 0.000776144961187481 IFITM3/IFITM2/LAMP3/IFITM1/IFIT3/IFNAR2/PYHIN1/BST2/MX2/IFIT2 10

BP GO:0007254 JNK cascade 43/2416 189/18862 0.000107506373070302 0.00111626826393554 0.0007777602086234 MAP3K5/IL1B/STRADB/NOD2/SIRPA/MLKL/DNAJA1/SH2D3C/MARVELD3/PDCD4/UNC5CL/ARHGEF6/PINK1/RIPK2/RASGRP1/SLAMF1/CD27/SH3RF3/MAGI3/TNIK/CCL21/MAP4K4/FCGR2B/DUSP10/CCL19/CCR7/MAP4K1/RASSF2/DUSP22/PKN1/TNFSF11/TRAF1/TNF/WNT5A/SH3RF1/PHLPP1/F2RL1/SERPINB3/SH3RF2/TLR4/ADORA2B/SFRP2/CDC42EP5 43

BP GO:0006953 acute-phase response 16/2416 46/18862 0.000111379955334169 0.00115447745007243 0.000804382469186815 SERPINA1/SERPINA3/IL1B/APOL2/CEBPB/REG3A/ASS1/PTGES/SAA4/IL1A/PTGS2/TNFSF11/TNF/IL6/FN1/CD163 16

BP GO:0010922 positive regulation of phosphatase activity 13/2416 33/18862 0.000114059604203359 0.00117824575923118 0.000820943044889972 MAGI2/CHP2/PTPRC/PDGFRB/JAK2/PLEK/FCRL3/CD300A/ITGA2/PPP1R14D/IFNG/CD33/HSP90AB1 13

BP GO:0048704 embryonic skeletal system morphogenesis 25/2416 90/18862 0.000114068423334965 0.00117824575923118 0.000820943044889972 FGFR2/PRRX1/HOXA2/HOXA9/HOXA3/HOXA5/HOXA4/CHST11/TWIST1/HOXA7/FLVCR1/MTHFD1L/BMP7/HOXA6/SATB2/TULP3/HOXB6/MMP14/HOXB5/HOXB7/HOXB9/GRHL2/PAX5/HYAL1/OSR1 25

BP GO:0033632 regulation of cell-cell adhesion mediated by integrin 7/2416 11/18862 0.000115474924382214 0.00118865379847667 0.000828194848991607 CXCL13/PODXL/ADA/SWAP70/CD3E/FERMT3/SKAP1 7

BP GO:0071492 cellular response to UV-A 7/2416 11/18862 0.000115474924382214 0.00118865379847667 0.000828194848991607 TIMP1/MMP3/OPN3/MMP1/MMP9/PPID/MME 7

BP GO:0050829 defense response to Gram-negative bacterium 24/2416 85/18862 0.000117382300383426 0.00119583597645722 0.000833199033402284 DEFB1/SELP/DEFB4A/DMBT1/CXCL6/IGHM/MR1/RARRES2/NOS2/DEFA6/DEFA5/LTF/RNASE6/IL23A/CD160/MPEG1/IL6/SERPINE1/S100A7/F2RL1/AQP1/TLR4/LYZ/CHGA 24

BP GO:0098742 cell-cell adhesion via plasma-membrane adhesion molecules 57/2416 273/18862 0.000117393073039356 0.00119583597645722 0.000833199033402284 CNTN4/CDH3/VCAM1/CLDN2/ITGA5/PECAM1/PCDH17/SELP/BSG/CX3CL1/CLDN15/ESAM/ICAM1/ITGB2/ROBO1/EMB/CADM1/SELL/CDH11/SPARCL1/FXYD5/CLDN1/CDH5/LRFN5/KIFAP3/PTPRF/IL1RN/REG3A/CEACAM6/CLDN8/ITGAL/PCDH20/IGSF9/PTPRM/NEXN/CLDN23/SDK1/ALCAM/PCDH7/ROBO4/CRTAM/CDHR5/MYADM/MPZL2/CDHR1/DCHS1/DSC2/SELE/DSG3/NTNG2/KLF4/CXADR/MYPN/CLDN7/HMCN1/CD177/CDHR2 57

BP GO:0030206 chondroitin sulfate biosynthetic process 11/2416 25/18862 0.000117978448684034 0.00119583597645722 0.000833199033402284 CHST3/BGN/CHST11/CSGALNACT2/UGDH/CHST15/CHSY1/DCN/CSGALNACT1/VCAN/CHSY3 11

BP GO:0033622 integrin activation 11/2416 25/18862 0.000117978448684034 0.00119583597645722 0.000833199033402284 FERMT2/SELP/CX3CL1/CXCL13/PLEK/RASIP1/FBLIM1/FERMT3/SKAP1/FN1/CXCL12 11

BP GO:0034035 purine ribonucleoside bisphosphate metabolic process 11/2416 25/18862 0.000117978448684034 0.00119583597645722 0.000833199033402284 ENPP1/SLC26A2/SULT1A2/BPNT1/SULT1A1/TPST2/TPST1/PAPSS2/PAPSS1/SULT1B1/SULT1C2 11

BP GO:0050427 3'-phosphoadenosine 5'-phosphosulfate metabolic process 11/2416 25/18862 0.000117978448684034 0.00119583597645722 0.000833199033402284 ENPP1/SLC26A2/SULT1A2/BPNT1/SULT1A1/TPST2/TPST1/PAPSS2/PAPSS1/SULT1B1/SULT1C2 11

BP GO:0060330 regulation of response to interferon-gamma 11/2416 25/18862 0.000117978448684034 0.00119583597645722 0.000833199033402284 PARP9/STAT1/PPARG/SOCS3/SOCS1/JAK2/NLRC5/PARP14/IFNGR1/IFNG/HSP90AB1 11

BP GO:0060334 regulation of interferon-gamma-mediated signaling pathway 11/2416 25/18862 0.000117978448684034 0.00119583597645722 0.000833199033402284 PARP9/STAT1/PPARG/SOCS3/SOCS1/JAK2/NLRC5/PARP14/IFNGR1/IFNG/HSP90AB1 11

BP GO:0072012 glomerulus vasculature development 11/2416 25/18862 0.000117978448684034 0.00119583597645722 0.000833199033402284 PECAM1/ANGPT2/CFLAR/PDGFRB/CD34/TEK/BMP7/EGR1/GPR4/SERPINB7/OSR1 11

BP GO:0070302 regulation of stress-activated protein kinase signaling cascade 42/2416 184/18862 0.000118903001589392 0.00120294724768924 0.000838153813517143 LYN/MAP3K5/IL1B/ZC3H12A/RELL1/NOD2/SIRPA/DNAJA1/IL26/MARVELD3/PDCD4/UNC5CL/PINK1/RIPK2/RASGRP1/SLAMF1/CD27/SH3RF3/MAGI3/CCL21/MAP4K4/FCGR2B/HGF/DUSP10/CCL19/CCR7/SPI1/RASSF2/DUSP22/TNFSF11/TRAF1/SPHK1/TNF/WNT5A/SH3RF1/PHLPP1/F2RL1/SERPINB3/SH3RF2/TLR4/XDH/SFRP2 42

BP GO:0072337 modified amino acid transport 12/2416 29/18862 0.000119285540836299 0.00120294724768924 0.000838153813517143 SLC22A5/SLC3A1/SLC25A20/SLC6A20/GJA1/SLC9A3R1/SLC7A11/SLC22A4/ABCC1/SLC1A4/PDZK1/SLC25A32 12

BP GO:1902624 positive regulation of neutrophil migration 12/2416 29/18862 0.000119285540836299 0.00120294724768924 0.000838153813517143 RAC2/CD74/EDN1/DAPK2/CCL21/NCKAP1L/CCL19/CCR7/IL1R1/IL23A/C3AR1/C5AR1 12

BP GO:0007229 integrin-mediated signaling pathway 28/2416 106/18862 0.000119671149815136 0.00120479738665238 0.000839442898329855 TIMP1/ITGA5/THY1/FGR/FERMT2/ITGB2/ITGAX/ADAMTS1/VAV3/VAV1/COL3A1/ZYX/PLEK/ITGAL/MADCAM1/FUT8/HCK/RCC2/ITGAV/ISG15/ITGA4/FLNA/ITGA2/FERMT3/FN1/ADAM9/LAMA5/CD177 28

BP GO:0006636 unsaturated fatty acid biosynthetic process 17/2416 51/18862 0.00012558142964064 0.00126004262737073 0.000877935034436161 EDN2/IL1B/TBXAS1/ANXA1/FADS1/DEGS1/CD74/DECR2/EDN1/SCD/PTGDS/PTGES/MIF/PTGS2/HPGDS/FADS3/AKR1C3 17

BP GO:0032964 collagen biosynthetic process 17/2416 51/18862 0.00012558142964064 0.00126004262737073 0.000877935034436161 PPARG/PDGFRB/TRAM2/VIM/ADAMTS3/CIITA/IHH/COL1A1/GOT1/RCN3/SERPINB7/SERPINH1/COL5A1/ENG/ITGA2/IL6/ERRFI1 17

BP GO:0009612 response to mechanical stimulus 45/2416 202/18862 0.000127050884351011 0.00127076537318874 0.000885406110425567 CHI3L1/CASP1/CNN2/IL1B/CD40/TMEM120A/MMP7/PPARG/FYN/GJA1/IRF1/ANGPT2/BAG3/TNC/CXCL10/BTG2/TNFRSF10B/COL3A1/EDN1/P2RY1/ETS1/FOSL1/CXCR4/IHH/COL1A1/TIFAB/GOT1/SLITRK6/DCN/SHANK3/MMP14/TLR8/ENG/FOS/NFKBIA/ITGA2/KCNJ2/PKD2/BNIP3/AQP1/ENDOG/TLR4/FOSB/CXCL12/CASP5 45

BP GO:0045667 regulation of osteoblast differentiation 32/2416 128/18862 0.000127076537318874 0.00127076537318874 0.000885406110425567 FGFR2/HOXA2/IFITM1/GREM1/TWSG1/FERMT2/ACVR2A/PPARG/GDPD2/VEGFC/MIR21/TWIST1/IGFBP5/CEBPB/CTHRC1/CEBPA/SEMA4D/BMP7/DDR2/WWTR1/HGF/LTF/RASSF2/TNF/TRPM4/IL6/BAMBI/TCIRG1/TMEM119/SFRP2/SNAI2/TOB1 32

BP GO:2001233 regulation of apoptotic signaling pathway 69/2416 348/18862 0.000128792389118795 0.00128448921916798 0.000894968203747385 PEA15/S100A8/VNN1/MMP9/FAIM2/BCL2L10/HIF1A/IL1B/UNC5B/STRADB/S100A9/CX3CL1/CTSC/ICAM1/EYA2/CD44/XBP1/FYN/MIR21/ACAA2/PTPRC/MUC1/SLC9A3R1/CFLAR/PLAUR/CD74/PF4/DNAJA1/TNFRSF10B/G0S2/ITPRIP/HYOU1/TIMP3/GRINA/AGT/PINK1/SGMS1/CAV1/CLU/HYAL2/DAPK2/P4HB/LCK/HERPUD1/SOD2/HGF/GNAI2/RNF183/LRRK2/MIF/MPV17L/BMP5/IL1A/TRAF1/CTH/PMAIP1/NR4A2/TNFRSF12A/ITGAV/TNF/FBXW7/SH3RF1/INHBA/SERPINE1/TNFAIP3/ZNF385A/SFRP2/CXCL12/SNAI2 69

BP GO:1902622 regulation of neutrophil migration 15/2416 42/18862 0.00012893174488114 0.00128448921916798 0.000894968203747385 NOD2/RAC2/CD74/SLAMF8/EDN1/RHOH/DAPK2/CCL21/NCKAP1L/CCL19/CCR7/IL1R1/IL23A/C3AR1/C5AR1 15

BP GO:0030856 regulation of epithelial cell differentiation 37/2416 156/18862 0.00012909547689289 0.00128448921916798 0.000894968203747385 CTSK/GRHL1/MMP9/IL1B/MAFF/STAT1/MIR21/HOXA7/KLF7/VDR/CDH5/HES5/AQP3/CEBPB/REG3A/OVOL2/ZEB1/CAV1/WWTR1/ZBED2/CYP27B1/S1PR3/FGF2/PRKCH/APOLD1/PROM1/TNF/LIF/ZFP36/SERPINE1/IFNG/GRHL2/ESRP1/XDH/FRZB/ERRFI1/OSR1 37

BP GO:0035821 modulation of process of other organism 31/2416 123/18862 0.000137141728235844 0.00136227450047605 0.000949165119105973 ZC3H12A/SERPINB9/S100A9/CXCL6/INSR/PPIB/REG1A/STOM/SMARCB1/REG3A/CCL4/LRRC19/NOS2/LEF1/DEFA6/FBXL2/HYAL2/DEFA5/SLPI/POU2F3/LTF/REG1B/CSF1R/MPEG1/NAPEPLD/PRF1/F2RL1/AQP1/IFNG/CAV2/KRT6A 31

BP GO:0001935 endothelial cell proliferation 43/2416 191/18862 0.000138283422944764 0.00137132978494308 0.000955474390957341 SEMA5A/HIF1A/CCL11/TNMD/SULF1/STAT1/PPARG/CCL2/GJA1/VEGFC/MIR21/SPARC/PROK2/F3/CD34/APLNR/TEK/PPP1R16B/TIE1/EGR3/APOH/CAV1/KDR/PTPRM/ALDH1A2/EPHA2/APLN/FUT1/PIK3CD/FGF2/MMP14/LRG1/NRARP/ITGA4/TNF/ECM1/WNT5A/STAT5A/CAV2/XDH/CCR3/WNT2/CXCL12 43

BP GO:0009259 ribonucleotide metabolic process 81/2416 425/18862 0.00014136638270047 0.0013995741543103 0.000975153662796562 ACSF2/SEC13/ENPP1/PDK2/HMGCS2/ACOT8/HIF1A/KYNU/PDE8A/PFKFB3/SLC26A2/ENTPD5/SPHK2/PPARGC1A/CROT/ACAT1/PGM2L1/SULT1A2/PGM1/GIMAP7/ACOT11/TDO2/PDHA1/PDE4C/ACOT4/INSR/BPNT1/MLYCD/HMGCL/AK3/SULT1A1/PPT1/DDIT4/PDE4B/ADCY3/AMPD1/ACSS2/PANK3/ACOT9/TPST2/SCD/SUCLG2/PINK1/PANK1/PFKFB2/VCP/SLC4A4/MAGI3/PDK4/ACSL4/TPST1/SLC2A6/RHOQ/NME1/PAPSS2/OGDHL/EPHA2/LRRK2/PDP1/PAPSS1/FAR2/HSD17B8/ACOT13/RFK/ADCY6/SULT1B1/GUCY2C/HMGCR/ADCY4/PDK1/NUP210/ENO2/IFNG/ACSL1/ALDOB/ACSM3/PDE9A/SULT1C2/H19/XDH/PTHLH 81

BP GO:1905330 regulation of morphogenesis of an epithelium 19/2416 61/18862 0.000143770291177101 0.00142101315989307 0.000990091295616069 GREM1/SULF1/ITGAX/GJA1/MIR21/TACSTD2/CXCL10/AGT/BMP7/HGF/PIK3CD/FGF2/TNF/HOXB7/WNT5A/ADAMTS12/LIF/NTN4/WNT2 19

BP GO:0061008 hepaticobiliary system development 34/2416 140/18862 0.000146262710299903 0.00143573944559861 0.00100035183908275 CPT1A/PCK2/ANXA1/XBP1/PCK1/OTC/CFLAR/HMGCL/CLDN1/REG1A/MPST/CEBPB/COBL/HNF4A/ASS1/CEBPA/ADA/UCP2/SULF2/IHH/HGF/ALDH1A2/GATA6/HNF1B/SOX17/SRD5A1/FBXW7/ITGA2/PTPN3/PKD2/IL6/TNFAIP3/FRZB/CPS1 34

BP GO:0001914 regulation of T cell mediated cytotoxicity 14/2416 38/18862 0.000146705591001603 0.00143573944559861 0.00100035183908275 HLA-DRB1/LILRB1/PTPRC/MR1/IL7R/HLA-DRA/IL12RB1/FCGR2B/CD1C/IL23A/CD1D/CD1A/AZGP1/CD1B 14

BP GO:0030204 chondroitin sulfate metabolic process 14/2416 38/18862 0.000146705591001603 0.00143573944559861 0.00100035183908275 CHST3/BGN/CHST11/CSGALNACT2/UGDH/CHST15/CHSY1/SPOCK2/EGFLAM/DCN/CSGALNACT1/VCAN/CHSY3/HYAL1 14

BP GO:0045923 positive regulation of fatty acid metabolic process 14/2416 38/18862 0.000146705591001603 0.00143573944559861 0.00100035183908275 CPT1A/IL1B/ANXA1/PPARGC1A/IRS1/PPARG/LPGAT1/TWIST1/MLYCD/CD74/NR4A3/PTGS2/FABP1/APOC2 14

BP GO:0048286 lung alveolus development 14/2416 38/18862 0.000146705591001603 0.00143573944559861 0.00100035183908275 FGFR2/MMP12/EDN2/ABCA12/TMEM38B/HOXA5/SLC7A11/IGFBP5/ADA/GATA6/PKDCC/LIF/FOXF1/ERRFI1 14

BP GO:0071398 cellular response to fatty acid 14/2416 38/18862 0.000146705591001603 0.00143573944559861 0.00100035183908275 CPT1A/ZC3H12A/PPARGC1A/IRS1/NR1H4/PTAFR/CLDN1/EDN1/ASS1/PDK4/NME1/LPL/AKR1C3/CPS1 14

BP GO:0070304 positive regulation of stress-activated protein kinase signaling cascade 30/2416 118/18862 0.000147589394578601 0.00144202096998108 0.00100472849286036 LYN/MAP3K5/IL1B/ZC3H12A/RELL1/NOD2/IL26/UNC5CL/RIPK2/RASGRP1/SLAMF1/CD27/SH3RF3/CCL21/FCGR2B/CCL19/CCR7/SPI1/RASSF2/DUSP22/TNFSF11/TRAF1/SPHK1/TNF/WNT5A/SH3RF1/F2RL1/SH3RF2/TLR4/XDH 30

BP GO:0042130 negative regulation of T cell proliferation 20/2416 66/18862 0.000148164744508044 0.00144527312155147 0.0010069944303286 IDO1/HLA-DRB1/TWSG1/LILRB2/LILRB1/CD274/CTLA4/CD86/IL2RA/CEBPB/BTN2A2/CR1/CD80/PLA2G2D/IHH/LRRC32/LILRB4/CRTAM/PTPN6/PRKAR1A 20

BP GO:0030574 collagen catabolic process 16/2416 47/18862 0.000148950750761058 0.00144819979532774 0.00100903359105756 MMP3/MMP12/CTSK/MMP10/MMP1/MMP9/MMP7/COL15A1/MMP19/FAP/ADAMTS3/CTSB/MMP28/MMP14/KLK6/MMP13 16

BP GO:1904707 positive regulation of vascular associated smooth muscle cell proliferation 16/2416 47/18862 0.000148950750761058 0.00144819979532774 0.00100903359105756 MMP9/MAP3K5/ADAMTS1/GJA1/MIR21/NQO2/IGFBP5/EDN1/JAK2/GNAI2/FGF9/NR4A3/HPGD/FGF2/TNF/MIR214 16

BP GO:0032740 positive regulation of interleukin-17 production 9/2416 18/18862 0.000149397917002423 0.00145018173507238 0.0010104145080997 SLC7A5/NOD2/SLAMF6/IL23A/PRKCQ/SPHK1/LY9/IL6/OSM 9

BP GO:0043271 negative regulation of ion transport 64/2416 319/18862 0.00015691600960715 0.0015206819792823 0.00105953557193018 PRKG2/PEA15/ENPP1/PIM3/MMP9/SRI/CYP4F2/IL1B/ANXA1/ANK3/RGS2/LILRB2/SESTD1/IRS1/ERLEC1/ICAM1/LILRB1/TWIST1/BAG3/SLC9A3R1/KCNE2/OAZ2/SYT11/ACVR1C/CD74/GEM/KLF7/P2RY1/PKIA/UBE2J1/APPL2/HECW2/DERL3/CLIC2/ADA/STC1/CAV1/UCP2/RHBDF2/RGS4/NEDD4L/LRRK2/CD36/PKDCC/ITGAV/APOC1/TNF/PKD2/SEMG1/NDFIP2/WNK4/ANO9/HMGCR/APOC2/SLC30A1/GABRE/ADCYAP1/VSNL1/APOD/CD33/GPR35/ABCG5/OSR1/CHGA 64

BP GO:0002820 negative regulation of adaptive immune response 17/2416 52/18862 0.000164514678667629 0.00159010053943607 0.00110790297210797 C4BPB/ZC3H12A/NOD2/LILRB1/PTPRC/IL33/IL7R/CR1/C4BPA/SAMSN1/FCGR2B/IL27RA/LILRB4/CD160/BCL6/SMAD7/PTPN6 17

BP GO:0071241 cellular response to inorganic substance 47/2416 216/18862 0.000164612757186587 0.00159010053943607 0.00110790297210797 MMP3/HSPA5/MMP9/ANK3/PPARGC1A/MT3/SLC41A1/SLC30A10/CHP2/SLC25A23/MT1G/CFLAR/SYT11/ALAD/HPCA/CLDN1/MT1F/JUNB/EDN1/MT1M/SYT17/CALR/EEF2K/CEBPA/SERPINF1/MT1E/LRRK2/MT1X/CLIC4/CPNE2/MT2A/P2RX4/FOS/BLM/WNT5A/HVCN1/PKD2/CPNE5/RASGRP2/BNIP3/AQP1/ENDOG/AKR1C3/FABP4/SYT13/FOSB/ALOX5AP 47

BP GO:0097696 receptor signaling pathway via STAT 40/2416 175/18862 0.000165326028098251 0.00159440635512229 0.00111090305032805 PARP9/LYN/HCLS1/CD40/FGFR3/STAT1/CCL2/FYN/SOCS3/SOCS1/PTPRC/IL7R/IFNAR2/IL26/IL10RA/HES5/JAK2/AGT/STAT3/CAV1/CLCF1/NMI/STAP2/IL24/PTK6/CSF1R/IL23A/STAT4/AKR1B1/CD300A/PARP14/TNF/GHR/PKD2/LIF/IL6/STAT5A/IFNG/SH2B3/OSM 40

BP GO:0032872 regulation of stress-activated MAPK cascade 41/2416 181/18862 0.000169745472009658 0.00163438289689429 0.00113875671639844 MAP3K5/IL1B/ZC3H12A/RELL1/NOD2/SIRPA/DNAJA1/IL26/MARVELD3/PDCD4/UNC5CL/PINK1/RIPK2/RASGRP1/SLAMF1/CD27/SH3RF3/MAGI3/CCL21/MAP4K4/FCGR2B/HGF/DUSP10/CCL19/CCR7/SPI1/RASSF2/DUSP22/TNFSF11/TRAF1/SPHK1/TNF/WNT5A/SH3RF1/PHLPP1/F2RL1/SERPINB3/SH3RF2/TLR4/XDH/SFRP2 41

BP GO:0002922 positive regulation of humoral immune response 10/2416 22/18862 0.000173851247384504 0.00166852404897205 0.00116254457315343 IL1B/C3/NOD2/PTPRC/CR1/FCGR2B/CCR7/LTA/TNF/KLK7 10

BP GO:0045624 positive regulation of T-helper cell differentiation 10/2416 22/18862 0.000173851247384504 0.00166852404897205 0.00116254457315343 ANXA1/NFKBIZ/MIR21/CD86/IL12RB1/CD80/RIPK2/MALT1/CCL19/IL23A 10

BP GO:0032620 interleukin-17 production 15/2416 43/18862 0.00017473594047464 0.00167163114803989 0.0011647094452521 SLC7A5/NOD2/NR1H4/SLAMF6/RFTN1/NCKAP1L/IL27RA/IL23A/PRKCQ/SPHK1/LY9/IL6/IFNG/TLR4/OSM 15

BP GO:2000404 regulation of T cell migration 15/2416 43/18862 0.00017473594047464 0.00167163114803989 0.0011647094452521 CXCL10/CXCL13/CCL20/CCR6/DOCK8/CCL21/AIF1/IL27RA/ITGA4/ECM1/WNT5A/S100A7/APOD/C10orf99/CXCL12 15

BP GO:0070633 transepithelial transport 12/2416 30/18862 0.000175747322408737 0.00167592646648972 0.00116770220951995 SLC23A1/ABCB1/ABCG2/EDN1/ITPR1/ABCC1/SLC1A3/SLC5A1/SLC1A1/AQP1/CXADR/SCNN1B 12

BP GO:0071711 basement membrane organization 12/2416 30/18862 0.000175747322408737 0.00167592646648972 0.00116770220951995 COL4A1/RAMP2/CAV1/FLRT2/PXDN/NID1/LAMB1/LAMB2/NTNG2/CAV2/NTN4/NID2 12

BP GO:0019883 antigen processing and presentation of endogenous antigen 11/2416 26/18862 0.000180912275385631 0.00172242358034882 0.00120009908591948 TAP2/HLA-DRB1/TAP1/CD74/HLA-DRA/CD1C/CD1D/CD1A/AZGP1/CD1B/ERAP2 11

BP GO:0045453 bone resorption 19/2416 62/18862 0.000182667168058168 0.00173635776973952 0.00120980773606895 SNX10/UBASH3B/RAC2/CD38/DEF8/GPR137B/PDK4/IHH/S1PR1/CSF1R/CA2/TNFSF11/SPP1/IL6/TNFAIP3/ACP5/TNFRSF11B/TCIRG1/TMEM119 19

BP GO:0043407 negative regulation of MAP kinase activity 22/2416 77/18862 0.000184174960695346 0.00174790249322335 0.00121785152521479 IRAK3/DUSP4/LYN/IL1B/RGS2/LAX1/DNAJA1/PDCD4/AGT/DUSP14/DUSP21/CAV1/HYAL2/BMP7/CBLC/DUSP10/RGS4/CD300A/PTPN6/SERPINB3/SH2B3/SFRP2 22

BP GO:0031640 killing of cells of other organism 20/2416 67/18862 0.000186066021217973 0.00176304210883802 0.00122840005640516 APOL1/DEFB4A/SERPINB9/CXCL6/PF4/CFHR2/NOS2/DEFA6/S100A12/DEFA5/LTF/CCL13/GNLY/PRF1/SEMG1/F2RL1/IFNG/KRT6A/LYZ/CHGA 20

BP GO:0035924 cellular response to vascular endothelial growth factor stimulus 21/2416 72/18862 0.000186386589000851 0.00176327630229377 0.00122856323075749 VCAM1/ANXA1/RAMP2/ROBO1/VEGFC/MIR21/MT1G/GAB1/PDGFRB/MAPKAPK2/EGR3/ADAMTS3/SEMA6A/KDR/DCN/PIK3CD/SPHK1/ADAMTS12/GAS1/XDH/TSPAN12 21

BP GO:0019693 ribose phosphate metabolic process 82/2416 435/18862 0.000187495672126309 0.00177095753704089 0.00123391513310249 ACSF2/SEC13/ENPP1/PDK2/HMGCS2/ACOT8/HIF1A/KYNU/PDE8A/PFKFB3/SLC26A2/ENTPD5/SPHK2/PPARGC1A/CROT/ACAT1/PGM2L1/SULT1A2/PGM1/GIMAP7/ACOT11/TDO2/PDHA1/PDE4C/ACOT4/INSR/BPNT1/MLYCD/HMGCL/AK3/SULT1A1/PPT1/DDIT4/PDE4B/ADCY3/AMPD1/ACSS2/PANK3/ACOT9/TPST2/SCD/SUCLG2/PINK1/PANK1/PFKFB2/VCP/SLC4A4/MAGI3/PDK4/ACSL4/TPST1/SLC2A6/RHOQ/NME1/PAPSS2/OGDHL/EPHA2/LRRK2/PDP1/PAPSS1/FAR2/HSD17B8/ACOT13/RFK/ADCY6/RPIA/SULT1B1/GUCY2C/HMGCR/ADCY4/PDK1/NUP210/ENO2/IFNG/ACSL1/ALDOB/ACSM3/PDE9A/SULT1C2/H19/XDH/PTHLH 82

BP GO:0052372 modulation by symbiont of entry into host 16/2416 48/18862 0.000197093948551751 0.00185867078064626 0.00129502935882188 IFITM3/IFITM2/IFITM1/HLA-DRB1/TRIM22/CD74/CIITA/CAV1/FCN1/P4HB/LGALS1/FCN3/LY6E/ITGAV/KRT6A/TMPRSS4 16

BP GO:0051091 positive regulation of DNA-binding transcription factor activity 55/2416 266/18862 0.000199128761153843 0.00187170270175694 0.00130410935330821 IRAK3/S100A8/LRP8/IL1B/GREM1/TRIM22/HCLS1/PPARGC1A/CD40/S100A9/CX3CL1/PPARG/ICAM1/ITGB2/NOD2/AIM2/CFLAR/IL18R1/SMARCB1/EDN1/JAK2/CRTC3/AGT/PINK1/RIPK2/STAT3/BTK/CAV1/CLU/S100A12/FOSL1/MALT1/DDR2/ANXA3/TLR2/LTF/CD36/MAVS/TNFSF11/TRAF1/PRKCH/CTH/PRKCQ/SPHK1/TNF/WNT5A/IL6/CAT/IL18RAP/NDP/TLR4/WNT2/FANK1/CSF3/RELN 55

BP GO:0038065 collagen-activated signaling pathway 8/2416 15/18862 0.000199417989197257 0.00187170270175694 0.00130410935330821 COL4A1/UBASH3B/COL4A2/DDR2/COL1A1/OSCAR/ITGA2/DDR1 8

BP GO:0046321 positive regulation of fatty acid oxidation 8/2416 15/18862 0.000199417989197257 0.00187170270175694 0.00130410935330821 CPT1A/PPARGC1A/IRS1/PPARG/TWIST1/MLYCD/NR4A3/FABP1 8

BP GO:0006821 chloride transport 28/2416 109/18862 0.000200316172288867 0.00187717670887051 0.0013079233692148 PRKG2/ABCB1/APOL1/SLC26A2/ANO10/BEST2/PTAFR/CLCN2/GABRP/CLIC2/SLC26A3/ANO5/TTYH3/SLC1A3/SLC1A4/GABRB2/FXYD3/BEST4/CLIC4/CLIC6/CA7/WNK4/ANO9/ANO7/SLC1A1/GABRE/CLCA4/CLCA1 28

BP GO:0061041 regulation of wound healing 32/2416 131/18862 0.000201491001434599 0.00188201098917382 0.00131129165529684 DUOX2/SERPING1/ANXA1/FERMT2/XBP1/GJA1/UBASH3B/VIL1/PLAU/F3/PLAUR/CD34/THBD/CLDN1/TFPI/EDN1/REG3A/APOH/FAP/CAV1/CXCR4/CD36/OCLN/FGF2/TNFRSF12A/TNF/KLKB1/ST3GAL4/SERPINE1/F2RL1/TNFAIP3/SH2B3 32

BP GO:0006898 receptor-mediated endocytosis 65/2416 328/18862 0.000201925565446937 0.00188201098917382 0.00131129165529684 VLDLR/APOL1/IGKC/RAB31/MAGI2/GREM1/C3/RAMP2/ADM/IGLV2-23/IGLV3-19/HSP90B1/ITGB2/LILRB1/SAG/SPARC/INSR/IGLV1-44/SYT11/PPT1/HPCA/RAMP3/HYOU1/FCGR1B/CALR/CAV1/IGLV6-57/CXCR2/CLU/FCER1G/CXCL16/CCL21/FCGR2B/IGKV3-20/IGKV4-1/CCL19/WASL/LILRB4/IGHV1-69/APLN/CD36/PLCG2/WDR54/WASF1/LDLRAD3/FCGR1A/SH3GL2/SGIP1/ITGAV/MX2/ITGA4/CXCR1/APOC1/CD14/CALCRL/SELE/CD207/SERPINE1/APOC2/CD163/IGKV1-5/CAV2/DNM1/FPR2/DKK1 65

BP GO:0002701 negative regulation of production of molecular mediator of immune response 14/2416 39/18862 0.000202078222032907 0.00188201098917382 0.00131129165529684 IRAK3/LILRB1/IL33/IL13RA2/CR1/SPINK5/FCGR2B/FCRL3/LILRB4/BCL6/BST2/SMAD7/TNF/CD22 14

BP GO:0010952 positive regulation of peptidase activity 44/2416 200/18862 0.000202095139777055 0.00188201098917382 0.00131129165529684 S100A8/IFI16/CASP1/LYN/BCL2L10/MAP3K5/CTSH/S100A9/PPARG/ROBO1/FYN/EFNA1/MIR21/AIM2/LAPTM5/FAM162A/PCOLCE/CFLAR/F3/ACVR1C/TNFRSF10B/JAK2/CR1/APH1B/PINK1/RIPK2/STAT3/VCP/CAV1/MALT1/LCK/CYCS/RCN3/CARD8/NLRP1/PMAIP1/TNF/SEMG1/FN1/SLC1A1/SERPINB3/GRAMD4/XDH/SFRP2 44

BP GO:0030100 regulation of endocytosis 45/2416 206/18862 0.000204105263974604 0.0018977650129308 0.00132226827552314 RAB31/MAGI2/GREM1/C3/PPARG/LILRB1/INSR/SYT11/PPT1/HPCA/DGKQ/APPL2/EEF2K/CAV1/CLU/RAB17/CCL21/NCKAP1L/CCL19/WASL/NEDD4L/LRRK2/PPP3CC/APLN/CD36/PLCG2/WDR54/CD300A/SH3GL2/SGIP1/ITGAV/SPHK1/APOC1/CD14/ITGA2/WNT5A/CD22/SELE/SERPINE1/APOC2/F2RL1/MCTP1/STAP1/DKK1/CD177 45

BP GO:0016485 protein processing 48/2416 224/18862 0.000206949497094263 0.0019212133998159 0.00133860594529737 IFI16/BACE2/CASP1/CASP4/CTSH/CPXM1/C1R/CST7/CTSE/PLAU/F3/SPCS3/KLK3/MME/APOH/AFG3L2/APH1B/ADAMTS3/RIPK2/CHAC1/SEC11C/IHH/CPZ/BAG2/PCSK1/MMEL1/LRRK2/ADAM19/SRGN/NLRP7/CARD8/PRKACB/LDLRAD3/MMP14/KLK1/TMEM98/GLG1/KLKB1/KLK6/CPM/SERPINE1/CPA3/GAS1/PRSS3/IMMP1L/PCSK1N/IL1R2/TMPRSS4 48

BP GO:0001659 temperature homeostasis 39/2416 171/18862 0.00020795864309944 0.00192757933572731 0.00134304141283014 LCN2/EDN2/LPIN1/CPT2/IL1B/PPARGC1A/GJA1/ACOT11/IL18R1/HADH/G0S2/CEBPB/YBX2/SCD/JAK2/APPL2/PTGES/STAT3/CAV1/UCP2/EGR1/CXCR4/APLN/CD36/IL1A/PTGS2/IRF4/ADAMTS5/TNFSF11/NAPEPLD/ACOT13/TNF/ACSL1/FABP4/ADCYAP1/TLR4/MAP2K6/ALDH1A1/NMU 39

BP GO:0002704 negative regulation of leukocyte mediated immunity 17/2416 53/18862 0.000213579219675161 0.00197353821591311 0.00137506327477521 C4BPB/SERPINB9/NOD2/LILRB1/PTPRC/IL7R/IL13RA2/CR1/C4BPA/FCGR2B/LILRB4/BCL6/BST2/CD300A/SMAD7/PTPN6/FOXF1 17

BP GO:1905517 macrophage migration 17/2416 53/18862 0.000213579219675161 0.00197353821591311 0.00137506327477521 EDN2/CX3CL1/CCL2/SLAMF8/RARRES2/MMP28/CXCL17/MIF/CSF1R/MMP14/C3AR1/MCOLN2/P2RX4/C5AR1/CKLF/STAP1/MST1 17

BP GO:0046434 organophosphate catabolic process 36/2416 154/18862 0.000214700738022086 0.0019808303384081 0.00138014406305545 LIPC/ENPP1/INPP5J/PDE8A/ENTPD5/IMPA2/PNLIPRP2/ACAT1/ENTPD1/PRDX6/GPCPD1/PDE4C/BPNT1/MLYCD/PDE4B/VCP/ADA/GPD1L/OCRL/PLA2G7/FHIT/LIPG/ENPP2/GDPD3/PLCG2/NAPEPLD/DERA/PNP/GDA/ENPP3/APOC1/NUDT12/APOC2/TYMP/PDE9A/XDH 36

BP GO:0062012 regulation of small molecule metabolic process 82/2416 437/18862 0.000218657140849115 0.00201421415681719 0.00140340424737616 NLN/SEC13/ENPP1/PDK2/CLYBL/CPT1A/PSMB9/HIF1A/PFKFB3/ABCB11/IL1B/ANXA1/ENTPD5/SPHK2/PDZD3/SIK1/PPARGC1A/ADM/IRS1/PPARG/NR1H4/LPGAT1/LCMT1/MIR21/PTAFR/PPP1R3B/TWIST1/FABP3/INSR/MLYCD/CLCN2/OAZ2/SLC7A11/GUCA2B/CD74/DDIT4/HPCA/SLC7A7/P2RY1/DGKQ/SCD/APPL2/NOS2/PINK1/PFKFB2/VCP/GUCA2A/PLEK/COQ3/CAV1/FMO5/SLC4A4/EPHX2/EGR1/PDK4/DYRK2/PSMB8/SLC2A6/SCAP/NR4A3/PDP1/BMP5/PTGS2/CYP27B1/SLC27A4/FABP1/PMAIP1/APOC1/TNF/GPT/HMGCR/APOC2/PDK1/NUP210/IFNG/AKR1C3/PHLDA2/STARD4/PSMA8/H19/MST1/SNAI2 82

BP GO:0030449 regulation of complement activation 29/2416 115/18862 0.000219599351316629 0.00201665968235302 0.00140510816794113 CD55/C2/C4BPB/CFB/IGKC/SERPING1/CFP/IL1B/C3/C1R/IGLV2-23/IGLV3-19/IGLV1-44/CFHR2/CFI/C1S/CR1/IGLV6-57/CLU/C4BPA/IGHG1/IGKV3-20/IGKV4-1/IGHV1-69/CD19/C3AR1/C5AR1/IGKV1-5/CR2 29

BP GO:0051282 regulation of sequestering of calcium ion 29/2416 115/18862 0.000219599351316629 0.00201665968235302 0.00140510816794113 CXCL9/THY1/LYN/SRI/CX3CL1/TMEM38B/SLC25A23/UBASH3B/PTPRC/APLNR/CXCL10/CXCL11/CORO1A/TRPV1/CLIC2/ITPR1/LCK/CCL21/CCL19/CCR7/TMEM38A/PLCG2/CD19/FGF2/MCOLN2/PTPN6/PKD2/CCR5/DHRS7C 29

BP GO:0031214 biomineral tissue development 37/2416 160/18862 0.000222802716841751 0.0020429295267336 0.00142341168897281 ANKH/ENPP1/FGFR2/HIF1A/FGR/SNX10/GREM1/COL1A2/FGFR3/ACVR2A/TMEM38B/TWIST1/SLC20A1/CNNM4/CEBPB/MGP/SLC24A3/BMP7/FAM20A/DDR2/COL1A1/S1PR1/LTF/SRGN/CYP27B1/PKDCC/CCR1/TUFT1/SPP1/ISG15/TRPM4/ECM1/MINPP1/TCIRG1/TMEM119/PTHLH/OSR1 37

BP GO:0030865 cortical cytoskeleton organization 18/2416 58/18862 0.0002245113964086 0.00205543459692052 0.00143212459993844 EPB41L1/RAC2/VIL1/EPB41L3/EPB41L2/CALR/LCP1/PLEK/RAB13/RHOH/FMNL1/FMNL3/NCKAP1L/RHOQ/EHD2/LLGL2/TNF/RND1 18

BP GO:0006469 negative regulation of protein kinase activity 51/2416 243/18862 0.000228534550832156 0.00208905816404854 0.00145555182924258 IRAK3/DUSP4/THY1/LYN/IL1B/RGS2/TRIB2/PKIB/SH3BP5/CDKN2B/LAX1/SOCS3/SOCS1/UBASH3B/PTPRC/CAMK2N1/DNAJA1/HEG1/PDCD4/PKIA/ITPRIP/GMFG/AGT/CEBPA/DUSP14/DUSP21/CAV1/HYAL2/BMP7/CBLC/RASIP1/WWTR1/DUSP10/PTK6/RGS4/LILRB4/DUSP22/HHEX/PKN1/CD300A/PTPN6/PPP1R1B/PRKAR2B/TNFAIP3/IFNG/SERPINB3/FABP4/SH2B3/PRKAR1A/SFRP2/ERRFI1 51

BP GO:0002755 MyD88-dependent toll-like receptor signaling pathway 13/2416 35/18862 0.000229302987692941 0.0020896724872323 0.00145597985908362 IRAK3/IRF1/BTK/LY96/TLR2/TLR1/CD36/CD300LF/CD300A/TLR8/CD14/TLR10/TLR4 13

BP GO:0018149 peptide cross-linking 13/2416 35/18862 0.000229302987692941 0.0020896724872323 0.00145597985908362 PI3/TGM2/ANXA1/BGN/COL3A1/CSTA/SPOCK2/EGFLAM/DCN/FN1/DSP/SPRR1B/F13A1 13

BP GO:0048705 skeletal system morphogenesis 46/2416 213/18862 0.000230217866121985 0.00209480684288096 0.00145955722274203 FGFR2/PRRX1/HOXA2/HOXA9/FGR/GREM1/CHAD/HOXA3/FGFR3/HOXA5/HOXA4/CHST11/TWIST1/HOXA7/FLVCR1/TEK/MGP/MTHFD1L/STC1/HYAL2/BMP7/HOXA6/SATB2/TULP3/HOXB6/IHH/COL1A1/TIFAB/CHSY1/LTF/CSGALNACT1/MMP14/SERPINH1/GLG1/HOXB5/HOXB7/HOXD8/HOXB9/GRHL2/PAX5/HYAL1/CDX1/TMEM119/SFRP2/OSR1/MMP13 46

BP GO:0051701 biological process involved in interaction with host 47/2416 219/18862 0.000230856577999363 0.00209741647084787 0.00146137548171933 CD55/IFITM3/IFITM2/ITGA5/IFITM1/HLA-DRB1/TRIM22/SERPINB9/ANPEP/HAVCR1/BSG/ICAM1/INSR/CD74/SLC20A2/CD86/CLDN1/PPID/CR1/CD80/CIITA/VPS37B/SLC10A1/CAV1/FCN1/SLAMF1/HYAL2/CHMP4B/CXCR4/P4HB/SELPLG/CLEC5A/LGALS1/EPHA2/FCN3/LY6E/ITGAV/ITGA2/CCR5/CAV2/CR2/SERPINB3/CXADR/KRT6A/TMPRSS4/HYAL1/CHMP4C 47

BP GO:0034329 cell junction assembly 80/2416 425/18862 0.000233898348942984 0.00211618392808271 0.00147445171251965 CLDN2/ITGA5/THY1/PECAM1/PCDH17/IL1B/GREM1/RAMP2/LAMC1/FERMT2/EPB41L5/MPP7/TLN2/CLDN15/ESAM/EFNA5/NR1H4/GJA1/SEMA4A/FSCN1/CDH11/HEG1/CLDN1/MARVELD3/TEK/CDH5/GJA4/EPB41L3/LRFN5/FZD5/AGT/EEF2K/GJB1/CLDN8/RAB13/CAV1/PLXND1/SEMA4D/FLRT2/KDR/RAB17/MAP4K4/TLR2/GJC1/GABRB2/EPHA2/LRRN3/SPOCK2/CLDN23/SDK1/SLITRK6/SHANK3/PCLO/DUSP22/TESK2/OCLN/FBLIM1/GJB2/MMP14/PRKCH/RCC2/SMAD7/TNF/FLNA/LAMC2/ITGA2/WNT5A/DCHS1/UGT8/FN1/NTNG2/CBLN2/SH3BP1/GRHL2/APOD/LRP4/NRCAM/CLDN7/MARVELD2/SNAI2 80

BP GO:0015804 neutral amino acid transport 15/2416 44/18862 0.000233987451108474 0.00211618392808271 0.00147445171251965 SLC6A14/SFXN1/SLC36A1/SLC3A1/RGS2/SLC7A5/SFXN3/SLC6A20/SLC6A19/SLC6A6/RGS4/SLC1A4/NFKBIE/LLGL2/SLC1A1 15

BP GO:0060711 labyrinthine layer development 15/2416 44/18862 0.000233987451108474 0.00211618392808271 0.00147445171251965 FGFR2/PLCD3/ADM/SOCS3/JUNB/FZD5/RSPO3/OVOL2/LEF1/BMP7/CDX2/BMP5/SPINT1/GRHL2/WNT2 15

BP GO:0010811 positive regulation of cell-substrate adhesion 30/2416 121/18862 0.000237841395296931 0.00214777987268138 0.00149646619528931 ITGA5/THY1/OLFM4/FERMT2/EPB41L5/CX3CL1/TEK/JAK2/CEACAM6/CALR/EGFL6/CCDC80/EFEMP2/KDR/P4HB/CCL21/MAP4K4/NID1/CCR7/PREX1/SPOCK2/EGFLAM/CD36/FUT1/MYADM/FLNA/CD3E/SKAP1/FN1/FOXF1 30

BP GO:0061097 regulation of protein tyrosine kinase activity 25/2416 94/18862 0.00024124168168335 0.0021751897470995 0.00151556403255166 LRP8/THY1/GREM1/SH3BP5/TGFA/FYN/EFNA1/PTPRC/AFAP1L2/ERBB3/AGT/CAV1/HYAL2/AREG/CBLC/PTK6/LILRB4/CSF1R/DUSP22/FCGR1A/FBXW7/NRG1/STAP1/ERRFI1/RELN 25

BP GO:0015791 polyol transport 7/2416 12/18862 0.000246407158741664 0.00221506284479686 0.00154334562393564 AQP7/AQP11/AQP9/SLC5A11/AQP3/SLC5A1/AQP1 7

BP GO:0060670 branching involved in labyrinthine layer morphogenesis 7/2416 12/18862 0.000246407158741664 0.00221506284479686 0.00154334562393564 FGFR2/ADM/SOCS3/FZD5/RSPO3/SPINT1/GRHL2 7

BP GO:0001889 liver development 33/2416 138/18862 0.000247338625318919 0.00222008766099512 0.00154684666595298 CPT1A/PCK2/ANXA1/XBP1/PCK1/OTC/CFLAR/HMGCL/CLDN1/REG1A/MPST/CEBPB/COBL/HNF4A/ASS1/CEBPA/ADA/UCP2/SULF2/IHH/HGF/ALDH1A2/GATA6/HNF1B/SRD5A1/FBXW7/ITGA2/PTPN3/PKD2/IL6/TNFAIP3/FRZB/CPS1 33

BP GO:0046629 gamma-delta T cell activation 9/2416 19/18862 0.000251641655913907 0.00225192833220253 0.0015690316620521 NOD2/LILRB1/PTPRC/MICB/EGR3/LEF1/ITK/NCKAP1L/CXADR 9

BP GO:2001185 regulation of CD8-positive, alpha-beta T cell activation 9/2416 19/18862 0.000251641655913907 0.00225192833220253 0.0015690316620521 LILRB1/IRF1/SOCS1/CD274/NCKAP1L/RUNX3/LILRB4/CRTAM/SH3RF1 9

BP GO:0001516 prostaglandin biosynthetic process 12/2416 31/18862 0.000253517032505105 0.00225522413958322 0.00157132801671773 EDN2/IL1B/TBXAS1/ANXA1/CD74/EDN1/PTGDS/PTGES/MIF/PTGS2/HPGDS/AKR1C3 12

BP GO:0035456 response to interferon-beta 12/2416 31/18862 0.000253517032505105 0.00225522413958322 0.00157132801671773 IFI16/IFITM3/IFITM2/IFITM1/STAT1/AIM2/IRF1/IFNAR2/MNDA/PYHIN1/XAF1/BST2 12

BP GO:0046457 prostanoid biosynthetic process 12/2416 31/18862 0.000253517032505105 0.00225522413958322 0.00157132801671773 EDN2/IL1B/TBXAS1/ANXA1/CD74/EDN1/PTGDS/PTGES/MIF/PTGS2/HPGDS/AKR1C3 12

BP GO:0062207 regulation of pattern recognition receptor signaling pathway 27/2416 105/18862 0.000253523519047107 0.00225522413958322 0.00157132801671773 IRAK3/LYN/BIRC3/SEC14L1/NOD2/IRF1/SLC15A3/APPL2/CAV1/LY96/TLR2/FCRL3/LTF/TLR1/CD36/IRF4/LILRA2/CD300LF/CD300A/CD14/TSPAN6/IFI35/F2RL1/TNFAIP3/SLC15A2/GRAMD4/TLR4 27

BP GO:0032874 positive regulation of stress-activated MAPK cascade 29/2416 116/18862 0.000257505769135819 0.00228647492526439 0.00159310200992017 MAP3K5/IL1B/ZC3H12A/RELL1/NOD2/IL26/UNC5CL/RIPK2/RASGRP1/SLAMF1/CD27/SH3RF3/CCL21/FCGR2B/CCL19/CCR7/SPI1/RASSF2/DUSP22/TNFSF11/TRAF1/SPHK1/TNF/WNT5A/SH3RF1/F2RL1/SH3RF2/TLR4/XDH 29

BP GO:0071622 regulation of granulocyte chemotaxis 16/2416 49/18862 0.000258187520923311 0.00228647492526439 0.00159310200992017 NOD2/RAC2/CD74/EDN1/RARRES2/DAPK2/CCL21/NCKAP1L/CXCL17/CCL19/CCR7/CSF1R/IL23A/C3AR1/C5AR1/S100A7 16

BP GO:0120178 steroid hormone biosynthetic process 16/2416 49/18862 0.000258187520923311 0.00228647492526439 0.00159310200992017 HSD3B2/DHRS11/HSD17B2/PPARGC1A/ADM/CLCN2/DGKQ/SRD5A3/HSD17B3/EGR1/HSD17B11/FDX1/BMP5/AKR1B1/HSD17B8/SRD5A1 16

BP GO:0046330 positive regulation of JNK cascade 23/2416 84/18862 0.000265667097868891 0.00234922240845488 0.00163682133545647 MAP3K5/IL1B/NOD2/UNC5CL/RIPK2/RASGRP1/SLAMF1/CD27/SH3RF3/CCL21/FCGR2B/CCL19/CCR7/RASSF2/DUSP22/TNFSF11/TRAF1/TNF/WNT5A/SH3RF1/F2RL1/SH3RF2/TLR4 23

BP GO:0002825 regulation of T-helper 1 type immune response 11/2416 27/18862 0.000270122127430527 0.00238119515117253 0.00165909835241534 IL1B/ANXA1/IL33/IL18R1/IL12RB1/CD80/RIPK2/CCL19/IL27RA/IL1R1/IL23A 11

BP GO:0045671 negative regulation of osteoclast differentiation 11/2416 27/18862 0.000270122127430527 0.00238119515117253 0.00165909835241534 PIAS3/LILRB1/UBASH3B/LILRB3/FBN1/GPR137B/LTF/LILRB4/MAFB/FBXW7/TLR4 11

BP GO:0015908 fatty acid transport 35/2416 150/18862 0.000270812833173429 0.00238119515117253 0.00165909835241534 PLA2G2A/CPT1A/CYP4F2/SLC25A20/PLA2G12B/CPT2/IL1B/ANXA1/PPFIA3/CROT/PPARG/GJA1/FABP3/SLC7A11/PRAF2/EDN1/KMO/PTGES/STXBP1/PLA2G12A/ACSL4/PLA2G2D/SLC1A3/ABCD3/CD36/KCNJ10/SLC27A4/TNFSF11/FABP1/P2RX4/SLC27A2/SLC1A1/ACSL1/FABP4/MAP2K6 35

BP GO:0002832 negative regulation of response to biotic stimulus 26/2416 100/18862 0.000270880924915265 0.00238119515117253 0.00165909835241534 IRAK3/IFI16/MMP12/SERPING1/SEC14L1/SERPINB9/PPARG/LILRB1/MIR21/MICB/HTRA1/SLAMF8/IL2RA/CR1/NMI/SPINK5/DUSP10/LTF/CARD8/LILRA2/NLRC5/NLRC3/TRAFD1/PARP14/TSPAN6/TNFAIP3 26

BP GO:0002712 regulation of B cell mediated immunity 17/2416 54/18862 0.000274896764971157 0.00240571603044131 0.00167618328154203 C4BPB/C3/CD40/NOD2/PTPRC/CR1/BTK/C4BPA/CLCF1/FCGR2B/MAD2L2/IL27RA/TNFSF13/LTA/BCL6/TNF/PTPN6 17

BP GO:0002889 regulation of immunoglobulin mediated immune response 17/2416 54/18862 0.000274896764971157 0.00240571603044131 0.00167618328154203 C4BPB/C3/CD40/NOD2/PTPRC/CR1/BTK/C4BPA/CLCF1/FCGR2B/MAD2L2/IL27RA/TNFSF13/LTA/BCL6/TNF/PTPN6 17

BP GO:0070228 regulation of lymphocyte apoptotic process 17/2416 54/18862 0.000274896764971157 0.00240571603044131 0.00167618328154203 LYN/HIF1A/IDO1/EFNA1/CD274/IL7R/CD74/GIMAP8/ST3GAL1/BTK/ADA/DOCK8/CD27/BCL6/CD3G/PRKCQ/WNT5A 17

BP GO:0001892 embryonic placenta development 22/2416 79/18862 0.000275688598790505 0.00240571603044131 0.00167618328154203 FGFR2/PLCD3/HIF1A/EOMES/ADM/SOCS3/JUNB/CEBPB/FZD5/RSPO3/OVOL2/CEBPA/LEF1/BMP7/CDX2/BMP5/SPINT1/PKD2/LIF/GRHL2/PHLDA2/WNT2 22

BP GO:0070830 bicellular tight junction assembly 22/2416 79/18862 0.000275688598790505 0.00240571603044131 0.00167618328154203 CLDN2/PECAM1/RAMP2/MPP7/CLDN15/ESAM/GJA1/CLDN1/MARVELD3/CDH5/FZD5/CLDN8/RAB13/EPHA2/CLDN23/OCLN/PRKCH/TNF/GRHL2/CLDN7/MARVELD2/SNAI2 22

BP GO:1901605 alpha-amino acid metabolic process 42/2416 191/18862 0.000281411526665813 0.0024520653493103 0.00170847718174305 TAT/KYNU/CBS/IDO1/GLUL/ALDH18A1/SEPSECS/ACAT1/DDAH2/ASRGL1/NR1H4/DAO/AGMAT/MIR21/OTC/TDO2/SLC7A11/ALDH5A1/SLC7A7/PSAT1/TST/MPST/HNF4A/ASS1/KMO/NOS2/NAGS/DDO/AMT/IYD/SHMT2/SDSL/GOT1/ACADSB/CTH/ASPA/GFPT2/IL4I1/GPT/IDO2/CRYM/CPS1 42

BP GO:0097305 response to alcohol 49/2416 233/18862 0.000285347702416846 0.00248273329402102 0.00172984508034492 S100A8/VCAM1/FGFR2/LRP8/HSD3B2/CPT1A/GRAMD1C/RGS2/IGFBP7/SPHK2/PPARG/ICAM1/FYN/ADH6/SPARC/TNC/ALAD/CLDN1/ADCY3/SLC10A1/CD27/FOSL1/CCL21/FDX1/SOD2/CCL19/CCR7/RGS4/MAP4K1/SPI1/HPGD/ADCY6/CD14/FOS/PTGFR/BLM/INHBA/CAT/RGS19/KLF4/CCR5/AKR1C3/ADCYAP1/GGH/FOSB/SCNN1B/CLDN7/CSF3/AHR 49

BP GO:0051651 maintenance of location in cell 45/2416 209/18862 0.000287203196352937 0.00249523476714797 0.00173855548505806 LCN2/S100A8/HSPA5/CXCL9/THY1/LYN/KDELR3/SRI/CHCHD10/ANK3/S100A9/CX3CL1/TMEM38B/HSP90B1/GJA1/SLC25A23/UBASH3B/PTPRC/APLNR/CXCL10/CXCL11/SCIN/VPS13A/CORO1A/CALR/PINK1/TRPV1/CLIC2/CAV1/ITPR1/LCK/CCL21/CCL19/CCR7/DBN1/TMEM38A/SRGN/PLCG2/CD19/FGF2/MCOLN2/PTPN6/PKD2/CCR5/DHRS7C 45

BP GO:0002534 cytokine production involved in inflammatory response 20/2416 69/18862 0.000288117314412691 0.0024958999911332 0.001739018980046 HIF1A/ZC3H12A/NOD2/MIR21/GBP5/SIRPA/PDCD4/GPSM3/APPL2/NOS2/STAT3/LILRB4/NLRP7/NLRC3/TNF/IL6/TLR4/APOD/IL1R2/H19 20

BP GO:0042446 hormone biosynthetic process 20/2416 69/18862 0.000288117314412691 0.0024958999911332 0.001739018980046 DUOX2/HSD3B2/DHRS11/HIF1A/HSD17B2/PPARGC1A/ADM/CLCN2/DGKQ/SRD5A3/HSD17B3/EGR1/DIO3/HSD17B11/FDX1/BMP5/CYP27B1/AKR1B1/HSD17B8/SRD5A1 20

BP GO:0110148 biomineralization 37/2416 162/18862 0.000289462923593395 0.0025039173071359 0.00174460504709487 ANKH/ENPP1/FGFR2/HIF1A/FGR/SNX10/GREM1/COL1A2/FGFR3/ACVR2A/TMEM38B/TWIST1/SLC20A1/CNNM4/CEBPB/MGP/SLC24A3/BMP7/FAM20A/DDR2/COL1A1/S1PR1/LTF/SRGN/CYP27B1/PKDCC/CCR1/TUFT1/SPP1/ISG15/TRPM4/ECM1/MINPP1/TCIRG1/TMEM119/PTHLH/OSR1 37

BP GO:0002431 Fc receptor mediated stimulatory signaling pathway 34/2416 145/18862 0.000298161519779041 0.00257542414185954 0.00179442745313245 LYN/IGKC/FGR/IGLV2-23/IGLV3-19/FYN/PTPRC/IGLV1-44/VAV3/ELMO1/VAV1/APPL2/IGLV6-57/WIPF1/FCER1G/IGHG1/ARPC1B/FCGR2B/NCKAP1L/IGKV3-20/IGKV4-1/WASL/NR4A3/IGHV1-69/WIPF2/WAS/HCK/PLCG2/FCGR1A/CD3G/CD247/IGKV1-5/FCGR2A/HSP90AB1 34

BP GO:0018958 phenol-containing compound metabolic process 27/2416 106/18862 0.000299270531316263 0.002581262469819 0.00179849530968491 DUOX2/DUOXA2/CDH3/CTSK/OPN3/SLC45A2/DUOXA1/SULT1A2/ITGB2/DAO/SLC7A11/SULT1A1/DDC/MAOA/SLC16A2/DIO3/IYD/ZEB2/AKR1B1/NR4A2/SRD5A1/WNT5A/SULT1B1/HDC/TPH1/TYRP1/CRYM 27

BP GO:0045637 regulation of myeloid cell differentiation 53/2416 258/18862 0.000304209975595983 0.0026200743562891 0.00182553750186515 LYN/HOXA9/HIF1A/HLA-DRB1/HCLS1/ACVR2A/PIAS3/STAT1/HOXA5/LILRB1/UBASH3B/HOXA7/LILRB3/FBN1/CD74/PF4/SCIN/CEBPB/CSF3R/LEF1/STAT3/GPR137B/HMGB3/ETS1/EVI2B/NCKAP1L/NME1/GPR171/LTF/SPI1/LILRB4/RASSF2/NR4A3/IL23A/TYROBP/CA2/CCR1/TNFSF11/MAFB/PRKCQ/ISG15/TNF/FBXW7/FOS/NFKBIA/LIF/INHBA/ZFP36/MYL9/MEIS1/IFNG/TLR4/CSF3 53

BP GO:0043368 positive T cell selection 13/2416 36/18862 0.00031713939879133 0.00272749035612746 0.00190037962820961 PTPRC/SLAMF6/CD74/IL12RB1/STAT3/CD3D/IL23A/IRF4/BATF/CD3G/CD3E/LY9/IL6 13

BP GO:0030278 regulation of ossification 28/2416 112/18862 0.000326098114205992 0.00279646728153628 0.00194843931926185 ANKH/ENPP1/HIF1A/GREM1/ACVR2A/TWIST1/PBX1/MGP/BMP7/DDR2/S1PR1/CHSY1/LTF/EGR2/SRGN/CYP27B1/PKDCC/CCR1/SMAD7/ISG15/TRPM4/ECM1/WNT5A/LRP4/TMEM119/TPH1/DKK1/OSR1 28

BP GO:0051209 release of sequestered calcium ion into cytosol 28/2416 112/18862 0.000326098114205992 0.00279646728153628 0.00194843931926185 CXCL9/THY1/LYN/SRI/CX3CL1/TMEM38B/UBASH3B/PTPRC/APLNR/CXCL10/CXCL11/CORO1A/TRPV1/CLIC2/ITPR1/LCK/CCL21/CCL19/CCR7/TMEM38A/PLCG2/CD19/FGF2/MCOLN2/PTPN6/PKD2/CCR5/DHRS7C 28

BP GO:0038094 Fc-gamma receptor signaling pathway 33/2416 140/18862 0.000327931614285229 0.00280815003037352 0.00195657927760924 LYN/IGKC/FGR/IGLV2-23/IGLV3-19/FYN/PTPRC/IGLV1-44/VAV3/ELMO1/VAV1/APPL2/IGLV6-57/WIPF1/FCER1G/IGHG1/ARPC1B/FCGR2B/NCKAP1L/IGKV3-20/IGKV4-1/WASL/IGHV1-69/WIPF2/WAS/HCK/PLCG2/FCGR1A/CD3G/CD247/IGKV1-5/FCGR2A/HSP90AB1 33

BP GO:0032868 response to insulin 56/2416 278/18862 0.000351719336632234 0.0030075283304564 0.0020954961610121 ENPP1/PDK2/EIF4EBP2/LYN/RAB31/LPIN1/PIK3R3/PCK2/SLC25A33/IL1B/ADM/IRS1/PPARG/ICAM1/NR1H4/XBP1/PCK1/SOCS3/OTC/SOCS1/FABP3/INSR/CFLAR/GAB1/ACVR1C/OSBPL8/APPL2/RARRES2/EEF2K/RAB13/UCP2/EGR1/PDK4/FOXO4/SCAP/RHOQ/GNAI2/TLR2/GOT1/EGR2/LPL/RAB8B/SLC27A4/PRKCQ/SRD5A1/BCAR3/HSD11B2/GCNT1/GPT/CAT/ATP6V0D2/CAV2/GGH/GRB14/TCIRG1/ERRFI1 56

BP GO:0060402 calcium ion transport into cytosol 35/2416 152/18862 0.00035376731826781 0.00301045149146275 0.00209753287421768 CXCL9/THY1/LYN/SRI/CX3CL1/TMEM38B/FYN/UBASH3B/PTPRC/APLNR/CXCL10/CXCL11/RAMP3/CORO1A/TRPV1/CLIC2/CAV1/ITPR1/P2RX5/LCK/CCL21/CCL19/CCR7/TMEM38A/PLCG2/CD19/MS4A1/FGF2/MCOLN2/P2RX4/FAM155A/PTPN6/PKD2/CCR5/DHRS7C 35

BP GO:0031649 heat generation 8/2416 16/18862 0.000354081626764326 0.00301045149146275 0.00209753287421768 IL1B/PTGES/APLN/IL1A/PTGS2/TNFSF11/TNF/NMU 8

BP GO:0045346 regulation of MHC class II biosynthetic process 8/2416 16/18862 0.000354081626764326 0.00301045149146275 0.00209753287421768 XBP1/IL33/PF4/JAK2/CIITA/SPI1/IFNG/TLR4 8

BP GO:0070365 hepatocyte differentiation 8/2416 16/18862 0.000354081626764326 0.00301045149146275 0.00209753287421768 PCK2/ANXA1/PCK1/HNF4A/HNF1B/ITGA2/FRZB/CPS1 8

BP GO:0045089 positive regulation of innate immune response 47/2416 223/18862 0.000356280111033294 0.00302482829310318 0.00210754991456942 IFI16/MMP12/PSMB9/PARP9/LYN/ZBP1/ICAM2/NOD2/FYN/AIM2/GBP5/MUC1/CADM1/SLAMF6/MNDA/VAV1/PYHIN1/CLEC4E/SH2D1A/RASGRP1/FCN1/FCER1G/MALT1/NMI/PSMB8/CLEC4A/MAVS/CD160/TYROBP/HCK/PLCG2/LILRA2/CRTAM/PRKACB/NLRC5/TLR8/WNT5A/CD1D/IFI35/LAG3/MUC20/IL18RAP/CLEC4D/TLR4/PSMA8/FPR2/MUCL1 47

BP GO:0032673 regulation of interleukin-4 production 12/2416 32/18862 0.000358671336207361 0.00302848948175917 0.00211010084873541 HLA-DRB1/SLC7A5/IL33/SASH3/CD86/CEBPB/LEF1/FCER1G/CD83/IRF4/PRKCQ/CD3E 12

BP GO:0035590 purinergic nucleotide receptor signaling pathway 12/2416 32/18862 0.000358671336207361 0.00302848948175917 0.00211010084873541 PTAFR/P2RY1/P2RY13/ADA/P2RY8/P2RX5/GNAI2/GPR171/P2RX4/ADORA3/ADORA2B/P2RY14 12

BP GO:0090022 regulation of neutrophil chemotaxis 12/2416 32/18862 0.000358671336207361 0.00302848948175917 0.00211010084873541 NOD2/RAC2/CD74/EDN1/DAPK2/CCL21/NCKAP1L/CCL19/CCR7/IL23A/C3AR1/C5AR1 12

BP GO:0071384 cellular response to corticosteroid stimulus 18/2416 60/18862 0.000358743888275499 0.00302848948175917 0.00211010084873541 PCK2/ANXA1/ICAM1/PCK1/CFLAR/DDIT4/EDN1/ASS1/SERPINF1/STC1/GJB2/SRD5A1/ZFP36/AQP1/AKR1C3/ADCYAP1/SCNN1B/ERRFI1 18

BP GO:0050691 regulation of defense response to virus by host 14/2416 41/18862 0.000368186521753098 0.00309763662421335 0.00215827913855911 MMP12/PARP9/TRAF3IP2/ZC3H12A/STAT1/LILRB1/AIM2/MICB/IL12RB1/APOBEC3G/IL23A/MAVS/TNFAIP3/ZDHHC11 14

BP GO:0072524 pyridine-containing compound metabolic process 14/2416 41/18862 0.000368186521753098 0.00309763662421335 0.00215827913855911 NNMT/PARP9/KYNU/IDO1/NMNAT3/PSAT1/KMO/NAMPT/NMNAT1/PTGS2/PNP/NUDT12/IDO2/AOX1 14

BP GO:0051090 regulation of DNA-binding transcription factor activity 82/2416 444/18862 0.000368494021236118 0.00309763662421335 0.00215827913855911 IRAK3/S100A8/ENPP1/LRP8/SRI/IL1B/GREM1/TRIM22/HCLS1/EOMES/SIK1/ZC3H12A/PPARGC1A/CD40/S100A9/CX3CL1/PPARG/ICAM1/ITGB2/NOD2/NR1H4/MIR21/AIM2/TWIST1/BHLHE40/CFLAR/IL18R1/SMARCB1/EDN1/JAK2/CRTC3/AGT/PINK1/RIPK2/STAT3/BTK/CAV1/CLU/BMP7/S100A12/FOSL1/MALT1/DDR2/MAD2L2/ANXA3/TLR2/LTF/WFS1/NFKBIE/CD36/MAVS/TCEAL7/HCK/CARD8/TNFSF11/TRAF1/PRKCH/CTH/NLRC5/NLRC3/PRKCQ/SMAD7/SPHK1/TNF/FOS/NFKBIA/FLNA/WNT5A/PKD2/IL6/CAT/IL18RAP/TNFAIP3/KLF4/GLIS2/NDP/TLR4/ADORA3/WNT2/FANK1/CSF3/RELN 82

BP GO:1903034 regulation of response to wounding 37/2416 164/18862 0.000373394818232061 0.00313441284037054 0.00218390297690953 DUOX2/SERPING1/ANXA1/FERMT2/XBP1/GJA1/MIR21/UBASH3B/VIL1/PLAU/F3/PLAUR/CD34/THBD/CLDN1/TFPI/EDN1/PTPRF/REG3A/APOH/FAP/CAV1/CXCR4/CD36/OCLN/FGF2/SPP1/TNFRSF12A/TNF/FLNA/KLKB1/ST3GAL4/SERPINE1/F2RL1/TNFAIP3/KLF4/SH2B3 37

BP GO:0045639 positive regulation of myeloid cell differentiation 26/2416 102/18862 0.000379092310214313 0.00317776395060099 0.00221410787444735 HIF1A/HLA-DRB1/HCLS1/ACVR2A/STAT1/HOXA5/CD74/PF4/SCIN/LEF1/STAT3/ETS1/EVI2B/NCKAP1L/IL23A/TYROBP/CA2/CCR1/TNFSF11/ISG15/TNF/FOS/LIF/INHBA/IFNG/CSF3 26

BP GO:0051283 negative regulation of sequestering of calcium ion 28/2416 113/18862 0.000381362419133178 0.00319230339611481 0.00222423823696095 CXCL9/THY1/LYN/SRI/CX3CL1/TMEM38B/UBASH3B/PTPRC/APLNR/CXCL10/CXCL11/CORO1A/TRPV1/CLIC2/ITPR1/LCK/CCL21/CCL19/CCR7/TMEM38A/PLCG2/CD19/FGF2/MCOLN2/PTPN6/PKD2/CCR5/DHRS7C 28

BP GO:0031348 negative regulation of defense response 49/2416 236/18862 0.000389521461020415 0.00325602792101217 0.00226863831656535 IRAK3/IFI16/MMP12/SERPING1/HLA-DRB1/SEC14L1/SERPINB9/CX3CL1/CST7/PPARG/NOD2/NR1H4/LILRB1/SOCS3/MIR21/SIRPA/PTPRC/SYT11/MICB/TNFRSF1B/HTRA1/TEK/CDH5/SLAMF8/IL2RA/LRFN5/CR1/SERPINF1/ADA/TNFAIP8L2/NMI/SPINK5/FCGR2B/HGF/DUSP10/CXCL17/TNFAIP6/NLRC5/NLRC3/TRAFD1/PARP14/ENPP3/TSPAN6/CALCRL/TNFAIP3/KLF4/ADCYAP1/FOXF1/FPR2 49

BP GO:0001782 B cell homeostasis 11/2416 28/18862 0.000393716757158148 0.0032727362240761 0.00228027983115158 LYN/HIF1A/SPNS2/TNFSF13B/CD74/DOCK11/ADA/NCKAP1L/PKN1/TNFAIP3/GAPT 11

BP GO:0002507 tolerance induction 11/2416 28/18862 0.000393716757158148 0.0032727362240761 0.00228027983115158 IRAK3/LYN/IDO1/LILRB2/CD274/ICOS/IL2RA/LILRB4/CD3E/PHLPP1/TNFAIP3 11

BP GO:0010575 positive regulation of vascular endothelial growth factor production 11/2416 28/18862 0.000393716757158148 0.0032727362240761 0.00228027983115158 HIF1A/IL1B/C3/SULF1/SULF2/CXCL17/IL1A/PTGS2/C3AR1/C5AR1/IL6 11

BP GO:0032703 negative regulation of interleukin-2 production 11/2416 28/18862 0.000393716757158148 0.0032727362240761 0.00228027983115158 GBP1/NOD2/NR1H4/LAPTM5/PTPRC/CD34/CR1/LILRB4/LAG3/ZFP36/TNFAIP3 11

BP GO:0019751 polyol metabolic process 31/2416 130/18862 0.000395265005714271 0.00328102985244715 0.00228605841891629 NAAA/INPP5J/PLCD3/ITPKA/PLCD1/PCK2/IMPA2/SPHK2/PLCE1/IP6K2/PCK1/PTAFR/BPNT1/CYP27A1/P2RY1/SORD/PLEK/COQ3/OCRL/CYP3A4/GOT1/MOGAT2/SPR/PLCG2/CYP27B1/AKR1B1/FGF2/SPHK1/DEGS2/MOGAT3/MINPP1 31

BP GO:0060761 negative regulation of response to cytokine stimulus 22/2416 81/18862 0.000404904798538921 0.00332687947117268 0.00231800415290997 IRAK3/MMP12/PADI2/PPARG/NR1H4/ROBO1/MIR21/PTPRC/IL1RN/CCDC3/CAV1/PXDN/CARD8/NLRC5/PARP14/ECM1/IL6/F2RL1/KLF4/SH2B3/IL1R2/STAP1 22

BP GO:0120192 tight junction assembly 22/2416 81/18862 0.000404904798538921 0.00332687947117268 0.00231800415290997 CLDN2/PECAM1/RAMP2/MPP7/CLDN15/ESAM/GJA1/CLDN1/MARVELD3/CDH5/FZD5/CLDN8/RAB13/EPHA2/CLDN23/OCLN/PRKCH/TNF/GRHL2/CLDN7/MARVELD2/SNAI2 22

BP GO:0002577 regulation of antigen processing and presentation 9/2416 20/18862 0.000405685278393601 0.00332687947117268 0.00231800415290997 LILRB2/NOD2/CD74/HLA-DOB/CCL21/FCGR2B/CCL19/CCR7/WAS 9

BP GO:0046697 decidualization 9/2416 20/18862 0.000405685278393601 0.00332687947117268 0.00231800415290997 BSG/GJA1/VDR/JUNB/STC1/CYP27B1/GJB2/SPP1/LIF 9

BP GO:0070233 negative regulation of T cell apoptotic process 9/2416 20/18862 0.000405685278393601 0.00332687947117268 0.00231800415290997 HIF1A/IDO1/EFNA1/IL7R/ST3GAL1/ADA/DOCK8/CD27/PRKCQ 9

BP GO:0090026 positive regulation of monocyte chemotaxis 9/2416 20/18862 0.000405685278393601 0.00332687947117268 0.00231800415290997 CXCL10/PLA2G7/CXCL17/AIF1/CCR1/SERPINE1/S100A7/FPR2/CXCL12 9

BP GO:1903978 regulation of microglial cell activation 9/2416 20/18862 0.000405685278393601 0.00332687947117268 0.00231800415290997 CX3CL1/CST7/CTSC/PTPRC/SYT11/LRRK2/SPHK1/IL6/STAP1 9

BP GO:0050798 activated T cell proliferation 15/2416 46/18862 0.000405812311332641 0.00332687947117268 0.00231800415290997 FYN/MIR21/CD274/BTN3A1/IL2RA/IL12RB1/BTN2A2/HHLA2/LRRC32/IL27RA/TNFSF9/LILRB4/IL23A/CRTAM/PRKAR1A 15

BP GO:0050873 brown fat cell differentiation 15/2416 46/18862 0.000405812311332641 0.00332687947117268 0.00231800415290997 PEX11A/RGS2/PPARGC1A/FABP3/VSTM2A/ALDH6A1/CEBPB/CEBPA/BMP7/DUSP10/PTGS2/NAPEPLD/LRG1/BNIP3/FABP4 15

BP GO:0051403 stress-activated MAPK cascade 53/2416 261/18862 0.000407783546327457 0.00333844771443907 0.00232606432947053 MAP3K5/IL1B/ZC3H12A/RELL1/STRADB/NOD2/SIRPA/MLKL/DNAJA1/SH2D3C/IL26/MARVELD3/PDCD4/UNC5CL/MAPKAPK2/ARHGEF6/PINK1/RIPK2/RASGRP1/MAP3K8/SLAMF1/CD27/SH3RF3/MAGI3/TNIK/CCL21/MAP4K4/FCGR2B/HGF/DUSP10/CCL19/CCR7/MAP4K1/SPI1/RASSF2/DUSP22/PKN1/TNFSF11/TRAF1/SPHK1/TNF/WNT5A/SH3RF1/ZFP36/PHLPP1/F2RL1/SERPINB3/SH3RF2/TLR4/ADORA2B/XDH/SFRP2/CDC42EP5 53

BP GO:0060669 embryonic placenta morphogenesis 10/2416 24/18862 0.000413610491970314 0.00337938092998128 0.00235458455824376 FGFR2/ADM/SOCS3/FZD5/RSPO3/LEF1/BMP7/BMP5/SPINT1/GRHL2 10

BP GO:0051092 positive regulation of NF-kappaB transcription factor activity 36/2416 159/18862 0.000413917462900392 0.00337938092998128 0.00235458455824376 IRAK3/S100A8/IL1B/GREM1/TRIM22/CD40/S100A9/CX3CL1/ICAM1/ITGB2/NOD2/AIM2/CFLAR/IL18R1/AGT/RIPK2/STAT3/BTK/CAV1/CLU/S100A12/MALT1/TLR2/LTF/CD36/TNFSF11/TRAF1/PRKCH/CTH/PRKCQ/SPHK1/TNF/WNT5A/CAT/IL18RAP/TLR4 36

BP GO:0048545 response to steroid hormone 64/2416 330/18862 0.000415713442531621 0.00338940098151636 0.00236156603180538 TAT/HSD3B2/ESRRA/PCK2/PMEPA1/ANXA1/RAMP2/IGFBP7/TRERF1/PADI2/ADM/ICAM1/PCK1/PTAFR/PAM/SPARC/CFLAR/ALAD/DNAJA1/DDIT4/CATSPERB/CLDN1/CD38/TFPI/EDN1/HNMT/IL1RN/JAK2/ASS1/CALR/LEF1/SERPINF1/FIBIN/STC1/CAV1/BMP7/FOSL1/COL1A1/ANXA3/TLR2/PAQR8/GOT1/NR4A3/CA2/GJB2/NR3C2/SPP1/SRD5A1/ENG/HSD11B2/TNF/FOS/ZFP36/IL6/ADAM9/AQP1/AKR1C3/BCHE/ADCYAP1/FOSB/SCNN1B/ERRFI1/SCGB2A1/CPS1 64

BP GO:0048872 homeostasis of number of cells 51/2416 249/18862 0.000420418550921917 0.00342308000477408 0.00238503190018258 PLA2G2A/LYN/HIF1A/ANXA1/HCLS1/ACVR2A/STAT1/GPR183/CXCL6/HOXA5/SPNS2/TNFSF13B/FSTL1/IL7R/SLC7A11/FLVCR1/CD74/SASH3/PDE4B/IL2RA/DOCK11/CORO1A/JAK2/LRRC19/STAT3/ADA/ETS1/HOXB6/IKZF1/NCKAP1L/CCR7/SPI1/RASSF2/PIK3CD/PKN1/BCL6/NAPEPLD/PMAIP1/MAFB/ISG15/SIT1/INHBA/ZFP36/IL6/TNFAIP3/GLIS2/EMCN/SH2B3/GAPT/TCIRG1/TNFRSF17 51

BP GO:0001960 negative regulation of cytokine-mediated signaling pathway 21/2416 76/18862 0.000422104714805008 0.00343212019132039 0.00239133065255368 IRAK3/MMP12/PADI2/PPARG/NR1H4/ROBO1/MIR21/PTPRC/IL1RN/CCDC3/CAV1/PXDN/CARD8/NLRC5/PARP14/ECM1/IL6/F2RL1/SH2B3/IL1R2/STAP1 21

BP GO:1904645 response to amyloid-beta 16/2416 51/18862 0.00043073699107676 0.00349753742073227 0.00243691012447701 MMP3/VCAM1/MMP12/CASP4/MMP9/ICAM1/FYN/GJA1/RAMP3/ABCC1/FCGR2B/CD36/ITGA4/TLR4/FPR2/MMP13 16

BP GO:2000403 positive regulation of lymphocyte migration 13/2416 37/18862 0.000432076510721815 0.0035036408216354 0.0024411626706732 CXCL10/CXCL13/CCL20/CCL4/DOCK8/MADCAM1/CCL21/AIF1/ITGA4/WNT5A/JAM2/S100A7/CXCL12 13

BP GO:0032355 response to estradiol 30/2416 125/18862 0.000433050196898809 0.00350676518140883 0.00244333956917306 ANXA1/RAMP2/PPARGC1A/GJA1/PAM/CFLAR/PDGFRB/RAMP3/SSTR1/CD38/TFPI/ASS1/CALR/STAT3/STXBP1/BMP7/ETS1/ARPC1B/IHH/COL1A1/ALDH1A2/HPGD/GJB2/SRD5A1/GGT5/PTGFR/ITGA2/CAT/NRIP1/ENDOG 30

BP GO:0050818 regulation of coagulation 20/2416 71/18862 0.000436005194968187 0.0035144898826741 0.00244872175682609 ANXA5/SERPING1/UBASH3B/PLAU/F3/PLAUR/CD34/THBD/TFPI/EDN1/APOH/FAP/CAV1/CD36/PROCR/KLKB1/ST3GAL4/SERPINE1/F2RL1/SH2B3 20

BP GO:0070227 lymphocyte apoptotic process 20/2416 71/18862 0.000436005194968187 0.0035144898826741 0.00244872175682609 LYN/HIF1A/IDO1/TRAF3IP2/EFNA1/CD274/IL7R/CD74/GIMAP8/IL2RA/ST3GAL1/BTK/ADA/DOCK8/CD27/PKN1/BCL6/CD3G/PRKCQ/WNT5A 20

BP GO:0001936 regulation of endothelial cell proliferation 39/2416 177/18862 0.000436362837781683 0.0035144898826741 0.00244872175682609 SEMA5A/HIF1A/CCL11/TNMD/SULF1/STAT1/PPARG/CCL2/GJA1/VEGFC/MIR21/SPARC/F3/APLNR/TEK/PPP1R16B/TIE1/EGR3/APOH/CAV1/KDR/PTPRM/ALDH1A2/APLN/FUT1/PIK3CD/FGF2/LRG1/NRARP/ITGA4/TNF/ECM1/WNT5A/STAT5A/CAV2/XDH/CCR3/WNT2/CXCL12 39

BP GO:0008217 regulation of blood pressure 39/2416 177/18862 0.000436362837781683 0.0035144898826741 0.00244872175682609 NPY1R/TRHDE/NPY/EDN2/CYP4F2/RAMP2/COL1A2/ADM/ANPEP/PPARG/GJA1/VEGFC/PTAFR/ARHGAP42/CAMK2N1/CYP4F12/CD34/KLK3/EDN1/MME/EDN3/AGT/RARRES2/NOS2/AGTRAP/EDNRA/SOD2/APLN/PTGS2/KLK1/P2RX4/HSD11B2/KCNK6/CPA3/F2RL1/ACSM3/ERAP2/NMU/CHGA 39

BP GO:0046456 icosanoid biosynthetic process 17/2416 56/18862 0.000444451723389046 0.00357480738380393 0.00249074799171786 EDN2/IL1B/TBXAS1/ANXA1/FADS1/CD74/EDN1/PTGDS/PTGES/MIF/PTGS2/HPGDS/GGT5/GGT6/AKR1C3/CYP2C9/ALOX5AP 17

BP GO:0006576 cellular biogenic amine metabolic process 26/2416 103/18862 0.000446257128146006 0.00357966686911197 0.00249413383939363 NAAA/KYNU/IDO1/SULT1A2/ITGB2/DAO/SRM/AGMAT/TDO2/OAZ2/SULT1A1/DDC/SLC44A1/HNMT/KMO/MAOA/CHKA/GDPD3/AKR1B1/NAPEPLD/CHDH/NR4A2/SULT1B1/IDO2/HDC/TPH1 26

BP GO:0031532 actin cytoskeleton reorganization 26/2416 103/18862 0.000446257128146006 0.00357966686911197 0.00249413383939363 ANXA1/HCLS1/ESAM/ARHGDIB/GDPD2/IQGAP2/GAB1/TEK/GMFG/PARVG/PLEK/GPR65/SEMA3E/CDC42BPA/BAIAP2L2/TNIK/THSD7A/S1PR1/PARVB/CSF1R/HCK/FLNA/PDLIM4/CXADR/STAP1/CSF3 26

BP GO:0051048 negative regulation of secretion 36/2416 160/18862 0.000469402389175479 0.00375636468513886 0.00261724808952186 PIM3/CYP4F2/IL1B/ANXA1/IRS1/LILRB1/GJA1/SYT11/ACVR1C/CD74/TNFRSF1B/KLF7/ERBB3/EDN1/P2RY1/IL13RA2/ADA/UCP2/FCGR2B/GNAI2/RHBDF2/TIFAB/CD300A/NRG1/WNK4/LIF/INHBA/HMGCR/SLC30A1/VSNL1/FOXF1/OSM/IL11/TFF2/NMU/CHGA 36

BP GO:0032970 regulation of actin filament-based process 73/2416 389/18862 0.000469545585642357 0.00375636468513886 0.00261724808952186 SEMA5A/PDPN/SRI/CCL11/CNN2/ASAP3/HCLS1/FERMT2/CX3CL1/ESAM/EFNA5/ICAM1/ARHGDIB/IQGAP2/MIR21/TACSTD2/PAM/RAC2/VIL1/FSCN1/PDGFRB/COTL1/SORBS3/PDE4B/TEK/SCIN/EDN1/CORO1A/GMFG/PLEK/STC1/CAV1/RHOH/SPIRE2/GPR65/SEMA3E/ARPC1B/BAIAP2L2/CCL21/NCKAP1L/RHOQ/CCR7/RGS4/DBN1/S1PR1/KANK4/WASL/PREX1/SHANK3/WAS/CSF1R/ARHGEF10L/HCK/WASF1/BST2/SWAP70/TRPM4/EVL/MYADM/FLNA/KCNJ2/DSC2/FZD10/F2RL1/MIR214/DSP/RND1/SH3BP1/PFN2/STAP1/CXCL12/CSF3/CDC42EP5 73

BP GO:0006857 oligopeptide transport 7/2416 13/18862 0.000474805765118717 0.00375809078367537 0.00261845074913446 GJA1/SLC9A3R1/SLC7A11/SLC15A3/ABCC1/CA2/SLC15A2 7

BP GO:0007494 midgut development 7/2416 13/18862 0.000474805765118717 0.00375809078367537 0.00261845074913446 OTC/REG1A/ASS1/ALDH1A2/WNT5A/FOXF1/CPS1 7

BP GO:0016264 gap junction assembly 7/2416 13/18862 0.000474805765118717 0.00375809078367537 0.00261845074913446 IL1B/GJA1/AGT/GJB1/CAV1/GJC1/GJB2 7

BP GO:0019627 urea metabolic process 7/2416 13/18862 0.000474805765118717 0.00375809078367537 0.00261845074913446 NR1H4/OTC/ASS1/CEBPA/NAGS/CYP2C9/CPS1 7

BP GO:0031650 regulation of heat generation 7/2416 13/18862 0.000474805765118717 0.00375809078367537 0.00261845074913446 IL1B/PTGES/APLN/PTGS2/TNFSF11/TNF/NMU 7

BP GO:0071941 nitrogen cycle metabolic process 7/2416 13/18862 0.000474805765118717 0.00375809078367537 0.00261845074913446 NR1H4/OTC/ASS1/CEBPA/NAGS/CYP2C9/CPS1 7

BP GO:1902947 regulation of tau-protein kinase activity 7/2416 13/18862 0.000474805765118717 0.00375809078367537 0.00261845074913446 CLU/EGR1/HGF/C5AR1/IFNG/HSP90AB1/DKK1 7

BP GO:1903236 regulation of leukocyte tethering or rolling 7/2416 13/18862 0.000474805765118717 0.00375809078367537 0.00261845074913446 SELP/PTAFR/CCL21/ITGA4/ST3GAL4/SELE/CXCL12 7

BP GO:0014002 astrocyte development 14/2416 42/18862 0.000487813910189079 0.00384572870995623 0.00267951249748805 S100A8/BACE2/MT3/S100A9/VIM/TNF/C5AR1/LAMB2/IFNGR1/IL6/IFNG/TLR4/TSPAN2/FPR2 14

BP GO:0089718 amino acid import across plasma membrane 14/2416 42/18862 0.000487813910189079 0.00384572870995623 0.00267951249748805 SLC6A14/SLC36A1/RGS2/SLC7A5/SLC6A20/SLC7A11/SLC6A6/SLC16A2/SLC22A4/SLC1A3/RGS4/SLC1A4/KCNJ10/SLC1A1 14

BP GO:1900371 regulation of purine nucleotide biosynthetic process 14/2416 42/18862 0.000487813910189079 0.00384572870995623 0.00267951249748805 PDK2/SPHK2/PDZD3/PPARGC1A/GUCA2B/HPCA/NOS2/PINK1/VCP/GUCA2A/PDK4/PDP1/PDK1/H19 14

BP GO:0032633 interleukin-4 production 12/2416 33/18862 0.000498449468781078 0.00389352402874866 0.0027128138985188 HLA-DRB1/SLC7A5/IL33/SASH3/CD86/CEBPB/LEF1/FCER1G/CD83/IRF4/PRKCQ/CD3E 12

BP GO:0034368 protein-lipid complex remodeling 12/2416 33/18862 0.000498449468781078 0.00389352402874866 0.0027128138985188 LIPC/PLA2G2A/NR1H4/AGT/APOM/PLA2G7/LIPG/LPL/CETP/APOC1/APOC2/ABCA5 12

BP GO:0034369 plasma lipoprotein particle remodeling 12/2416 33/18862 0.000498449468781078 0.00389352402874866 0.0027128138985188 LIPC/PLA2G2A/NR1H4/AGT/APOM/PLA2G7/LIPG/LPL/CETP/APOC1/APOC2/ABCA5 12

BP GO:0035025 positive regulation of Rho protein signal transduction 12/2416 33/18862 0.000498449468781078 0.00389352402874866 0.0027128138985188 ARHGEF3/ROBO1/F2RL2/PDGFRB/COL3A1/P2RY8/GPR65/GPR4/F2RL1/NET1/GPR18/GPR35 12

BP GO:0035633 maintenance of blood-brain barrier 12/2416 33/18862 0.000498449468781078 0.00389352402874866 0.0027128138985188 PECAM1/LAMC1/ESAM/GJA1/CLDN1/CDH5/OCLN/SH3GL2/TJP3/IL6/JAM2/SLC1A1 12

BP GO:0046320 regulation of fatty acid oxidation 12/2416 33/18862 0.000498449468781078 0.00389352402874866 0.0027128138985188 CPT1A/ABCB11/PPARGC1A/IRS1/PPARG/TWIST1/FABP3/MLYCD/APPL2/PDK4/NR4A3/FABP1 12

BP GO:0051482 positive regulation of cytosolic calcium ion concentration involved in phospholipase C-activating G protein-coupled signaling pathway 12/2416 33/18862 0.000498449468781078 0.00389352402874866 0.0027128138985188 TGM2/GNA15/F2RL2/EDN1/P2RY8/GPR65/S1PR1/GPR4/C3AR1/F2RL1/GPR18/GPR35 12

BP GO:0008643 carbohydrate transport 34/2416 149/18862 0.000507811903796496 0.00396146458982607 0.00276015150244858 SLC23A1/AQP7/PEA15/ENPP1/OPN3/SLC45A2/IL1B/C3/IRS1/AQP11/AQP9/INSR/VIL1/SLC5A11/OSBPL8/SLC2A3/EDN1/AQP3/APPL2/SLC35D2/EDNRA/SLC2A6/RHOQ/TMEM144/NR4A3/SLC37A2/SLC27A4/OCLN/SLC35D1/SLC5A1/TNF/SLC37A4/AQP1/PPBP 34

BP GO:0031098 stress-activated protein kinase signaling cascade 55/2416 276/18862 0.000520105226070285 0.00405206163056065 0.00282327501458173 LYN/MAP3K5/IL1B/ZC3H12A/RELL1/STRADB/NOD2/SIRPA/MLKL/DNAJA1/SH2D3C/IL26/MARVELD3/PDCD4/UNC5CL/MAPKAPK2/ARHGEF6/PINK1/RIPK2/RASGRP1/MAP3K8/SLAMF1/CD27/SH3RF3/MAGI3/TNIK/CCL21/MAP4K4/FCGR2B/HGF/DUSP10/CCL19/CCR7/MAP4K1/SPI1/RASSF2/DUSP22/PKN1/AKR1B1/TNFSF11/TRAF1/SPHK1/TNF/WNT5A/SH3RF1/ZFP36/PHLPP1/F2RL1/SERPINB3/SH3RF2/TLR4/ADORA2B/XDH/SFRP2/CDC42EP5 55

BP GO:0002279 mast cell activation involved in immune response 15/2416 47/18862 0.000526216167850569 0.00407834637241794 0.00284158891543426 LYN/FGR/SPHK2/RAC2/PTGDR/IL13RA2/PTGDS/BTK/STXBP1/NR4A3/PIK3CD/CD300A/ENPP3/FOXF1/CHGA 15

BP GO:0002448 mast cell mediated immunity 15/2416 47/18862 0.000526216167850569 0.00407834637241794 0.00284158891543426 LYN/FGR/SPHK2/SERPINB9/RAC2/PTGDR/IL13RA2/PTGDS/BTK/STXBP1/NR4A3/PIK3CD/CD300A/FOXF1/CHGA 15

BP GO:0002823 negative regulation of adaptive immune response based on somatic recombination of immune receptors built from immunoglobulin superfamily domains 15/2416 47/18862 0.000526216167850569 0.00407834637241794 0.00284158891543426 C4BPB/ZC3H12A/NOD2/LILRB1/PTPRC/IL33/IL7R/CR1/C4BPA/FCGR2B/IL27RA/LILRB4/BCL6/SMAD7/PTPN6 15

BP GO:0045581 negative regulation of T cell differentiation 15/2416 47/18862 0.000526216167850569 0.00407834637241794 0.00284158891543426 ANXA1/ZC3H12A/MIR21/IRF1/SOCS1/CTLA4/CD74/IHH/RUNX3/LILRB4/BCL6/SMAD7/NRARP/LAG3/DTX1 15

BP GO:0098739 import across plasma membrane 36/2416 161/18862 0.000531385062543429 0.00411305840618031 0.00286577453415424 SLC6A14/SLC36A1/RGS2/SLC7A5/SLC39A5/KCNJ8/SLC6A20/FYN/SLC9A3R1/KCNE2/SLC7A11/RAMP3/SLC2A3/SLC6A6/SLC15A3/TRPV1/SLC16A2/SLC22A4/SLC39A4/SLC1A3/RGS4/SLC1A4/CD36/KCNJ10/SLC5A1/FAM155A/TRPM4/KCNJ2/WNK4/KCNJ15/SLC1A1/SLC15A2/IFNG/SLC30A1/ACSL1/SLC9A2 36

BP GO:0050848 regulation of calcium-mediated signaling 19/2416 67/18862 0.00054800615005375 0.00423620837136232 0.0029515793050202 PDK2/GBP1/CHP2/GPR143/ERBB3/CCL4/PLEK/ADA/ITPR1/P2RX5/DYRK2/LMCD1/LRRK2/P2RX4/TNF/TBC1D10C/CD3E/CD22/TRAT1 19

BP GO:0010565 regulation of cellular ketone metabolic process 40/2416 185/18862 0.000554795752607298 0.00428313819370401 0.00298427767116961 PDK2/CPT1A/PSMB9/ABCB11/IL1B/ANXA1/PPARGC1A/ADM/IRS1/PPARG/NR1H4/LPGAT1/MIR21/TWIST1/FABP3/MLYCD/CLCN2/OAZ2/SLC7A11/CD74/SLC7A7/DGKQ/APPL2/COQ3/CAV1/EGR1/PDK4/PSMB8/SCAP/NR4A3/PDP1/BMP5/PTGS2/FABP1/APOC1/APOC2/PDK1/AKR1C3/STARD4/PSMA8 40

BP GO:0097193 intrinsic apoptotic signaling pathway 56/2416 283/18862 0.0005568209137045 0.00428986070156602 0.00298896158030342 SHISA5/S100A8/VNN1/IFI16/PDK2/CASP4/MMP9/DNAJC10/BCL2L10/MAP3K5/HIF1A/BCL2A1/S100A9/CD44/XBP1/MIR21/MUC1/SLC9A3R1/PLAUR/CD74/DNAJA1/DDIT4/TNFRSF1B/TNFRSF10B/FNIP2/CEBPB/JAK2/HYOU1/GRINA/PINK1/SGMS1/CAV1/CLU/CHAC1/ITPR1/DAPK2/P4HB/LCK/HERPUD1/DYRK2/SOD2/FHIT/EPHA2/RNF183/LRRK2/MIF/PMAIP1/MLLT11/TNF/FBXW7/PDK1/BNIP3/ZNF385A/SFRP2/CXCL12/SNAI2 56

BP GO:0002260 lymphocyte homeostasis 17/2416 57/18862 0.000558694673636981 0.00428986070156602 0.00298896158030342 LYN/HIF1A/SPNS2/TNFSF13B/CD74/IL2RA/DOCK11/CORO1A/ADA/NCKAP1L/PKN1/PMAIP1/SIT1/TNFAIP3/GAPT/TCIRG1/TNFRSF17 17

BP GO:2000242 negative regulation of reproductive process 17/2416 57/18862 0.000558694673636981 0.00428986070156602 0.00298896158030342 TIMP1/PRDX4/SULF1/ARHGDIB/GJA1/ACVR1C/OVOL1/ZFPM2/CALR/SERPINF1/ADA/BMP7/PRKACB/WNT5A/SEMG1/LIF/PRKAR1A 17

BP GO:0001916 positive regulation of T cell mediated cytotoxicity 11/2416 29/18862 0.00056142472268817 0.00428986070156602 0.00298896158030342 HLA-DRB1/PTPRC/MR1/HLA-DRA/IL12RB1/CD1C/IL23A/CD1D/CD1A/AZGP1/CD1B 11

BP GO:0007435 salivary gland morphogenesis 11/2416 29/18862 0.00056142472268817 0.00428986070156602 0.00298896158030342 FGFR2/TGM2/TWSG1/LAMA1/PLXND1/BMP7/HGF/ESRP2/TNF/NTN4/LAMA5 11

BP GO:0009435 NAD biosynthetic process 11/2416 29/18862 0.00056142472268817 0.00428986070156602 0.00298896158030342 NNMT/PARP9/KYNU/IDO1/NMNAT3/KMO/NAMPT/NMNAT1/PTGS2/NUDT12/IDO2 11

BP GO:0010669 epithelial structure maintenance 11/2416 29/18862 0.00056142472268817 0.00428986070156602 0.00298896158030342 SLC22A5/PBLD/SERPINA3/NOD2/LDB2/TFF1/VSIG1/PIWIL4/CXADR/TLR4/TFF2 11

BP GO:0071549 cellular response to dexamethasone stimulus 11/2416 29/18862 0.00056142472268817 0.00428986070156602 0.00298896158030342 PCK2/ICAM1/PCK1/CFLAR/DDIT4/ASS1/SERPINF1/GJB2/SRD5A1/AQP1/ERRFI1 11

BP GO:0051341 regulation of oxidoreductase activity 27/2416 110/18862 0.000563514762883788 0.00430031752469575 0.00299624737458932 CDH3/EDN2/HIF1A/IL1B/SPHK2/ACVR2A/MT3/DDAH2/NOD2/MIR21/VDR/SLAMF8/EDN1/EDN3/AGT/CAV1/GNAI2/WASL/PDP1/SPR/IL1A/CYP27B1/RFK/TNF/ECSIT/IFNG/H19 27

BP GO:0007411 axon guidance 55/2416 277/18862 0.000569680727978426 0.00434181219789184 0.00302515879913163 CNTN4/VLDLR/SEMA5A/HOXA2/UNC5B/LAMA1/BSG/EFNA5/ROBO1/FYN/EFNA1/PLXNA2/CHN1/RAC2/EMB/SEMA4A/GAB1/MYCBP2/KLF7/ZSWIM5/SEMA6A/PLXND1/SEMA4D/RHOH/FLRT2/BMP7/NOTCH3/SEMA3E/CXCR4/IGSF9/PTPRM/NEXN/EPHA2/ALCAM/SHANK3/CSF1R/EGR2/PIK3CD/ROBO4/DOK2/PRKCQ/GRB7/RAP1GAP/EVL/SEMA6D/LAMC2/WNT5A/LAMB2/LGR6/NTN4/MYPN/NRCAM/LAMA5/CXCL12/RELN 55

BP GO:0003091 renal water homeostasis 13/2416 38/18862 0.000580469388976323 0.00436664351598449 0.0030424600265911 CYP4F2/CYP4F12/ADCY3/AQP3/HYAL2/WFS1/AKR1B1/PRKACB/ADCY6/PRKAR2B/ADCY4/AQP1/PRKAR1A 13

BP GO:0032733 positive regulation of interleukin-10 production 13/2416 38/18862 0.000580469388976323 0.00436664351598449 0.0030424600265911 NOD2/CD274/CD34/SASH3/TIGIT/STAT3/CD83/HGF/TLR2/IL23A/IRF4/IL6/TLR4 13

BP GO:0048246 macrophage chemotaxis 13/2416 38/18862 0.000580469388976323 0.00436664351598449 0.0030424600265911 EDN2/CCL2/SLAMF8/RARRES2/MMP28/CXCL17/MIF/CSF1R/C3AR1/C5AR1/CKLF/STAP1/MST1 13

BP GO:0001660 fever generation 6/2416 10/18862 0.000580998038284513 0.00436664351598449 0.0030424600265911 IL1B/PTGES/IL1A/PTGS2/TNFSF11/TNF 6

BP GO:0014820 tonic smooth muscle contraction 6/2416 10/18862 0.000580998038284513 0.00436664351598449 0.0030424600265911 EDN2/CD38/EDN1/EDNRA/SCNN1B/NMU 6

BP GO:0030656 regulation of vitamin metabolic process 6/2416 10/18862 0.000580998038284513 0.00436664351598449 0.0030424600265911 CLYBL/CYP27B1/TNF/IFNG/AKR1C3/SNAI2 6

BP GO:0031652 positive regulation of heat generation 6/2416 10/18862 0.000580998038284513 0.00436664351598449 0.0030424600265911 IL1B/APLN/PTGS2/TNFSF11/TNF/NMU 6

BP GO:0042368 vitamin D biosynthetic process 6/2416 10/18862 0.000580998038284513 0.00436664351598449 0.0030424600265911 CYP27A1/CYP3A4/CYP27B1/TNF/IFNG/SNAI2 6

BP GO:2000318 positive regulation of T-helper 17 type immune response 6/2416 10/18862 0.000580998038284513 0.00436664351598449 0.0030424600265911 NFKBIZ/MIR21/IL12RB1/MALT1/IL23A/PRKCQ 6

BP GO:2000659 regulation of interleukin-1-mediated signaling pathway 6/2416 10/18862 0.000580998038284513 0.00436664351598449 0.0030424600265911 ZBP1/MIR21/IL1RN/IL1R1/IL6/IL1R2 6

BP GO:2001225 regulation of chloride transport 6/2416 10/18862 0.000580998038284513 0.00436664351598449 0.0030424600265911 PRKG2/ABCB1/PTAFR/CA7/ANO9/GABRE 6

BP GO:0002295 T-helper cell lineage commitment 8/2416 17/18862 0.000593907195344984 0.00441357466864851 0.00307515931964295 SLAMF6/IL12RB1/STAT3/IL23A/IRF4/BATF/LY9/IL6 8

BP GO:0007379 segment specification 8/2416 17/18862 0.000593907195344984 0.00441357466864851 0.00307515931964295 HOXA2/HES5/COBL/MEOX1/MEOX2/MAFB/MLLT3/OSR1 8

BP GO:0010566 regulation of ketone biosynthetic process 8/2416 17/18862 0.000593907195344984 0.00441357466864851 0.00307515931964295 PPARGC1A/ADM/CLCN2/DGKQ/COQ3/EGR1/BMP5/AKR1C3 8

BP GO:0030889 negative regulation of B cell proliferation 8/2416 17/18862 0.000593907195344984 0.00441357466864851 0.00307515931964295 LYN/CTLA4/MNDA/BTK/FCGR2B/TYROBP/PKN1/CD300A 8

BP GO:0034134 toll-like receptor 2 signaling pathway 8/2416 17/18862 0.000593907195344984 0.00441357466864851 0.00307515931964295 LYN/NOD2/RIPK2/TLR2/PIK3AP1/TLR1/F2RL1/TNFAIP3 8

BP GO:0045342 MHC class II biosynthetic process 8/2416 17/18862 0.000593907195344984 0.00441357466864851 0.00307515931964295 XBP1/IL33/PF4/JAK2/CIITA/SPI1/IFNG/TLR4 8

BP GO:0046459 short-chain fatty acid metabolic process 8/2416 17/18862 0.000593907195344984 0.00441357466864851 0.00307515931964295 PHYH/ACADS/PCK2/PCK1/ACOT4/CRAT/ACSS2/TYRP1 8

BP GO:0061687 detoxification of inorganic compound 8/2416 17/18862 0.000593907195344984 0.00441357466864851 0.00307515931964295 MT3/MT1G/MT1F/MT1M/MT1E/MT1X/MT2A/SLC30A1 8

BP GO:0090713 immunological memory process 8/2416 17/18862 0.000593907195344984 0.00441357466864851 0.00307515931964295 HLA-DRB1/PCK1/HLA-DRA/IL12RB1/ST3GAL1/IL23A/CD160/BCL6 8

BP GO:0032147 activation of protein kinase activity 63/2416 328/18862 0.000597367300807738 0.00443375979179841 0.00308922330954516 PEA15/CHI3L1/MAP3K5/IL1B/GREM1/PLCE1/STRADB/MT3/EFNA5/NOD2/FPR1/TGFA/MIR21/SOCS1/PTPRC/INSR/MLKL/PROK2/CD74/CD86/OSBPL8/ADCY3/TNFRSF10B/MAPKAPK2/DGKQ/JAK2/AGT/PINK1/RIPK2/MAP3K8/MALT1/CXCR4/TNIK/GPRC5C/MAP4K4/HGF/NCKAP1L/AVPI1/CXCL17/CCL19/MAP4K1/LRRK2/IL23A/PKN1/FGF2/TNFSF11/PRKACB/CD300A/ADCY6/TOM1L1/TNF/C5AR1/WNT5A/GHR/NRG1/PRKAR2B/MUC20/ADCY4/ADAM9/TLR4/ADORA2B/PRKAR1A/MAP2K6 63

BP GO:0033002 muscle cell proliferation 46/2416 222/18862 0.000603803423214431 0.00447595572432588 0.0031186233367124 FGFR2/TGM2/MMP9/MAP3K5/PPARGC1A/STAT1/CX3CL1/PPARG/ADAMTS1/GJA1/MIR21/PTAFR/CFLAR/PDGFRB/NQO2/IGFBP5/PDCD4/EDN1/HES5/ZFPM2/JAK2/EFEMP2/SOD2/GNAI2/FGF9/AIF1/S1PR1/GATA6/NR4A3/APLN/HPGD/AKR1B1/FGF2/NDRG2/TNF/ITGA2/CALCRL/IL6/MIR214/TNFAIP3/MEIS1/KLF4/IFNG/APOD/PRKAR1A/WNT2 46

BP GO:1904035 regulation of epithelial cell apoptotic process 24/2416 94/18862 0.00060914498549567 0.00450994299820397 0.003142303978791 SEMA5A/ECSCR/RAMP2/PPARGC1A/CD40/ICAM1/CCL2/CFLAR/TEK/CDH5/PDCD4/JAK2/KDR/WFS1/CD160/ITGA4/TNF/CD248/ZFP36/IL6/SERPINE1/TNFAIP3/AKR1C3/H19 24

BP GO:0031664 regulation of lipopolysaccharide-mediated signaling pathway 10/2416 25/18862 0.000610698520827833 0.004515835216047 0.00314640938313413 CD55/CX3CL1/CD180/LY96/LTF/CD36/CARD8/LILRA2/TNFAIP3/LY86 10

BP GO:0006637 acyl-CoA metabolic process 26/2416 105/18862 0.000612551430818044 0.00451832491048953 0.00314814407839654 ACSF2/PDK2/HMGCS2/ACOT8/KYNU/ACAT1/ACOT11/TDO2/PDHA1/ACOT4/MLYCD/HMGCL/PPT1/ACSS2/ACOT9/SCD/SUCLG2/PDK4/ACSL4/PDP1/FAR2/HSD17B8/ACOT13/PDK1/ACSL1/ACSM3 26

BP GO:0035383 thioester metabolic process 26/2416 105/18862 0.000612551430818044 0.00451832491048953 0.00314814407839654 ACSF2/PDK2/HMGCS2/ACOT8/KYNU/ACAT1/ACOT11/TDO2/PDHA1/ACOT4/MLYCD/HMGCL/PPT1/ACSS2/ACOT9/SCD/SUCLG2/PDK4/ACSL4/PDP1/FAR2/HSD17B8/ACOT13/PDK1/ACSL1/ACSM3 26

BP GO:0048568 embryonic organ development 76/2416 412/18862 0.000613410905837311 0.00451907169195349 0.00314866439857939 FGFR2/PITX2/PLCD3/PRRX1/HOXA2/HOXA9/HIF1A/HOXA3/EOMES/ADM/HOXA5/HOXA4/SOCS3/CHST11/EFNA1/TWIST1/HOXA7/SLC9A3R1/FBN1/FLVCR1/PBX1/JUNB/EDN1/CEBPB/COBL/FZD5/CTHRC1/ZFPM2/RSPO3/MTHFD1L/OVOL2/RARRES2/TPRN/CEBPA/LEF1/ADA/BMP7/HOXA6/SATB2/KDR/TULP3/HOXB6/IHH/CDX2/TSHZ1/TIFAB/ALDH1A2/EPHA2/SLITRK6/EFEMP1/SOX17/BMP5/TEAD4/SPINT1/PKDCC/MMP14/MAFB/ENG/TNF/HOXB5/HOXB7/WNT5A/PKD2/LIF/USH1C/HOXB9/GRHL2/PHLDA2/SH2B3/PAX5/ALDH1A3/FOXF1/HYAL1/FRZB/WNT2/OSR1 76

BP GO:0071496 cellular response to external stimulus 59/2416 303/18862 0.000615319065349388 0.00452753287590414 0.00315455973073858 IFI16/VCAM1/PDK2/HSPA5/CASP1/LYN/MAP3K5/CBS/CNN2/IL1B/SIK1/ZC3H12A/CD40/FADS1/SLC39A5/MMP7/CDKN2B/PPARG/ICAM1/NR1H4/XBP1/PCK1/GJA1/IRF1/PTPRC/BAG3/TNC/TNFRSF10B/VDR/AQP3/TRIM24/SLC39A4/FOSL1/UCP2/PDK4/COL1A1/GOT1/LRRK2/LPL/CYP27B1/PMAIP1/NR4A2/CPEB4/SRD5A1/TLR8/ENG/ITGA4/FOS/ITGA2/KCNJ2/DSC2/SIPA1/BNIP3/AQP1/AKR1C3/TLR4/SFRP2/SNAI2/CASP5 59

BP GO:0002433 immune response-regulating cell surface receptor signaling pathway involved in phagocytosis 32/2416 139/18862 0.000621416487646745 0.00456113579602783 0.00317797257423698 LYN/IGKC/FGR/IGLV2-23/IGLV3-19/FYN/PTPRC/IGLV1-44/VAV3/ELMO1/VAV1/APPL2/IGLV6-57/WIPF1/IGHG1/ARPC1B/FCGR2B/NCKAP1L/IGKV3-20/IGKV4-1/WASL/IGHV1-69/WIPF2/WAS/HCK/PLCG2/FCGR1A/CD3G/CD247/IGKV1-5/FCGR2A/HSP90AB1 32

BP GO:0038096 Fc-gamma receptor signaling pathway involved in phagocytosis 32/2416 139/18862 0.000621416487646745 0.00456113579602783 0.00317797257423698 LYN/IGKC/FGR/IGLV2-23/IGLV3-19/FYN/PTPRC/IGLV1-44/VAV3/ELMO1/VAV1/APPL2/IGLV6-57/WIPF1/IGHG1/ARPC1B/FCGR2B/NCKAP1L/IGKV3-20/IGKV4-1/WASL/IGHV1-69/WIPF2/WAS/HCK/PLCG2/FCGR1A/CD3G/CD247/IGKV1-5/FCGR2A/HSP90AB1 32

BP GO:0097485 neuron projection guidance 55/2416 278/18862 0.000623438021808208 0.00457034515372315 0.00318438919665097 CNTN4/VLDLR/SEMA5A/HOXA2/UNC5B/LAMA1/BSG/EFNA5/ROBO1/FYN/EFNA1/PLXNA2/CHN1/RAC2/EMB/SEMA4A/GAB1/MYCBP2/KLF7/ZSWIM5/SEMA6A/PLXND1/SEMA4D/RHOH/FLRT2/BMP7/NOTCH3/SEMA3E/CXCR4/IGSF9/PTPRM/NEXN/EPHA2/ALCAM/SHANK3/CSF1R/EGR2/PIK3CD/ROBO4/DOK2/PRKCQ/GRB7/RAP1GAP/EVL/SEMA6D/LAMC2/WNT5A/LAMB2/LGR6/NTN4/MYPN/NRCAM/LAMA5/CXCL12/RELN 55

BP GO:0006833 water transport 9/2416 21/18862 0.000629627087070472 0.00460438949563192 0.00320810960089508 AQP7/AQP8/PDZD3/AQP11/AQP9/AQP3/HYAL2/SLC5A1/AQP1 9

BP GO:0032516 positive regulation of phosphoprotein phosphatase activity 9/2416 21/18862 0.000629627087070472 0.00460438949563192 0.00320810960089508 MAGI2/PTPRC/PDGFRB/JAK2/FCRL3/CD300A/PPP1R14D/CD33/HSP90AB1 9

BP GO:0030808 regulation of nucleotide biosynthetic process 14/2416 43/18862 0.000638954999016736 0.00466116498670715 0.00324766793934294 PDK2/SPHK2/PDZD3/PPARGC1A/GUCA2B/HPCA/NOS2/PINK1/VCP/GUCA2A/PDK4/PDP1/PDK1/H19 14

BP GO:0050654 chondroitin sulfate proteoglycan metabolic process 14/2416 43/18862 0.000638954999016736 0.00466116498670715 0.00324766793934294 CHST3/BGN/CHST11/CSGALNACT2/UGDH/CHST15/CHSY1/SPOCK2/EGFLAM/DCN/CSGALNACT1/VCAN/CHSY3/HYAL1 14

BP GO:0031100 animal organ regeneration 20/2416 73/18862 0.000645806094148396 0.00469963897573192 0.00327447470138863 NNMT/CPT1A/LPIN1/ADM/PPARG/ANGPT2/CLDN1/REG1A/CEBPB/LCP1/UCP2/SULF2/IHH/HGF/ANXA3/NR4A3/C5AR1/PTPN3/IL6/CXCL12 20

BP GO:1903556 negative regulation of tumor necrosis factor superfamily cytokine production 20/2416 73/18862 0.000645806094148396 0.00469963897573192 0.00327447470138863 IRAK3/ZC3H12A/CX3CL1/NOD2/NR1H4/LILRB1/TWIST1/CD274/SIRPA/SYT11/CD34/SLAMF1/CLEC4A/IL27RA/LTF/NLRC3/PTPN6/TNFAIP3/TLR4/CD33 20

BP GO:0033273 response to vitamin 23/2416 89/18862 0.000653206016551691 0.00474769251054644 0.00330795601450118 KYNU/CD40/PPARG/OTC/SPARC/TNC/ALAD/CXCL10/VDR/AQP3/TRIM24/ADA/STC1/BMP7/COL1A1/SOD2/ALDH1A2/CYP27B1/SPP1/ITGA2/CAT/BCHE/SNAI2 23

BP GO:1900015 regulation of cytokine production involved in inflammatory response 19/2416 68/18862 0.000670451644589673 0.00486710329080932 0.00339115550728413 ZC3H12A/NOD2/MIR21/GBP5/SIRPA/PDCD4/GPSM3/APPL2/NOS2/STAT3/LILRB4/NLRP7/NLRC3/TNF/IL6/TLR4/APOD/IL1R2/H19 19

BP GO:0002762 negative regulation of myeloid leukocyte differentiation 15/2416 48/18862 0.000675817176622761 0.00488819219984424 0.00340584921024118 LYN/PIAS3/LILRB1/UBASH3B/HOXA7/LILRB3/FBN1/GPR137B/NME1/LTF/LILRB4/MAFB/FBXW7/INHBA/TLR4 15

BP GO:0045058 T cell selection 15/2416 48/18862 0.000675817176622761 0.00488819219984424 0.00340584921024118 PTPRC/SLAMF6/CD74/IL12RB1/STAT3/CCR7/CD3D/IL23A/IRF4/BATF/CD3G/CD1D/CD3E/LY9/IL6 15

BP GO:0061028 establishment of endothelial barrier 15/2416 48/18862 0.000675817176622761 0.00488819219984424 0.00340584921024118 MSN/PECAM1/IL1B/ICAM1/CLDN1/CDH5/PPP1R16B/ROBO4/S1PR3/ENG/TNF/MYADM/TJP3/F2RL1/MARVELD2 15

BP GO:0002691 regulation of cellular extravasation 12/2416 34/18862 0.000681347325347276 0.00491625915141618 0.00342540486618453 THY1/SELP/ICAM1/PTAFR/CCL21/IL27RA/IL1R1/PLVAP/ITGA4/ST3GAL4/SELE/CXCL12 12

BP GO:0070232 regulation of T cell apoptotic process 12/2416 34/18862 0.000681347325347276 0.00491625915141618 0.00342540486618453 HIF1A/IDO1/EFNA1/CD274/IL7R/GIMAP8/ST3GAL1/ADA/DOCK8/CD27/PRKCQ/WNT5A 12

BP GO:0050853 B cell receptor signaling pathway 31/2416 134/18862 0.000686636339505811 0.00494245481093555 0.00344365669889451 LYN/IGKC/IGHM/PTPRC/CTLA4/CD79A/VAV3/TRBC1/MNDA/CD38/RFTN1/BTK/ITK/KLHL6/IGHG1/LCK/FCGR2B/NCKAP1L/FCRL3/IGHV1-69/PLCG2/PIK3CD/CD19/MS4A1/PRKCH/CD300A/PTPN6/CD22/IGHD/PAX5/STAP1 31

BP GO:0097553 calcium ion transmembrane import into cytosol 31/2416 134/18862 0.000686636339505811 0.00494245481093555 0.00344365669889451 CXCL9/THY1/LYN/SRI/CX3CL1/TMEM38B/FYN/UBASH3B/PTPRC/APLNR/CXCL10/CXCL11/RAMP3/CORO1A/TRPV1/CLIC2/ITPR1/LCK/CCL21/CCL19/CCR7/TMEM38A/PLCG2/CD19/FGF2/MCOLN2/FAM155A/PTPN6/PKD2/CCR5/DHRS7C 31

BP GO:0046173 polyol biosynthetic process 18/2416 63/18862 0.000688413744116171 0.00494927130872422 0.00344840609553463 ITPKA/PCK2/IMPA2/SPHK2/IP6K2/PCK1/PTAFR/CYP27A1/P2RY1/PLEK/CYP3A4/GOT1/SPR/PLCG2/CYP27B1/AKR1B1/FGF2/SPHK1 18

BP GO:0071320 cellular response to cAMP 16/2416 53/18862 0.000694129931955338 0.00498435469211303 0.00347285045220521 AQP8/HSPA5/PCK1/PTAFR/AQP9/IGFBP5/ASS1/EEF2K/SLC26A3/STC1/FDX1/SRD5A1/PKD2/AQP1/AHR/CPS1 16

BP GO:0120193 tight junction organization 22/2416 84/18862 0.000697144408923328 0.00498878810349641 0.0034759394327611 CLDN2/PECAM1/RAMP2/MPP7/CLDN15/ESAM/GJA1/CLDN1/MARVELD3/CDH5/FZD5/CLDN8/RAB13/EPHA2/CLDN23/OCLN/PRKCH/TNF/GRHL2/CLDN7/MARVELD2/SNAI2 22

BP GO:0035306 positive regulation of dephosphorylation 17/2416 58/18862 0.000697258471512166 0.00498878810349641 0.0034759394327611 MAGI2/LILRB2/CHP2/PTPRC/PDGFRB/CDH5/PPP1R16B/JAK2/PINK1/PLEK/FCRL3/CD300A/ITGA2/PPP1R14D/IFNG/CD33/HSP90AB1 17

BP GO:2000351 regulation of endothelial cell apoptotic process 17/2416 58/18862 0.000697258471512166 0.00498878810349641 0.0034759394327611 SEMA5A/ECSCR/RAMP2/CD40/ICAM1/CCL2/TEK/CDH5/PDCD4/KDR/CD160/ITGA4/TNF/CD248/SERPINE1/TNFAIP3/AKR1C3 17

BP GO:0007498 mesoderm development 29/2416 123/18862 0.000728019700415954 0.00520263478954327 0.00362493716791738 RPS6KA6/FGFR2/TWSG1/EOMES/EPB41L5/ACVR2A/EYA2/GJA1/OVOL1/ZFPM2/TIE1/JAK2/LEF1/BTK/BMP7/IKZF1/EPHA2/MEST/HCK/ITGA2/WNT5A/INHBA/KLF4/FOXF1/PRKAR1A/SECTM1/SFRP2/DKK1/OSR1 29

BP GO:0030104 water homeostasis 21/2416 79/18862 0.000739885704756611 0.00527478325400646 0.00367520662964597 GRHL1/ABCA12/CYP4F2/SCTR/AQP11/AQP9/CYP4F12/CLDN1/ADCY3/AQP3/HYAL2/NEDD4L/WFS1/AKR1B1/PRKACB/ADCY6/PRKAR2B/ADCY4/AQP1/PRKAR1A/SCNN1B 21

BP GO:1990830 cellular response to leukemia inhibitory factor 21/2416 79/18862 0.000739885704756611 0.00527478325400646 0.00367520662964597 SNX10/PADI2/ICAM1/VEGFC/SOCS3/SRM/PMM1/MRAS/SSTR1/NR5A2/SPOCK2/SOX17/TNFSF11/ILDR1/CTH/RNF138/MSC/GFPT2/SMAD7/KLF4/DTX1 21

BP GO:0032660 regulation of interleukin-17 production 13/2416 39/18862 0.000769664972448029 0.00547398954151581 0.00381400366324265 SLC7A5/NOD2/SLAMF6/NCKAP1L/IL27RA/IL23A/PRKCQ/SPHK1/LY9/IL6/IFNG/TLR4/OSM 13

BP GO:1905521 regulation of macrophage migration 13/2416 39/18862 0.000769664972448029 0.00547398954151581 0.00381400366324265 CX3CL1/SLAMF8/RARRES2/MMP28/CXCL17/MIF/CSF1R/MMP14/C3AR1/P2RX4/C5AR1/STAP1/MST1 13

BP GO:0051604 protein maturation 57/2416 293/18862 0.000770922068012643 0.00547639514345096 0.00381567976702826 DUOXA2/IFI16/BACE2/CASP1/PRDX4/CASP4/GALNT2/CTSH/CPXM1/C1R/CST7/DNAJB11/CTSE/PLAU/CISD3/F3/SPCS3/KLK3/MME/APOH/AFG3L2/CALR/APH1B/ADAMTS3/RIPK2/CHAC1/SEC11C/IHH/CPZ/BAG2/PCSK1/MMEL1/LRRK2/WFS1/ADAM19/SRGN/NLRP7/TSPAN5/CARD8/PRKACB/LDLRAD3/MMP14/SERPINH1/KLK1/TMEM98/GLG1/KLKB1/KLK6/CPM/SERPINE1/CPA3/GAS1/PRSS3/IMMP1L/PCSK1N/IL1R2/TMPRSS4 57

BP GO:0048002 antigen processing and presentation of peptide antigen 41/2416 194/18862 0.00077252794250746 0.00548126968731484 0.00381907610675681 OSBPL1A/SEC13/HLA-DMA/SEC24D/TAP2/PSMB9/HLA-DRB1/TAP1/IFI30/NCF2/CTSE/SEC24A/MR1/CD74/HLA-DRA/KIFAP3/FCGR1B/HLA-DMB/CALR/HLA-DOB/NCF4/FCER1G/RILP/PSMB8/FCGR2B/CLEC4A/CD36/HLA-DPA1/FCGR1A/SH3GL2/ITGAV/HLA-DPB1/LAG3/CD207/SEC24C/AP1M2/AZGP1/HLA-DQB1/PSMA8/ERAP2/HLA-DQA1 41

BP GO:0010950 positive regulation of endopeptidase activity 39/2416 182/18862 0.000775170387586165 0.00549347860881515 0.00382758267604659 S100A8/IFI16/CASP1/LYN/BCL2L10/MAP3K5/CTSH/S100A9/PPARG/ROBO1/FYN/EFNA1/MIR21/AIM2/LAPTM5/FAM162A/CFLAR/F3/ACVR1C/TNFRSF10B/JAK2/CR1/APH1B/RIPK2/STAT3/VCP/MALT1/LCK/CYCS/CARD8/NLRP1/PMAIP1/TNF/SEMG1/SLC1A1/SERPINB3/GRAMD4/XDH/SFRP2 39

BP GO:0007015 actin filament organization 79/2416 435/18862 0.000781195296227214 0.00552960090916175 0.00385275089838275 SEMA5A/MYO1D/CCL11/ASAP3/HCLS1/FERMT2/TPM4/CX3CL1/ESAM/HSP90B1/ICAM1/ESPN/GDPD2/IQGAP2/PLS3/MIR21/TACSTD2/RAC2/VIL1/FSCN1/ELMO1/COTL1/SORBS3/SCIN/ZYX/SHROOM2/GAS2L3/COBL/CORO1A/GMFG/JAK2/DPYSL3/LCP1/PLEK/SHROOM4/WIPF1/RHOH/SPIRE2/PSTPIP1/GPR65/ARHGAP25/ARPC1B/BAIAP2L2/CCL21/MAD2L2/NCKAP1L/CCR7/AIF1/RGS4/DBN1/S1PR1/KANK4/WASL/PREX1/FHDC1/SHANK3/WAS/ARHGEF10L/SHROOM3/HCK/CALD1/WASF1/MYO1F/SWAP70/EVL/MYADM/FLNA/ERMN/MYO1A/USH1C/F2RL1/MIR214/RND1/SH3BP1/PFN2/ELMO3/CXCL12/CSF3/CDC42EP5 79

BP GO:0045577 regulation of B cell differentiation 11/2416 30/18862 0.000784711638639418 0.00553477084768158 0.00385635305441608 XBP1/SLAMF8/CR1/BTK/HMGB3/CD27/NCKAP1L/FCRL3/MMP14/PTPN6/INHBA 11

BP GO:0050650 chondroitin sulfate proteoglycan biosynthetic process 11/2416 30/18862 0.000784711638639418 0.00553477084768158 0.00385635305441608 CHST3/BGN/CHST11/CSGALNACT2/UGDH/CHST15/CHSY1/DCN/CSGALNACT1/VCAN/CHSY3 11

BP GO:0050858 negative regulation of antigen receptor-mediated signaling pathway 11/2416 30/18862 0.000784711638639418 0.00553477084768158 0.00385635305441608 THY1/GBP1/LAPTM5/SH2D1A/FCGR2B/FCRL3/LILRB4/CD160/CD300A/PTPN6/CD22 11

BP GO:0043550 regulation of lipid kinase activity 19/2416 69/18862 0.000815738690056924 0.00574681157534192 0.00400409248758811 LYN/FGR/PIK3R3/FGFR3/IRS1/NOD2/SOCS3/SOCS1/VAV3/PDGFRB/TEK/PIK3R5/CCL21/CCL19/CCR7/CD19/FGF2/KLF4/FPR2 19

BP GO:0045124 regulation of bone resorption 14/2416 44/18862 0.000827939854707261 0.00582371825028212 0.00405767723372712 UBASH3B/CD38/DEF8/GPR137B/PDK4/S1PR1/CSF1R/CA2/TNFSF11/SPP1/IL6/TNFAIP3/TNFRSF11B/TMEM119 14

BP GO:0019915 lipid storage 22/2416 85/18862 0.000828609576550208 0.00582371825028212 0.00405767723372712 ENPP1/ABHD5/CPT1A/IL1B/C3/ZC3H12A/PPARG/ACVR1C/VSTM2A/OSBPL8/CAV1/MEST/CD36/LPL/ITGAV/TNF/FBXW7/NFKBIA/IL6/NRIP1/CDS1/STARD4 22

BP GO:0001837 epithelial to mesenchymal transition 34/2416 153/18862 0.000838543899285987 0.00585440839096389 0.0040790605973777 GCNT2/FGFR2/PDPN/PBLD/HIF1A/IL1B/GREM1/OLFM1/EOMES/FERMT2/EPB41L5/EFNA1/MIR21/TWIST1/PDCD4/S100A4/OVOL2/LEF1/BMP7/COL1A1/WWTR1/HGF/MAD2L2/BMP5/SMAD7/ENG/FLNA/WNT5A/IL6/SERPINB3/BAMBI/SFRP2/WNT2/SNAI2 34

BP GO:0050922 negative regulation of chemotaxis 18/2416 64/18862 0.000844744741799581 0.00585440839096389 0.0040790605973777 SEMA5A/GREM1/PADI2/CCL2/ROBO1/ANGPT2/SEMA4A/SLAMF8/CXCL13/SEMA6A/SEMA4D/MMP28/SEMA3E/AIF1/MIF/SEMA6D/WNT5A/STAP1 18

BP GO:0071300 cellular response to retinoic acid 18/2416 64/18862 0.000844744741799581 0.00585440839096389 0.0040790605973777 FGFR2/HOXA2/LYN/LTK/PPARG/PCK1/TNC/GJB3/SERPINF1/COL1A1/PTK6/ALDH1A2/WNT5A/FZD10/AQP1/KLF4/WNT2/OSR1 18

BP GO:0072577 endothelial cell apoptotic process 18/2416 64/18862 0.000844744741799581 0.00585440839096389 0.0040790605973777 SEMA5A/ECSCR/MAP3K5/RAMP2/CD40/ICAM1/CCL2/TEK/CDH5/PDCD4/KDR/CD160/ITGA4/TNF/CD248/SERPINE1/TNFAIP3/AKR1C3 18

BP GO:0002467 germinal center formation 7/2416 14/18862 0.000844763626884052 0.00585440839096389 0.0040790605973777 TNFSF13B/CXCL13/ADA/KLHL6/PKN1/BCL6/TNFAIP3 7

BP GO:0002517 T cell tolerance induction 7/2416 14/18862 0.000844763626884052 0.00585440839096389 0.0040790605973777 IDO1/LILRB2/ICOS/IL2RA/LILRB4/CD3E/PHLPP1 7

BP GO:0002638 negative regulation of immunoglobulin production 7/2416 14/18862 0.000844763626884052 0.00585440839096389 0.0040790605973777 IL33/IL13RA2/CR1/FCGR2B/FCRL3/BCL6/CD22 7

BP GO:0010935 regulation of macrophage cytokine production 7/2416 14/18862 0.000844763626884052 0.00585440839096389 0.0040790605973777 IRAK3/LILRB1/LAPTM5/CD74/CD36/WNT5A/TLR4 7

BP GO:0032310 prostaglandin secretion 7/2416 14/18862 0.000844763626884052 0.00585440839096389 0.0040790605973777 IL1B/EDN1/NOS2/PTGES/TNFSF11/P2RX4/MAP2K6 7

BP GO:0043374 CD8-positive, alpha-beta T cell differentiation 7/2416 14/18862 0.000844763626884052 0.00585440839096389 0.0040790605973777 EOMES/IRF1/SOCS1/TNFSF8/NCKAP1L/RUNX3/LILRB4 7

BP GO:0070141 response to UV-A 7/2416 14/18862 0.000844763626884052 0.00585440839096389 0.0040790605973777 TIMP1/MMP3/OPN3/MMP1/MMP9/PPID/MME 7

BP GO:0090715 immunological memory formation process 7/2416 14/18862 0.000844763626884052 0.00585440839096389 0.0040790605973777 HLA-DRB1/PCK1/HLA-DRA/IL12RB1/ST3GAL1/IL23A/BCL6 7

BP GO:0034614 cellular response to reactive oxygen species 35/2416 159/18862 0.000849757268075942 0.00588217574649549 0.00409840750970058 MMP3/PDK2/MMP9/MAP3K5/PDE8A/ANXA1/MT3/MIR21/SIRPA/CFLAR/PINK1/BTK/BMP7/ETS1/SOD2/HGF/LRRK2/NR4A3/CD36/FBLN5/FABP1/SPHK1/FOS/PKD2/IL6/IL18RAP/TNFAIP3/NET1/BNIP3/AQP1/KLF4/ENDOG/AKR1C3/SOD3/H19 35

BP GO:0072348 sulfur compound transport 15/2416 49/18862 0.000860065554137219 0.00594662494507868 0.00414331250588757 SLC19A3/SLC36A1/ABCG2/SLC3A1/SLC26A2/LRRC8C/GJA1/SLC9A3R1/SLC7A11/SLC6A6/SLC26A3/ABCC1/SLC1A4/SLC25A10/SLC1A1 15

BP GO:0002478 antigen processing and presentation of exogenous peptide antigen 38/2416 177/18862 0.000865602906833526 0.00597797604255831 0.00416515639136215 OSBPL1A/SEC13/HLA-DMA/SEC24D/TAP2/PSMB9/HLA-DRB1/TAP1/IFI30/NCF2/CTSE/SEC24A/CD74/HLA-DRA/KIFAP3/FCGR1B/HLA-DMB/CALR/HLA-DOB/NCF4/FCER1G/RILP/PSMB8/FCGR2B/CLEC4A/CD36/HLA-DPA1/FCGR1A/SH3GL2/ITGAV/HLA-DPB1/LAG3/CD207/SEC24C/AP1M2/HLA-DQB1/PSMA8/HLA-DQA1 38

BP GO:0071377 cellular response to glucagon stimulus 10/2416 26/18862 0.000879314924229214 0.00606564461621078 0.00422623949328003 PCK1/ADCY3/ASS1/PRKACB/GJB2/ADCY6/PRKAR2B/ADCY4/PRKAR1A/CPS1 10

BP GO:1990823 response to leukemia inhibitory factor 21/2416 80/18862 0.000884041036005495 0.00608416232631957 0.00423914171270412 SNX10/PADI2/ICAM1/VEGFC/SOCS3/SRM/PMM1/MRAS/SSTR1/NR5A2/SPOCK2/SOX17/TNFSF11/ILDR1/CTH/RNF138/MSC/GFPT2/SMAD7/KLF4/DTX1 21

BP GO:2000117 negative regulation of cysteine-type endopeptidase activity 21/2416 80/18862 0.000884041036005495 0.00608416232631957 0.00423914171270412 IFI16/MMP9/LAMP3/SERPINB9/MT3/TNFAIP8/CST7/CD44/VIL1/PLAUR/CD27/HERPUD1/HGF/LTF/CARD8/FABP1/TNF/SH3RF1/AQP1/KLF4/SFRP2 21

BP GO:0045598 regulation of fat cell differentiation 31/2416 136/18862 0.00089307353140579 0.0061392367326165 0.00427751481988204 ENPP1/TRIB2/FERMT2/ZADH2/ZC3H12A/PPARG/XBP1/MIR21/VSTM2A/CEBPB/ZFPM2/RARRES2/CEBPA/CCDC3/BMP7/ZBTB7C/WWTR1/DUSP10/PTGS2/LPL/NAPEPLD/TNF/TRPM4/WNT5A/ZFP36/IL6/CDS1/ZNF385A/FRZB/SFRP2/TPH1 31

BP GO:0034367 protein-containing complex remodeling 12/2416 35/18862 0.000917196544993009 0.00629055397946874 0.00438294515171391 LIPC/PLA2G2A/NR1H4/AGT/APOM/PLA2G7/LIPG/LPL/CETP/APOC1/APOC2/ABCA5 12

BP GO:0072525 pyridine-containing compound biosynthetic process 12/2416 35/18862 0.000917196544993009 0.00629055397946874 0.00438294515171391 NNMT/PARP9/KYNU/IDO1/NMNAT3/PSAT1/KMO/NAMPT/NMNAT1/PTGS2/NUDT12/IDO2 12

BP GO:1903900 regulation of viral life cycle 33/2416 148/18862 0.000932488831506939 0.00638808440894409 0.00445089950428902 APOBEC3B/IFI16/IFITM3/IFITM2/ISG20/LAMP3/IFITM1/HLA-DRB1/TRIM22/OAS2/CD74/PPID/NR5A2/TMEM39A/CIITA/VPS37B/FCN1/APOBEC3G/CHMP4B/P4HB/SLPI/LGALS1/LTF/MAVS/FCN3/BST2/LY6E/ISG15/TNF/CAV2/OASL/TMPRSS4/CHMP4C 33

BP GO:0043457 regulation of cellular respiration 9/2416 22/18862 0.000945164206853067 0.00645280173705066 0.00449599131979245 OPN3/HIF1A/PPARGC1A/SLC25A23/NOS2/VCP/SHMT2/BNIP3/IFNG 9

BP GO:2000316 regulation of T-helper 17 type immune response 9/2416 22/18862 0.000945164206853067 0.00645280173705066 0.00449599131979245 ZC3H12A/NFKBIZ/MIR21/IL12RB1/MALT1/IL27RA/IL23A/PRKCQ/SMAD7 9

BP GO:0000187 activation of MAPK activity 34/2416 154/18862 0.000946194958553093 0.00645280173705066 0.00449599131979245 PEA15/MAP3K5/IL1B/PLCE1/NOD2/FPR1/TGFA/PTPRC/INSR/MLKL/PROK2/CD74/MAPKAPK2/AGT/RIPK2/CXCR4/HGF/AVPI1/CXCL17/CCL19/MAP4K1/LRRK2/PKN1/FGF2/TNFSF11/TNF/C5AR1/WNT5A/GHR/NRG1/MUC20/TLR4/ADORA2B/MAP2K6 34

BP GO:0002643 regulation of tolerance induction 8/2416 18/18862 0.000949514618019031 0.00645280173705066 0.00449599131979245 IRAK3/IDO1/LILRB2/CD274/IL2RA/LILRB4/CD3E/PHLPP1 8

BP GO:0032695 negative regulation of interleukin-12 production 8/2416 18/18862 0.000949514618019031 0.00645280173705066 0.00449599131979245 IRAK3/NOD2/LILRB1/MIR21/TIGIT/SLAMF1/CCR7/TLR8 8

BP GO:0045063 T-helper 1 cell differentiation 8/2416 18/18862 0.000949514618019031 0.00645280173705066 0.00449599131979245 ANXA1/SEMA4A/IL18R1/CD80/RIPK2/LEF1/CCL19/TMEM98 8

BP GO:0046851 negative regulation of bone remodeling 8/2416 18/18862 0.000949514618019031 0.00645280173705066 0.00449599131979245 GREM1/UBASH3B/CD38/GPR137B/IL6/TNFAIP3/TNFRSF11B/TMEM119 8

BP GO:0034446 substrate adhesion-dependent cell spreading 26/2416 108/18862 0.000963006452824005 0.00653703696905589 0.00455468224000803 PDPN/OLFM4/LAMC1/FERMT2/GBP1/EFNA5/EFNA1/TACSTD2/TEK/CALR/PARVG/P4HB/PARVB/PREX1/LAMB1/RCC2/ITGAV/ITGA4/MYADM/FLNA/FERMT3/LAMB2/FN1/NTNG2/NTN4/LAMA5 26

BP GO:0042063 gliogenesis 55/2416 283/18862 0.000966128471408834 0.0065507687026128 0.00456424982900168 S100A8/BACE2/LRP8/LYN/IL1B/ANXA1/NDRG1/GPR183/MT3/S100A9/CX3CL1/PPARG/CCL2/IL33/HDAC11/TNFRSF1B/ERBB3/HES5/P2RY1/VIM/LEF1/STAT3/CLU/CLCF1/CXCR4/DUSP10/LGI4/TLR2/LAMB1/CSF1R/EGR2/KCNJ10/SPINT1/LTA/MMP14/PRKCH/ASPA/TMEM98/P2RX4/TNF/C5AR1/LAMB2/IFNGR1/LIF/IL6/BNIP3/IFNG/MXRA8/ADCYAP1/TLR4/TSPAN2/STAP1/DTX1/FPR2/RELN 55

BP GO:0032677 regulation of interleukin-8 production 24/2416 97/18862 0.000985928926566644 0.00667742772992864 0.00465249953983901 IL1B/ANXA1/NOD2/PTPRC/AFAP1L2/F3/CD74/CD2/STAT3/FCN1/HYAL2/TLR2/TLR1/MAVS/TLR8/CD14/TNF/WNT5A/IL6/SERPINE1/F2RL1/KLF4/TLR4/CD33 24

BP GO:0051348 negative regulation of transferase activity 57/2416 296/18862 0.000993141366723889 0.00671864080099249 0.00468121475802108 IRAK3/DUSP4/THY1/LYN/IL1B/RGS2/TRIB2/PKIB/SH3BP5/CDKN2B/PPARG/LAX1/SOCS3/SOCS1/UBASH3B/PTPRC/CAMK2N1/DNAJA1/HEG1/PDCD4/PKIA/ITPRIP/GMFG/AGT/CEBPA/DUSP14/DUSP21/CAV1/RHOH/HYAL2/BMP7/CBLC/BAG2/RASIP1/WWTR1/MAD2L2/DUSP10/PTK6/RGS4/LILRB4/DUSP22/HHEX/PKN1/CD300A/SMAD7/PTPN6/PPP1R1B/PRKAR2B/ZFP36/TNFAIP3/IFNG/SERPINB3/FABP4/SH2B3/PRKAR1A/SFRP2/ERRFI1 57

BP GO:0006644 phospholipid metabolic process 76/2416 419/18862 0.0010072066191171 0.00679641875666821 0.00473540656924339 LPCAT1/LIPC/ETNK1/HMGCS2/PLA2G2A/NAAA/INPP5J/ABHD5/ITPKA/AGPAT4/PLCD1/MTMR11/LPIN1/PIK3R3/PLA2G12B/PLA1A/IMPA2/SPHK2/PNLIPRP2/PLD1/FADS1/IP6K2/TMEM38B/PRDX6/NR1H4/LPGAT1/SOCS3/DOLPP1/SOCS1/GPCPD1/ABCA8/FABP3/CWH43/BPNT1/PDGFRB/OSBPL8/ALPI/PGAP3/SLC44A1/CHPT1/DGKQ/SGMS1/SRD5A3/PLEK/CHKA/GPD1L/PLA2G12A/OCRL/PIGZ/PLA2G7/PLA2G2D/PIK3R5/LIPG/HADHA/GATA6/ENPP2/ABHD3/CSF1R/GDPD3/PLCG2/LPL/MBOAT1/PIK3CD/CETP/TTC7B/FGF2/PIP5K1B/NAPEPLD/CRLS1/APOC1/SLC44A3/SERINC2/MTM1/APOC2/STARD10/CDS1 76

BP GO:0050856 regulation of T cell receptor signaling pathway 13/2416 40/18862 0.00100805942632461 0.00679641875666821 0.00473540656924339 THY1/GBP1/LAPTM5/SH2D1A/ADA/MALT1/LCK/CCR7/LILRB4/CD160/CD300A/PTPN6/TRAT1 13

BP GO:0071634 regulation of transforming growth factor beta production 13/2416 40/18862 0.00100805942632461 0.00679641875666821 0.00473540656924339 CDH3/LUM/HIF1A/LILRB1/CD34/LRRC32/GATA6/TYROBP/PTGS2/SERPINB7/ITGAV/FN1/HSP90AB1 13

BP GO:0009952 anterior/posterior pattern specification 42/2416 203/18862 0.00104892892782501 0.00706397334444865 0.00492182529916106 HOXA2/HOXA9/HOXA3/EPB41L5/ACVR2A/HOXA5/HOXA4/PLXNA2/BHLHE40/HOXA7/BASP1/BTG2/PBX1/HES5/COBL/FZD5/MEOX1/LEF1/HOXA6/TULP3/HOXA10/HOXB6/MEOX2/CDX2/TSHZ1/TIFAB/ALDH1A2/SOX17/HES2/HHEX/NRARP/HOXB5/HOXB7/WNT5A/HOXD8/HOXB9/MLLT3/FOXF1/CDX1/SFRP2/WNT2/OSR1 42

BP GO:0043903 regulation of biological process involved in symbiotic interaction 41/2416 197/18862 0.00105970557609984 0.00712741972316938 0.0049660315803432 APOBEC3B/IFI16/IFITM3/IFITM2/ISG20/LAMP3/IFITM1/HLA-DRB1/TRIM22/OAS2/STAT1/CXCL6/CD74/PPID/NR5A2/TMEM39A/CIITA/VPS37B/CAV1/FCN1/APOBEC3G/CHMP4B/CXCR4/P4HB/SLPI/LGALS1/LTF/MAVS/FCN3/BST2/LY6E/ITGAV/ISG15/TNF/ZFP36/F2RL1/CAV2/KRT6A/OASL/TMPRSS4/CHMP4C 41

BP GO:0017144 drug metabolic process 14/2416 45/18862 0.00106193770372054 0.00712741972316938 0.0049660315803432 CYP2B6/FMO4/CYP4F2/ABCB11/CYP4F12/NR1I2/FMO5/CYP3A4/CYP2J2/CYP2S1/BCHE/CYP2C9/FMO1/AOX1 14

BP GO:0085029 extracellular matrix assembly 14/2416 45/18862 0.00106193770372054 0.00712741972316938 0.0049660315803432 RAMP2/COL1A2/TIE1/AGT/EFEMP2/PXDN/IHH/MFAP4/LAMB1/FBLN5/FKBP10/LAMB2/NTNG2/NTN4 14

BP GO:0045638 negative regulation of myeloid cell differentiation 23/2416 92/18862 0.0010697493222553 0.00717177273412999 0.00499693455248018 LYN/HOXA9/PIAS3/HOXA5/LILRB1/UBASH3B/HOXA7/LILRB3/FBN1/PF4/GPR137B/HMGB3/NME1/GPR171/LTF/LILRB4/MAFB/FBXW7/NFKBIA/INHBA/ZFP36/MEIS1/TLR4 23

BP GO:0002230 positive regulation of defense response to virus by host 11/2416 31/18862 0.00107686867201329 0.00718716381321299 0.00500765829090874 PARP9/TRAF3IP2/ZC3H12A/STAT1/LILRB1/AIM2/IL12RB1/APOBEC3G/IL23A/MAVS/ZDHHC11 11

BP GO:0003382 epithelial cell morphogenesis 11/2416 31/18862 0.00107686867201329 0.00718716381321299 0.00500765829090874 RILPL2/TNMD/EPB41L5/COL15A1/HEG1/STC1/IHH/COL18A1/CLIC4/VSIG1/GRHL2 11

BP GO:0070229 negative regulation of lymphocyte apoptotic process 11/2416 31/18862 0.00107686867201329 0.00718716381321299 0.00500765829090874 HIF1A/IDO1/EFNA1/IL7R/CD74/ST3GAL1/ADA/DOCK8/CD27/BCL6/PRKCQ 11

BP GO:2000193 positive regulation of fatty acid transport 11/2416 31/18862 0.00107686867201329 0.00718716381321299 0.00500765829090874 CYP4F2/IL1B/FABP3/EDN1/KMO/PTGES/STXBP1/TNFSF11/P2RX4/ACSL1/MAP2K6 11

BP GO:0060401 cytosolic calcium ion transport 37/2416 173/18862 0.00108074521301416 0.00720496808676105 0.00502006342322013 CXCL9/THY1/LYN/SRI/CX3CL1/TMEM38B/FYN/SLC25A23/UBASH3B/PTPRC/APLNR/CXCL10/CXCL11/RAMP3/CORO1A/AFG3L2/TRPV1/CLIC2/CAV1/ITPR1/P2RX5/LCK/CCL21/CCL19/CCR7/TMEM38A/PLCG2/CD19/MS4A1/FGF2/MCOLN2/P2RX4/FAM155A/PTPN6/PKD2/CCR5/DHRS7C 37

BP GO:0071385 cellular response to glucocorticoid stimulus 16/2416 55/18862 0.00108387223599699 0.00721774137043806 0.00502896321200603 PCK2/ANXA1/ICAM1/PCK1/CFLAR/DDIT4/EDN1/ASS1/SERPINF1/STC1/GJB2/SRD5A1/ZFP36/AQP1/ADCYAP1/ERRFI1 16

BP GO:0005996 monosaccharide metabolic process 53/2416 272/18862 0.00111152335348487 0.0073936151638056 0.00515150332412806 SLC23A1/NPY1R/NLN/ENPP1/PDK2/RBKS/DHDH/CPT1A/PFKFB3/PCK2/SIK1/PPARGC1A/IRS1/PGM2L1/PGM1/PCK1/LCMT1/PPP1R3B/PDHA1/INSR/PMM1/MLYCD/GLYCTK/MDH2/SLC2A3/CHST15/DGKQ/SORD/PFKFB2/GALM/PDK4/FUT8/DYRK2/CREM/PGD/GOT1/FUT1/AKR1B1/SLC25A10/PMAIP1/TNF/SLC37A4/RPIA/GPT/PDK1/DCXR/ENO2/ALDOB/GSTO2/PHLDA2/APOD/MST1/ALDH1A1 53

BP GO:0030500 regulation of bone mineralization 20/2416 76/18862 0.00112166883636763 0.00745278290384737 0.00519272846267713 ANKH/ENPP1/HIF1A/GREM1/ACVR2A/TWIST1/MGP/BMP7/DDR2/S1PR1/LTF/SRGN/CYP27B1/PKDCC/CCR1/ISG15/TRPM4/ECM1/TMEM119/OSR1 20

BP GO:0002790 peptide secretion 73/2416 401/18862 0.00113057859156509 0.00747213379406485 0.00520621120056267 SLC16A1/S100A8/PIM3/CPT1A/SRI/HIF1A/PCK2/HLA-DRB1/IL1B/ANXA1/IRS1/NECAB3/EFNA5/ARFGAP3/NR1H4/GJA1/VEGFC/PAM/CAMK2N1/ACVR1C/CD74/GNPTAB/KLF7/STEAP3/PPID/HADH/CD38/EDN1/PDIA4/IL1RN/HNF4A/JAK2/EDN3/NOS2/PFKFB2/PLEK/RAB13/ITPR1/UCP2/ACSL4/EXPH5/MYH10/LTBP2/RHBDF2/TLR2/SEL1L/RCN3/HNF1B/APLN/IL1A/PCLO/RAB8B/LLGL2/TNFSF11/RAPGEF4/ILDR1/TNF/CACNA1D/TRPM4/IL6/OLFM2/HMGCR/ADAM9/F2RL1/IFNG/ADCYAP1/TLR4/VSNL1/CD33/PPY/TCIRG1/NMU/CHGA 73

BP GO:0002604 regulation of dendritic cell antigen processing and presentation 6/2416 11/18862 0.00113962577496727 0.00747213379406485 0.00520621120056267 NOD2/CD74/CCL21/FCGR2B/CCL19/CCR7 6

BP GO:0002645 positive regulation of tolerance induction 6/2416 11/18862 0.00113962577496727 0.00747213379406485 0.00520621120056267 IRAK3/IDO1/LILRB2/CD274/LILRB4/CD3E 6

BP GO:0019371 cyclooxygenase pathway 6/2416 11/18862 0.00113962577496727 0.00747213379406485 0.00520621120056267 TBXAS1/PTGDS/PTGES/PTGS2/HPGDS/AKR1C3 6

BP GO:0032306 regulation of prostaglandin secretion 6/2416 11/18862 0.00113962577496727 0.00747213379406485 0.00520621120056267 IL1B/EDN1/PTGES/TNFSF11/P2RX4/MAP2K6 6

BP GO:0032308 positive regulation of prostaglandin secretion 6/2416 11/18862 0.00113962577496727 0.00747213379406485 0.00520621120056267 IL1B/EDN1/PTGES/TNFSF11/P2RX4/MAP2K6 6

BP GO:0045348 positive regulation of MHC class II biosynthetic process 6/2416 11/18862 0.00113962577496727 0.00747213379406485 0.00520621120056267 XBP1/IL33/JAK2/CIITA/IFNG/TLR4 6

BP GO:0046643 regulation of gamma-delta T cell activation 6/2416 11/18862 0.00113962577496727 0.00747213379406485 0.00520621120056267 NOD2/LILRB1/PTPRC/EGR3/LEF1/NCKAP1L 6

BP GO:0070757 interleukin-35-mediated signaling pathway 6/2416 11/18862 0.00113962577496727 0.00747213379406485 0.00520621120056267 STAT1/JAK2/STAT3/IL27RA/STAT4/EBI3 6

BP GO:0097048 dendritic cell apoptotic process 6/2416 11/18862 0.00113962577496727 0.00747213379406485 0.00520621120056267 LYN/LILRB1/CCL21/CCL19/CCR7/CXCL12 6

BP GO:1902563 regulation of neutrophil activation 6/2416 11/18862 0.00113962577496727 0.00747213379406485 0.00520621120056267 PLA2G2A/ITGB2/PTAFR/FCGR2B/CD300A/CD177 6

BP GO:2000668 regulation of dendritic cell apoptotic process 6/2416 11/18862 0.00113962577496727 0.00747213379406485 0.00520621120056267 LYN/LILRB1/CCL21/CCL19/CCR7/CXCL12 6

BP GO:0019217 regulation of fatty acid metabolic process 24/2416 98/18862 0.00114987655312845 0.00753105962268742 0.00524726778726632 PDK2/CPT1A/ABCB11/IL1B/ANXA1/PPARGC1A/IRS1/PPARG/LPGAT1/TWIST1/FABP3/MLYCD/CD74/APPL2/CAV1/PDK4/SCAP/NR4A3/PDP1/PTGS2/FABP1/APOC1/APOC2/PDK1 24

BP GO:0043297 apical junction assembly 22/2416 87/18862 0.00115681009518221 0.00756815386090669 0.00527311320757275 CLDN2/PECAM1/RAMP2/MPP7/CLDN15/ESAM/GJA1/CLDN1/MARVELD3/CDH5/FZD5/CLDN8/RAB13/EPHA2/CLDN23/OCLN/PRKCH/TNF/GRHL2/CLDN7/MARVELD2/SNAI2 22

BP GO:0051259 protein complex oligomerization 46/2416 229/18862 0.00119810646358325 0.00782973083657477 0.00545536703466752 CLYBL/RNF135/KCND3/HLA-DRB1/TRPM6/COL1A2/ZC3H12A/TMEM120A/AQP11/LRRC8C/KCNV1/KCTD4/EHD3/TDO2/GBP5/MLKL/ALAD/CD74/CLDN1/RNF213/UGDH/CRTC3/APPL2/TRPV1/HOMER1/SOD2/STEAP4/SHMT2/ALDH1A2/MIF/MS4A1/KCNA2/HSD17B8/CTH/ACOT13/TRPM4/KCNA3/EVL/PRF1/BLM/KCNJ2/PKD2/KCTD14/ALDH1A3/KCTD9/ALOX5AP 46

BP GO:0002369 T cell cytokine production 12/2416 36/18862 0.00121722511809386 0.0079459602451691 0.00553634990589758 CD55/IL1B/SASH3/TNFRSF1B/IL18R1/FZD5/MALT1/IL1R1/LILRB4/SMAD7/TRPM4/IL6 12

BP GO:0010758 regulation of macrophage chemotaxis 10/2416 27/18862 0.00123766362822844 0.00805292055048199 0.00561087452696069 SLAMF8/RARRES2/MMP28/CXCL17/MIF/CSF1R/C3AR1/C5AR1/STAP1/MST1 10

BP GO:0010955 negative regulation of protein processing 10/2416 27/18862 0.00123766362822844 0.00805292055048199 0.00561087452696069 CST7/CHAC1/LRRK2/NLRP7/CARD8/TMEM98/GLG1/SERPINE1/GAS1/IL1R2 10

BP GO:1903318 negative regulation of protein maturation 10/2416 27/18862 0.00123766362822844 0.00805292055048199 0.00561087452696069 CST7/CHAC1/LRRK2/NLRP7/CARD8/TMEM98/GLG1/SERPINE1/GAS1/IL1R2 10

BP GO:0097191 extrinsic apoptotic signaling pathway 44/2416 217/18862 0.00124300713860156 0.0080788686434736 0.00562895386762687 PEA15/FAIM2/BCL2L10/IL1B/BCL2A1/UNC5B/FGFR3/STRADB/ICAM1/EYA2/FYN/PTPRC/BAG3/IL33/CFLAR/PF4/TNFRSF1B/TNFRSF10B/G0S2/ERBB3/ITPRIP/JAK2/TIMP3/AGT/CAV1/HYAL2/CD27/HGF/BMP5/IL1A/TRAF1/PMAIP1/MLLT11/TNFRSF12A/ITGAV/TNF/SH3RF1/INHBA/SERPINE1/TNFRSF10C/TNFAIP3/IFNG/SFRP2/SNAI2 44

BP GO:0033673 negative regulation of kinase activity 52/2416 267/18862 0.00124472574093061 0.00808084214782467 0.00563032890730631 IRAK3/DUSP4/THY1/LYN/IL1B/RGS2/TRIB2/PKIB/SH3BP5/CDKN2B/LAX1/SOCS3/SOCS1/UBASH3B/PTPRC/CAMK2N1/DNAJA1/HEG1/PDCD4/PKIA/ITPRIP/GMFG/AGT/CEBPA/DUSP14/DUSP21/CAV1/RHOH/HYAL2/BMP7/CBLC/RASIP1/WWTR1/DUSP10/PTK6/RGS4/LILRB4/DUSP22/HHEX/PKN1/CD300A/PTPN6/PPP1R1B/PRKAR2B/TNFAIP3/IFNG/SERPINB3/FABP4/SH2B3/PRKAR1A/SFRP2/ERRFI1 52

BP GO:0071277 cellular response to calcium ion 21/2416 82/18862 0.00124602247212263 0.00808084214782467 0.00563032890730631 HSPA5/CHP2/SLC25A23/SYT11/HPCA/JUNB/EDN1/SYT17/EEF2K/CLIC4/CPNE2/FOS/WNT5A/PKD2/CPNE5/RASGRP2/ENDOG/AKR1C3/SYT13/FOSB/ALOX5AP 21

BP GO:0030193 regulation of blood coagulation 18/2416 66/18862 0.00124987705254919 0.00809702960129691 0.00564160751980154 SERPING1/UBASH3B/PLAU/F3/PLAUR/CD34/THBD/TFPI/EDN1/APOH/FAP/CAV1/CD36/KLKB1/ST3GAL4/SERPINE1/F2RL1/SH2B3 18

BP GO:1902882 regulation of response to oxidative stress 23/2416 93/18862 0.00125195436781437 0.00810168081669233 0.00564484825536052 MMP3/VNN1/ACOX2/HIF1A/PDE8A/FYN/MIR21/SLC7A11/PINK1/BMP7/P4HB/FUT8/SOD2/HGF/LRRK2/NR4A3/CD36/FBLN5/FBXW7/ENDOG/TLR4/MCTP1/H19 23

BP GO:0043281 regulation of cysteine-type endopeptidase activity involved in apoptotic process 42/2416 205/18862 0.00128257960121427 0.00829086163040895 0.00577666003743612 S100A8/CASP1/MMP9/BCL2L10/MAP3K5/LAMP3/CTSH/SERPINB9/MT3/S100A9/TNFAIP8/PPARG/CD44/ROBO1/LAPTM5/FAM162A/VIL1/CFLAR/F3/ACVR1C/PLAUR/TNFRSF10B/JAK2/VCP/CD27/MALT1/LCK/HERPUD1/HGF/CYCS/CARD8/NLRP1/FABP1/PMAIP1/TNF/SH3RF1/SLC1A1/AQP1/KLF4/GRAMD4/XDH/SFRP2 42

BP GO:0009914 hormone transport 59/2416 312/18862 0.00129070196448815 0.00833432687795163 0.00580694446017647 SLC16A1/PIM3/CPT1A/LYN/SRI/HIF1A/PCK2/HLA-DRB1/IL1B/ANXA1/SLC7A5/ADM/IRS1/EFNA5/NR1H4/GJA1/CAMK2N1/ACVR1C/KLF7/HADH/CD38/EDN1/P2RY1/IL1RN/HNF4A/JAK2/EDN3/AGT/NOS2/BTK/SLC16A2/PFKFB2/ITPR1/UCP2/ACSL4/HNF1B/APLN/PCLO/RAB8B/TNFSF11/RAPGEF4/ILDR1/TTR/SPP1/TNF/CACNA1D/TRPM4/LIF/INHBA/IL6/IFNG/ADCYAP1/VSNL1/OSM/TCIRG1/IL11/NMU/CRYM/CHGA 59

BP GO:0046686 response to cadmium ion 17/2416 61/18862 0.00130175313961411 0.00839658951525983 0.00585032596921583 MMP9/MT3/SPARC/MT1G/ALAD/MT1F/MT1M/SORD/MT1E/SOD2/GOT1/MT1X/MT2A/FOS/CAT/SLC30A1/AKR1C3 17

BP GO:0035272 exocrine system development 13/2416 41/18862 0.00130514327487568 0.008400274209783 0.00585289328110101 FGFR2/TGM2/TWSG1/LAMA1/CLCN2/PLXND1/BMP7/HGF/ESRP2/TNF/TFCP2L1/NTN4/LAMA5 13

BP GO:0046596 regulation of viral entry into host cell 13/2416 41/18862 0.00130514327487568 0.008400274209783 0.00585289328110101 IFITM3/IFITM2/IFITM1/HLA-DRB1/TRIM22/CD74/CIITA/FCN1/P4HB/LGALS1/FCN3/LY6E/TMPRSS4 13

BP GO:0043406 positive regulation of MAP kinase activity 46/2416 230/18862 0.00131558884524211 0.00844033333374253 0.00588080448633244 PEA15/MAP3K5/IL1B/PLCE1/CD40/NOD2/FPR1/TGFA/ROBO1/PTPRC/INSR/MLKL/PDGFRB/PROK2/CD74/EDN1/MAPKAPK2/FZD5/EDN3/AGT/RIPK2/RASGRP1/S100A12/CXCR4/TNIK/PIK3R5/HGF/AVPI1/CXCL17/CCL19/MAP4K1/LRRK2/PKN1/FGF2/TNFSF11/TNF/C5AR1/WNT5A/GHR/NRG1/FZD10/MUC20/TLR4/ADORA2B/MAP2K6/DKK1 46

BP GO:0098657 import into cell 46/2416 230/18862 0.00131558884524211 0.00844033333374253 0.00588080448633244 SLC6A14/SLC36A1/NEURL1B/GLUL/RGS2/SLC7A5/SLC39A5/KCNJ8/SLC6A20/FYN/FABP3/KCNE2/SLC7A11/HPCA/RAMP3/IL10RA/SLC2A3/SLC6A6/SLC15A3/TRPV1/SLC16A2/SLC22A4/SLC39A4/SLC1A3/RGS4/SLC1A4/LTF/CD36/KCNJ10/SLC27A4/SLC5A1/MX2/ITGA4/FAM155A/TRPM4/KCNJ2/WNK4/KCNJ15/SLC27A2/SLC1A1/SLC15A2/IFNG/SLC30A1/ACSL1/SLC9A2/DNM1 46

BP GO:0051346 negative regulation of hydrolase activity 81/2416 456/18862 0.00131561571594745 0.00844033333374253 0.00588080448633244 TIMP1/PI3/COL6A3/IFI16/SERPINB5/SERPINA1/MMP9/LAMP3/MYO1D/SERPINA3/SERPING1/C3/ANXA1/RGS2/SPHK2/SPINK2/SERPINB9/MT3/TNFAIP8/CST7/CD44/IQGAP2/SAG/MIR21/VIL1/PLAUR/TFPI/SERPINA6/TIMP3/CR1/AGT/PPP1R14C/SERPINF1/SEMA4D/RHOH/CD27/HERPUD1/SPINK5/HGF/NCKAP1L/CSTA/SLPI/GNAI2/SERPINI1/PPP1R14A/LTF/SPOCK2/PAPLN/LRRK2/SERPINB7/NLRP7/SPINT1/CARD8/SLC27A4/BST2/FABP1/RCC2/SERPINH1/CNST/SYTL2/APOC1/TNF/ECM1/TIMP2/PPP1R1B/SPINK4/FZD10/PPP1R14D/SH3RF1/SERPINE1/AQP1/KLF4/FICD/ELFN1/SERPINB3/SH3RF2/ADCYAP1/COL7A1/TFPI2/PCSK1N/SFRP2 81

BP GO:0071901 negative regulation of protein serine/threonine kinase activity 32/2416 145/18862 0.00132299215096273 0.00847853034380419 0.00590741826321221 IRAK3/DUSP4/LYN/IL1B/RGS2/PKIB/CDKN2B/LAX1/DNAJA1/HEG1/PDCD4/PKIA/AGT/CEBPA/DUSP14/DUSP21/CAV1/HYAL2/BMP7/CBLC/RASIP1/DUSP10/RGS4/HHEX/CD300A/PTPN6/PRKAR2B/TNFAIP3/SERPINB3/SH2B3/PRKAR1A/SFRP2 32

BP GO:0019886 antigen processing and presentation of exogenous peptide antigen via MHC class II 24/2416 99/18862 0.00133679245814006 0.00854845506274027 0.00595613832965567 OSBPL1A/SEC13/HLA-DMA/SEC24D/HLA-DRB1/IFI30/CTSE/SEC24A/CD74/HLA-DRA/KIFAP3/HLA-DMB/HLA-DOB/FCER1G/RILP/FCGR2B/HLA-DPA1/SH3GL2/HLA-DPB1/LAG3/SEC24C/AP1M2/HLA-DQB1/HLA-DQA1 24

BP GO:0043279 response to alkaloid 24/2416 99/18862 0.00133679245814006 0.00854845506274027 0.00595613832965567 PEA15/HSPA5/CPT1A/ABAT/PPARGC1A/TMEM38B/PPARG/ICAM1/DDC/HNMT/TRPV1/ADA/HOMER1/CXCR4/CASP6/RGS4/TMEM38A/SDK1/BLM/PPP1R1B/UQCRC1/BCHE/FOSB/HSP90AB1 24

BP GO:0019748 secondary metabolic process 16/2416 56/18862 0.00133964044104017 0.00854845506274027 0.00595613832965567 CDH3/OPN3/SLC45A2/BDH2/PAM/SLC7A11/DDC/ZEB2/AKR1B10/AKR1B1/WNT5A/AKR1C3/PON3/AKR7A3/FMO1/TYRP1 16

BP GO:0060135 maternal process involved in female pregnancy 16/2416 56/18862 0.00133964044104017 0.00854845506274027 0.00595613832965567 RGS2/BSG/MMP7/GJA1/ANGPT2/PAM/APOL2/VDR/JUNB/STC1/IHH/CYP27B1/AKR1B1/GJB2/SPP1/LIF 16

BP GO:0010634 positive regulation of epithelial cell migration 37/2416 175/18862 0.00134510548094155 0.00857414830632264 0.00597404010392844 SEMA5A/MMP9/HIF1A/ANXA1/EPB41L5/CTSH/ZC3H12A/CD40/EPB41L4B/VEGFC/MIR21/SPARC/VIL1/RHOJ/PLK2/TEK/EDN1/CCR6/CALR/AGT/KDR/ETS1/MAP4K4/ANXA3/ENPP2/FUT1/PTGS2/PLCG2/PIK3CD/FGF2/P2RX4/ITGA2/WNT5A/ADAM9/STAT5A/IFNG/HYAL1 37

BP GO:0043303 mast cell degranulation 14/2416 46/18862 0.00134899256289024 0.00858094577959328 0.00597877624523057 LYN/FGR/SPHK2/RAC2/PTGDR/IL13RA2/PTGDS/BTK/STXBP1/NR4A3/PIK3CD/CD300A/FOXF1/CHGA 14

BP GO:0009308 amine metabolic process 35/2416 163/18862 0.00134905137508035 0.00858094577959328 0.00597877624523057 VCAM1/NAAA/PSMB9/KYNU/IDO1/SULT1A2/ITGB2/NR1H4/DAO/SRM/AGMAT/MIR21/TDO2/OAZ2/SLC7A11/SULT1A1/SLC7A7/DDC/SLC44A1/HNMT/KMO/MAOA/CHKA/PSMB8/GDPD3/AKR1B1/NAPEPLD/CHDH/NR4A2/SULT1B1/IDO2/PSMA8/SULT1C2/HDC/TPH1 35

BP GO:0010718 positive regulation of epithelial to mesenchymal transition 15/2416 51/18862 0.00135774109468696 0.00860865630248328 0.00599808355939536 GCNT2/PDPN/IL1B/OLFM1/FERMT2/MIR21/TWIST1/LEF1/BMP7/COL1A1/WWTR1/ENG/IL6/SERPINB3/BAMBI 15

BP GO:0046850 regulation of bone remodeling 15/2416 51/18862 0.00135774109468696 0.00860865630248328 0.00599808355939536 GREM1/UBASH3B/CD38/DEF8/GPR137B/PDK4/S1PR1/CSF1R/CA2/TNFSF11/SPP1/IL6/TNFAIP3/TNFRSF11B/TMEM119 15

BP GO:0071715 icosanoid transport 15/2416 51/18862 0.00135774109468696 0.00860865630248328 0.00599808355939536 PLA2G2A/CYP4F2/PLA2G12B/IL1B/ANXA1/EDN1/NOS2/PTGES/PLA2G12A/ABCC1/PLA2G2D/ABCC3/TNFSF11/P2RX4/MAP2K6 15

BP GO:0009081 branched-chain amino acid metabolic process 9/2416 23/18862 0.00137765917487901 0.00870715660899139 0.00606671367404999 ACAT1/ALDH6A1/HIBCH/PPM1K/AUH/SDSL/BCAT1/ACADSB/BCKDHB 9

BP GO:0051043 regulation of membrane protein ectodomain proteolysis 9/2416 23/18862 0.00137765917487901 0.00870715660899139 0.00606671367404999 TIMP1/IL1B/TNFRSF1B/TIMP3/TNF/TIMP2/PTPN3/ADAM9/IFNG 9

BP GO:0060571 morphogenesis of an epithelial fold 9/2416 23/18862 0.00137765917487901 0.00870715660899139 0.00606671367404999 FGFR2/HIF1A/SULF1/OVOL2/BMP7/BMP5/WNT5A/SOSTDC1/WNT2 9

BP GO:0002827 positive regulation of T-helper 1 type immune response 7/2416 15/18862 0.00140944105986 0.00885170570786679 0.00616742829698596 IL1B/IL18R1/IL12RB1/RIPK2/IL27RA/IL1R1/IL23A 7

BP GO:0006000 fructose metabolic process 7/2416 15/18862 0.00140944105986 0.00885170570786679 0.00616742829698596 PFKFB3/GLYCTK/SORD/PFKFB2/AKR1B1/ALDOB/ALDH1A1 7

BP GO:0010273 detoxification of copper ion 7/2416 15/18862 0.00140944105986 0.00885170570786679 0.00616742829698596 MT3/MT1G/MT1F/MT1M/MT1E/MT1X/MT2A 7

BP GO:0010934 macrophage cytokine production 7/2416 15/18862 0.00140944105986 0.00885170570786679 0.00616742829698596 IRAK3/LILRB1/LAPTM5/CD74/CD36/WNT5A/TLR4 7

BP GO:0055091 phospholipid homeostasis 7/2416 15/18862 0.00140944105986 0.00885170570786679 0.00616742829698596 ABCB11/FABP3/HNF4A/LIPG/RCN3/CETP/TLCD2 7

BP GO:1990169 stress response to copper ion 7/2416 15/18862 0.00140944105986 0.00885170570786679 0.00616742829698596 MT3/MT1G/MT1F/MT1M/MT1E/MT1X/MT2A 7

BP GO:0010743 regulation of macrophage derived foam cell differentiation 11/2416 32/18862 0.00145306727648306 0.00909693378974689 0.00633829102800274 PLA2G2A/PPARG/PF4/AGT/CD36/LPL/CETP/PRKCH/ITGAV/NFKBIA/ABCA5 11

BP GO:0019359 nicotinamide nucleotide biosynthetic process 11/2416 32/18862 0.00145306727648306 0.00909693378974689 0.00633829102800274 NNMT/PARP9/KYNU/IDO1/NMNAT3/KMO/NAMPT/NMNAT1/PTGS2/NUDT12/IDO2 11

BP GO:0019363 pyridine nucleotide biosynthetic process 11/2416 32/18862 0.00145306727648306 0.00909693378974689 0.00633829102800274 NNMT/PARP9/KYNU/IDO1/NMNAT3/KMO/NAMPT/NMNAT1/PTGS2/NUDT12/IDO2 11

BP GO:0009110 vitamin biosynthetic process 8/2416 19/18862 0.00145705859045912 0.00911234963183251 0.00634903202005992 PSAT1/CYP27A1/CYP3A4/CYP27B1/RFK/TNF/IFNG/SNAI2 8

BP GO:1904705 regulation of vascular associated smooth muscle cell proliferation 21/2416 83/18862 0.00147020899692883 0.00917533572952441 0.00639291760031328 MMP9/MAP3K5/PPARG/ADAMTS1/GJA1/MIR21/NQO2/IGFBP5/PDCD4/EDN1/JAK2/EFEMP2/SOD2/GNAI2/FGF9/NR4A3/APLN/HPGD/FGF2/TNF/MIR214 21

BP GO:1990874 vascular associated smooth muscle cell proliferation 21/2416 83/18862 0.00147020899692883 0.00917533572952441 0.00639291760031328 MMP9/MAP3K5/PPARG/ADAMTS1/GJA1/MIR21/NQO2/IGFBP5/PDCD4/EDN1/JAK2/EFEMP2/SOD2/GNAI2/FGF9/NR4A3/APLN/HPGD/FGF2/TNF/MIR214 21

BP GO:0002637 regulation of immunoglobulin production 18/2416 67/18862 0.00150770717999649 0.00934088855798239 0.00650826657740031 CD40/XBP1/PTPRC/IL33/SASH3/IL13RA2/CR1/CLCF1/FCGR2B/MAD2L2/FCRL3/IL27RA/TNFSF13/PKN1/BCL6/TNF/CD22/IL6 18

BP GO:0010812 negative regulation of cell-substrate adhesion 18/2416 67/18862 0.00150770717999649 0.00934088855798239 0.00650826657740031 GCNT2/MMP12/GBP1/CX3CL1/EFNA5/TACSTD2/ANGPT2/HOXA7/SEMA3E/MAP4K4/COL1A1/LGALS1/DUSP22/BCL6/MMP14/RCC2/SERPINE1/APOD 18

BP GO:0033866 nucleoside bisphosphate biosynthetic process 18/2416 67/18862 0.00150770717999649 0.00934088855798239 0.00650826657740031 PDK2/SLC26A2/ACAT1/PDHA1/MLYCD/PPT1/ACSS2/PANK3/SCD/PANK1/PDK4/ACSL4/PAPSS2/PDP1/PAPSS1/HSD17B8/PDK1/ACSL1 18

BP GO:0034030 ribonucleoside bisphosphate biosynthetic process 18/2416 67/18862 0.00150770717999649 0.00934088855798239 0.00650826657740031 PDK2/SLC26A2/ACAT1/PDHA1/MLYCD/PPT1/ACSS2/PANK3/SCD/PANK1/PDK4/ACSL4/PAPSS2/PDP1/PAPSS1/HSD17B8/PDK1/ACSL1 18

BP GO:0034033 purine nucleoside bisphosphate biosynthetic process 18/2416 67/18862 0.00150770717999649 0.00934088855798239 0.00650826657740031 PDK2/SLC26A2/ACAT1/PDHA1/MLYCD/PPT1/ACSS2/PANK3/SCD/PANK1/PDK4/ACSL4/PAPSS2/PDP1/PAPSS1/HSD17B8/PDK1/ACSL1 18

BP GO:0050918 positive chemotaxis 18/2416 67/18862 0.00150770717999649 0.00934088855798239 0.00650826657740031 SEMA5A/DEFB4A/CX3CL1/VEGFC/ANGPT2/F3/CXCL10/CORO1A/KDR/HGF/S1PR1/MIF/FGF2/ITGA2/WNT5A/F2RL1/FPR2/CXCL12 18

BP GO:1900046 regulation of hemostasis 18/2416 67/18862 0.00150770717999649 0.00934088855798239 0.00650826657740031 SERPING1/UBASH3B/PLAU/F3/PLAUR/CD34/THBD/TFPI/EDN1/APOH/FAP/CAV1/CD36/KLKB1/ST3GAL4/SERPINE1/F2RL1/SH2B3 18

BP GO:1904062 regulation of cation transmembrane transport 63/2416 340/18862 0.00152707051112133 0.00945102829312889 0.00658500646704229 DPP10/CXCL9/THY1/MMP9/LYN/SRI/ANK3/RGS2/NETO2/SPHK2/PPARGC1A/SESTD1/CX3CL1/TMEM38B/CCL2/FYN/EHD3/MIR21/TWIST1/UBASH3B/SLC9A3R1/KCNE2/APLNR/CXCL10/CXCL11/HPCA/PDE4B/FXYD5/GLRX/RAMP3/GEM/STOM/CORO1A/EDN3/HECW2/PINK1/CLIC2/CAV1/GPD1L/HOMER1/RGS4/NEDD4L/FXYD3/TMEM38A/SHANK3/PLCG2/CD19/RASGRF2/PDZK1/CACNA1D/PTPN6/FLNA/PTPN3/KCNJ2/PKD2/WNK4/IFNG/SLC30A1/DHRS7C/GPR35/TCIRG1/OSR1/RELN 63

BP GO:0071559 response to transforming growth factor beta 50/2416 257/18862 0.00156136991701074 0.00965328288940251 0.00672592741057805 GCNT2/FGFR2/HSPA5/PBLD/PMEPA1/TWSG1/FERMT2/EPB41L5/COL1A2/PPARGC1A/CDKN2B/FYN/CHST11/MIR21/FBN1/CFLAR/CLDN1/HTRA1/CDH5/COL3A1/ZYX/EDN1/OVOL2/APPL2/MXRA5/CAV1/HYAL2/COL4A2/FUT8/COL1A1/LTBP2/LRRC32/GOT1/RUNX3/FMOD/DUSP22/HPGD/HTRA4/LRG1/SMAD7/ENG/GLG1/FOS/WNT5A/ADAM9/CAV2/CGN/BAMBI/HSP90AB1/WNT2 50

BP GO:0045604 regulation of epidermal cell differentiation 17/2416 62/18862 0.00158288601477601 0.00976200449300251 0.00680167921668932 CTSK/GRHL1/MAFF/HOXA7/KLF7/VDR/HES5/AQP3/REG3A/OVOL2/ZBED2/CYP27B1/PRKCH/ZFP36/GRHL2/ESRP1/ERRFI1 17

BP GO:0001570 vasculogenesis 20/2416 78/18862 0.00158386884978749 0.00976200449300251 0.00680167921668932 RAMP2/ADM/PDGFRB/CD34/APLNR/HEG1/JUNB/ZFPM2/TIE1/CAV1/KDR/RASIP1/GJC1/EPHA2/SOX17/ITGAV/ENG/FBXW7/FOXF1/XDH 20

BP GO:0070373 negative regulation of ERK1 and ERK2 cascade 20/2416 78/18862 0.00158386884978749 0.00976200449300251 0.00680167921668932 RPS6KA6/DUSP4/CNKSR3/LYN/GBP1/MIR21/SIRPA/PTPRC/SLC9A3R1/CAMK2N1/TIMP3/SEMA6A/PTPRR/DUSP10/NDRG2/TBC1D10C/LIF/KLF4/TLR4/ERRFI1 20

BP GO:0046633 alpha-beta T cell proliferation 12/2416 37/18862 0.00159409644963243 0.00981489136343934 0.00683852815767718 CD55/TWSG1/IRF1/CD274/PTPRC/RIPK2/IL23A/ELF4/EBI3/CD3E/SH3RF1/RASAL3 12

BP GO:0009165 nucleotide biosynthetic process 51/2416 264/18862 0.00165321396267487 0.0101595816904644 0.00707869123434866 PDK2/NNMT/PARP9/KYNU/IDO1/SLC26A2/SPHK2/PDZD3/PPARGC1A/ACAT1/NMNAT3/PDHA1/MLYCD/AK3/GUCA2B/PPT1/HPCA/ADCY3/AMPD1/ACSS2/PANK3/SCD/KMO/NOS2/PINK1/PANK1/VCP/GUCA2A/ADA/NAMPT/PDK4/ACSL4/NME1/NMNAT1/PAPSS2/ME1/PDP1/PTGS2/PAPSS1/HSD17B8/RRM2/PNP/RFK/ADCY6/GUCY2C/ADCY4/NUDT12/PDK1/ACSL1/IDO2/H19 51

BP GO:0090066 regulation of anatomical structure size 86/2416 493/18862 0.00165348896640109 0.0101595816904644 0.00707869123434866 SEMA5A/EDN2/MSN/PEX11A/CCL11/OLFM1/RGS2/HCLS1/SCTR/ADM/MT3/AQP11/ESAM/ICAM1/IQGAP2/GJA1/MIR21/PTAFR/VIL1/ARHGAP42/SEMA4A/SLC9A3R1/IL7R/VAV3/COTL1/PRR16/VAV1/SCIN/CD38/EDN1/P2RY1/CORO1A/GMFG/EDN3/AGT/PLEK/SEMA6A/CAV1/EDNRA/SEMA4D/SPIRE2/SEMA3E/RILP/PEX11G/ARPC1B/BAIAP2L2/CCL21/SOD2/NCKAP1L/CCR7/DBN1/KANK4/WASL/PREX1/LRRK2/HNF1B/APLN/SHANK3/WAS/HCK/WASF1/CDHR5/SWAP70/SPP1/ADCY6/TRPM4/EVL/SEMA6D/MYADM/WNT5A/FN1/USH1C/F2RL1/MIR214/SMTNL2/AQP1/SH3BP1/PFN2/NRCAM/HSP90AB1/SCNN1B/CXCL12/CSF3/CDHR2/CDC42EP5/CPS1 86

BP GO:0006509 membrane protein ectodomain proteolysis 13/2416 42/18862 0.00167153230042485 0.010228267464612 0.00712654806568251 TIMP1/BACE2/IL1B/MMP7/TNFRSF1B/TIMP3/ADAM19/PRKCQ/TNF/TIMP2/PTPN3/ADAM9/IFNG 13

BP GO:0045616 regulation of keratinocyte differentiation 13/2416 42/18862 0.00167153230042485 0.010228267464612 0.00712654806568251 CTSK/GRHL1/HOXA7/VDR/AQP3/REG3A/OVOL2/ZBED2/CYP27B1/PRKCH/ZFP36/GRHL2/ERRFI1 13

BP GO:0046688 response to copper ion 13/2416 42/18862 0.00167153230042485 0.010228267464612 0.00712654806568251 MT3/ICAM1/PAM/MT1G/MT1F/MT1M/SORD/MT1E/IL1A/MT1X/MT2A/AQP1/SOD3 13

BP GO:0071604 transforming growth factor beta production 13/2416 42/18862 0.00167153230042485 0.010228267464612 0.00712654806568251 CDH3/LUM/HIF1A/LILRB1/CD34/LRRC32/GATA6/TYROBP/PTGS2/SERPINB7/ITGAV/FN1/HSP90AB1 13

BP GO:0035725 sodium ion transmembrane transport 36/2416 171/18862 0.00167570640697721 0.0102432924980351 0.00713701676170052 SLC6A14/SLC23A1/SLC17A4/ABCB11/ANK3/NETO2/SLC41A1/SLC6A20/SCN9A/SLC9A3R1/SLC20A2/SLC6A19/SLC20A1/FXYD5/GLRX/STOM/CNNM4/SHROOM2/SLC24A3/SLC6A6/HECW2/GPD1L/SLC4A4/SLC4A11/NEDD4L/FXYD3/SLC5A1/HCN3/TRPM4/PTPN3/PKD2/WNK4/SLC6A16/SLC9A2/SCNN1B/OSR1 36

BP GO:0050819 negative regulation of coagulation 15/2416 52/18862 0.00168558558490566 0.0102931250881534 0.00717173763206734 ANXA5/SERPING1/UBASH3B/PLAU/PLAUR/CD34/THBD/TFPI/EDN1/APOH/FAP/PROCR/KLKB1/SERPINE1/SH2B3 15

BP GO:0006814 sodium ion transport 47/2416 239/18862 0.00168895597435049 0.0103031500584738 0.00717872253279393 SLC6A14/SLC23A1/SLC38A4/SLC22A5/SLC17A4/CNKSR3/ABCB11/ANK3/NETO2/SIK1/MAGED2/SLC41A1/SLC6A20/SLC10A2/SCN9A/SLC9A3R1/SLC20A2/SLC6A19/SLC20A1/FXYD5/GLRX/SLC5A11/STOM/CNNM4/SHROOM2/SLC24A3/SLC6A6/HECW2/SLC10A1/SLC22A4/GPD1L/SLC4A4/SLC4A11/NEDD4L/FXYD3/SLC13A2/SLC5A1/P2RX4/HCN3/TRPM4/PTPN3/PKD2/WNK4/SLC6A16/SLC9A2/SCNN1B/OSR1 47

BP GO:0035282 segmentation 23/2416 95/18862 0.0016973860339881 0.0103058791480393 0.00718062402667167 HOXA2/EPB41L5/PLXNA2/BASP1/HES5/COBL/FZD5/MEOX1/LEF1/MEOX2/CDX2/TIFAB/ALDH1A2/EGR2/MAFB/NRARP/WNT5A/HOXD8/MLLT3/FOXF1/CDX1/SFRP2/OSR1 23

BP GO:2001243 negative regulation of intrinsic apoptotic signaling pathway 23/2416 95/18862 0.0016973860339881 0.0103058791480393 0.00718062402667167 VNN1/MMP9/BCL2L10/HIF1A/CD44/XBP1/MIR21/MUC1/PLAUR/CD74/DNAJA1/HYOU1/GRINA/PINK1/CLU/HERPUD1/SOD2/LRRK2/MIF/ZNF385A/SFRP2/CXCL12/SNAI2 23

BP GO:0007157 heterophilic cell-cell adhesion via plasma membrane cell adhesion molecules 14/2416 47/18862 0.00169804921533131 0.0103058791480393 0.00718062402667167 VCAM1/ITGA5/SELP/ICAM1/CADM1/REG3A/CEACAM6/ITGAL/ALCAM/CRTAM/DCHS1/SELE/CXADR/HMCN1 14

BP GO:0042572 retinol metabolic process 14/2416 47/18862 0.00169804921533131 0.0103058791480393 0.00718062402667167 SDR16C5/RDH5/ADH6/RETSAT/ADH1C/ALDH1A2/CYP3A4/AKR1B10/AKR1B1/TTR/CYP27C1/AKR1C3/ALDH1A3/ALDH1A1 14

BP GO:0097028 dendritic cell differentiation 14/2416 47/18862 0.00169804921533131 0.0103058791480393 0.00718062402667167 LYN/LILRB2/LILRB1/CEBPB/BATF3/FCGR2B/CCL19/CCR7/SPI1/IRF4/BATF2/BATF/F2RL1/IRF8 14

BP GO:0006767 water-soluble vitamin metabolic process 21/2416 84/18862 0.00172789719293067 0.0104657187701898 0.00729199232575042 SLC23A1/SLC19A3/VNN1/MTHFD2/ENPP1/CLYBL/TCN1/TPK1/PSAT1/SLC2A3/MTHFD1L/ABCC1/SHMT2/VNN2/RFK/GSTO2/ACP5/PRSS3/PRSS1/SLC25A32/AOX1 21

BP GO:1900407 regulation of cellular response to oxidative stress 21/2416 84/18862 0.00172789719293067 0.0104657187701898 0.00729199232575042 MMP3/VNN1/HIF1A/PDE8A/FYN/MIR21/SLC7A11/PINK1/BMP7/P4HB/FUT8/SOD2/HGF/LRRK2/NR4A3/CD36/FBLN5/FBXW7/ENDOG/TLR4/H19 21

BP GO:0051928 positive regulation of calcium ion transport 27/2416 118/18862 0.00174675700205526 0.0105692098804562 0.00736409978424578 CXCL9/THY1/SRI/SPHK2/CX3CL1/CCL2/EHD3/KCNE2/PDGFRB/APLNR/CXCL10/CXCL11/RAMP3/CCL4/STC1/CAV1/HOMER1/P2RX5/WFS1/PLCG2/CD19/LILRA2/CCR1/P2RX4/CACNA1D/PKD2/CXCL12 27

BP GO:2001242 regulation of intrinsic apoptotic signaling pathway 34/2416 160/18862 0.00188287620368528 0.0113812800952985 0.00792990992157408 S100A8/VNN1/MMP9/BCL2L10/HIF1A/S100A9/CD44/XBP1/MIR21/MUC1/SLC9A3R1/PLAUR/CD74/DNAJA1/HYOU1/GRINA/PINK1/SGMS1/CAV1/CLU/DAPK2/P4HB/LCK/HERPUD1/SOD2/RNF183/LRRK2/MIF/PMAIP1/FBXW7/ZNF385A/SFRP2/CXCL12/SNAI2 34

BP GO:0007568 aging 57/2416 304/18862 0.00188614659232385 0.0113894971532423 0.00793563515887336 TIMP1/VCAM1/KYNU/CCL11/BCL2A1/PPARGC1A/ADM/CX3CL1/MMP7/CDKN2B/CTSC/ICAM1/ITGB2/SLC30A10/ULK3/PCK1/MIR21/TWIST1/KCNE2/PDGFRB/TNFRSF1B/PLK2/CLDN1/DDC/IGFBP5/PDCD4/DNMBP/EDN1/P2RY1/MME/ASS1/CALR/KMO/SERPINF1/ADA/HYAL2/COL4A2/UCP2/FOXO4/SOD2/SCAP/SPI1/LRRK2/DCN/MIF/BCL6/NAPEPLD/GJB2/FOS/TIMP2/SERPINE1/TFCP2L1/CAT/ENDOG/APOD/PAX5/DKK1 57

BP GO:0061180 mammary gland epithelium development 17/2416 63/18862 0.00191345185393291 0.0115426852727127 0.00804236902169754 FGFR2/HIF1A/CCL11/HOXA5/ROBO1/CEBPB/JAK2/EPHA2/IRF6/CSF1R/TNFSF11/WNT5A/DDR1/SOSTDC1/FOXF1/MST1/WNT2 17

BP GO:0002724 regulation of T cell cytokine production 11/2416 33/18862 0.00193037618033406 0.011621254580597 0.00809711220778083 IL1B/SASH3/TNFRSF1B/IL18R1/FZD5/MALT1/IL1R1/LILRB4/SMAD7/TRPM4/IL6 11

BP GO:0032350 regulation of hormone metabolic process 11/2416 33/18862 0.00193037618033406 0.011621254580597 0.00809711220778083 DUOXA2/HIF1A/DUOXA1/PPARGC1A/ADM/CLCN2/DGKQ/EGR1/BMP5/CYP27B1/AKR1C3 11

BP GO:0032753 positive regulation of interleukin-4 production 9/2416 24/18862 0.00195608838462422 0.0117404700628 0.00818017562658882 SLC7A5/IL33/SASH3/CD86/CEBPB/FCER1G/IRF4/PRKCQ/CD3E 9

BP GO:0071294 cellular response to zinc ion 9/2416 24/18862 0.00195608838462422 0.0117404700628 0.00818017562658882 MT3/MT1G/MT1F/MT1M/MT1E/MT1X/MT2A/P2RX4/HVCN1 9

BP GO:1900017 positive regulation of cytokine production involved in inflammatory response 9/2416 24/18862 0.00195608838462422 0.0117404700628 0.00818017562658882 NOD2/MIR21/GBP5/GPSM3/STAT3/TNF/IL6/TLR4/H19 9

BP GO:0003333 amino acid transmembrane transport 23/2416 96/18862 0.00196670754513189 0.0117804793658152 0.00820805211906408 SLC6A14/SLC38A4/SFXN1/SLC36A1/PDPN/SLC3A1/RGS2/SLC7A5/LRRC8C/SFXN3/SLC6A20/SLC7A11/SLC6A19/SLC7A7/PRAF2/SLC6A6/SLC16A2/SLC22A4/SLC1A3/RGS4/SLC1A4/KCNJ10/SLC1A1 23

BP GO:1902476 chloride transmembrane transport 23/2416 96/18862 0.00196670754513189 0.0117804793658152 0.00820805211906408 APOL1/SLC26A2/ANO10/BEST2/CLCN2/GABRP/CLIC2/SLC26A3/ANO5/TTYH3/SLC1A3/SLC1A4/GABRB2/FXYD3/BEST4/CLIC4/CLIC6/ANO9/ANO7/SLC1A1/GABRE/CLCA4/CLCA1 23

BP GO:0046503 glycerolipid catabolic process 19/2416 74/18862 0.00201493115190344 0.0119484739364 0.00832510238062488 LIPC/ABHD5/PNLIPRP2/PRDX6/GPCPD1/FABP3/PLA2G7/FAAH/LIPG/FABP2/ENPP2/GDPD3/LPL/MGLL/FABP1/APOC1/APOC2/FABP4/CPS1 19

BP GO:0071260 cellular response to mechanical stimulus 19/2416 74/18862 0.00201493115190344 0.0119484739364 0.00832510238062488 CASP1/CNN2/IL1B/CD40/MMP7/GJA1/IRF1/BAG3/TNFRSF10B/COL1A1/GOT1/TLR8/ENG/ITGA2/KCNJ2/BNIP3/AQP1/TLR4/CASP5 19

BP GO:0034109 homotypic cell-cell adhesion 21/2416 85/18862 0.00202297594205551 0.0119484739364 0.00832510238062488 PDPN/LYN/ANK3/UBASH3B/SLC7A11/PLAUR/PLEK/STXBP1/PEAR1/LGALS1/TNFSF11/PRKCQ/PTPN6/FLNA/FERMT3/DSC2/FN1/MYL9/DSP/CXADR/SH2B3 21

BP GO:0001952 regulation of cell-matrix adhesion 28/2416 125/18862 0.00203179549651558 0.0119484739364 0.00832510238062488 MMP12/THY1/GREM1/FERMT2/EPB41L5/CX3CL1/EFNA5/HOXA7/PLAU/TEK/CEACAM6/EFEMP2/KDR/SEMA3E/CCL21/MAP4K4/CCR7/CD36/FUT1/DUSP22/BCL6/MMP14/RCC2/CD3E/SKAP1/SERPINE1/DDR1/APOD 28

BP GO:0002664 regulation of T cell tolerance induction 6/2416 12/18862 0.00203284439119289 0.0119484739364 0.00832510238062488 IDO1/LILRB2/IL2RA/LILRB4/CD3E/PHLPP1 6

BP GO:0002713 negative regulation of B cell mediated immunity 6/2416 12/18862 0.00203284439119289 0.0119484739364 0.00832510238062488 C4BPB/CR1/C4BPA/FCGR2B/BCL6/PTPN6 6

BP GO:0002890 negative regulation of immunoglobulin mediated immune response 6/2416 12/18862 0.00203284439119289 0.0119484739364 0.00832510238062488 C4BPB/CR1/C4BPA/FCGR2B/BCL6/PTPN6 6

BP GO:0032490 detection of molecule of bacterial origin 6/2416 12/18862 0.00203284439119289 0.0119484739364 0.00832510238062488 DMBT1/NOD2/LY96/TLR2/TLR1/TLR4 6

BP GO:0035672 oligopeptide transmembrane transport 6/2416 12/18862 0.00203284439119289 0.0119484739364 0.00832510238062488 GJA1/SLC7A11/SLC15A3/ABCC1/CA2/SLC15A2 6

BP GO:0038063 collagen-activated tyrosine kinase receptor signaling pathway 6/2416 12/18862 0.00203284439119289 0.0119484739364 0.00832510238062488 COL4A1/UBASH3B/COL4A2/DDR2/COL1A1/DDR1 6

BP GO:0042117 monocyte activation 6/2416 12/18862 0.00203284439119289 0.0119484739364 0.00832510238062488 DYSF/MT1G/HYAL2/LILRB4/ADAM9/CD33 6

BP GO:0043380 regulation of memory T cell differentiation 6/2416 12/18862 0.00203284439119289 0.0119484739364 0.00832510238062488 HLA-DRB1/PCK1/HLA-DRA/IL12RB1/IL23A/BCL6 6

BP GO:0043455 regulation of secondary metabolic process 6/2416 12/18862 0.00203284439119289 0.0119484739364 0.00832510238062488 CDH3/OPN3/SLC7A11/ZEB2/WNT5A/TYRP1 6

BP GO:0048021 regulation of melanin biosynthetic process 6/2416 12/18862 0.00203284439119289 0.0119484739364 0.00832510238062488 CDH3/OPN3/SLC7A11/ZEB2/WNT5A/TYRP1 6

BP GO:0070493 thrombin-activated receptor signaling pathway 6/2416 12/18862 0.00203284439119289 0.0119484739364 0.00832510238062488 IQGAP2/F2RL2/DGKQ/PLEK/HPGD/F2RL1 6

BP GO:0071801 regulation of podosome assembly 6/2416 12/18862 0.00203284439119289 0.0119484739364 0.00832510238062488 MSN/FSCN1/LCP1/ASAP1/HCK/TNF 6

BP GO:1900376 regulation of secondary metabolite biosynthetic process 6/2416 12/18862 0.00203284439119289 0.0119484739364 0.00832510238062488 CDH3/OPN3/SLC7A11/ZEB2/WNT5A/TYRP1 6

BP GO:1902224 ketone body metabolic process 6/2416 12/18862 0.00203284439119289 0.0119484739364 0.00832510238062488 HMGCS2/ACAT1/BDH1/BDH2/HMGCL/TYRP1 6

BP GO:2001204 regulation of osteoclast development 6/2416 12/18862 0.00203284439119289 0.0119484739364 0.00832510238062488 LILRB1/FBN1/LTF/TYROBP/TNFSF11/FBXW7 6

BP GO:0010742 macrophage derived foam cell differentiation 12/2416 38/18862 0.00206192432378142 0.0120363065325536 0.00838629976526387 PLA2G2A/STAT1/PPARG/PF4/AGT/CD36/LPL/CETP/PRKCH/ITGAV/NFKBIA/ABCA5 12

BP GO:0019433 triglyceride catabolic process 12/2416 38/18862 0.00206192432378142 0.0120363065325536 0.00838629976526387 LIPC/ABHD5/PNLIPRP2/FABP3/LIPG/FABP2/LPL/MGLL/FABP1/APOC2/FABP4/CPS1 12

BP GO:0030279 negative regulation of ossification 12/2416 38/18862 0.00206192432378142 0.0120363065325536 0.00838629976526387 ENPP1/HIF1A/GREM1/CHSY1/SRGN/CCR1/SMAD7/TRPM4/ECM1/LRP4/TPH1/DKK1 12

BP GO:0045823 positive regulation of heart contraction 12/2416 38/18862 0.00206192432378142 0.0120363065325536 0.00838629976526387 EDN2/RGS2/ADM/EDN1/EDN3/ADA/RGS4/APLN/TRPM4/SLC1A1/NMU/CHGA 12

BP GO:0090077 foam cell differentiation 12/2416 38/18862 0.00206192432378142 0.0120363065325536 0.00838629976526387 PLA2G2A/STAT1/PPARG/PF4/AGT/CD36/LPL/CETP/PRKCH/ITGAV/NFKBIA/ABCA5 12

BP GO:0097242 amyloid-beta clearance 12/2416 38/18862 0.00206192432378142 0.0120363065325536 0.00838629976526387 C3/ITGB2/INSR/MME/CLU/CD36/TNF/C5AR1/IFNGR1/HMGCR/IFNG/LRP4 12

BP GO:2000249 regulation of actin cytoskeleton reorganization 12/2416 38/18862 0.00206192432378142 0.0120363065325536 0.00838629976526387 HCLS1/ESAM/ARHGDIB/IQGAP2/TEK/GMFG/SEMA3E/BAIAP2L2/CSF1R/HCK/STAP1/CSF3 12

BP GO:0033135 regulation of peptidyl-serine phosphorylation 31/2416 143/18862 0.0021009294196336 0.0122519954413075 0.00853658106957932 INPP5J/CNKSR3/HCLS1/CD44/DDIT4/SH2D3C/RAMP3/FNIP2/PINK1/RIPK2/CAV1/GPD1L/HGF/MAD2L2/RASSF2/MIF/SMAD7/BCAR3/TNF/WNT5A/LIF/IL6/IFNG/TCL1A/PFN2/OSM/HSP90AB1/SFRP2/IL11/CSF3/DKK1 31

BP GO:0032309 icosanoid secretion 13/2416 43/18862 0.00211898246436835 0.0122971134251562 0.00856801703677871 PLA2G2A/CYP4F2/PLA2G12B/IL1B/ANXA1/EDN1/NOS2/PTGES/PLA2G12A/PLA2G2D/TNFSF11/P2RX4/MAP2K6 13

BP GO:0043300 regulation of leukocyte degranulation 13/2416 43/18862 0.00211898246436835 0.0122971134251562 0.00856801703677871 LYN/FGR/SPHK2/ITGB2/PTAFR/RAC2/IL13RA2/STXBP1/FCGR2B/CD300A/F2RL1/FOXF1/CD177 13

BP GO:0046006 regulation of activated T cell proliferation 13/2416 43/18862 0.00211898246436835 0.0122971134251562 0.00856801703677871 MIR21/CD274/IL2RA/IL12RB1/BTN2A2/HHLA2/LRRC32/IL27RA/TNFSF9/LILRB4/IL23A/CRTAM/PRKAR1A 13

BP GO:0061383 trabecula morphogenesis 13/2416 43/18862 0.00211898246436835 0.0122971134251562 0.00856801703677871 GREM1/CHAD/ADAMTS1/HEG1/TEK/OVOL2/SEMA4D/BMP7/COL1A1/S1PR1/BMP5/ENG/NRG1 13

BP GO:0097178 ruffle assembly 13/2416 43/18862 0.00211898246436835 0.0122971134251562 0.00856801703677871 SNX10/ICAM1/TACSTD2/COBL/DEF8/CAV1/AIF1/RCC2/EVL/SH3BP1/PFN2/STAP1/EPS8L3 13

BP GO:1901293 nucleoside phosphate biosynthetic process 51/2416 267/18862 0.00212112716295292 0.0122975854972757 0.00856834595315307 PDK2/NNMT/PARP9/KYNU/IDO1/SLC26A2/SPHK2/PDZD3/PPARGC1A/ACAT1/NMNAT3/PDHA1/MLYCD/AK3/GUCA2B/PPT1/HPCA/ADCY3/AMPD1/ACSS2/PANK3/SCD/KMO/NOS2/PINK1/PANK1/VCP/GUCA2A/ADA/NAMPT/PDK4/ACSL4/NME1/NMNAT1/PAPSS2/ME1/PDP1/PTGS2/PAPSS1/HSD17B8/RRM2/PNP/RFK/ADCY6/GUCY2C/ADCY4/NUDT12/PDK1/ACSL1/IDO2/H19 51

BP GO:0006525 arginine metabolic process 8/2416 20/18862 0.00215797413183614 0.0123887924272868 0.00863189440580123 DDAH2/AGMAT/MIR21/OTC/SLC7A7/ASS1/NOS2/NAGS 8

BP GO:0009074 aromatic amino acid family catabolic process 8/2416 20/18862 0.00215797413183614 0.0123887924272868 0.00863189440580123 TAT/KYNU/IDO1/ASRGL1/TDO2/KMO/IL4I1/IDO2 8

BP GO:0009083 branched-chain amino acid catabolic process 8/2416 20/18862 0.00215797413183614 0.0123887924272868 0.00863189440580123 ACAT1/ALDH6A1/HIBCH/PPM1K/AUH/BCAT1/ACADSB/BCKDHB 8

BP GO:0010310 regulation of hydrogen peroxide metabolic process 8/2416 20/18862 0.00215797413183614 0.0123887924272868 0.00863189440580123 MMP3/DUOXA2/DUOXA1/FYN/RAC2/PINK1/SOD2/MPV17L 8

BP GO:0032928 regulation of superoxide anion generation 8/2416 20/18862 0.00215797413183614 0.0123887924272868 0.00863189440580123 ITGB2/GNAI2/TYROBP/HVCN1/F2RL1/PON3/FPR2/CD177 8

BP GO:0034104 negative regulation of tissue remodeling 8/2416 20/18862 0.00215797413183614 0.0123887924272868 0.00863189440580123 GREM1/UBASH3B/CD38/GPR137B/IL6/TNFAIP3/TNFRSF11B/TMEM119 8

BP GO:0035988 chondrocyte proliferation 8/2416 20/18862 0.00215797413183614 0.0123887924272868 0.00863189440580123 FGFR3/MIR21/STC1/DDR2/IHH/LTF/MMP14/SMAD7 8

BP GO:0043373 CD4-positive, alpha-beta T cell lineage commitment 8/2416 20/18862 0.00215797413183614 0.0123887924272868 0.00863189440580123 SLAMF6/IL12RB1/STAT3/IL23A/IRF4/BATF/LY9/IL6 8

BP GO:0046885 regulation of hormone biosynthetic process 8/2416 20/18862 0.00215797413183614 0.0123887924272868 0.00863189440580123 HIF1A/PPARGC1A/ADM/CLCN2/DGKQ/EGR1/BMP5/CYP27B1 8

BP GO:0014823 response to activity 18/2416 69/18862 0.00215972404898507 0.0123887924272868 0.00863189440580123 HIF1A/PPARGC1A/PCK1/ANGPT2/ALAD/EDN1/AGT/RARRES2/COL4A2/CXCR4/SOD2/SLC25A25/SRD5A1/ITGA2/IL6/CAT/UQCRC1/ABCG5 18

BP GO:0050688 regulation of defense response to virus 18/2416 69/18862 0.00215972404898507 0.0123887924272868 0.00863189440580123 MMP12/PARP9/TRAF3IP2/SEC14L1/ZC3H12A/STAT1/LILRB1/AIM2/MICB/HTRA1/IL2RA/IL12RB1/APOBEC3G/IL23A/MAVS/TSPAN6/TNFAIP3/ZDHHC11 18

BP GO:0030728 ovulation 7/2416 16/18862 0.00223027617448997 0.0127322279693106 0.0088711832106906 RGS2/ADAMTS1/MMP19/HPGD/TNFAIP6/INHBA/NRIP1 7

BP GO:0045779 negative regulation of bone resorption 7/2416 16/18862 0.00223027617448997 0.0127322279693106 0.0088711832106906 UBASH3B/CD38/GPR137B/IL6/TNFAIP3/TNFRSF11B/TMEM119 7

BP GO:0051709 regulation of killing of cells of other organism 7/2416 16/18862 0.00223027617448997 0.0127322279693106 0.0088711832106906 SERPINB9/CXCL6/NOS2/PRF1/F2RL1/IFNG/KRT6A 7

BP GO:0071800 podosome assembly 7/2416 16/18862 0.00223027617448997 0.0127322279693106 0.0088711832106906 MSN/FSCN1/LCP1/SH3PXD2B/ASAP1/HCK/TNF 7

BP GO:0072109 glomerular mesangium development 7/2416 16/18862 0.00223027617448997 0.0127322279693106 0.0088711832106906 CFLAR/PDGFRB/CD34/BMP7/EGR1/GPR4/SERPINB7 7

BP GO:0033209 tumor necrosis factor-mediated signaling pathway 36/2416 174/18862 0.00229409392749818 0.0130840189549178 0.00911629367311037 CASP1/PSMB9/CASP4/BIRC3/CD40/PIAS3/STAT1/NR1H4/AIM2/LAPTM5/TNFSF13B/TNFRSF1B/JAK2/TNFSF8/CCDC3/CD27/PSMB8/TNFRSF9/SPATA2/TNFSF9/PLVAP/TNFSF13/CARD8/LTA/TNFSF11/TRAF1/TNFRSF12A/SPHK1/LTB/TNF/NFKBIA/F2RL1/TNFAIP3/PSMA8/TNFRSF11B/TNFRSF17 36

BP GO:0060055 angiogenesis involved in wound healing 10/2416 29/18862 0.00230920630544373 0.0131450521303196 0.0091588185542407 MCAM/XBP1/CD34/KDR/ETS1/CXCR4/GPR4/TNF/SERPINE1/TNFAIP3 10

BP GO:1900027 regulation of ruffle assembly 10/2416 29/18862 0.00230920630544373 0.0131450521303196 0.0091588185542407 ICAM1/TACSTD2/COBL/DEF8/CAV1/RCC2/EVL/PFN2/STAP1/EPS8L3 10

BP GO:0007586 digestion 30/2416 138/18862 0.00234656378271189 0.0133449619703844 0.00929810578826679 SLC22A5/PBLD/SERPINA3/SNX10/PPARGC1A/PNLIPRP2/NOD2/VIL1/GUCA2B/ALPI/TFF1/GUCA2A/TIFAB/MOGAT2/FABP2/CD36/VSIG1/FABP1/SLC5A1/GUCY2C/WNK4/TYMP/AQP1/TLR4/CAPN9/PRSS3/PRSS1/TFF2/ABCG5/NMU 30

BP GO:0002455 humoral immune response mediated by circulating immunoglobulin 33/2416 156/18862 0.00235005057051398 0.0133520509058754 0.00930304500594815 CD55/C2/C4BPB/IGKC/SERPING1/HLA-DRB1/C3/C1R/IGLV2-23/IGLV3-19/NOD2/IGHM/PTPRC/IGLV1-44/TRBC1/CFI/C1S/CR1/IGLV6-57/CLU/C4BPA/IGHG1/FCGR2B/IGKV3-20/IGKV4-1/IGHV1-69/LTA/TNF/PTPN6/IGHD/IGKV1-5/CR2/HLA-DQB1 33

BP GO:0006650 glycerophospholipid metabolic process 63/2416 346/18862 0.00235628143602527 0.0133747022463911 0.00931882733345333 LPCAT1/LIPC/ETNK1/PLA2G2A/NAAA/INPP5J/ABHD5/ITPKA/AGPAT4/PLCD1/MTMR11/LPIN1/PIK3R3/PLA1A/IMPA2/PNLIPRP2/PLD1/IP6K2/PRDX6/NR1H4/LPGAT1/SOCS3/SOCS1/GPCPD1/FABP3/CWH43/BPNT1/PDGFRB/OSBPL8/ALPI/PGAP3/SLC44A1/CHPT1/DGKQ/PLEK/CHKA/GPD1L/PLA2G12A/OCRL/PIGZ/PLA2G7/PLA2G2D/PIK3R5/HADHA/ENPP2/ABHD3/CSF1R/GDPD3/PLCG2/MBOAT1/PIK3CD/CETP/TTC7B/FGF2/PIP5K1B/NAPEPLD/CRLS1/APOC1/SLC44A3/SERINC2/MTM1/STARD10/CDS1 63

BP GO:0002495 antigen processing and presentation of peptide antigen via MHC class II 24/2416 103/18862 0.00236829502236465 0.013430103076397 0.00935742787643701 OSBPL1A/SEC13/HLA-DMA/SEC24D/HLA-DRB1/IFI30/CTSE/SEC24A/CD74/HLA-DRA/KIFAP3/HLA-DMB/HLA-DOB/FCER1G/RILP/FCGR2B/HLA-DPA1/SH3GL2/HLA-DPB1/LAG3/SEC24C/AP1M2/HLA-DQB1/HLA-DQA1 24

BP GO:0009064 glutamine family amino acid metabolic process 19/2416 75/18862 0.00238046337695689 0.0134862754055733 0.00939656596167195 TAT/GLUL/ALDH18A1/DDAH2/ASRGL1/NR1H4/DAO/AGMAT/MIR21/OTC/SLC7A11/ALDH5A1/SLC7A7/ASS1/NOS2/NAGS/GOT1/GFPT2/CPS1 19

BP GO:0019369 arachidonic acid metabolic process 16/2416 59/18862 0.00242978081878689 0.013752605584017 0.00958213158405985 CYP2B6/CYP4F2/TBXAS1/CYP4F12/PTGDS/PTGES/EPHX2/FAAH/CYP2J2/PTGS2/MGLL/HPGDS/CYP2S1/EPHX1/AKR1C3/CYP2C9 16

BP GO:0051702 biological process involved in interaction with symbiont 22/2416 92/18862 0.00249831603284169 0.0141271001477576 0.00984306077055874 APOL1/ZC3H12A/CXCL6/PPIB/PF4/CFHR2/STOM/SMARCB1/CCL4/LRRC19/LEF1/FBXL2/DEFA5/POU2F3/LTF/CSF1R/NAPEPLD/FN1/F2RL1/AQP1/CAV2/KRT6A 22

BP GO:1903510 mucopolysaccharide metabolic process 26/2416 115/18862 0.00251182880936361 0.0141900471126134 0.00988691908499819 CHST2/LUM/IL1B/CHST3/BGN/CD44/CHST11/CSGALNACT2/UGDH/CHST15/ST3GAL1/SLC35D2/HYAL2/HGF/CHSY1/SPOCK2/EGFLAM/DCN/FMOD/CSGALNACT1/VCAN/FGF2/CHSY3/ST3GAL4/HYAL1/LYVE1 26

BP GO:0001569 branching involved in blood vessel morphogenesis 11/2416 34/18862 0.00252773780663209 0.0142529019181904 0.00993071318743573 COL4A1/EDN1/LEF1/PLXND1/EDNRA/KDR/SEMA3E/IHH/ENG/NRARP/SFRP2 11

BP GO:0046640 regulation of alpha-beta T cell proliferation 11/2416 34/18862 0.00252773780663209 0.0142529019181904 0.00993071318743573 CD55/TWSG1/IRF1/CD274/PTPRC/RIPK2/IL23A/EBI3/CD3E/SH3RF1/RASAL3 11

BP GO:0001954 positive regulation of cell-matrix adhesion 15/2416 54/18862 0.00254091138854617 0.0143001245285507 0.00996361555371465 THY1/FERMT2/EPB41L5/CX3CL1/TEK/CEACAM6/EFEMP2/KDR/CCL21/MAP4K4/CCR7/CD36/FUT1/CD3E/SKAP1 15

BP GO:0045071 negative regulation of viral genome replication 15/2416 54/18862 0.00254091138854617 0.0143001245285507 0.00996361555371465 APOBEC3B/IFI16/IFITM3/IFITM2/ISG20/IFITM1/OAS2/APOBEC3G/SLPI/LTF/MAVS/BST2/ISG15/TNF/OASL 15

BP GO:0051047 positive regulation of secretion 55/2416 295/18862 0.00254448948916015 0.0143067522220703 0.00996823340093028 S100A8/SRI/HIF1A/CYP4F2/FGR/ABCB11/PCK2/HLA-DRB1/IL1B/SPHK2/ITGB2/NR1H4/XBP1/GJA1/VEGFC/PTAFR/CAMK2N1/SCIN/PPID/CD38/EDN1/P2RY1/JAK2/EDN3/KMO/PINK1/PTGES/PFKFB2/STXBP1/ACSL4/EXPH5/MYH10/GNAI2/TLR2/APLN/IL1A/RAB8B/TNFSF11/ILDR1/SPP1/P2RX4/TRPM4/INHBA/ADAM9/F2RL1/AQP1/IFNG/ADCYAP1/TLR4/VSNL1/CD33/MAP2K6/CXCL12/NMU/CD177 55

BP GO:0009306 protein secretion 66/2416 367/18862 0.00257647768593136 0.0144593286329105 0.0100745410556043 SLC16A1/PIM3/CPT1A/SRI/HIF1A/PCK2/HLA-DRB1/IL1B/ANXA1/IRS1/NECAB3/EFNA5/ARFGAP3/NR1H4/GJA1/VEGFC/PAM/CAMK2N1/ACVR1C/GNPTAB/KLF7/STEAP3/PPID/HADH/CD38/PDIA4/IL1RN/HNF4A/JAK2/NOS2/PFKFB2/PLEK/RAB13/ITPR1/UCP2/ACSL4/EXPH5/MYH10/LTBP2/RHBDF2/TLR2/SEL1L/RCN3/HNF1B/IL1A/PCLO/RAB8B/LLGL2/RAPGEF4/TNF/CACNA1D/TRPM4/IL6/OLFM2/HMGCR/ADAM9/F2RL1/IFNG/ADCYAP1/TLR4/VSNL1/CD33/PPY/TCIRG1/NMU/CHGA 66

BP GO:0045862 positive regulation of proteolysis 66/2416 367/18862 0.00257647768593136 0.0144593286329105 0.0100745410556043 S100A8/IFI16/CASP1/ECSCR/LYN/BCL2L10/MAP3K5/IL1B/TRIB2/CTSH/ZC3H12A/S100A9/PPARG/CTSC/ROBO1/FYN/EFNA1/MIR21/AIM2/LAPTM5/FAM162A/PCOLCE/IL33/KCNE2/CFLAR/F3/ACVR1C/TNFRSF1B/PLK2/TNFRSF10B/PYHIN1/JAK2/CR1/APH1B/PINK1/CEBPA/RIPK2/STAT3/VCP/CAV1/CLU/MALT1/LCK/HERPUD1/BAG2/CYCS/RCN3/LRRK2/CARD8/NLRP1/MMP14/PMAIP1/SMAD7/TNF/FBXW7/KLKB1/SEMG1/FN1/ADAM9/SLC1A1/IFNG/SERPINB3/GRAMD4/SH3RF2/XDH/SFRP2 66

BP GO:0055076 transition metal ion homeostasis 30/2416 139/18862 0.00263348925256847 0.0147653771827922 0.0102877804638141 LCN2/S100A8/ABCG2/SRI/HIF1A/MT3/S100A9/SLC39A5/SLC30A10/BDH2/MT1G/FLVCR1/STEAP3/MT1F/MT1M/SLC25A37/HYAL2/SLC39A4/MT1E/LCK/STEAP4/CCDC115/LTF/MT1X/MT2A/SLC1A1/HEPH/IFNG/SLC30A1/CP 30

BP GO:0002504 antigen processing and presentation of peptide or polysaccharide antigen via MHC class II 24/2416 104/18862 0.00271245078713122 0.015167641923769 0.0105680585286593 OSBPL1A/SEC13/HLA-DMA/SEC24D/HLA-DRB1/IFI30/CTSE/SEC24A/CD74/HLA-DRA/KIFAP3/HLA-DMB/HLA-DOB/FCER1G/RILP/FCGR2B/HLA-DPA1/SH3GL2/HLA-DPB1/LAG3/SEC24C/AP1M2/HLA-DQB1/HLA-DQA1 24

BP GO:0035902 response to immobilization stress 9/2416 25/18862 0.00271287018300969 0.015167641923769 0.0105680585286593 PPARG/REG1A/HNMT/TFF1/FOXO4/SOD2/GOT1/FOS/TPH1 9

BP GO:0097164 ammonium ion metabolic process 9/2416 25/18862 0.00271287018300969 0.015167641923769 0.0105680585286593 DDC/SLC44A1/HNMT/CHKA/CHDH/SRD5A1/BCHE/HDC/TPH1 9

BP GO:0006919 activation of cysteine-type endopeptidase activity involved in apoptotic process 21/2416 87/18862 0.002742345796657 0.015309220266253 0.0106667032762925 S100A8/BCL2L10/CTSH/S100A9/PPARG/ROBO1/LAPTM5/FAM162A/CFLAR/F3/TNFRSF10B/JAK2/VCP/LCK/CYCS/CARD8/NLRP1/PMAIP1/TNF/SLC1A1/XDH 21

BP GO:0071560 cellular response to transforming growth factor beta stimulus 48/2416 251/18862 0.00274333007455674 0.015309220266253 0.0106667032762925 GCNT2/FGFR2/HSPA5/PBLD/PMEPA1/TWSG1/FERMT2/EPB41L5/COL1A2/PPARGC1A/CDKN2B/FYN/CHST11/MIR21/FBN1/CFLAR/CLDN1/HTRA1/CDH5/COL3A1/ZYX/EDN1/OVOL2/APPL2/CAV1/HYAL2/COL4A2/FUT8/COL1A1/LTBP2/LRRC32/GOT1/FMOD/DUSP22/HPGD/HTRA4/LRG1/SMAD7/ENG/GLG1/FOS/WNT5A/ADAM9/CAV2/CGN/BAMBI/HSP90AB1/WNT2 48

BP GO:0045824 negative regulation of innate immune response 17/2416 65/18862 0.0027496343927255 0.0153300476900318 0.010681214789328 IRAK3/IFI16/MMP12/SERPING1/SERPINB9/PPARG/LILRB1/MIR21/SLAMF8/CR1/NMI/DUSP10/NLRC5/NLRC3/TRAFD1/PARP14/TNFAIP3 17

BP GO:0035592 establishment of protein localization to extracellular region 66/2416 368/18862 0.00275585434847878 0.015350366277508 0.010695371770535 SLC16A1/PIM3/CPT1A/SRI/HIF1A/PCK2/HLA-DRB1/IL1B/ANXA1/IRS1/NECAB3/EFNA5/ARFGAP3/NR1H4/GJA1/VEGFC/PAM/CAMK2N1/ACVR1C/GNPTAB/KLF7/STEAP3/PPID/HADH/CD38/PDIA4/IL1RN/HNF4A/JAK2/NOS2/PFKFB2/PLEK/RAB13/ITPR1/UCP2/ACSL4/EXPH5/MYH10/LTBP2/RHBDF2/TLR2/SEL1L/RCN3/HNF1B/IL1A/PCLO/RAB8B/LLGL2/RAPGEF4/TNF/CACNA1D/TRPM4/IL6/OLFM2/HMGCR/ADAM9/F2RL1/IFNG/ADCYAP1/TLR4/VSNL1/CD33/PPY/TCIRG1/NMU/CHGA 66

BP GO:0090288 negative regulation of cellular response to growth factor stimulus 25/2416 110/18862 0.00279050138069258 0.0155288405498859 0.0108197237670964 TNMD/GREM1/TWSG1/SULF1/PPARG/FBN1/CFLAR/HTRA1/CXCL13/MMRN2/AGT/SEMA6A/SULF2/DCN/APLN/HHEX/FGF2/SMAD7/WNT5A/ADAMTS12/SOSTDC1/XDH/BAMBI/SFRP2/TOB1 25

BP GO:0071692 protein localization to extracellular region 67/2416 375/18862 0.00282912094721677 0.0157290679528096 0.0109592322631286 SLC16A1/PIM3/CPT1A/SRI/HIF1A/PCK2/HLA-DRB1/IL1B/ANXA1/IRS1/NECAB3/EFNA5/ARFGAP3/NR1H4/GJA1/VEGFC/PAM/CAMK2N1/FBN1/ACVR1C/GNPTAB/KLF7/STEAP3/PPID/HADH/CD38/PDIA4/IL1RN/HNF4A/JAK2/NOS2/PFKFB2/PLEK/RAB13/ITPR1/UCP2/ACSL4/EXPH5/MYH10/LTBP2/RHBDF2/TLR2/SEL1L/RCN3/HNF1B/IL1A/PCLO/RAB8B/LLGL2/RAPGEF4/TNF/CACNA1D/TRPM4/IL6/OLFM2/HMGCR/ADAM9/F2RL1/IFNG/ADCYAP1/TLR4/VSNL1/CD33/PPY/TCIRG1/NMU/CHGA 67

BP GO:0044106 cellular amine metabolic process 33/2416 158/18862 0.00291064511537701 0.0161672366147689 0.0112645263944301 NAAA/PSMB9/KYNU/IDO1/SULT1A2/ITGB2/NR1H4/DAO/SRM/AGMAT/MIR21/TDO2/OAZ2/SLC7A11/SULT1A1/SLC7A7/DDC/SLC44A1/HNMT/KMO/MAOA/CHKA/PSMB8/GDPD3/AKR1B1/NAPEPLD/CHDH/NR4A2/SULT1B1/IDO2/PSMA8/HDC/TPH1 33

BP GO:0043010 camera-type eye development 57/2416 310/18862 0.00295813478302587 0.0164157200249853 0.0114376572763276 LPCAT1/PDE6A/PITX2/THY1/COL4A1/HIF1A/RCN1/TWSG1/LAMA1/TWIST1/FBN1/CLCN2/PDGFRB/SLC7A11/RHOJ/HPCA/KRT12/SHROOM2/HES5/VIM/TGIF2/ZHX2/FZD5/SERPINF1/BMP7/TULP3/PTPRM/DIO3/IHH/SLC25A25/ALDH1A2/EPHA2/FJX1/SDK1/SLITRK6/EFEMP1/THRB/CLIC4/FGF2/BCAR3/TDRD7/PROM1/WNT5A/LAMB2/INHBA/USH1C/SLC1A1/MEIS1/KLF4/GRHL2/NDP/CRYBA2/BFSP2/ALDH1A3/TCIRG1/TSPAN12/WNT2 57

BP GO:0002474 antigen processing and presentation of peptide antigen via MHC class I 23/2416 99/18862 0.00300250620554788 0.016634884412076 0.011590360121095 SEC13/SEC24D/TAP2/PSMB9/TAP1/IFI30/NCF2/SEC24A/MR1/FCGR1B/CALR/NCF4/FCER1G/PSMB8/CLEC4A/CD36/FCGR1A/ITGAV/CD207/SEC24C/AZGP1/PSMA8/ERAP2 23

BP GO:1901568 fatty acid derivative metabolic process 20/2416 82/18862 0.00300321067573721 0.016634884412076 0.011590360121095 HMGCS2/PTGR1/CYP4F2/ACAT1/BDH1/BDH2/PAM/CYP4F12/HMGCL/PPT1/SCD/ACSL4/HPGD/FAR2/HSD17B8/GGT5/GGT6/ACSL1/TYRP1/ALOX5AP 20

BP GO:0032720 negative regulation of tumor necrosis factor production 18/2416 71/18862 0.0030332281873021 0.0167855524571221 0.0116953381213964 IRAK3/ZC3H12A/CX3CL1/NOD2/NR1H4/LILRB1/TWIST1/SIRPA/SYT11/CD34/SLAMF1/CLEC4A/IL27RA/NLRC3/PTPN6/TNFAIP3/TLR4/CD33 18

BP GO:0150063 visual system development 65/2416 363/18862 0.00306749056891897 0.0169029212257816 0.0117771148420538 LPCAT1/PDE6A/PITX2/FREM2/THY1/COL4A1/HIF1A/RCN1/C3/TWSG1/LAMA1/COL5A2/SLC39A5/TWIST1/FBN1/CLCN2/PDGFRB/SLC7A11/RHOJ/HPCA/KRT12/PBX1/SHROOM2/HES5/VIM/TGIF2/ZHX2/FZD5/STAT3/SERPINF1/SH3PXD2B/BMP7/TULP3/PTPRM/DIO3/IHH/SLC25A25/ALDH1A2/EPHA2/FJX1/SDK1/SLITRK6/EFEMP1/THRB/CLIC4/FGF2/COL5A1/BCAR3/TDRD7/PROM1/WNT5A/LAMB2/INHBA/USH1C/SLC1A1/MEIS1/KLF4/GRHL2/NDP/CRYBA2/BFSP2/ALDH1A3/TCIRG1/TSPAN12/WNT2 65

BP GO:0002828 regulation of type 2 immune response 10/2416 30/18862 0.00307145363884589 0.0169029212257816 0.0117771148420538 IDO1/ANXA1/NOD2/IL33/CD74/CD86/IL27RA/BCL6/ECM1/IL6 10

BP GO:0008209 androgen metabolic process 10/2416 30/18862 0.00307145363884589 0.0169029212257816 0.0117771148420538 HSD3B2/PPARGC1A/ADM/SRD5A3/HSD17B3/HSD17B11/CYP3A4/HSD17B8/SPP1/SRD5A1 10

BP GO:0050850 positive regulation of calcium-mediated signaling 10/2416 30/18862 0.00307145363884589 0.0169029212257816 0.0117771148420538 CHP2/ERBB3/CCL4/ADA/P2RX5/LMCD1/P2RX4/TNF/CD3E/TRAT1 10

BP GO:0061099 negative regulation of protein tyrosine kinase activity 10/2416 30/18862 0.00307145363884589 0.0169029212257816 0.0117771148420538 THY1/SH3BP5/PTPRC/CAV1/HYAL2/CBLC/PTK6/LILRB4/DUSP22/ERRFI1 10

BP GO:2000406 positive regulation of T cell migration 10/2416 30/18862 0.00307145363884589 0.0169029212257816 0.0117771148420538 CXCL10/CXCL13/CCL20/DOCK8/CCL21/AIF1/ITGA4/WNT5A/S100A7/CXCL12 10

BP GO:0002363 alpha-beta T cell lineage commitment 8/2416 21/18862 0.00309849539015347 0.0170203064749444 0.0118589030455061 SLAMF6/IL12RB1/STAT3/IL23A/IRF4/BATF/LY9/IL6 8

BP GO:0061042 vascular wound healing 8/2416 21/18862 0.00309849539015347 0.0170203064749444 0.0118589030455061 MCAM/XBP1/CD34/KDR/CXCR4/TNF/SERPINE1/TNFAIP3 8

BP GO:0031623 receptor internalization 25/2416 111/18862 0.00317273097015801 0.0173960226146658 0.0121206833653933 RAB31/MAGI2/GREM1/RAMP2/ADM/ITGB2/LILRB1/SAG/INSR/HPCA/RAMP3/CAV1/CXCR2/FCER1G/LILRB4/APLN/CD36/PLCG2/WDR54/MX2/CXCR1/CALCRL/SELE/DNM1/DKK1 25

BP GO:1905954 positive regulation of lipid localization 25/2416 111/18862 0.00317273097015801 0.0173960226146658 0.0121206833653933 ABCA12/CYP4F2/IL1B/C3/ZC3H12A/ABCA8/ATP8A1/FABP3/VSTM2A/EDN1/KMO/PTGES/CAV1/STXBP1/LIPG/CD36/LPL/CETP/TNFSF11/SPP1/P2RX4/NFKBIA/ACSL1/ABCB4/MAP2K6 25

BP GO:0060993 kidney morphogenesis 21/2416 88/18862 0.00317591104942907 0.0173974539104754 0.0121216806211278 GREM1/STAT1/TACSTD2/PDGFRB/BASP1/PBX1/HES5/AGT/BMP7/WWTR1/LRRK2/HNF1B/FGF2/HOXB7/DCHS1/GCNT1/PKD2/WNK4/LIF/LAMA5/OSR1 21

BP GO:0007566 embryo implantation 14/2416 50/18862 0.00322042137830396 0.0175927693993507 0.0122577667397454 TIMP1/MMP9/IL1B/IGFBP7/BSG/ARHGDIB/GJA1/MIR21/ACVR1C/CALR/STC1/SPP1/LIF/DDR1 14

BP GO:0048260 positive regulation of receptor-mediated endocytosis 14/2416 50/18862 0.00322042137830396 0.0175927693993507 0.0122577667397454 MAGI2/GREM1/C3/INSR/PPT1/CLU/CCL21/CCL19/WASL/APLN/PLCG2/SGIP1/SELE/SERPINE1 14

BP GO:0070671 response to interleukin-12 14/2416 50/18862 0.00322042137830396 0.0175927693993507 0.0122577667397454 MSN/CNN2/SIRPA/PDCD4/JAK2/IL12RB1/RIPK2/LCP1/P4HB/SOD2/MIF/CA1/STAT4/IFNG 14

BP GO:0006520 cellular amino acid metabolic process 60/2416 331/18862 0.00326553402536989 0.0177760540705369 0.0123854703829509 TAT/PSMB9/KYNU/ABAT/CBS/IDO1/GLUL/ALDH18A1/SEPSECS/PPA1/ACAT1/DDAH2/ASRGL1/NR1H4/DAO/AGMAT/MIR21/OTC/TDO2/RIMKLA/HMGCL/OAZ2/SLC7A11/ALDH5A1/ALDH6A1/SLC7A7/DDC/PSAT1/TST/MPST/BPHL/HNMT/HNF4A/HIBCH/ASS1/KMO/NOS2/SLC16A2/NAGS/DDO/AMT/IYD/AUH/PSMB8/SHMT2/SDSL/GOT1/BCAT1/ACADSB/CTH/ASPA/GFPT2/GGT5/IL4I1/GPT/IDO2/PSMA8/HDC/CRYM/CPS1 60

BP GO:0019362 pyridine nucleotide metabolic process 11/2416 35/18862 0.00326590255154999 0.0177760540705369 0.0123854703829509 NNMT/PARP9/KYNU/IDO1/NMNAT3/KMO/NAMPT/NMNAT1/PTGS2/NUDT12/IDO2 11

BP GO:0042554 superoxide anion generation 11/2416 35/18862 0.00326590255154999 0.0177760540705369 0.0123854703829509 DUOX2/NCF2/ITGB2/EDN1/GNAI2/TYROBP/HVCN1/F2RL1/PON3/FPR2/CD177 11

BP GO:0046496 nicotinamide nucleotide metabolic process 11/2416 35/18862 0.00326590255154999 0.0177760540705369 0.0123854703829509 NNMT/PARP9/KYNU/IDO1/NMNAT3/KMO/NAMPT/NMNAT1/PTGS2/NUDT12/IDO2 11

BP GO:0032715 negative regulation of interleukin-6 production 17/2416 66/18862 0.0032699583678887 0.0177818903947232 0.0123895368433739 IRAK3/ZC3H12A/CX3CL1/NR1H4/SIRPA/SYT11/SLAMF1/HGF/NCKAP1L/BANK1/IL27RA/LILRB4/NLRC3/TNF/PTPN6/TNFAIP3/TLR4 17

BP GO:1901616 organic hydroxy compound catabolic process 19/2416 77/18862 0.0032797257859427 0.017818747205304 0.0124152168359103 INPP5J/LDHD/CYP4F2/IMPA2/MT3/SULT1A2/BPNT1/CYP4F12/SULT1A1/CYP27A1/MAOA/SORD/SRD5A3/OCRL/DIO3/AKR1B10/CYP27B1/SULT1B1/AKR1C3 19

BP GO:0042542 response to hydrogen peroxide 29/2416 135/18862 0.00330047230178819 0.017836327465384 0.0124274658867785 MAP3K5/PDE8A/ANXA1/FYN/MIR21/SIRPA/PDGFRB/PINK1/ADA/ETS1/FOSL1/MB/COL1A1/SOD2/HGF/LRRK2/NR4A3/FABP1/SPHK1/IL6/CAT/ADAM9/IL18RAP/TNFAIP3/NET1/BNIP3/AQP1/KLF4/ENDOG 29

BP GO:0002707 negative regulation of lymphocyte mediated immunity 13/2416 45/18862 0.00330975763089337 0.017836327465384 0.0124274658867785 C4BPB/SERPINB9/NOD2/LILRB1/PTPRC/IL7R/CR1/C4BPA/FCGR2B/LILRB4/BCL6/SMAD7/PTPN6 13

BP GO:0034122 negative regulation of toll-like receptor signaling pathway 13/2416 45/18862 0.00330975763089337 0.017836327465384 0.0124274658867785 IRAK3/LYN/NOD2/LY96/IRF4/LILRA2/CD300LF/CD300A/CD14/F2RL1/TNFAIP3/GRAMD4/TLR4 13

BP GO:0035307 positive regulation of protein dephosphorylation 13/2416 45/18862 0.00330975763089337 0.017836327465384 0.0124274658867785 MAGI2/LILRB2/PTPRC/PDGFRB/CDH5/PPP1R16B/JAK2/PINK1/FCRL3/CD300A/PPP1R14D/CD33/HSP90AB1 13

BP GO:1902895 positive regulation of pri-miRNA transcription by RNA polymerase II 12/2416 40/18862 0.00333406283623647 0.017836327465384 0.0124274658867785 HIF1A/PPARG/STAT3/ETS1/FOSL1/EGR1/SPI1/APLN/FGF2/TNF/FOS/KLF4 12

BP GO:1903524 positive regulation of blood circulation 12/2416 40/18862 0.00333406283623647 0.017836327465384 0.0124274658867785 EDN2/RGS2/ADM/EDN1/EDN3/ADA/RGS4/APLN/TRPM4/SLC1A1/NMU/CHGA 12

BP GO:1904037 positive regulation of epithelial cell apoptotic process 12/2416 40/18862 0.00333406283623647 0.017836327465384 0.0124274658867785 ECSCR/PPARGC1A/CD40/CCL2/PDCD4/JAK2/CD160/ITGA4/CD248/IL6/AKR1C3/H19 12

BP GO:0001771 immunological synapse formation 6/2416 13/18862 0.00336830607068503 0.017836327465384 0.0124274658867785 MSN/DOCK8/CCL21/CCL19/CCR7/PRF1 6

BP GO:0001886 endothelial cell morphogenesis 6/2416 13/18862 0.00336830607068503 0.017836327465384 0.0124274658867785 TNMD/COL15A1/HEG1/STC1/COL18A1/CLIC4 6

BP GO:0002430 complement receptor mediated signaling pathway 6/2416 13/18862 0.00336830607068503 0.017836327465384 0.0124274658867785 FPR1/CR1/C3AR1/C5AR1/CR2/FPR2 6

BP GO:0002551 mast cell chemotaxis 6/2416 13/18862 0.00336830607068503 0.017836327465384 0.0124274658867785 CCL11/VEGFC/RAC2/PIK3CD/SWAP70/CHGA 6

BP GO:0009437 carnitine metabolic process 6/2416 13/18862 0.00336830607068503 0.017836327465384 0.0124274658867785 CPT1A/CPT2/CROT/CRAT/SLC22A4/ACADM 6

BP GO:0042362 fat-soluble vitamin biosynthetic process 6/2416 13/18862 0.00336830607068503 0.017836327465384 0.0124274658867785 CYP27A1/CYP3A4/CYP27B1/TNF/IFNG/SNAI2 6

BP GO:0042659 regulation of cell fate specification 6/2416 13/18862 0.00336830607068503 0.017836327465384 0.0124274658867785 SOX17/FGF2/WNT5A/ESRP1/SFRP2/DKK1 6

BP GO:0042762 regulation of sulfur metabolic process 6/2416 13/18862 0.00336830607068503 0.017836327465384 0.0124274658867785 PDK2/MIR21/SLC7A11/PDK4/PDP1/PDK1 6

BP GO:0043379 memory T cell differentiation 6/2416 13/18862 0.00336830607068503 0.017836327465384 0.0124274658867785 HLA-DRB1/PCK1/HLA-DRA/IL12RB1/IL23A/BCL6 6

BP GO:0051764 actin crosslink formation 6/2416 13/18862 0.00336830607068503 0.017836327465384 0.0124274658867785 GAS2L3/DPYSL3/LCP1/BAIAP2L2/AIF1/FLNA 6

BP GO:0071635 negative regulation of transforming growth factor beta production 6/2416 13/18862 0.00336830607068503 0.017836327465384 0.0124274658867785 CDH3/LILRB1/GATA6/TYROBP/FN1/HSP90AB1 6

BP GO:0006577 amino-acid betaine metabolic process 7/2416 17/18862 0.00337573445989146 0.017836327465384 0.0124274658867785 CPT1A/CPT2/CROT/CRAT/SLC22A4/ACADM/CHDH 7

BP GO:0006586 indolalkylamine metabolic process 7/2416 17/18862 0.00337573445989146 0.017836327465384 0.0124274658867785 KYNU/IDO1/TDO2/DDC/KMO/IDO2/TPH1 7

BP GO:0010715 regulation of extracellular matrix disassembly 7/2416 17/18862 0.00337573445989146 0.017836327465384 0.0124274658867785 PDPN/FSCN1/FAP/ETS1/DDR2/IL6/DDR1 7

BP GO:0015732 prostaglandin transport 7/2416 17/18862 0.00337573445989146 0.017836327465384 0.0124274658867785 IL1B/EDN1/NOS2/PTGES/TNFSF11/P2RX4/MAP2K6 7

BP GO:0030730 sequestering of triglyceride 7/2416 17/18862 0.00337573445989146 0.017836327465384 0.0124274658867785 ENPP1/ABHD5/IL1B/PPARG/OSBPL8/LPL/TNF 7

BP GO:0032305 positive regulation of icosanoid secretion 7/2416 17/18862 0.00337573445989146 0.017836327465384 0.0124274658867785 CYP4F2/IL1B/EDN1/PTGES/TNFSF11/P2RX4/MAP2K6 7

BP GO:0033623 regulation of integrin activation 7/2416 17/18862 0.00337573445989146 0.017836327465384 0.0124274658867785 FERMT2/SELP/CXCL13/PLEK/RASIP1/FBLIM1/SKAP1 7

BP GO:0050665 hydrogen peroxide biosynthetic process 7/2416 17/18862 0.00337573445989146 0.017836327465384 0.0124274658867785 DUOX2/ACOX1/DUOXA2/DUOXA1/FYN/SOD2/MPV17L 7

BP GO:0070206 protein trimerization 7/2416 17/18862 0.00337573445989146 0.017836327465384 0.0124274658867785 CLYBL/COL1A2/MLKL/CD74/STEAP4/MIF/ALOX5AP 7

BP GO:0070593 dendrite self-avoidance 7/2416 17/18862 0.00337573445989146 0.017836327465384 0.0124274658867785 CNTN4/BSG/EMB/IGSF9/NEXN/ROBO4/MYPN 7

BP GO:0072567 chemokine (C-X-C motif) ligand 2 production 7/2416 17/18862 0.00337573445989146 0.017836327465384 0.0124274658867785 CD74/LPL/MCOLN2/TNF/F2RL1/KLF4/TLR4 7

BP GO:0150078 positive regulation of neuroinflammatory response 7/2416 17/18862 0.00337573445989146 0.017836327465384 0.0124274658867785 IL1B/CTSC/IL33/LRRK2/TNF/IL6/STAP1 7

BP GO:2000341 regulation of chemokine (C-X-C motif) ligand 2 production 7/2416 17/18862 0.00337573445989146 0.017836327465384 0.0124274658867785 CD74/LPL/MCOLN2/TNF/F2RL1/KLF4/TLR4 7

BP GO:0046883 regulation of hormone secretion 49/2416 260/18862 0.00338220110128282 0.0178546665754168 0.0124402436665523 SLC16A1/PIM3/CPT1A/SRI/HIF1A/PCK2/HLA-DRB1/IL1B/ANXA1/IRS1/EFNA5/NR1H4/GJA1/CAMK2N1/ACVR1C/KLF7/HADH/CD38/EDN1/P2RY1/HNF4A/JAK2/EDN3/AGT/NOS2/PFKFB2/ITPR1/UCP2/ACSL4/APLN/RAB8B/TNFSF11/RAPGEF4/ILDR1/SPP1/TNF/CACNA1D/TRPM4/LIF/INHBA/IL6/IFNG/ADCYAP1/VSNL1/OSM/TCIRG1/IL11/NMU/CHGA 49

BP GO:0006470 protein dephosphorylation 59/2416 325/18862 0.00339549522253245 0.0179089836515871 0.0124780891037639 PHLPP2/DAPP1/DUSP4/PPP2R3A/MAGI2/LILRB2/PTPN21/HSP90B1/EYA2/CDC25B/SAG/PPP1R3B/CTDSPL/UBASH3B/PTPRC/PDGFRB/CDH5/CDC14A/PPP1R16B/PTPRF/JAK2/PPM1M/PTPN7/PPP1R14C/PINK1/DUSP14/DUSP21/PPM1K/LCK/PTPRM/PTPRR/NCKAP1L/DUSP23/PTP4A3/DUSP10/GNAI2/CYCS/FCRL3/PPP1R14A/LRRK2/PPP3CC/PDP1/DUSP22/CD300A/SWAP70/TNF/PTPN6/PTPN3/PPP1R1B/MTM1/PPP1R14D/PHLPP1/ELFN1/SH3RF2/CD33/MINPP1/PPP1R16A/HSP90AB1/PTPRH 59

BP GO:0007178 transmembrane receptor protein serine/threonine kinase signaling pathway 64/2416 358/18862 0.00341406332775351 0.0179909968465172 0.0125352318190587 GCNT2/BMP3/RBPMS/HSPA5/PBLD/MAGI2/PMEPA1/GREM1/TWSG1/FERMT2/SULF1/COL1A2/ACVR2A/SLC39A5/CDKN2B/PPARG/CHST11/MIR21/FSTL1/FBN1/ACVR1C/HTRA1/CDH5/PDCD4/COL3A1/ZYX/HES5/VIM/TGIF2/HNF4A/JAK2/OVOL2/APPL2/LEF1/CAV1/BMP7/EGR1/FUT8/WWTR1/LTBP2/LRRC32/GOT1/FMOD/BMP5/DUSP22/HPGD/HTRA4/LRG1/SMAD7/ENG/GLG1/FOS/WNT5A/FAM83G/INHBA/ADAM9/CAV2/SOSTDC1/CGN/BAMBI/HSP90AB1/SFRP2/DKK1/TOB1 64

BP GO:0006956 complement activation 36/2416 178/18862 0.00341763280627767 0.017993897107257 0.0125372525764975 CD55/C2/C4BPB/CFB/IGKC/SERPING1/CFP/IL1B/C3/C1R/IGLV2-23/IGLV3-19/IGHM/IGLV1-44/TRBC1/CFHR2/CFI/C1S/CR1/IGLV6-57/FCN1/CLU/C4BPA/IGHG1/IGKV3-20/IGKV4-1/MFAP4/IGHV1-69/FCN3/CD19/C3AR1/CFD/C5AR1/IGHD/IGKV1-5/CR2 36

BP GO:0010717 regulation of epithelial to mesenchymal transition 23/2416 100/18862 0.00343660030414099 0.0180777915381115 0.012595706043421 GCNT2/PDPN/PBLD/IL1B/GREM1/OLFM1/FERMT2/EFNA1/MIR21/TWIST1/OVOL2/LEF1/BMP7/COL1A1/WWTR1/MAD2L2/BMP5/SMAD7/ENG/IL6/SERPINB3/BAMBI/SFRP2 23

BP GO:0048864 stem cell development 20/2416 83/18862 0.00348987787535892 0.0183257023234706 0.0127684379487975 SEMA5A/PITX2/HIF1A/TWIST1/PTPRC/SEMA4A/EDN1/EDN3/OVOL2/SEMA6A/EDNRA/SEMA4D/BMP7/SEMA3E/ALDH1A2/SEMA6D/NRG1/FN1/LAMA5/SNAI2 20

BP GO:0051262 protein tetramerization 20/2416 83/18862 0.00348987787535892 0.0183257023234706 0.0127684379487975 HLA-DRB1/TRPM6/TDO2/GBP5/CRTC3/APPL2/TRPV1/HOMER1/SOD2/SHMT2/ALDH1A2/MS4A1/HSD17B8/CTH/ACOT13/TRPM4/EVL/KCNJ2/PKD2/ALDH1A3 20

BP GO:0033619 membrane protein proteolysis 16/2416 61/18862 0.00350407780041368 0.0183840701500577 0.0128091057474351 TIMP1/BACE2/IL1B/CTSH/MMP7/TNFRSF1B/TIMP3/AFG3L2/APH1B/ADAM19/PRKCQ/TNF/TIMP2/PTPN3/ADAM9/IFNG 16

BP GO:0072009 nephron epithelium development 24/2416 106/18862 0.0035286943441761 0.0184969378111606 0.0128877463202099 PECAM1/MAGI2/GREM1/STAT1/AQP11/TACSTD2/CD34/BASP1/PBX1/HES5/AGT/PODXL/WWTR1/HNF1B/FGF2/PROM1/HOXB7/DCHS1/PKD2/LAMB2/WNK4/LIF/LAMA5/OSR1 24

BP GO:0032956 regulation of actin cytoskeleton organization 63/2416 352/18862 0.00355520934303585 0.0186195498106271 0.0129731762633211 SEMA5A/CCL11/ASAP3/HCLS1/FERMT2/CX3CL1/ESAM/EFNA5/ICAM1/ARHGDIB/IQGAP2/MIR21/TACSTD2/PAM/RAC2/VIL1/FSCN1/PDGFRB/COTL1/SORBS3/TEK/SCIN/EDN1/CORO1A/GMFG/PLEK/RHOH/SPIRE2/GPR65/SEMA3E/ARPC1B/BAIAP2L2/CCL21/NCKAP1L/RHOQ/CCR7/RGS4/DBN1/S1PR1/KANK4/WASL/PREX1/SHANK3/WAS/CSF1R/ARHGEF10L/HCK/WASF1/BST2/SWAP70/EVL/MYADM/FLNA/FZD10/F2RL1/MIR214/RND1/SH3BP1/PFN2/STAP1/CXCL12/CSF3/CDC42EP5 63

BP GO:0048708 astrocyte differentiation 18/2416 72/18862 0.00356962506223635 0.0186786350930014 0.0130143439494685 S100A8/BACE2/MT3/S100A9/HES5/VIM/STAT3/CLCF1/TNF/C5AR1/LAMB2/IFNGR1/LIF/IL6/IFNG/TLR4/TSPAN2/FPR2 18

BP GO:2001236 regulation of extrinsic apoptotic signaling pathway 32/2416 154/18862 0.00362350048736065 0.0189439148286574 0.0131991776755658 PEA15/FAIM2/IL1B/UNC5B/STRADB/ICAM1/EYA2/FYN/PTPRC/CFLAR/PF4/TNFRSF10B/G0S2/ITPRIP/TIMP3/AGT/CAV1/HYAL2/HGF/BMP5/IL1A/TRAF1/PMAIP1/TNFRSF12A/ITGAV/TNF/SH3RF1/INHBA/SERPINE1/TNFAIP3/SFRP2/SNAI2 32

BP GO:0001654 eye development 64/2416 359/18862 0.00364753917309151 0.0190528777139574 0.0132750975947654 LPCAT1/PDE6A/PITX2/FREM2/THY1/COL4A1/HIF1A/RCN1/TWSG1/LAMA1/COL5A2/SLC39A5/TWIST1/FBN1/CLCN2/PDGFRB/SLC7A11/RHOJ/HPCA/KRT12/PBX1/SHROOM2/HES5/VIM/TGIF2/ZHX2/FZD5/STAT3/SERPINF1/SH3PXD2B/BMP7/TULP3/PTPRM/DIO3/IHH/SLC25A25/ALDH1A2/EPHA2/FJX1/SDK1/SLITRK6/EFEMP1/THRB/CLIC4/FGF2/COL5A1/BCAR3/TDRD7/PROM1/WNT5A/LAMB2/INHBA/USH1C/SLC1A1/MEIS1/KLF4/GRHL2/NDP/CRYBA2/BFSP2/ALDH1A3/TCIRG1/TSPAN12/WNT2 64

BP GO:0048525 negative regulation of viral process 21/2416 89/18862 0.00366541792706766 0.0191295016158698 0.0133284853187224 APOBEC3B/IFI16/IFITM3/IFITM2/ISG20/IFITM1/OAS2/STAT1/CIITA/FCN1/APOBEC3G/SLPI/LTF/MAVS/FCN3/BST2/LY6E/ISG15/TNF/ZFP36/OASL 21

BP GO:0006721 terpenoid metabolic process 27/2416 124/18862 0.00367823227359677 0.0191404641788567 0.0133361234873878 HMGCS2/LRP8/SDR16C5/RDH5/ADH6/RETSAT/PECR/RBP2/RARRES2/APOM/ADH1C/ALDH1A2/CYP3A4/AKR1B10/LPL/AKR1B1/NAPEPLD/TTR/SRD5A1/SDC2/CYP27C1/APOC2/CYP2S1/AKR1C3/ALDH1A3/CYP2C9/ALDH1A1 27

BP GO:0006706 steroid catabolic process 9/2416 26/18862 0.00368357590824642 0.0191404641788567 0.0133361234873878 MT3/CYP27A1/STS/HSD17B11/HSD11B1/CYP3A4/CYP27B1/SPP1/SRD5A1 9

BP GO:0010460 positive regulation of heart rate 9/2416 26/18862 0.00368357590824642 0.0191404641788567 0.0133361234873878 EDN2/ADM/EDN1/EDN3/ADA/RGS4/TRPM4/SLC1A1/NMU 9
[truncated: 494,487 more chars]
